# Supplementary material for: Proteomic analysis of Fasciola gigantica excretory and secretory products (FgESPs) co-immunoprecipitated using a time course of infected buffalo sera
Source: Front Microbiol. 2022 Dec 23;13:1089394. doi: 10.3389/fmicb.2022.1089394 (PMC9816151; doi:10.3389/fmicb.2022.1089394)
Supplement: Supplementary file 3 [file Table_3.XLSX]

## Sheet: A1W7
Table S3. List of proteins identified in the non-infection group.
Names	Species	Acc	#Peptide	#Unique Peptide	Coverage(%)	Length	Mass	GO function(Biological Process)	GO function(Cellular Component)	GO function(Molecular Function)	COG_function	Kegg_function
L-plastin OS=Fasciola gigantica OX=46835 GN=FGIG_03928 PE=4 SV=1	F.gigantica	tr|A0A504YSL7|A0A504YSL7_FASGI	89	89	80.92	650	73873.6	reproductive process;cellular process	cellular anatomical entity	binding	--	--
Alpha-actinin sarcomeric OS=Fasciola gigantica OX=46835 GN=FGIG_01730 PE=4 SV=1	F.gigantica	tr|A0A504WV76|A0A504WV76_FASGI	42	42	70.21	423	49371.2	response to stimulus;developmental process;behavior;cellular process;multicellular organismal process;biological regulation;metabolic process	cellular anatomical entity	structural molecule activity;catalytic activity;binding	--	--
Phosphoenolpyruvate carboxykinase (GTP) OS=Fasciola gigantica OX=46835 GN=FGIG_03867 PE=3 SV=1	F.gigantica	tr|A0A504YUP2|A0A504YUP2_FASGI	40	40	66	550	61415.2	metabolic process	cellular anatomical entity	binding;catalytic activity	Energy production and conversion	FoxO signaling pathway; Pyruvate metabolism; Citrate cycle (TCA cycle); Glycolysis / Gluconeogenesis; Metabolic pathways
Glutamate dehydrogenase OS=Fasciola gigantica OX=46835 GN=FGIG_08468 PE=3 SV=1	F.gigantica	tr|A0A504YK79|A0A504YK79_FASGI	36	36	57.68	534	58745	metabolic process;biological regulation;multicellular organismal process;cellular process;developmental process;behavior;response to stimulus	cellular anatomical entity	binding;catalytic activity	Amino acid transport and metabolism	Necroptosis; Alanine, aspartate and glutamate metabolism; Nitrogen metabolism; Proximal tubule bicarbonate reclamation; Metabolic pathways; Arginine biosynthesis; Carbon metabolism
Thioredoxin peroxidase 1 OS=Fasciola gigantica OX=46835 GN=TPx-1 PE=2 SV=1; Thiol-specific antioxidant OS=Fasciola gigantica OX=46835 GN=FGIG_06158 PE=4 SV=1	F.gigantica	tr|C7EAA3|C7EAA3_FASGI;tr|A0A504YJL0|A0A504YJL0_FASGI	42	42	88.99	218	24632.9	--	--	--	Defense mechanisms	Peroxisome
Heat shock protein heat shock protein 90 alpha OS=Fasciola gigantica OX=46835 GN=FGIG_08056 PE=3 SV=1	F.gigantica	tr|A0A504YG42|A0A504YG42_FASGI	33	31	43.49	722	82427.7	response to stimulus;locomotion;developmental process;localization;biological regulation;reproductive process;biological adhesion;cellular process;immune system process;biological process involved in interspecies interaction between organisms	protein-containing complex;cellular anatomical entity	catalytic activity;binding;molecular function regulator	Posttranslational modification, protein turnover, chaperones	Th17 cell differentiation; Protein processing in endoplasmic reticulum; NOD-like receptor signaling pathway; Lipid and atherosclerosis; IL-17 signaling pathway; Chemical carcinogenesis - receptor activation; Estrogen signaling pathway; Pathways in cancer; Necroptosis; Prostate cancer; Salmonella infection; Fluid shear stress and atherosclerosis; PI3K-Akt signaling pathway; Antigen processing and …
Ubiquitin activating enzyme OS=Fasciola gigantica OX=46835 GN=FGIG_01883 PE=3 SV=1	F.gigantica	tr|A0A504Y452|A0A504Y452_FASGI	25	25	33.33	1077	120430	--	--	--	Inorganic ion transport and metabolism	Ubiquitin mediated proteolysis
Leucine amino peptidase OS=Fasciola gigantica OX=46835 PE=2 SV=1	F.gigantica	tr|C6KGZ9|C6KGZ9_FASGI	27	27	47.04	523	56384.1	metabolic process	cellular anatomical entity	binding;catalytic activity	Amino acid transport and metabolism	Metabolic pathways; Glutathione metabolism
Propionyl-CoA carboxylase beta chain OS=Fasciola gigantica OX=46835 GN=FGIG_01539 PE=4 SV=1	F.gigantica	tr|A0A504YAE5|A0A504YAE5_FASGI	28	28	46.92	535	58544.9	metabolic process;cellular process	protein-containing complex;cellular anatomical entity	binding;catalytic activity	Lipid transport and metabolism	Valine, leucine and isoleucine degradation; Glyoxylate and dicarboxylate metabolism; Metabolic pathways; Carbon metabolism; Propanoate metabolism
Propanoyl-CoA:carbon dioxide ligase subunit alpha OS=Fasciola gigantica OX=46835 GN=FGIG_07092 PE=4 SV=1	F.gigantica	tr|A0A504YJJ4|A0A504YJJ4_FASGI	24	24	38.13	750	82609	metabolic process;cellular process	cellular anatomical entity	catalytic activity;binding	Lipid transport and metabolism	Metabolic pathways; Carbon metabolism; Propanoate metabolism; Glyoxylate and dicarboxylate metabolism; Valine, leucine and isoleucine degradation
6-phosphogluconate dehydrogenase, decarboxylating OS=Fasciola gigantica OX=46835 GN=FGIG_04067 PE=3 SV=1	F.gigantica	tr|A0A504Z133|A0A504Z133_FASGI	24	24	62.42	495	54361.1	cellular process;metabolic process	cellular anatomical entity	catalytic activity;binding	Carbohydrate transport and metabolism	Pentose phosphate pathway; Metabolic pathways; Carbon metabolism; Glutathione metabolism
Alpha-1,4 glucan phosphorylase OS=Fasciola gigantica OX=46835 GN=FGIG_01694 PE=3 SV=1	F.gigantica	tr|A0A504YK53|A0A504YK53_FASGI	22	22	31.55	840	96630.7	biological regulation;metabolic process;cellular process	cellular anatomical entity	catalytic activity;binding	Carbohydrate transport and metabolism	Starch and sucrose metabolism; Metabolic pathways
Severin OS=Fasciola gigantica OX=46835 GN=FGIG_09162 PE=4 SV=1	F.gigantica	tr|A0A504Z761|A0A504Z761_FASGI	24	24	56.46	379	43100.3	--	--	--	--	--
Heat shock protein 70 OS=Fasciola hepatica OX=6192 GN=HSP70 PE=2 SV=1	F.gigantica	tr|B1NI98|B1NI98_FASHE	22	22	30.7	645	70752.1	localization;developmental process;cellular process;metabolic process;biological regulation;growth	protein-containing complex;cellular anatomical entity	catalytic activity;binding	Posttranslational modification, protein turnover, chaperones	Endocytosis; Spliceosome; Protein processing in endoplasmic reticulum
Oxoglutarate dehydrogenase (succinyl-transferring) OS=Fasciola gigantica OX=46835 GN=FGIG_04989 PE=3 SV=1	F.gigantica	tr|A0A504Z421|A0A504Z421_FASGI	22	22	26.28	1054	119538	locomotion;developmental process;cellular process;metabolic process;multicellular organismal process	cellular anatomical entity;protein-containing complex	catalytic activity;binding	Energy production and conversion	Citrate cycle (TCA cycle); Metabolic pathways; Carbon metabolism
Malic enzyme OS=Fasciola gigantica OX=46835 GN=FGIG_09437 PE=3 SV=1	F.gigantica	tr|A0A504YH77|A0A504YH77_FASGI	22	22	50.86	584	63743.6	biological regulation;metabolic process;cellular process;response to stimulus	cellular anatomical entity	binding;catalytic activity	Energy production and conversion	Pyruvate metabolism; Carbon metabolism; Metabolic pathways
Glutathione S-transferase sigma class OS=Fasciola gigantica OX=46835 PE=2 SV=1	F.gigantica	tr|K7Z2A9|K7Z2A9_FASGI	22	22	73.93	211	24595.3	--	--	catalytic activity	--	Arachidonic acid metabolism; Glutathione metabolism; Metabolic pathways; Metabolism of xenobiotics by cytochrome P450; Drug metabolism - cytochrome P450
Severin OS=Fasciola gigantica OX=46835 GN=FGIG_02947 PE=4 SV=1	F.gigantica	tr|A0A504YFI9|A0A504YFI9_FASGI	24	24	55.53	407	47394.3	--	--	--	--	--
Glyceraldehyde-3-phosphate dehydrogenase OS=Fasciola gigantica OX=46835 GN=FGIG_06798 PE=3 SV=1	F.gigantica	tr|A0A504YCL4|A0A504YCL4_FASGI	24	24	62.31	337	36542.6	metabolic process;cellular process	--	binding;catalytic activity	Carbohydrate transport and metabolism	Glycolysis / Gluconeogenesis; Carbon metabolism; Biosynthesis of amino acids; Metabolic pathways; Salmonella infection
Actin alpha cardiac muscle 1 OS=Fasciola gigantica OX=46835 GN=FGIG_00115 PE=3 SV=1	F.gigantica	tr|A0A504YKQ2|A0A504YKQ2_FASGI	26	9	61.7	376	41771.4	multicellular organismal process;localization;cellular process;developmental process;growth;reproductive process;locomotion	cellular anatomical entity	binding;structural molecule activity	Cytoskeleton	Apoptosis; Focal adhesion; Salmonella infection; Regulation of actin cytoskeleton; Tight junction; Phagosome; Adherens junction
Multi-domain cystatin OS=Fasciola gigantica OX=46835 GN=MDC PE=2 SV=1	F.gigantica	tr|A0A097GX18|A0A097GX18_FASGI	18	3	14.91	1489	170946	biological regulation	--	molecular function regulator	--	--
Alpha-actinin isoform B (Fragment) OS=Fasciola gigantica OX=46835 GN=FGIG_09027 PE=4 SV=1	F.gigantica	tr|A0A504Y787|A0A504Y787_FASGI	22	22	58.19	342	39289.7	response to stimulus;cellular process;localization;biological regulation	protein-containing complex;cellular anatomical entity	transcription regulator activity;binding	--	--
Alanine transaminase OS=Fasciola gigantica OX=46835 GN=FGIG_03447 PE=3 SV=1	F.gigantica	tr|A0A504YJK4|A0A504YJK4_FASGI	22	22	57.4	500	55531.7	cellular process;metabolic process;biological regulation	cellular anatomical entity	catalytic activity;binding	Amino acid transport and metabolism	2-Oxocarboxylic acid metabolism; Alanine, aspartate and glutamate metabolism; Arginine biosynthesis; Carbon metabolism; Biosynthesis of amino acids; Metabolic pathways
Sarcoplasmic calcium-binding protein OS=Fasciola gigantica OX=46835 GN=FGIG_07128 PE=4 SV=1	F.gigantica	tr|A0A504YGP8|A0A504YGP8_FASGI	21	21	60.68	384	44814.8	--	--	binding	--	--
14-3-3 protein OS=Fasciola gigantica OX=46835 PE=2 SV=1	F.gigantica	tr|Q5FX78|Q5FX78_FASGI	20	12	66.67	252	28741.4	biological regulation;cellular process;localization;biological adhesion;response to stimulus	protein-containing complex;cellular anatomical entity	binding;catalytic activity	--	Viral carcinogenesis; Hepatitis B; Cell cycle; Oocyte meiosis; Hepatitis C; PI3K-Akt signaling pathway; Hippo signaling pathway
Protein disulfide-isomerase OS=Fasciola gigantica OX=46835 GN=FGIG_01161 PE=3 SV=1	F.gigantica	tr|A0A504Z0Y0|A0A504Z0Y0_FASGI	17	17	39.88	489	55181.4	biological regulation;cellular process;response to stimulus	protein-containing complex;cellular anatomical entity	binding;catalytic activity	Posttranslational modification, protein turnover, chaperones	Protein processing in endoplasmic reticulum
Glutathione transferase OS=Fasciola gigantica OX=46835 GN=gst-1 PE=2 SV=1	F.gigantica	tr|Q9XYL9|Q9XYL9_FASGI	17	16	66.51	218	25337	--	--	--	--	Chemical carcinogenesis - reactive oxygen species; Metabolism of xenobiotics by cytochrome P450; Fluid shear stress and atherosclerosis; Platinum drug resistance; Drug metabolism - cytochrome P450; Hepatocellular carcinoma; Drug metabolism - other enzymes; Glutathione metabolism; Chemical carcinogenesis - receptor activation; Chemical carcinogenesis - DNA adducts; Pathways in cancer; Metabolic pa…
SERPIN domain-containing protein OS=Fasciola gigantica OX=46835 GN=FGIG_04537 PE=3 SV=1	F.gigantica	tr|A0A504Y562|A0A504Y562_FASGI	17	17	38.27	358	39709.2	--	--	--	Posttranslational modification, protein turnover, chaperones	--
Malate dehydrogenase OS=Fasciola gigantica OX=46835 GN=FGIG_08365 PE=3 SV=1	F.gigantica	tr|A0A504YCA6|A0A504YCA6_FASGI	17	17	38.11	328	36037.6	response to stimulus;cellular process;metabolic process;biological regulation	cellular anatomical entity	catalytic activity	Energy production and conversion	Carbon metabolism; Metabolic pathways; Citrate cycle (TCA cycle); Cysteine and methionine metabolism; Glyoxylate and dicarboxylate metabolism; Pyruvate metabolism
Fructose-bisphosphatase (Fragment) OS=Fasciola gigantica OX=46835 GN=FGIG_04759 PE=3 SV=1	F.gigantica	tr|A0A504YWE6|A0A504YWE6_FASGI	15	6	61.83	372	40482.8	metabolic process;cellular process	--	catalytic activity;binding	Carbohydrate transport and metabolism	Glycolysis / Gluconeogenesis; Metabolic pathways; Carbon metabolism; Fructose and mannose metabolism; Pentose phosphate pathway
Peptidyl-prolyl cis-trans isomerase OS=Fasciola gigantica OX=46835 GN=FGIG_11717 PE=3 SV=1	F.gigantica	tr|A0A504YFI1|A0A504YFI1_FASGI	15	15	76.69	163	17744.2	cellular process;developmental process;biological regulation;metabolic process	cellular anatomical entity	catalytic activity;binding	Posttranslational modification, protein turnover, chaperones	--
Methylmalonyl-CoA mutase OS=Fasciola gigantica OX=46835 GN=FGIG_08857 PE=3 SV=1	F.gigantica	tr|A0A504YZU3|A0A504YZU3_FASGI	14	14	24.53	742	81940.9	multicellular organismal process;metabolic process;cellular process	cellular anatomical entity	binding;catalytic activity	--	Glyoxylate and dicarboxylate metabolism; Valine, leucine and isoleucine degradation; Metabolic pathways; Propanoate metabolism; Carbon metabolism
Uncharacterized protein OS=Fasciola gigantica OX=46835 GN=FGIG_08354 PE=4 SV=1	F.gigantica	tr|A0A504ZB58|A0A504ZB58_FASGI	14	14	61.4	228	26436.2	--	--	--	--	--
Uncharacterized protein OS=Fasciola gigantica OX=46835 GN=FGIG_02003 PE=4 SV=1	F.gigantica	tr|A0A504YJQ4|A0A504YJQ4_FASGI	15	15	11.15	1605	182663	--	--	--	--	--
Branched-chain-amino-acid aminotransferase OS=Fasciola gigantica OX=46835 GN=FGIG_02920 PE=3 SV=1	F.gigantica	tr|A0A504Z6I4|A0A504Z6I4_FASGI	14	14	45.22	387	43627	cellular process;localization;metabolic process;biological regulation	cellular anatomical entity	catalytic activity	Coenzyme transport and metabolism;Amino acid transport and metabolism	2-Oxocarboxylic acid metabolism; Pantothenate and CoA biosynthesis; Cysteine and methionine metabolism; Biosynthesis of cofactors; Metabolic pathways; Valine, leucine and isoleucine degradation; Valine, leucine and isoleucine biosynthesis; Biosynthesis of amino acids
Dynein heavy chain 1 cytosolic OS=Fasciola gigantica OX=46835 GN=FGIG_00108 PE=3 SV=1	F.gigantica	tr|A0A504YKS2|A0A504YKS2_FASGI	13	13	3.52	4744	541069	localization;cellular process;immune system process	protein-containing complex;cellular anatomical entity	ATP-dependent activity;catalytic activity;binding;cytoskeletal motor activity	--	Salmonella infection; Vasopressin-regulated water reabsorption; Phagosome
Glutathione transferase OS=Fasciola gigantica OX=46835 GN=FGIG_08719 PE=3 SV=1	F.gigantica	tr|A0A504YW63|A0A504YW63_FASGI	13	13	36.42	313	35968.5	--	--	--	--	Drug metabolism - other enzymes; Metabolic pathways; Pathways in cancer; Chemical carcinogenesis - DNA adducts; Chemical carcinogenesis - receptor activation; Glutathione metabolism; Platinum drug resistance; Fluid shear stress and atherosclerosis; Drug metabolism - cytochrome P450; Chemical carcinogenesis - reactive oxygen species; Metabolism of xenobiotics by cytochrome P450; Hepatocellular car…
EGF-like domain-containing protein OS=Fasciola gigantica OX=46835 GN=FGIG_03998 PE=3 SV=1	F.gigantica	tr|A0A504YQK1|A0A504YQK1_FASGI	11	11	7.599	1987	221530	--	cellular anatomical entity	binding	--	--
Phosphoglycerate kinase OS=Fasciola gigantica OX=46835 GN=FGIG_04452 PE=3 SV=1	F.gigantica	tr|A0A504Z124|A0A504Z124_FASGI	13	13	42.41	415	44179.2	response to stimulus;locomotion;reproductive process;cellular process;metabolic process	cellular anatomical entity	binding;catalytic activity	Carbohydrate transport and metabolism	Biosynthesis of amino acids; Carbon metabolism; Metabolic pathways; Glycolysis / Gluconeogenesis
Thioredoxin-glutathione reductase 2 OS=Fasciola gigantica OX=46835 PE=2 SV=1	F.gigantica	tr|A0A0K1NZF7|A0A0K1NZF7_FASGI	12	4	33.96	639	70977.9	response to stimulus;biological regulation;metabolic process;cellular process	cellular anatomical entity	antioxidant activity;catalytic activity;binding	Energy production and conversion	Selenocompound metabolism
Glutamine synthetase OS=Fasciola gigantica OX=46835 GN=FGIG_06082 PE=3 SV=1	F.gigantica	tr|A0A504YZA2|A0A504YZA2_FASGI	11	11	23.67	490	55153.2	--	--	--	Amino acid transport and metabolism	--
Fructose-bisphosphate aldolase (Fragment) OS=Fasciola gigantica OX=46835 GN=FGIG_12193 PE=3 SV=1	F.gigantica	tr|A0A504ZAW9|A0A504ZAW9_FASGI	11	11	62.5	128	14183.3	cellular process;metabolic process	--	catalytic activity	Carbohydrate transport and metabolism	Glycolysis / Gluconeogenesis; Biosynthesis of amino acids; Carbon metabolism; Metabolic pathways; Fructose and mannose metabolism; Pentose phosphate pathway
Ezrin-moesin-radixin OS=Fasciola gigantica OX=46835 GN=FGIG_06080 PE=4 SV=1	F.gigantica	tr|A0A504ZA08|A0A504ZA08_FASGI	11	11	20.97	558	65737.2	multicellular organismal process;biological regulation;localization;cellular process;developmental process;response to stimulus	cellular anatomical entity;protein-containing complex	structural molecule activity;binding	--	--
Triosephosphate isomerase OS=Fasciola gigantica OX=46835 GN=FGIG_01767 PE=3 SV=1	F.gigantica	tr|A0A504YTK2|A0A504YTK2_FASGI	12	12	69.57	253	27794.6	cellular process;developmental process;multicellular organismal process;metabolic process	cellular anatomical entity	binding;catalytic activity	Carbohydrate transport and metabolism	Biosynthesis of amino acids; Carbon metabolism; Metabolic pathways; Inositol phosphate metabolism; Glycolysis / Gluconeogenesis; Fructose and mannose metabolism
Kynurenine---oxoglutarate transaminase OS=Fasciola gigantica OX=46835 GN=FGIG_10384 PE=4 SV=1	F.gigantica	tr|A0A504YVF1|A0A504YVF1_FASGI	11	11	36.41	368	40858.9	metabolic process;cellular process	--	binding;catalytic activity	Amino acid transport and metabolism	Metabolic pathways; Tryptophan metabolism; Cysteine and methionine metabolism; Selenocompound metabolism
Tyrosine 3-monooxygenase/tryptophan 5-monooxygenase activation protein theta polypeptide OS=Fasciola gigantica OX=46835 GN=FGIG_05814 PE=3 SV=1	F.gigantica	tr|A0A504YKJ3|A0A504YKJ3_FASGI	13	12	52.67	243	27494.8	--	--	--	--	Hippo signaling pathway - fly
Translation elongation factor 2 OS=Fasciola gigantica OX=46835 GN=FGIG_00796 PE=3 SV=1	F.gigantica	tr|A0A504YZD9|A0A504YZD9_FASGI	11	11	18.71	850	94616.2	cellular process;developmental process;metabolic process;multicellular organismal process;reproductive process;growth	cellular anatomical entity	translation regulator activity;binding;catalytic activity	Translation, ribosomal structure and biogenesis	--
UTP--glucose-1-phosphate uridylyltransferase OS=Fasciola gigantica OX=46835 GN=FGIG_09880 PE=3 SV=1	F.gigantica	tr|A0A504Z3Q6|A0A504Z3Q6_FASGI	14	14	36.87	358	40338.4	developmental process;cellular process;metabolic process;multicellular organismal process	cellular anatomical entity	catalytic activity;binding	Carbohydrate transport and metabolism;Coenzyme transport and metabolism	Galactose metabolism; Biosynthesis of cofactors; Starch and sucrose metabolism; Metabolic pathways; Pentose and glucuronate interconversions; Amino sugar and nucleotide sugar metabolism; Biosynthesis of nucleotide sugars
Heat shock protein 4L OS=Fasciola gigantica OX=46835 GN=FGIG_10505 PE=3 SV=1	F.gigantica	tr|A0A504YYB0|A0A504YYB0_FASGI	11	10	17.63	624	70221.6	--	cellular anatomical entity	binding	Posttranslational modification, protein turnover, chaperones	Protein processing in endoplasmic reticulum
Tubulin beta chain OS=Fasciola gigantica OX=46835 GN=FGIG_02819 PE=3 SV=1	F.gigantica	tr|A0A504YSW8|A0A504YSW8_FASGI	11	4	25.57	442	49787.9	response to stimulus;immune system process;cellular process;biological process involved in interspecies interaction between organisms	protein-containing complex;cellular anatomical entity	binding;catalytic activity;structural molecule activity	--	Phagosome; Gap junction; Salmonella infection
Paramyosin OS=Fasciola gigantica OX=46835 GN=FGIG_08997 PE=3 SV=1	F.gigantica	tr|A0A504Y9W6|A0A504Y9W6_FASGI	11	10	6.743	2002	230744	cellular process;reproductive process;biological regulation;multicellular organismal process;developmental process;localization;locomotion;response to stimulus	protein-containing complex;cellular anatomical entity	cytoskeletal motor activity;binding;catalytic activity	--	--
Spectrin beta chain OS=Fasciola gigantica OX=46835 GN=FGIG_08554 PE=3 SV=1	F.gigantica	tr|A0A504YIN4|A0A504YIN4_FASGI	11	11	6.122	2336	270020	--	--	--	--	--
Retinaldehyde binding protein OS=Fasciola gigantica OX=46835 GN=FGIG_07780 PE=4 SV=1	F.gigantica	tr|A0A504YX94|A0A504YX94_FASGI	11	11	44.78	364	41760.4	--	--	--	--	--
Glutathione transferase OS=Fasciola gigantica OX=46835 GN=FGIG_05292 PE=3 SV=1	F.gigantica	tr|A0A504YYF4|A0A504YYF4_FASGI	10	10	34.37	419	47891.8	--	--	--	Posttranslational modification, protein turnover, chaperones	--
Filamin-A OS=Fasciola gigantica OX=46835 GN=FGIG_10911 PE=3 SV=1	F.gigantica	tr|A0A504YKH3|A0A504YKH3_FASGI	10	10	8.952	1374	150062	localization;negative regulation of biological process;developmental process;cellular process;metabolic process;biological regulation	protein-containing complex;cellular anatomical entity	binding	--	--
Calponin OS=Fasciola gigantica OX=46835 GN=FGIG_01172 PE=3 SV=1	F.gigantica	tr|A0A504YK51|A0A504YK51_FASGI	12	12	34.63	361	39853	cellular process	--	binding	--	--
Leukotriene A-4 hydrolase OS=Fasciola gigantica OX=46835 GN=FGIG_00782 PE=3 SV=1	F.gigantica	tr|A0A504X7M0|A0A504X7M0_FASGI	9	9	25.29	680	77608.4	response to stimulus;cellular process;developmental process;metabolic process	cellular anatomical entity	catalytic activity;binding	Amino acid transport and metabolism	Arachidonic acid metabolism; Metabolic pathways
Ferritin OS=Fasciola gigantica OX=46835 GN=FGIG_03790 PE=3 SV=1	F.gigantica	tr|A0A504YQY7|A0A504YQY7_FASGI	11	11	29.52	210	24370.1	--	--	--	--	--
Peptidase D OS=Fasciola gigantica OX=46835 GN=FGIG_12081 PE=4 SV=1	F.gigantica	tr|A0A504XV93|A0A504XV93_FASGI	9	9	31.6	405	45328.6	metabolic process;cellular process	cellular anatomical entity	binding;catalytic activity	Amino acid transport and metabolism	--
Aspartate aminotransferase OS=Fasciola gigantica OX=46835 GN=FGIG_08565 PE=3 SV=1	F.gigantica	tr|A0A504Y7H3|A0A504Y7H3_FASGI	9	9	26.63	398	44493.3	localization;cellular process;metabolic process	cellular anatomical entity	catalytic activity;binding	Amino acid transport and metabolism	Phenylalanine, tyrosine and tryptophan biosynthesis; Tyrosine metabolism; Carbon metabolism; Biosynthesis of amino acids; Arginine and proline metabolism; Alanine, aspartate and glutamate metabolism; Cysteine and methionine metabolism; 2-Oxocarboxylic acid metabolism; Metabolic pathways; Arginine biosynthesis; Phenylalanine metabolism
Malate dehydrogenase OS=Fasciola gigantica OX=46835 GN=FGIG_05200 PE=3 SV=1	F.gigantica	tr|A0A504Z4D3|A0A504Z4D3_FASGI	9	9	32.51	363	39066.8	--	--	--	Energy production and conversion	Pyruvate metabolism; Glyoxylate and dicarboxylate metabolism; Cysteine and methionine metabolism; Citrate cycle (TCA cycle); Metabolic pathways; Carbon metabolism
ATP binding cassette subfamily B MDR TAP OS=Fasciola gigantica OX=46835 GN=FGIG_05048 PE=4 SV=1	F.gigantica	tr|A0A504YNZ1|A0A504YNZ1_FASGI	10	10	11.43	1260	139481	--	--	--	--	ABC transporters
Tetratricopeptide repeat protein 39B OS=Fasciola gigantica OX=46835 GN=FGIG_08861 PE=4 SV=1	F.gigantica	tr|A0A504Z3T9|A0A504Z3T9_FASGI	10	10	15.21	677	77736	--	--	--	--	--
Acetyl-CoA deacylase OS=Fasciola gigantica OX=46835 GN=FGIG_02713 PE=3 SV=1	F.gigantica	tr|A0A504YC54|A0A504YC54_FASGI	11	11	34.31	478	52470.7	cellular process;metabolic process	cellular anatomical entity	catalytic activity	Energy production and conversion	--
Alpha-aminoadipic semialdehyde synthase mitochondrial OS=Fasciola gigantica OX=46835 GN=FGIG_10732 PE=4 SV=1	F.gigantica	tr|A0A504Z3L9|A0A504Z3L9_FASGI	9	9	48.37	246	27863.8	--	--	--	Amino acid transport and metabolism	Lysine degradation; Metabolic pathways
Cathepsin L1 OS=Fasciola gigantica OX=46835 GN=ctl1 PE=2 SV=1	F.gigantica	tr|H6WYY7|H6WYY7_FASGI	9	7	32.21	326	36785.1	metabolic process	cellular anatomical entity	catalytic activity	Function unknown	Lysosome; Phagosome; Autophagy - animal
Annexin OS=Fasciola gigantica OX=46835 GN=FGIG_12159 PE=3 SV=1	F.gigantica	tr|A0A504Y587|A0A504Y587_FASGI	10	10	44.11	263	29408.4	cellular process	cellular anatomical entity	binding	--	--
Aspartate aminotransferase OS=Fasciola gigantica OX=46835 GN=FGIG_04765 PE=3 SV=1	F.gigantica	tr|A0A504YL02|A0A504YL02_FASGI	10	10	24.38	406	45473.2	cellular process;biological regulation;metabolic process;response to stimulus	cellular anatomical entity	catalytic activity;binding	Amino acid transport and metabolism	Alanine, aspartate and glutamate metabolism; Cysteine and methionine metabolism; 2-Oxocarboxylic acid metabolism; Metabolic pathways; Arginine biosynthesis; Phenylalanine metabolism; Phenylalanine, tyrosine and tryptophan biosynthesis; Tyrosine metabolism; Biosynthesis of amino acids; Carbon metabolism; Arginine and proline metabolism
Phosphoglucomutase (alpha-D-glucose-1,6-bisphosphate-dependent) OS=Fasciola gigantica OX=46835 GN=FGIG_07540 PE=3 SV=1	F.gigantica	tr|A0A504Z4F7|A0A504Z4F7_FASGI	9	9	20.38	579	63666	--	--	--	Carbohydrate transport and metabolism	Biosynthesis of nucleotide sugars; Purine metabolism; Metabolic pathways; Glycolysis / Gluconeogenesis; Galactose metabolism; Pentose phosphate pathway; Amino sugar and nucleotide sugar metabolism; Starch and sucrose metabolism
Glycogen debranching enzyme OS=Fasciola gigantica OX=46835 GN=FGIG_06646 PE=4 SV=1	F.gigantica	tr|A0A504YUV6|A0A504YUV6_FASGI	7	7	5.865	1654	186198	metabolic process;cellular process;response to stimulus	cellular anatomical entity	catalytic activity;binding	Carbohydrate transport and metabolism	Starch and sucrose metabolism; Metabolic pathways
GST C-terminal domain-containing protein OS=Fasciola gigantica OX=46835 GN=FGIG_08402 PE=4 SV=1	F.gigantica	tr|A0A504YWR3|A0A504YWR3_FASGI	8	8	68.29	164	18667.1	--	--	--	--	--
Gill-specific calpain OS=Fasciola gigantica OX=46835 GN=FGIG_01291 PE=3 SV=1	F.gigantica	tr|A0A504YWV2|A0A504YWV2_FASGI	8	8	14.82	722	83500.7	--	cellular anatomical entity	catalytic activity;binding	Defense mechanisms	--
Inorganic diphosphatase OS=Fasciola gigantica OX=46835 GN=FGIG_04581 PE=3 SV=1	F.gigantica	tr|A0A504YH45|A0A504YH45_FASGI	7	7	32.3	291	32666.9	cellular process;metabolic process	cellular anatomical entity	catalytic activity	Energy production and conversion	--
Transgelin OS=Fasciola gigantica OX=46835 GN=FGIG_02273 PE=3 SV=1	F.gigantica	tr|A0A504YCY9|A0A504YCY9_FASGI	9	9	37.33	217	24210.6	--	--	binding	--	--
Uncharacterized protein (Fragment) OS=Fasciola gigantica OX=46835 GN=FGIG_02021 PE=4 SV=1	F.gigantica	tr|A0A504Z3S9|A0A504Z3S9_FASGI	9	9	17.36	726	78466.1	cellular process	--	--	--	--
Fructose-bisphosphate aldolase OS=Fasciola gigantica OX=46835 GN=FGIG_12192 PE=3 SV=1	F.gigantica	tr|A0A504Z4Y4|A0A504Z4Y4_FASGI	8	8	44.28	201	21259.3	metabolic process;cellular process	--	catalytic activity	Carbohydrate transport and metabolism	Fructose and mannose metabolism; Pentose phosphate pathway; Glycolysis / Gluconeogenesis; Metabolic pathways; Carbon metabolism; Biosynthesis of amino acids
Protein disulfide-isomerase OS=Fasciola gigantica OX=46835 GN=FGIG_07376 PE=3 SV=1	F.gigantica	tr|A0A504YYD5|A0A504YYD5_FASGI	8	8	17.77	484	54811.9	cellular process	--	--	Posttranslational modification, protein turnover, chaperones	Protein processing in endoplasmic reticulum
14-3-3 protein zeta/delta OS=Fasciola gigantica OX=46835 GN=FGIG_12079 PE=3 SV=1	F.gigantica	tr|A0A504YNS3|A0A504YNS3_FASGI	9	8	79.13	115	13194.5	--	--	catalytic activity;binding	--	--
Glycine hydroxymethyltransferase (Fragment) OS=Fasciola gigantica OX=46835 GN=FGIG_08269 PE=3 SV=1	F.gigantica	tr|A0A504YE73|A0A504YE73_FASGI	8	8	27.4	354	38628.7	metabolic process;cellular process;response to stimulus	cellular anatomical entity;protein-containing complex	catalytic activity;binding	Amino acid transport and metabolism	Glycine, serine and threonine metabolism; Carbon metabolism; Biosynthesis of amino acids; Biosynthesis of cofactors; Metabolic pathways; One carbon pool by folate; Glyoxylate and dicarboxylate metabolism
Staphylococcal nuclease domain-containing protein OS=Fasciola gigantica OX=46835 GN=FGIG_08996 PE=4 SV=1	F.gigantica	tr|A0A504ZAB4|A0A504ZAB4_FASGI	8	8	10.1	1040	115401	metabolic process;biological regulation;developmental process;cellular process	cellular anatomical entity	binding	--	--
Filamin-A OS=Fasciola gigantica OX=46835 GN=FGIG_01162 PE=3 SV=1	F.gigantica	tr|A0A504ZB76|A0A504ZB76_FASGI	7	7	3.293	2490	269334	--	--	--	--	--
Dipeptidyl peptidase OS=Fasciola gigantica OX=46835 GN=FGIG_09152 PE=4 SV=1	F.gigantica	tr|A0A504Y6F5|A0A504Y6F5_FASGI	8	8	18.86	615	69059.9	metabolic process	cellular anatomical entity	binding;catalytic activity	--	--
Heat shock 70 kDa protein 4 OS=Fasciola gigantica OX=46835 GN=FGIG_04814 PE=3 SV=1	F.gigantica	tr|A0A504YBY0|A0A504YBY0_FASGI	8	7	12.34	778	87732.1	response to stimulus;biological regulation;developmental process	cellular anatomical entity	binding	Posttranslational modification, protein turnover, chaperones	--
Myoglobin 1 OS=Fasciola gigantica OX=46835 GN=FGIG_04909 PE=3 SV=1	F.gigantica	tr|A0A504YY71|A0A504YY71_FASGI	8	8	51.01	149	16656.1	--	--	binding	--	--
Phosphoglucomutase OS=Fasciola gigantica OX=46835 GN=FGIG_00594 PE=3 SV=1	F.gigantica	tr|A0A504Z3Z6|A0A504Z3Z6_FASGI	8	8	20.67	600	68129.9	metabolic process;cellular process	cellular anatomical entity	binding;catalytic activity	Carbohydrate transport and metabolism	Biosynthesis of nucleotide sugars; Purine metabolism; Glycolysis / Gluconeogenesis; Galactose metabolism; Metabolic pathways; Amino sugar and nucleotide sugar metabolism; Pentose phosphate pathway; Starch and sucrose metabolism
Myoglobin OS=Fasciola gigantica OX=46835 GN=FGIG_07874 PE=4 SV=1	F.gigantica	tr|A0A504YI87|A0A504YI87_FASGI	7	4	59.2	125	14368.6	--	--	--	--	--
Rab GDP dissociation inhibitor beta OS=Fasciola gigantica OX=46835 GN=FGIG_11560 PE=3 SV=1	F.gigantica	tr|A0A504YD60|A0A504YD60_FASGI	7	6	25.16	306	35233.5	--	--	--	--	--
Adenosylhomocysteinase OS=Fasciola gigantica OX=46835 GN=FGIG_02481 PE=3 SV=1	F.gigantica	tr|A0A504YY90|A0A504YY90_FASGI	7	7	23.84	432	48021.7	cellular process;metabolic process	cellular anatomical entity	catalytic activity;binding	Coenzyme transport and metabolism	Metabolic pathways; Cysteine and methionine metabolism
SERPIN domain-containing protein OS=Fasciola gigantica OX=46835 GN=FGIG_08940 PE=3 SV=1	F.gigantica	tr|A0A504X338|A0A504X338_FASGI	7	7	37.87	235	26024.8	--	--	molecular function regulator	Posttranslational modification, protein turnover, chaperones	--
Ferritin OS=Fasciola gigantica OX=46835 GN=FGIG_03791 PE=3 SV=1	F.gigantica	tr|A0A504YTH3|A0A504YTH3_FASGI	7	7	41.74	218	25133.6	--	--	--	--	Mineral absorption; Ferroptosis; Necroptosis
Phosphoglycerate mutase OS=Fasciola gigantica OX=46835 GN=FGIG_08259 PE=3 SV=1	F.gigantica	tr|A0A504YRA6|A0A504YRA6_FASGI	8	8	40.64	251	28213.3	--	--	--	Carbohydrate transport and metabolism	Metabolic pathways; Biosynthesis of amino acids; Glycine, serine and threonine metabolism; Carbon metabolism; Glycolysis / Gluconeogenesis
Putative Cofilin actophorin OS=Fasciola gigantica OX=46835 GN=FGIG_02872 PE=3 SV=1	F.gigantica	tr|A0A504Z805|A0A504Z805_FASGI	6	6	41.48	135	15646.9	--	--	--	--	--
Dynein light chain OS=Fasciola gigantica OX=46835 GN=FGIG_10861 PE=3 SV=1	F.gigantica	tr|A0A504YNX9|A0A504YNX9_FASGI	8	6	69.66	89	10286.5	cellular process;immune system process;reproductive process;localization;developmental process;viral process;metabolic process;biological regulation	protein-containing complex;cellular anatomical entity	molecular function regulator;binding;cytoskeletal motor activity	--	--
Tyrosine 3-monooxygenase/tryptophan 5-monooxygenase activation protein theta polypeptide OS=Fasciola gigantica OX=46835 GN=FGIG_07351 PE=3 SV=1	F.gigantica	tr|A0A504YX93|A0A504YX93_FASGI	15	7	60.71	252	28661.1	cellular process;biological adhesion;reproductive process;biological regulation;multicellular organismal process;developmental process;behavior;localization;response to stimulus	protein-containing complex;cellular anatomical entity	binding	--	Cell cycle; Longevity regulating pathway - worm; Oocyte meiosis
RNA helicase OS=Fasciola gigantica OX=46835 GN=FGIG_02516 PE=3 SV=1	F.gigantica	tr|A0A504YKU1|A0A504YKU1_FASGI	6	6	18.46	390	44118.1	cellular process;reproductive process;growth;metabolic process;biological regulation;multicellular organismal process;developmental process;localization;response to stimulus;locomotion	cellular anatomical entity;protein-containing complex	translation regulator activity;binding;ATP-dependent activity;catalytic activity	Replication, recombination and repair	--
Myophilin OS=Fasciola gigantica OX=46835 GN=FGIG_12455 PE=4 SV=1	F.gigantica	tr|A0A504YDV3|A0A504YDV3_FASGI	7	7	72.67	161	17935.7	--	--	--	--	--
BAR domain-containing protein OS=Fasciola gigantica OX=46835 GN=FGIG_03778 PE=4 SV=1	F.gigantica	tr|A0A504YSN0|A0A504YSN0_FASGI	6	6	35.85	212	24428.7	--	--	--	--	Endocytosis; Autophagy - animal
Uncharacterized protein OS=Fasciola gigantica OX=46835 GN=FGIG_04800 PE=4 SV=1	F.gigantica	tr|A0A504YVL5|A0A504YVL5_FASGI	7	7	40.64	219	24733.7	--	--	--	--	--
Histone H4 OS=Fasciola gigantica OX=46835 GN=FGIG_09044 PE=3 SV=1	F.gigantica	tr|A0A504Z5J4|A0A504Z5J4_FASGI	7	7	49.51	103	11367.3	response to stimulus;cellular process;metabolic process;biological regulation;multicellular organismal process	cellular anatomical entity;protein-containing complex	binding	--	--
Nardilysin OS=Fasciola gigantica OX=46835 GN=FGIG_05052 PE=4 SV=1	F.gigantica	tr|A0A504YB95|A0A504YB95_FASGI	7	7	7.648	1033	117177	metabolic process	--	catalytic activity	Posttranslational modification, protein turnover, chaperones	--
Adenylyl cyclase-associated protein OS=Fasciola gigantica OX=46835 GN=FGIG_10041 PE=3 SV=1	F.gigantica	tr|A0A504YCH2|A0A504YCH2_FASGI	6	6	22.96	479	52879	cellular process;developmental process;biological regulation;multicellular organismal process;locomotion	cellular anatomical entity	catalytic activity;binding	--	--
Programmed cell death 6-interacting protein OS=Fasciola gigantica OX=46835 GN=FGIG_11342 PE=4 SV=1	F.gigantica	tr|A0A504YU64|A0A504YU64_FASGI	6	6	24.77	214	23686.8	--	--	--	--	Endocytosis
Myoferlin OS=Fasciola gigantica OX=46835 GN=FGIG_11155 PE=4 SV=1	F.gigantica	tr|A0A504ZB63|A0A504ZB63_FASGI	7	6	13.83	687	79044.1	--	--	--	--	--
Uncharacterized protein OS=Fasciola gigantica OX=46835 GN=FGIG_05766 PE=4 SV=1	F.gigantica	tr|A0A504YNV9|A0A504YNV9_FASGI	7	7	18.69	487	53801	--	--	--	--	--
Karyopherin (Importin) beta 3 OS=Fasciola gigantica OX=46835 GN=FGIG_01937 PE=4 SV=1	F.gigantica	tr|A0A504YZP6|A0A504YZP6_FASGI	5	5	7.869	1131	125543	response to stimulus;localization;cellular process;biological regulation	protein-containing complex;cellular anatomical entity	binding;molecular function regulator	--	Nucleocytoplasmic transport
Threonine ammonia-lyase OS=Fasciola gigantica OX=46835 GN=FGIG_07415 PE=4 SV=1	F.gigantica	tr|A0A504YJT7|A0A504YJT7_FASGI	7	7	23.96	455	48780.3	metabolic process;cellular process	cellular anatomical entity	binding;catalytic activity	Amino acid transport and metabolism;General function prediction only	Valine, leucine and isoleucine biosynthesis; Biosynthesis of amino acids; Glycine, serine and threonine metabolism; Carbon metabolism; Metabolic pathways
Spectrin alpha chain non-erythrocytic OS=Fasciola gigantica OX=46835 GN=FGIG_09949 PE=3 SV=1	F.gigantica	tr|A0A504Y9H5|A0A504Y9H5_FASGI	8	8	3.057	2421	281504	reproductive process;cellular process;developmental process;signaling;localization;biological regulation	protein-containing complex;cellular anatomical entity	molecular function regulator;structural molecule activity;binding	--	--
ATP-binding cassette sub-family D member 4 OS=Fasciola gigantica OX=46835 GN=FGIG_07870 PE=4 SV=1	F.gigantica	tr|A0A504YAS3|A0A504YAS3_FASGI	6	6	11.23	677	76066.7	--	cellular anatomical entity	--	General function prediction only	Peroxisome; ABC transporters
Carbonyl reductase (NADPH) OS=Fasciola gigantica OX=46835 GN=FGIG_01635 PE=4 SV=1	F.gigantica	tr|A0A504YXL4|A0A504YXL4_FASGI	6	6	28.98	283	31372.6	--	--	catalytic activity	Lipid transport and metabolism;General function prediction only	Arachidonic acid metabolism; Metabolic pathways; Folate biosynthesis; Metabolism of xenobiotics by cytochrome P450
Rab GDP dissociation inhibitor OS=Fasciola gigantica OX=46835 GN=FGIG_12043 PE=3 SV=1	F.gigantica	tr|A0A504YZV0|A0A504YZV0_FASGI	7	6	25.25	408	46701.5	--	--	--	--	--
Retinaldehyde dehydrogenase type 2 OS=Fasciola gigantica OX=46835 GN=FGIG_01497 PE=3 SV=1	F.gigantica	tr|A0A504YF29|A0A504YF29_FASGI	5	5	14.55	495	53275.9	--	--	catalytic activity	Lipid transport and metabolism	--
Importin subunit beta OS=Fasciola gigantica OX=46835 GN=FGIG_03686 PE=4 SV=1	F.gigantica	tr|A0A504Z8R2|A0A504Z8R2_FASGI	5	5	7.991	926	100897	localization;cellular process;viral process;biological process involved in interspecies interaction between organisms;multi-organism process;metabolic process;biological regulation	protein-containing complex;cellular anatomical entity	binding	--	Nucleocytoplasmic transport
T-complex protein 1 subunit gamma OS=Fasciola gigantica OX=46835 GN=FGIG_02826 PE=3 SV=1	F.gigantica	tr|A0A504YS00|A0A504YS00_FASGI	5	5	10.99	546	59636.7	reproductive process;cellular process;developmental process;localization;biological regulation	protein-containing complex;cellular anatomical entity	binding	Posttranslational modification, protein turnover, chaperones	--
Aminomethyltransferase OS=Fasciola gigantica OX=46835 GN=FGIG_10625 PE=3 SV=1	F.gigantica	tr|A0A504YTK5|A0A504YTK5_FASGI	5	5	18.4	424	46816.3	cellular process;metabolic process	cellular anatomical entity	catalytic activity	Amino acid transport and metabolism	Metabolic pathways; Glycine, serine and threonine metabolism; Carbon metabolism; One carbon pool by folate; Glyoxylate and dicarboxylate metabolism
Coproporphyrinogen oxidase OS=Fasciola gigantica OX=46835 GN=FGIG_09992 PE=3 SV=1	F.gigantica	tr|A0A504YY15|A0A504YY15_FASGI	6	6	17.23	412	47799.3	--	--	--	Coenzyme transport and metabolism	Porphyrin and chlorophyll metabolism; Metabolic pathways; Biosynthesis of cofactors
Dysferlin (Fragment) OS=Fasciola gigantica OX=46835 GN=FGIG_10412 PE=4 SV=1	F.gigantica	tr|A0A504Z0Y5|A0A504Z0Y5_FASGI	5	5	10.53	655	72987.9	multicellular organismal process;biological regulation;cellular process;response to stimulus	cellular anatomical entity	binding	--	--
ADP-ribosylation factor OS=Fasciola gigantica OX=46835 GN=FGIG_08587 PE=3 SV=1	F.gigantica	tr|A0A504Y7N1|A0A504Y7N1_FASGI	6	4	51.93	181	20603.6	--	--	--	Intracellular trafficking, secretion, and vesicular transport;General function prediction only	Endocytosis
Fructose-bisphosphate aldolase OS=Fasciola gigantica OX=46835 GN=FGIG_07052 PE=3 SV=1	F.gigantica	tr|A0A504YE45|A0A504YE45_FASGI	10	10	25.17	441	48393.1	cellular process;metabolic process	--	catalytic activity	Carbohydrate transport and metabolism	Glycolysis / Gluconeogenesis; Metabolic pathways; Carbon metabolism; Biosynthesis of amino acids; Fructose and mannose metabolism; Pentose phosphate pathway
Serine/threonine protein phosphatase 2A regulatory subunit OS=Fasciola gigantica OX=46835 GN=FGIG_06791 PE=3 SV=1	F.gigantica	tr|A0A504YXZ1|A0A504YXZ1_FASGI	6	6	15.48	478	55791.2	cellular process;biological regulation	protein-containing complex;cellular anatomical entity	binding;molecular function regulator	--	mRNA surveillance pathway
Tubulin alpha chain OS=Fasciola gigantica OX=46835 GN=FGIG_12230 PE=3 SV=1	F.gigantica	tr|A0A504YVW1|A0A504YVW1_FASGI	8	7	27.39	387	43192	cellular process	--	--	--	Phagosome; Tight junction; Gap junction; Salmonella infection; Apoptosis
Translation elongation factor 1-alpha OS=Fasciola gigantica OX=46835 GN=FGIG_10368 PE=4 SV=1	F.gigantica	tr|A0A504XH41|A0A504XH41_FASGI	6	6	21.54	246	27649.7	--	--	--	Translation, ribosomal structure and biogenesis	Nucleocytoplasmic transport
Clathrin heavy chain OS=Fasciola gigantica OX=46835 GN=FGIG_02390 PE=3 SV=1	F.gigantica	tr|A0A504YEU6|A0A504YEU6_FASGI	5	5	3.302	1726	196045	developmental process;cellular process;immune system process;localization;metabolic process;biological regulation	protein-containing complex;cellular anatomical entity	binding;structural molecule activity	--	Lysosome; Endocytosis
Uncharacterized protein OS=Fasciola gigantica OX=46835 GN=FGIG_09570 PE=4 SV=1	F.gigantica	tr|A0A504YEF3|A0A504YEF3_FASGI	9	9	42.53	221	25942.6	--	--	--	--	--
Actin alpha skeletal muscle protein OS=Fasciola gigantica OX=46835 GN=FGIG_12390 PE=4 SV=1	F.gigantica	tr|A0A504YPI2|A0A504YPI2_FASGI	15	6	92.47	93	10447.2	--	--	--	Cytoskeleton	--
cAMP-dependent protein kinase catalytic subunit alpha OS=Fasciola gigantica OX=46835 GN=FGIG_06125 PE=3 SV=1	F.gigantica	tr|A0A504YN48|A0A504YN48_FASGI	6	6	24.3	321	37344	multicellular organismal process;metabolic process;biological regulation;developmental process;response to stimulus;immune system process;cellular process;reproductive process	protein-containing complex;cellular anatomical entity	catalytic activity;binding	Cell wall/membrane/envelope biogenesis;Signal transduction mechanisms;Posttranslational modification, protein turnover, chaperones	Wnt signaling pathway; Autophagy - animal
Mastin OS=Fasciola gigantica OX=46835 GN=FGIG_00425 PE=4 SV=1	F.gigantica	tr|A0A504YAC3|A0A504YAC3_FASGI	5	5	16.4	500	56087.5	metabolic process	cellular anatomical entity	catalytic activity	Posttranslational modification, protein turnover, chaperones;Cell wall/membrane/envelope biogenesis	--
Putative Ankyrin repeat-containing OS=Fasciola gigantica OX=46835 GN=FGIG_02952 PE=4 SV=1	F.gigantica	tr|A0A504YRM7|A0A504YRM7_FASGI	6	6	9.41	712	77094.6	--	--	--	--	TGF-beta signaling pathway; mRNA surveillance pathway; Hippo signaling pathway - fly
ADP/ATP translocase OS=Fasciola gigantica OX=46835 GN=FGIG_09083 PE=3 SV=1	F.gigantica	tr|A0A504YFL1|A0A504YFL1_FASGI	5	5	14.79	311	34093.5	--	--	--	--	Cellular senescence; Calcium signaling pathway; Necroptosis
Glycogenin glucosyltransferase OS=Fasciola gigantica OX=46835 GN=FGIG_00957 PE=4 SV=1	F.gigantica	tr|A0A504Y9R7|A0A504Y9R7_FASGI	6	6	32.41	324	37270.1	metabolic process;cellular process	cellular anatomical entity	binding;catalytic activity	--	Metabolic pathways; Starch and sucrose metabolism
Ferritin OS=Fasciola gigantica OX=46835 GN=FGIG_03789 PE=3 SV=1	F.gigantica	tr|A0A504YX11|A0A504YX11_FASGI	5	5	31.42	226	26082.8	biological regulation;cellular process	--	catalytic activity;binding	--	Ferroptosis; Mineral absorption; Necroptosis
SOCS box domain-containing protein OS=Fasciola gigantica OX=46835 GN=FGIG_06104 PE=4 SV=1	F.gigantica	tr|A0A504Z5S3|A0A504Z5S3_FASGI	5	5	18.96	385	44379.7	--	--	--	--	--
Importin 7 OS=Fasciola gigantica OX=46835 GN=FGIG_06236 PE=4 SV=1	F.gigantica	tr|A0A504YMY3|A0A504YMY3_FASGI	4	4	5.242	1011	114388	multicellular organismal process;metabolic process;biological regulation;signaling;cellular process;developmental process;reproductive process	protein-containing complex;cellular anatomical entity	catalytic activity;binding	--	Nucleocytoplasmic transport
Fumarate hydratase class I anaerobic OS=Fasciola gigantica OX=46835 GN=FGIG_00729 PE=3 SV=1	F.gigantica	tr|A0A504YJH6|A0A504YJH6_FASGI	5	5	25.88	255	27877.7	--	--	--	--	Pyruvate metabolism; Citrate cycle (TCA cycle); Metabolic pathways; Carbon metabolism
Glutathione transferase OS=Fasciola gigantica OX=46835 PE=2 SV=1	F.gigantica	tr|K7YEX8|K7YEX8_FASGI	6	6	29.17	240	27473.5	cellular process;metabolic process	--	catalytic activity	Posttranslational modification, protein turnover, chaperones	--
EF-hand domain-containing protein OS=Fasciola gigantica OX=46835 GN=FGIG_10866 PE=4 SV=1	F.gigantica	tr|A0A504YSF4|A0A504YSF4_FASGI	5	5	59.57	94	10928.2	--	--	binding;catalytic activity	--	--
Uncharacterized protein OS=Fasciola gigantica OX=46835 GN=FGIG_12601 PE=4 SV=1	F.gigantica	tr|A0A504YPA7|A0A504YPA7_FASGI	4	4	11.2	616	71024.9	--	--	--	--	--
Glucose-6-phosphate 1-dehydrogenase OS=Fasciola gigantica OX=46835 GN=FGIG_08112 PE=4 SV=1	F.gigantica	tr|A0A504Y6U9|A0A504Y6U9_FASGI	5	5	18.79	314	36262.4	response to stimulus;developmental process;cellular process;biological regulation;metabolic process;multicellular organismal process	cellular anatomical entity	binding;catalytic activity	Carbohydrate transport and metabolism	Metabolic pathways; Carbon metabolism; Glutathione metabolism; Pentose phosphate pathway
Leucine aminopeptidase OS=Fasciola gigantica OX=46835 GN=FGIG_00410 PE=3 SV=1	F.gigantica	tr|A0A504YWR8|A0A504YWR8_FASGI	5	5	19.33	238	26002.3	--	--	--	Amino acid transport and metabolism	Glutathione metabolism; Metabolic pathways
Uncharacterized protein OS=Fasciola gigantica OX=46835 GN=FGIG_12185 PE=4 SV=1	F.gigantica	tr|A0A504YDR8|A0A504YDR8_FASGI	5	5	38.14	118	12778.1	--	--	--	--	--
Polyubiquitin-B OS=Fasciola gigantica OX=46835 GN=FGIG_03366 PE=4 SV=1; Polyubiquitin OS=Fasciola gigantica OX=46835 GN=FGIG_08506 PE=4 SV=1	F.gigantica	tr|A0A504YU10|A0A504YU10_FASGI;tr|A0A504YHV3|A0A504YHV3_FASGI	5	5	49.58	119	13227.8	reproductive process;cellular process;immune system process;multi-organism process;response to stimulus;viral process;developmental process;localization;biological regulation;metabolic process;multicellular organismal process	cellular anatomical entity	binding	Posttranslational modification, protein turnover, chaperones	Kaposi sarcoma-associated herpesvirus infection; Pathways of neurodegeneration - multiple diseases; Parkinson disease; Mitophagy - animal; Ubiquitin mediated proteolysis
Dynein light chain OS=Fasciola gigantica OX=46835 GN=FGIG_07349 PE=3 SV=1	F.gigantica	tr|A0A504YPY2|A0A504YPY2_FASGI	6	4	55.06	89	10428.8	cellular process;immune system process;reproductive process;multicellular organismal process;metabolic process;biological regulation;localization;developmental process	protein-containing complex;cellular anatomical entity	binding;cytoskeletal motor activity;catalytic activity	--	Salmonella infection
Cullin-associated NEDD8-dissociated protein 1 OS=Fasciola gigantica OX=46835 GN=FGIG_11904 PE=4 SV=1	F.gigantica	tr|A0A504YIT7|A0A504YIT7_FASGI	4	4	10.59	491	54567.9	biological regulation;metabolic process;developmental process;cellular process	cellular anatomical entity;protein-containing complex	binding	--	--
Serine/threonine-protein phosphatase OS=Fasciola gigantica OX=46835 GN=FGIG_01822 PE=3 SV=1	F.gigantica	tr|A0A504YI98|A0A504YI98_FASGI	5	5	21.07	318	36368.8	biological regulation;metabolic process;developmental process;cellular process;response to stimulus;reproductive process	cellular anatomical entity;protein-containing complex	binding;catalytic activity	--	TGF-beta signaling pathway; Autophagy - animal; mRNA surveillance pathway; Autophagy - other
Putative aminopeptidase W07G4.4 OS=Fasciola gigantica OX=46835 GN=FGIG_00411 PE=4 SV=1	F.gigantica	tr|A0A504YZM7|A0A504YZM7_FASGI	4	4	29.85	134	15181.5	--	--	--	--	Glutathione metabolism; Metabolic pathways
CCT-alpha OS=Fasciola gigantica OX=46835 GN=FGIG_10994 PE=3 SV=1	F.gigantica	tr|A0A504YGF9|A0A504YGF9_FASGI	4	4	8.499	553	60294.1	localization;developmental process;multicellular organismal process;biological regulation;metabolic process;reproductive process;cellular process;biological process involved in interspecies interaction between organisms	protein-containing complex;cellular anatomical entity	binding;catalytic activity	Posttranslational modification, protein turnover, chaperones	--
Calpain OS=Fasciola gigantica OX=46835 GN=FGIG_10864 PE=3 SV=1	F.gigantica	tr|A0A504YK94|A0A504YK94_FASGI	4	4	21.21	165	18525.2	--	--	--	--	--
ADF-H domain-containing protein OS=Fasciola gigantica OX=46835 GN=FGIG_01188 PE=3 SV=1	F.gigantica	tr|A0A504Z9P6|A0A504Z9P6_FASGI	4	4	38.03	142	15906.9	developmental process;cellular process;reproductive process	cellular anatomical entity	binding	--	--
Heat shock protein cognate 5 OS=Fasciola gigantica OX=46835 GN=FGIG_06752 PE=3 SV=1	F.gigantica	tr|A0A504YC27|A0A504YC27_FASGI	4	4	10.28	574	61672.9	cellular process;localization;biological regulation;response to stimulus	cellular anatomical entity	binding	Posttranslational modification, protein turnover, chaperones	RNA degradation
IST1 homolog OS=Fasciola gigantica OX=46835 GN=FGIG_02272 PE=3 SV=1	F.gigantica	tr|A0A504Y734|A0A504Y734_FASGI	5	5	14.25	365	39383.8	response to stimulus;localization;developmental process;viral process;biological regulation;metabolic process;growth;biological adhesion;cellular process;biological process involved in interspecies interaction between organisms	cellular anatomical entity	binding	--	Endocytosis
Heat shock protein mitochondrial OS=Fasciola gigantica OX=46835 GN=FGIG_07547 PE=3 SV=1	F.gigantica	tr|A0A504YM04|A0A504YM04_FASGI	4	4	8.885	574	61094.9	--	--	--	Posttranslational modification, protein turnover, chaperones	RNA degradation
Ubiquitin protein ligase BRE1 OS=Fasciola gigantica OX=46835 GN=FGIG_01778 PE=4 SV=1	F.gigantica	tr|A0A504YUN9|A0A504YUN9_FASGI	5	5	8.426	902	100587	--	--	--	Cell cycle control, cell division, chromosome partitioning	--
Guanylate kinase OS=Fasciola gigantica OX=46835 GN=FGIG_03556 PE=3 SV=1	F.gigantica	tr|A0A504YCZ1|A0A504YCZ1_FASGI	4	4	8.138	639	72179.4	--	cellular anatomical entity	catalytic activity	General function prediction only;Nucleotide transport and metabolism	--
AQP-2 OS=Fasciola gigantica OX=46835 GN=AQP-2 PE=2 SV=1	F.gigantica	tr|E3UZI5|E3UZI5_FASGI	4	4	9.153	295	32426.5	localization	cellular anatomical entity	transporter activity	Carbohydrate transport and metabolism	--
Heat shock protein kDa OS=Fasciola gigantica OX=46835 GN=FGIG_09654 PE=3 SV=1	F.gigantica	tr|A0A504Z3L5|A0A504Z3L5_FASGI	4	4	8.091	618	69845.6	--	--	--	Posttranslational modification, protein turnover, chaperones	Protein processing in endoplasmic reticulum; Longevity regulating pathway - multiple species; Endocytosis; Spliceosome
Succinate dehydrogenase [ubiquinone] flavoprotein subunit, mitochondrial OS=Fasciola gigantica OX=46835 GN=FGIG_08388 PE=3 SV=1	F.gigantica	tr|A0A504Y4X4|A0A504Y4X4_FASGI	7	7	11.67	651	71477.4	metabolic process;cellular process;developmental process;localization	cellular anatomical entity;protein-containing complex	binding;catalytic activity	Energy production and conversion	Carbon metabolism; Metabolic pathways; Oxidative phosphorylation; Citrate cycle (TCA cycle)
Bravo_FIGEY domain-containing protein OS=Fasciola gigantica OX=46835 GN=FGIG_03250 PE=4 SV=1	F.gigantica	tr|A0A504Y7M0|A0A504Y7M0_FASGI	5	3	9.143	875	96905.4	--	--	--	--	--
Queuosine salvage protein OS=Fasciola gigantica OX=46835 GN=FGIG_02089 PE=3 SV=1	F.gigantica	tr|A0A504YER7|A0A504YER7_FASGI	4	4	7.389	785	88407.3	--	--	--	--	--
Superoxide dismutase (Fragment) OS=Fasciola gigantica OX=46835 GN=FGIG_05938 PE=3 SV=1	F.gigantica	tr|A0A504YQ65|A0A504YQ65_FASGI	4	4	51.43	140	15515.3	--	--	--	Inorganic ion transport and metabolism	Huntington disease; Longevity regulating pathway - multiple species; Lipid and atherosclerosis; Longevity regulating pathway; Peroxisome; Chemical carcinogenesis - reactive oxygen species; FoxO signaling pathway
Ornithine aminotransferase mitochondrial OS=Fasciola gigantica OX=46835 GN=FGIG_06613 PE=3 SV=1	F.gigantica	tr|A0A504Z3T4|A0A504Z3T4_FASGI	4	4	16.26	326	37115.2	metabolic process;cellular process	cellular anatomical entity	catalytic activity;binding	Amino acid transport and metabolism	Metabolic pathways; Arginine and proline metabolism
Paramyosin OS=Fasciola gigantica OX=46835 GN=FGIG_02459 PE=3 SV=1	F.gigantica	tr|A0A504Z290|A0A504Z290_FASGI	4	4	4.74	865	99483.4	--	--	--	--	--
Putative phosphatase 1 regulatory subunit OS=Fasciola gigantica OX=46835 GN=FGIG_04523 PE=4 SV=1	F.gigantica	tr|A0A504YEE5|A0A504YEE5_FASGI	4	4	30.94	181	21063.1	biological regulation;cellular process	cellular anatomical entity	binding	--	--
Peptidylprolyl isomerase OS=Fasciola gigantica OX=46835 GN=FGIG_11294 PE=4 SV=1	F.gigantica	tr|A0A504YWR6|A0A504YWR6_FASGI	5	5	14.81	432	48599.7	--	--	--	--	--
Uncharacterized protein OS=Fasciola gigantica OX=46835 GN=FGIG_10587 PE=4 SV=1	F.gigantica	tr|A0A504YPR0|A0A504YPR0_FASGI	3	3	36.11	108	12530.6	--	--	--	--	--
Ubiquitin carboxyl-terminal hydrolase OS=Fasciola gigantica OX=46835 GN=FGIG_07368 PE=3 SV=1	F.gigantica	tr|A0A504YVF7|A0A504YVF7_FASGI	4	4	25.69	218	24623.9	developmental process;behavior;localization;metabolic process;biological regulation;multicellular organismal process;response to stimulus;cellular process	cellular anatomical entity	catalytic activity;binding	--	--
Uncharacterized protein OS=Fasciola gigantica OX=46835 GN=FGIG_03895 PE=4 SV=1	F.gigantica	tr|A0A504YEP0|A0A504YEP0_FASGI	3	3	11.81	432	47253.2	--	--	--	--	--
Sodium-coupled neutral amino acid transporter 9 OS=Fasciola gigantica OX=46835 GN=FGIG_01336 PE=4 SV=1	F.gigantica	tr|A0A504YQR0|A0A504YQR0_FASGI	4	4	12.77	642	70524.8	--	cellular anatomical entity	--	--	mTOR signaling pathway
Loss of heterozygosity 11 chromosomal region 2 protein OS=Fasciola gigantica OX=46835 GN=FGIG_05409 PE=4 SV=1	F.gigantica	tr|A0A504WSX7|A0A504WSX7_FASGI	4	4	5.762	833	91587.1	--	--	--	Coenzyme transport and metabolism;Signal transduction mechanisms;General function prediction only;Function unknown	--
Mediator of cell motility 1 OS=Fasciola gigantica OX=46835 GN=FGIG_08835 PE=3 SV=1	F.gigantica	tr|A0A504YL84|A0A504YL84_FASGI	3	3	17.57	296	33357.3	biological regulation	cellular anatomical entity	binding	--	--
Putative vacuolar protein sorting 26 vps26 OS=Fasciola gigantica OX=46835 GN=FGIG_01566 PE=4 SV=1	F.gigantica	tr|A0A504YQE4|A0A504YQE4_FASGI	3	3	7.26	551	60734	--	--	--	Function unknown	--
Annexin OS=Fasciola gigantica OX=46835 GN=FGIG_06592 PE=3 SV=1	F.gigantica	tr|A0A504Z5J0|A0A504Z5J0_FASGI	3	3	19.23	208	23517.6	--	--	--	--	--
Transaldolase OS=Fasciola gigantica OX=46835 GN=FGIG_05452 PE=3 SV=1	F.gigantica	tr|A0A504YML1|A0A504YML1_FASGI	4	4	21	281	31342.7	metabolic process;cellular process	cellular anatomical entity	binding;catalytic activity	Carbohydrate transport and metabolism	Metabolic pathways; Carbon metabolism; Biosynthesis of amino acids; Pentose phosphate pathway
Alpha-aminoadipic semialdehyde synthase mitochondrial OS=Fasciola gigantica OX=46835 GN=FGIG_09527 PE=4 SV=1	F.gigantica	tr|A0A504YZ46|A0A504YZ46_FASGI	3	3	31.58	95	10546.2	metabolic process;biological regulation;cellular process	--	catalytic activity	Amino acid transport and metabolism	Lysine degradation; Metabolic pathways
Uncharacterized protein OS=Fasciola gigantica OX=46835 GN=FGIG_01166 PE=4 SV=1	F.gigantica	tr|A0A504YXP1|A0A504YXP1_FASGI	3	3	2.708	1551	174872	--	--	--	--	--
Placenta-specificprotein 8 protein OS=Fasciola gigantica OX=46835 GN=FGIG_07833 PE=3 SV=1	F.gigantica	tr|A0A504YXV3|A0A504YXV3_FASGI	6	6	62.61	115	13234.2	--	--	--	--	--
Putative pyrophosphate-dependent phosphofructo-1-kinase OS=Fasciola gigantica OX=46835 GN=FGIG_04849 PE=4 SV=1	F.gigantica	tr|A0A504YDK3|A0A504YDK3_FASGI	4	4	11.9	420	46427.1	--	--	--	Carbohydrate transport and metabolism	Carbon metabolism; Biosynthesis of amino acids; RNA degradation; Pentose phosphate pathway; Glycolysis / Gluconeogenesis; Galactose metabolism; Metabolic pathways; Fructose and mannose metabolism
Calreticulin OS=Fasciola gigantica OX=46835 GN=FGIG_09000 PE=3 SV=1	F.gigantica	tr|A0A504ZBD5|A0A504ZBD5_FASGI	4	4	10.69	421	48832.9	cellular process	cellular anatomical entity	binding	--	Phagosome; Protein processing in endoplasmic reticulum
Putative Ribonucleotide-diphosphate reductase small subunit OS=Fasciola gigantica OX=46835 GN=FGIG_04903 PE=3 SV=1	F.gigantica	tr|A0A504YXP2|A0A504YXP2_FASGI	3	3	17.9	257	29872.9	biological regulation;metabolic process;cellular process	protein-containing complex;cellular anatomical entity	binding;catalytic activity	Nucleotide transport and metabolism	Glutathione metabolism; Metabolic pathways; p53 signaling pathway; Drug metabolism - other enzymes; Pyrimidine metabolism; Purine metabolism
Hsc70-interacting protein isoform X2 OS=Fasciola gigantica OX=46835 GN=FGIG_10602 PE=3 SV=1	F.gigantica	tr|A0A504Z116|A0A504Z116_FASGI	3	3	10.61	396	44511.8	cellular process	cellular anatomical entity	molecular adaptor activity	Cell wall/membrane/envelope biogenesis;Posttranslational modification, protein turnover, chaperones	--
GTP-binding nuclear protein OS=Fasciola gigantica OX=46835 GN=FGIG_05103 PE=3 SV=1	F.gigantica	tr|A0A504YQR1|A0A504YQR1_FASGI	3	3	17.59	216	24717.2	biological regulation;localization;developmental process;cellular process	protein-containing complex;cellular anatomical entity	catalytic activity;binding	Transcription;General function prediction only	Ribosome biogenesis in eukaryotes; Nucleocytoplasmic transport
Alanine transaminase OS=Fasciola gigantica OX=46835 GN=FGIG_05611 PE=3 SV=1	F.gigantica	tr|A0A504Y8X6|A0A504Y8X6_FASGI	5	5	17.15	414	46163.4	cellular process;metabolic process	cellular anatomical entity	catalytic activity	Amino acid transport and metabolism	Metabolic pathways; Carbon metabolism; Arginine biosynthesis; Biosynthesis of amino acids; 2-Oxocarboxylic acid metabolism; Alanine, aspartate and glutamate metabolism
Regulator of microtubule dynamics protein 1 OS=Fasciola gigantica OX=46835 GN=FGIG_11865 PE=4 SV=1	F.gigantica	tr|A0A504YZZ9|A0A504YZZ9_FASGI	3	3	20.41	196	22689.8	--	--	--	--	--
Glycine cleavage system P protein OS=Fasciola gigantica OX=46835 GN=FGIG_04986 PE=3 SV=1	F.gigantica	tr|A0A504YUZ3|A0A504YUZ3_FASGI	5	5	6.018	914	101088	cellular process;metabolic process	cellular anatomical entity;protein-containing complex	catalytic activity;binding	--	Glyoxylate and dicarboxylate metabolism; Glycine, serine and threonine metabolism; Carbon metabolism; Metabolic pathways
CUB domain-containing protein OS=Fasciola gigantica OX=46835 GN=FGIG_03244 PE=4 SV=1	F.gigantica	tr|A0A504Z0I2|A0A504Z0I2_FASGI	3	3	12.54	311	34475.9	--	--	--	--	--
Putative actin-depolymerizing factor OS=Fasciola gigantica OX=46835 GN=FGIG_03015 PE=3 SV=1	F.gigantica	tr|A0A504Y8J6|A0A504Y8J6_FASGI	3	3	27.41	135	15610.6	biological regulation;developmental process;cellular process	cellular anatomical entity	binding	--	--
D-aspartate oxidase OS=Fasciola gigantica OX=46835 GN=FGIG_07464 PE=3 SV=1	F.gigantica	tr|A0A504YPX4|A0A504YPX4_FASGI	3	3	10.8	389	42494.5	metabolic process	--	--	Amino acid transport and metabolism	Peroxisome; D-Amino acid metabolism; Alanine, aspartate and glutamate metabolism; Metabolic pathways
Vitellogenin domain-containing protein OS=Fasciola gigantica OX=46835 GN=FGIG_02001 PE=4 SV=1	F.gigantica	tr|A0A504YJU5|A0A504YJU5_FASGI	2	2	2.542	1141	128598	--	--	--	--	--
CUB domain-containing protein OS=Fasciola gigantica OX=46835 GN=FGIG_03242 PE=4 SV=1	F.gigantica	tr|A0A504YTP0|A0A504YTP0_FASGI	3	3	19.21	177	19320	--	--	--	--	--
Calponin-homology (CH) domain-containing protein OS=Fasciola gigantica OX=46835 GN=FGIG_00874 PE=4 SV=1	F.gigantica	tr|A0A504Z9F5|A0A504Z9F5_FASGI	3	3	27.15	151	16978.6	--	--	--	--	--
Lanthionine synthetase c like protein 1 OS=Fasciola gigantica OX=46835 GN=FGIG_06244 PE=3 SV=1	F.gigantica	tr|A0A504Y8Y1|A0A504Y8Y1_FASGI	3	3	8.879	428	47583.9	--	--	--	--	--
Acid sphingomyelinase phosphodiesterase 3a OS=Fasciola gigantica OX=46835 GN=FGIG_09336 PE=4 SV=1	F.gigantica	tr|A0A504YQ34|A0A504YQ34_FASGI	4	4	16.49	479	54414.4	--	--	--	--	--
Purine nucleoside phosphorylase OS=Fasciola gigantica OX=46835 GN=FGIG_09928 PE=3 SV=1	F.gigantica	tr|A0A504YB65|A0A504YB65_FASGI	5	5	24.83	286	31047.2	biological regulation;metabolic process;multicellular organismal process;immune system process;cellular process;response to stimulus	cellular anatomical entity	binding;catalytic activity	Nucleotide transport and metabolism	Metabolic pathways; Purine metabolism; Pyrimidine metabolism; Nicotinate and nicotinamide metabolism
Globin-3 OS=Fasciola gigantica OX=46835 GN=FGIG_04911 PE=3 SV=1	F.gigantica	tr|A0A504YZF9|A0A504YZF9_FASGI	6	3	60.4	149	17091.5	--	--	--	--	--
Ubiquitin-conjugating enzyme OS=Fasciola gigantica OX=46835 GN=FGIG_06690 PE=3 SV=1	F.gigantica	tr|A0A504Z296|A0A504Z296_FASGI	5	5	42.42	165	19063.1	response to stimulus;cellular process;biological regulation;metabolic process	cellular anatomical entity	molecular function regulator;transcription regulator activity;catalytic activity;binding	--	Ubiquitin mediated proteolysis
Defective in cullin neddylation protein OS=Fasciola gigantica OX=46835 GN=FGIG_05889 PE=4 SV=1	F.gigantica	tr|A0A504YRA2|A0A504YRA2_FASGI	4	4	19.53	256	30409.5	cellular process;metabolic process	protein-containing complex	binding	--	--
Dynein light chain OS=Fasciola gigantica OX=46835 GN=FGIG_05227 PE=3 SV=1	F.gigantica	tr|A0A504X0J9|A0A504X0J9_FASGI	3	3	20	95	11470	localization;cellular process;developmental process;multicellular organismal process;biological regulation;metabolic process;reproductive process	protein-containing complex;cellular anatomical entity	binding;catalytic activity	--	Salmonella infection
Cathepsin L (Fragment) OS=Fasciola gigantica OX=46835 GN=cat-L1F PE=2 SV=1	F.gigantica	tr|Q9NGW0|Q9NGW0_FASGI	4	4	27.85	219	24415.3	metabolic process	cellular anatomical entity	catalytic activity	Inorganic ion transport and metabolism;Function unknown	Phagosome; Lysosome; Autophagy - animal; Apoptosis
Proton-translocating NAD(P)(+) transhydrogenase OS=Fasciola gigantica OX=46835 GN=FGIG_00851 PE=3 SV=1	F.gigantica	tr|A0A504YIK4|A0A504YIK4_FASGI	4	4	5.571	1095	114288	--	--	--	Energy production and conversion	Nicotinate and nicotinamide metabolism; Metabolic pathways
Transitional endoplasmic reticulum ATPase TER94 OS=Fasciola gigantica OX=46835 GN=FGIG_11990 PE=3 SV=1	F.gigantica	tr|A0A504YJX6|A0A504YJX6_FASGI	2	2	5.613	481	53162.1	response to stimulus;developmental process;viral process;behavior;localization;biological regulation;metabolic process;multicellular organismal process;cellular process	cellular anatomical entity;protein-containing complex	molecular function regulator;catalytic activity;binding	Signal transduction mechanisms;Cell wall/membrane/envelope biogenesis;Cell cycle control, cell division, chromosome partitioning	Protein processing in endoplasmic reticulum
Glucose-6-phosphate isomerase OS=Fasciola gigantica OX=46835 GN=FGIG_06020 PE=3 SV=1	F.gigantica	tr|A0A504YE35|A0A504YE35_FASGI	3	3	18.84	292	32854.6	metabolic process;biological regulation;multicellular organismal process;developmental process;immune system process;cellular process	cellular anatomical entity	binding;catalytic activity	Carbohydrate transport and metabolism	Metabolic pathways; Starch and sucrose metabolism; Carbon metabolism; Glycolysis / Gluconeogenesis; Pentose phosphate pathway; Biosynthesis of nucleotide sugars; Amino sugar and nucleotide sugar metabolism
Translationally controlled tumor-associated OS=Fasciola gigantica OX=46835 GN=FGIG_03252 PE=3 SV=1	F.gigantica	tr|A0A504Y9U6|A0A504Y9U6_FASGI	3	3	31.36	169	19896.4	response to stimulus;biological regulation;biological process involved in interspecies interaction between organisms	protein-containing complex;cellular anatomical entity	binding	--	--
Golgi-associated plant pathogenesis protein 1 OS=Fasciola gigantica OX=46835 GN=FGIG_10604 PE=4 SV=1	F.gigantica	tr|A0A504Z204|A0A504Z204_FASGI	3	3	11.11	405	43858.4	--	--	--	General function prediction only;Cell cycle control, cell division, chromosome partitioning	--
Thioredoxin dependent peroxide reductase OS=Fasciola gigantica OX=46835 GN=FGIG_05317 PE=3 SV=1	F.gigantica	tr|A0A504YI61|A0A504YI61_FASGI	3	3	16.82	220	24464	--	--	--	Defense mechanisms	--
Stress-induced-phosphoprotein 1 OS=Fasciola gigantica OX=46835 GN=FGIG_09548 PE=4 SV=1	F.gigantica	tr|A0A504YKD1|A0A504YKD1_FASGI	4	4	18.5	319	36299	--	--	--	--	--
Fh47 OS=Fasciola gigantica OX=46835 GN=FGIG_10895 PE=4 SV=1	F.gigantica	tr|A0A504ZC40|A0A504ZC40_FASGI	6	5	23.19	207	23963.4	metabolic process	--	catalytic activity	--	Glutathione metabolism; Chemical carcinogenesis - receptor activation; Chemical carcinogenesis - DNA adducts; Pathways in cancer; Metabolic pathways; Drug metabolism - other enzymes; Hepatocellular carcinoma; Chemical carcinogenesis - reactive oxygen species; Metabolism of xenobiotics by cytochrome P450; Platinum drug resistance; Fluid shear stress and atherosclerosis; Drug metabolism - cytochrom…
Actin-interacting protein 1 (Fragment) OS=Fasciola gigantica OX=46835 GN=FGIG_08755 PE=4 SV=1	F.gigantica	tr|A0A504Z4Z2|A0A504Z4Z2_FASGI	3	3	19.37	191	20781.5	--	--	--	--	--
Uncharacterized protein OS=Fasciola gigantica OX=46835 GN=FGIG_01347 PE=4 SV=1	F.gigantica	tr|A0A504YKL8|A0A504YKL8_FASGI	4	4	22.59	239	26798.4	--	--	--	--	--
Putative rna polymerase ii transcription elongation factor elongin/siii subunit elongin b OS=Fasciola gigantica OX=46835 GN=FGIG_06007 PE=4 SV=1	F.gigantica	tr|A0A504YIH8|A0A504YIH8_FASGI	2	2	17.6	125	14040.2	response to stimulus;developmental process;cellular process;metabolic process;biological regulation;multicellular organismal process	cellular anatomical entity;protein-containing complex	catalytic activity;transcription regulator activity;binding	--	Ubiquitin mediated proteolysis
Chaperonin containing T-complex polypeptide subunit zeta OS=Fasciola gigantica OX=46835 GN=FGIG_03371 PE=3 SV=1	F.gigantica	tr|A0A504YPN0|A0A504YPN0_FASGI	4	4	8.958	547	59738.6	reproductive process;cellular process;localization;biological regulation	cellular anatomical entity;protein-containing complex	binding;protein folding chaperone	Posttranslational modification, protein turnover, chaperones	--
T-complex protein 1 subunit eta OS=Fasciola gigantica OX=46835 GN=FGIG_07642 PE=3 SV=1	F.gigantica	tr|A0A504ZBK0|A0A504ZBK0_FASGI	3	3	7.523	545	59677.3	reproductive process;biological regulation;cellular process;localization	cellular anatomical entity;protein-containing complex	binding;protein folding chaperone	Posttranslational modification, protein turnover, chaperones	--
Exportin-2 OS=Fasciola gigantica OX=46835 GN=FGIG_08874 PE=3 SV=1	F.gigantica	tr|A0A504YZP5|A0A504YZP5_FASGI	3	3	3.826	967	107933	biological regulation;localization;cellular process	cellular anatomical entity	binding	--	Nucleocytoplasmic transport
Uncharacterized protein OS=Fasciola gigantica OX=46835 GN=FGIG_07142 PE=3 SV=1	F.gigantica	tr|A0A504Z1G4|A0A504Z1G4_FASGI	3	3	27.69	130	13939.6	--	--	--	--	--
Paramyosin OS=Fasciola gigantica OX=46835 GN=FGIG_08945 PE=3 SV=1	F.gigantica	tr|A0A504Z112|A0A504Z112_FASGI	4	3	2.261	1946	223176	--	cellular anatomical entity	cytoskeletal motor activity;binding	--	--
Tegumental calcium-binding EF-hand protein 4 OS=Fasciola gigantica OX=46835 GN=FGIG_00362 PE=4 SV=1	F.gigantica	tr|A0A504Y5U7|A0A504Y5U7_FASGI	2	2	11.32	212	24779.2	--	--	--	--	--
MF6 OS=Fasciola gigantica OX=46835 GN=FGIG_04341 PE=2 SV=1	F.gigantica	tr|A0A286RXS6|A0A286RXS6_FASGI	2	2	18.89	90	10242.9	--	--	--	--	--
RNA 3'-terminal phosphate cyclase OS=Fasciola gigantica OX=46835 GN=FGIG_03848 PE=3 SV=1	F.gigantica	tr|A0A504YWS3|A0A504YWS3_FASGI	4	4	15.43	363	38966.8	--	cellular anatomical entity	binding;catalytic activity	RNA processing and modification	--
Glutathione peroxidase OS=Fasciola gigantica OX=46835 GN=FGIG_06396 PE=3 SV=1	F.gigantica	tr|A0A504Y9C3|A0A504Y9C3_FASGI	2	2	50.72	69	7977.2	detoxification;response to stimulus;cellular process	--	antioxidant activity;catalytic activity	Defense mechanisms;Lipid transport and metabolism	Metabolic pathways; Glutathione metabolism
Retinol dehydrogenase 11 OS=Fasciola gigantica OX=46835 GN=FGIG_10053 PE=4 SV=1	F.gigantica	tr|A0A504YMM7|A0A504YMM7_FASGI	3	3	21.74	322	35683.6	--	--	--	General function prediction only;Lipid transport and metabolism	Metabolic pathways; Biosynthesis of cofactors; Retinol metabolism
Serine/threonine-protein phosphatase CPPED1 OS=Fasciola gigantica OX=46835 GN=FGIG_02876 PE=4 SV=1	F.gigantica	tr|A0A504YHF5|A0A504YHF5_FASGI	4	4	21.02	314	35760.8	--	--	--	Signal transduction mechanisms	--
Uncharacterized protein OS=Fasciola gigantica OX=46835 GN=FGIG_03274 PE=4 SV=1	F.gigantica	tr|A0A504YDF3|A0A504YDF3_FASGI	3	3	21.48	135	14843.9	--	--	--	--	--
ADP-ribosyl cyclase/cyclic ADP-ribose hydrolase OS=Fasciola gigantica OX=46835 GN=FGIG_04434 PE=3 SV=1	F.gigantica	tr|A0A504YMY5|A0A504YMY5_FASGI	3	3	12.89	287	32362.1	--	--	--	--	--
S-(hydroxymethyl)glutathione dehydrogenase OS=Fasciola gigantica OX=46835 GN=FGIG_00370 PE=3 SV=1	F.gigantica	tr|A0A504ZAD8|A0A504ZAD8_FASGI	2	2	7.162	377	40446.2	cellular process;biological regulation;metabolic process;multicellular organismal process;response to stimulus;detoxification	cellular anatomical entity	catalytic activity;binding	Energy production and conversion	Pyruvate metabolism; Fatty acid degradation; Glycolysis / Gluconeogenesis; Metabolic pathways; Metabolism of xenobiotics by cytochrome P450; Tyrosine metabolism; Retinol metabolism; Drug metabolism - cytochrome P450; Carbon metabolism
Putative laminin OS=Fasciola gigantica OX=46835 GN=FGIG_08749 PE=4 SV=1	F.gigantica	tr|A0A504YJT9|A0A504YJT9_FASGI	3	3	1.929	1814	201200	--	--	--	--	ECM-receptor interaction
Tetraspanin (Fragment) OS=Fasciola gigantica OX=46835 GN=FGIG_12136 PE=4 SV=1	F.gigantica	tr|A0A504YAG5|A0A504YAG5_FASGI	3	3	13.86	166	17786.8	developmental process;cellular process;biological regulation	cellular anatomical entity;protein-containing complex	binding	--	Lysosome; Proteoglycans in cancer
Adenylate kinase isoenzyme 1 OS=Fasciola gigantica OX=46835 GN=FGIG_02159 PE=3 SV=1	F.gigantica	tr|A0A504Y532|A0A504Y532_FASGI	3	3	16.91	136	14963.3	response to stimulus;cellular process;developmental process;metabolic process;biological regulation	cellular anatomical entity	catalytic activity;binding	Nucleotide transport and metabolism	Thiamine metabolism; Purine metabolism; Metabolic pathways; Biosynthesis of cofactors
ATP:UMP phosphotransferase OS=Fasciola gigantica OX=46835 GN=FGIG_02158 PE=3 SV=1	F.gigantica	tr|A0A504Y7J3|A0A504Y7J3_FASGI	3	3	15.63	160	18743.4	cellular process;metabolic process	cellular anatomical entity	catalytic activity;binding	Nucleotide transport and metabolism	Thiamine metabolism; Purine metabolism; Biosynthesis of cofactors; Metabolic pathways
Mitogen-activated protein kinase OS=Fasciola gigantica OX=46835 GN=FGIG_02161 PE=3 SV=1	F.gigantica	tr|A0A504Y668|A0A504Y668_FASGI	2	2	9.687	351	40105	immune system process;cellular process;response to stimulus;developmental process;viral process;behavior;localization;metabolic process;biological regulation;multicellular organismal process	cellular anatomical entity;protein-containing complex	binding;catalytic activity	Defense mechanisms;Transcription;Cell wall/membrane/envelope biogenesis;Posttranslational modification, protein turnover, chaperones;Intracellular trafficking, secretion, and vesicular transport	Dorso-ventral axis formation; Autophagy - animal; mTOR signaling pathway; TGF-beta signaling pathway; FoxO signaling pathway; Apoptosis - fly; MAPK signaling pathway - fly
Suppressor of profilin 2 OS=Fasciola gigantica OX=46835 GN=FGIG_12414 PE=3 SV=1	F.gigantica	tr|A0A504YMI1|A0A504YMI1_FASGI	2	2	8.734	229	25323.8	--	--	--	--	Endocytosis
Calpain-2 catalytic subunit OS=Fasciola gigantica OX=46835 GN=FGIG_01894 PE=3 SV=1	F.gigantica	tr|A0A504YRD0|A0A504YRD0_FASGI	2	2	3.179	755	85934	locomotion;reproductive process;developmental process;cellular process;metabolic process;multicellular organismal process	cellular anatomical entity	catalytic activity;binding	--	--
Tubulin-specific chaperone D OS=Fasciola gigantica OX=46835 GN=FGIG_01191 PE=3 SV=1	F.gigantica	tr|A0A504YBX5|A0A504YBX5_FASGI	2	2	2.312	1211	135842	--	--	--	--	--
Uncharacterized protein OS=Fasciola gigantica OX=46835 GN=FGIG_05183 PE=4 SV=1	F.gigantica	tr|A0A504Y5V7|A0A504Y5V7_FASGI	2	2	15.84	202	22426.3	--	--	--	--	--
F-actin-capping protein subunit beta OS=Fasciola gigantica OX=46835 GN=FGIG_03122 PE=3 SV=1	F.gigantica	tr|A0A504Z3F4|A0A504Z3F4_FASGI	3	3	18.55	275	31098.9	--	cellular anatomical entity	--	--	Endocytosis
V-type proton ATPase subunit a OS=Fasciola gigantica OX=46835 GN=FGIG_00170 PE=3 SV=1	F.gigantica	tr|A0A504YEN2|A0A504YEN2_FASGI	2	2	3.065	881	99401.2	--	--	--	Energy production and conversion	Lysosome; Phagosome; Metabolic pathways; Oxidative phosphorylation
Kunitz protein 8 OS=Fasciola gigantica OX=46835 GN=FGIG_05379 PE=4 SV=1	F.gigantica	tr|A0A504Z2I4|A0A504Z2I4_FASGI	2	2	29.76	84	9126.4	--	--	--	--	--
Uncharacterized protein (Fragment) OS=Fasciola gigantica OX=46835 GN=FGIG_10213 PE=4 SV=1	F.gigantica	tr|A0A504Y7X1|A0A504Y7X1_FASGI	2	2	24.69	162	18391	--	--	--	--	--
Lysosomal Pro-X carboxypeptidase OS=Fasciola gigantica OX=46835 GN=FGIG_09439 PE=3 SV=1	F.gigantica	tr|A0A504YTN5|A0A504YTN5_FASGI	2	2	8.383	334	37720	metabolic process;biological regulation;response to stimulus	--	catalytic activity	--	--
Dihydrolipoamide acetyltransferase component of pyruvate dehydrogenase complex OS=Fasciola gigantica OX=46835 GN=FGIG_08469 PE=3 SV=1	F.gigantica	tr|A0A504YEA7|A0A504YEA7_FASGI	2	2	5.251	419	45555.4	cellular process;metabolic process	cellular anatomical entity;protein-containing complex	catalytic activity;binding	Energy production and conversion	Metabolic pathways; Propanoate metabolism; Valine, leucine and isoleucine degradation
Microtubule-associated protein RP/EB family member OS=Fasciola gigantica OX=46835 GN=FGIG_04512 PE=4 SV=1	F.gigantica	tr|A0A504YW74|A0A504YW74_FASGI	2	2	11.69	248	27945.7	biological regulation;cellular process;localization	cellular anatomical entity	binding	--	--
Phosphatidylinositol transfer protein alpha OS=Fasciola gigantica OX=46835 GN=FGIG_05603 PE=4 SV=1	F.gigantica	tr|A0A504YI44|A0A504YI44_FASGI	4	4	17.24	203	23210.6	localization;cellular process;developmental process;multicellular organismal process	cellular anatomical entity	binding;transporter activity	--	--
Ubiquitin-conjugating enzyme OS=Fasciola gigantica OX=46835 GN=FGIG_03290 PE=3 SV=1	F.gigantica	tr|A0A504Y2Y1|A0A504Y2Y1_FASGI	3	3	21.77	147	16642	cellular process;developmental process;multicellular organismal process;metabolic process;biological regulation;reproductive process;locomotion	protein-containing complex	binding;catalytic activity	Posttranslational modification, protein turnover, chaperones	Protein processing in endoplasmic reticulum; MAPK signaling pathway - fly; Ubiquitin mediated proteolysis; Toll and Imd signaling pathway
Putative annexin (Fragment) OS=Fasciola gigantica OX=46835 GN=FGIG_11369 PE=3 SV=1	F.gigantica	tr|A0A504YXG1|A0A504YXG1_FASGI	4	4	16.67	192	22108.6	response to stimulus;negative regulation of biological process;cellular process;biological regulation	--	binding	--	--
Calponin OS=Fasciola gigantica OX=46835 GN=FGIG_00165 PE=3 SV=1	F.gigantica	tr|A0A504Y7U6|A0A504Y7U6_FASGI	2	2	9.972	361	38478.5	cellular process	--	binding	--	--
Phosphotransferase OS=Fasciola gigantica OX=46835 GN=FGIG_07283 PE=3 SV=1	F.gigantica	tr|A0A504YWR2|A0A504YWR2_FASGI	2	2	4.734	507	56396.2	--	--	--	Carbohydrate transport and metabolism	Biosynthesis of nucleotide sugars; Fructose and mannose metabolism; Metabolic pathways; Galactose metabolism; Glycolysis / Gluconeogenesis; Amino sugar and nucleotide sugar metabolism; Carbon metabolism; Starch and sucrose metabolism
Ras protein Rab 2 OS=Fasciola gigantica OX=46835 GN=FGIG_05549 PE=4 SV=1	F.gigantica	tr|A0A504Z9W1|A0A504Z9W1_FASGI	3	3	18.87	212	23486.3	--	--	--	General function prediction only	--
Calcium binding protein 39 OS=Fasciola gigantica OX=46835 GN=FGIG_09076 PE=3 SV=1	F.gigantica	tr|A0A504YXL7|A0A504YXL7_FASGI	2	2	9.852	406	46613	biological regulation	cellular anatomical entity	binding	--	mTOR signaling pathway
Rab GDP dissociation inhibitor (Fragment) OS=Fasciola gigantica OX=46835 GN=FGIG_12698 PE=3 SV=1	F.gigantica	tr|A0A504YC55|A0A504YC55_FASGI	4	2	36.67	180	20115.3	biological regulation;multicellular organismal process;developmental process;cellular process;reproduction	cellular anatomical entity	catalytic activity;molecular function regulator	--	--
14-3-3 epsilon isoform OS=Fasciola gigantica OX=46835 PE=2 SV=1	F.gigantica	tr|A0A5S8ZDC9|A0A5S8ZDC9_FASGI	3	2	24.12	257	29289	locomotion;response to stimulus;reproductive process;biological regulation;multicellular organismal process;developmental process;cellular process	cellular anatomical entity;protein-containing complex	binding;catalytic activity	--	Hippo signaling pathway - fly
Uncharacterized protein OS=Fasciola gigantica OX=46835 GN=FGIG_07372 PE=4 SV=1	F.gigantica	tr|A0A504WY94|A0A504WY94_FASGI	2	2	19.26	135	14008.6	--	--	--	--	--
NAD-dependent succinate-semialdehyde dehydrogenase OS=Fasciola gigantica OX=46835 GN=FGIG_09129 PE=3 SV=1	F.gigantica	tr|A0A504YWE3|A0A504YWE3_FASGI	2	2	10.24	332	35221	biological regulation;metabolic process;multicellular organismal process;developmental process;cellular process	cellular anatomical entity	binding;catalytic activity	Lipid transport and metabolism	Metabolic pathways; Butanoate metabolism; Alanine, aspartate and glutamate metabolism
Tetraspanin OS=Fasciola gigantica OX=46835 GN=FGIG_03543 PE=3 SV=1	F.gigantica	tr|A0A504Z060|A0A504Z060_FASGI	3	3	20.18	218	23970.1	--	cellular anatomical entity	--	--	Lysosome
Programmed cell death protein 6 OS=Fasciola gigantica OX=46835 GN=FGIG_10985 PE=4 SV=1	F.gigantica	tr|A0A504YSV3|A0A504YSV3_FASGI	2	2	17.65	170	19718.5	metabolic process	cellular anatomical entity	catalytic activity;binding	--	--
Uncharacterized protein OS=Fasciola gigantica OX=46835 GN=FGIG_02369 PE=4 SV=1	F.gigantica	tr|A0A504Y554|A0A504Y554_FASGI	3	3	3.762	1010	110847	--	--	--	--	--
Histone H2B OS=Fasciola gigantica OX=46835 GN=FGIG_11587 PE=3 SV=1; Histone H2B OS=Fasciola gigantica OX=46835 GN=FGIG_02169 PE=3 SV=1	F.gigantica	tr|A0A504Z6J7|A0A504Z6J7_FASGI;tr|A0A504Y6T2|A0A504Y6T2_FASGI	2	2	19.67	122	13676.9	cellular process	protein-containing complex;cellular anatomical entity	binding	--	--
Dihydrolipoamide dehydrogenase OS=Fasciola gigantica OX=46835 GN=FGIG_06036 PE=4 SV=1	F.gigantica	tr|A0A504YE42|A0A504YE42_FASGI	2	2	9.653	259	28121	reproductive process;metabolic process;biological regulation;multicellular organismal process;developmental process;cellular process	cellular anatomical entity;protein-containing complex	catalytic activity;binding	Energy production and conversion	Glyoxylate and dicarboxylate metabolism; Valine, leucine and isoleucine degradation; Citrate cycle (TCA cycle); Tryptophan metabolism; Propanoate metabolism; Glycine, serine and threonine metabolism; Carbon metabolism; Pyruvate metabolism; Lysine degradation; Glycolysis / Gluconeogenesis; Biosynthesis of cofactors; Metabolic pathways
GST 26 OS=Fasciola gigantica OX=46835 GN=FGIG_10896 PE=4 SV=1	F.gigantica	tr|A0A504Z3G8|A0A504Z3G8_FASGI	3	3	50	70	8394.5	metabolic process	cellular anatomical entity	binding;catalytic activity	--	Drug metabolism - cytochrome P450; Metabolism of xenobiotics by cytochrome P450; Drug metabolism - other enzymes; Metabolic pathways; Glutathione metabolism
Uncharacterized protein (Fragment) OS=Fasciola gigantica OX=46835 GN=FGIG_08173 PE=4 SV=1	F.gigantica	tr|A0A504Y8Q2|A0A504Y8Q2_FASGI	2	2	6.863	408	46054	--	--	--	--	--
Exportin-1 OS=Fasciola gigantica OX=46835 GN=FGIG_12357 PE=3 SV=1	F.gigantica	tr|A0A504YDK9|A0A504YDK9_FASGI	3	3	7.424	458	52954	response to stimulus;biological regulation;multi-organism process;viral process;cellular process;localization	protein-containing complex;cellular anatomical entity	binding;molecular carrier activity	--	Nucleocytoplasmic transport; Ribosome biogenesis in eukaryotes
Prostaglandin e synthase OS=Fasciola gigantica OX=46835 GN=FGIG_11053 PE=3 SV=1	F.gigantica	tr|A0A504YPM3|A0A504YPM3_FASGI	2	2	15.66	198	22270.3	--	--	--	--	Metabolic pathways; Arachidonic acid metabolism
Uncharacterized protein OS=Fasciola gigantica OX=46835 GN=FGIG_00351 PE=4 SV=1	F.gigantica	tr|A0A504Y465|A0A504Y465_FASGI	2	2	18.49	146	17499.2	--	--	--	--	--
NAD(P)H-hydrate epimerase OS=Fasciola gigantica OX=46835 GN=FGIG_03379 PE=3 SV=1	F.gigantica	tr|A0A504YGL1|A0A504YGL1_FASGI	2	2	7.819	243	26633.6	--	--	--	--	--
Formin binding protein (Fragment) OS=Fasciola gigantica OX=46835 GN=FGIG_10144 PE=4 SV=1	F.gigantica	tr|A0A504YZ29|A0A504YZ29_FASGI	3	3	5.965	570	63426.6	localization;cellular process;developmental process;multicellular organismal process;biological regulation	cellular anatomical entity	binding	--	--
Orotidine 5'-phosphate decarboxylase OS=Fasciola gigantica OX=46835 GN=FGIG_07808 PE=3 SV=1	F.gigantica	tr|A0A504YFY9|A0A504YFY9_FASGI	2	2	1.871	1550	171025	metabolic process;cellular process	cellular anatomical entity	catalytic activity	--	Metabolic pathways; Biosynthesis of cofactors; Pyrimidine metabolism; Drug metabolism - other enzymes
Eukaryotic translation initiation factor 5A OS=Fasciola gigantica OX=46835 GN=FGIG_02894 PE=3 SV=1	F.gigantica	tr|A0A504YWG8|A0A504YWG8_FASGI	3	3	18.82	186	20646.1	biological regulation;metabolic process;localization;developmental process;cellular process;reproductive process;response to stimulus	cellular anatomical entity;protein-containing complex	binding;translation regulator activity	Translation, ribosomal structure and biogenesis	--
BRO1 domain and CAAX motif containing OS=Fasciola gigantica OX=46835 GN=FGIG_04970 PE=3 SV=1	F.gigantica	tr|A0A504YRB3|A0A504YRB3_FASGI	2	2	5.594	429	48672.6	--	cellular anatomical entity	--	--	--
Activator of 90 kDa heat shock protein ATPase 1 (Fragment) OS=Fasciola gigantica OX=46835 GN=FGIG_12017 PE=3 SV=1	F.gigantica	tr|A0A504YJB7|A0A504YJB7_FASGI	2	2	23.31	133	14865.7	biological regulation;response to stimulus	cellular anatomical entity	binding;molecular function regulator	--	--
Malate dehydrogenase OS=Fasciola gigantica OX=46835 GN=FGIG_12658 PE=4 SV=1	F.gigantica	tr|A0A504Z4Z6|A0A504Z4Z6_FASGI	2	2	18.49	119	13203	--	--	--	Energy production and conversion	--
Receptor expression-enhancing protein OS=Fasciola gigantica OX=46835 GN=FGIG_09953 PE=3 SV=1	F.gigantica	tr|A0A504YLC6|A0A504YLC6_FASGI	2	2	24.17	120	13771.9	--	cellular anatomical entity	binding	--	--
Rab-protein 8 OS=Fasciola gigantica OX=46835 GN=FGIG_06830 PE=4 SV=1	F.gigantica	tr|A0A504YU78|A0A504YU78_FASGI	2	2	6.047	215	24143.4	--	--	--	--	--
Arf-GAP with dual PH domain-containing protein 1 OS=Fasciola gigantica OX=46835 GN=FGIG_03771 PE=4 SV=1	F.gigantica	tr|A0A504Y890|A0A504Y890_FASGI	3	3	7.75	400	45557.4	--	--	--	--	--
Ubiquitin conjugating enzyme OS=Fasciola gigantica OX=46835 GN=FGIG_10388 PE=3 SV=1	F.gigantica	tr|A0A504YV37|A0A504YV37_FASGI	2	2	19.73	147	16556.6	metabolic process;biological regulation;multicellular organismal process;developmental process;response to stimulus;cellular process;immune system process;reproductive process	protein-containing complex;cellular anatomical entity	binding;catalytic activity	Posttranslational modification, protein turnover, chaperones	Ubiquitin mediated proteolysis; Protein processing in endoplasmic reticulum
Uncharacterized protein OS=Fasciola gigantica OX=46835 GN=FGIG_10428 PE=4 SV=1	F.gigantica	tr|A0A504YPP7|A0A504YPP7_FASGI	1	1	4.315	394	45698.4	--	--	--	--	--
Enamine/imine deaminase OS=Fasciola gigantica OX=46835 GN=FGIG_10828 PE=3 SV=1	F.gigantica	tr|A0A504YC87|A0A504YC87_FASGI	2	2	3.709	701	78540.8	developmental process;biological regulation	cellular anatomical entity	binding;catalytic activity	Defense mechanisms	--
EGF-like domain-containing protein OS=Fasciola gigantica OX=46835 GN=FGIG_00114 PE=4 SV=1	F.gigantica	tr|A0A504YKJ0|A0A504YKJ0_FASGI	1	1	0.5988	1837	209742	--	--	--	--	--
Ubiquitin carboxyl-terminal hydrolase OS=Fasciola gigantica OX=46835 GN=FGIG_06318 PE=3 SV=1	F.gigantica	tr|A0A504YC83|A0A504YC83_FASGI	2	2	2.486	925	102737	cellular process;metabolic process;biological regulation	--	binding;catalytic activity	--	--
Uncharacterized protein OS=Fasciola gigantica OX=46835 GN=FGIG_07788 PE=4 SV=1	F.gigantica	tr|A0A504Y7T1|A0A504Y7T1_FASGI	4	2	7.623	446	49615.8	--	--	--	--	--
Farnesyl-pyrophosphate synthetase OS=Fasciola gigantica OX=46835 GN=FGIG_04602 PE=3 SV=1	F.gigantica	tr|A0A504Z1M2|A0A504Z1M2_FASGI	1	1	4.967	302	34353.9	--	--	--	Coenzyme transport and metabolism	Human T-cell leukemia virus 1 infection; Terpenoid backbone biosynthesis; Influenza A; Metabolic pathways
Ras protein Rab-5C OS=Fasciola gigantica OX=46835 GN=FGIG_12164 PE=4 SV=1	F.gigantica	tr|A0A504XMC1|A0A504XMC1_FASGI	2	2	27.2	125	14074.1	cellular process;immune system process;localization;biological regulation	cellular anatomical entity	catalytic activity;binding	--	--
N-acetylgalactosamine kinase OS=Fasciola gigantica OX=46835 GN=FGIG_00237 PE=3 SV=1	F.gigantica	tr|A0A504YYL4|A0A504YYL4_FASGI	2	2	4.049	494	53581	metabolic process	--	catalytic activity	Carbohydrate transport and metabolism	Metabolic pathways; Amino sugar and nucleotide sugar metabolism; Biosynthesis of nucleotide sugars
Serpin OS=Fasciola gigantica OX=46835 GN=FGIG_01892 PE=3 SV=1	F.gigantica	tr|A0A504YJ47|A0A504YJ47_FASGI	1	1	4.167	408	46555.6	--	--	--	Posttranslational modification, protein turnover, chaperones	--
Bisphosphate nucleotidase 1 OS=Fasciola gigantica OX=46835 GN=FGIG_00873 PE=3 SV=1	F.gigantica	tr|A0A504YZ18|A0A504YZ18_FASGI	1	1	4.893	327	34769.9	--	--	--	Carbohydrate transport and metabolism;Inorganic ion transport and metabolism	Sulfur metabolism; Metabolic pathways
Succinate dehydrogenase [ubiquinone] iron-sulfur subunit, mitochondrial (Fragment) OS=Fasciola gigantica OX=46835 GN=FGIG_09770 PE=3 SV=1	F.gigantica	tr|A0A504YRX6|A0A504YRX6_FASGI	1	1	5	240	27838.2	--	--	--	Energy production and conversion	Citrate cycle (TCA cycle); Oxidative phosphorylation; Carbon metabolism; Metabolic pathways
Platelet-activating factor acetylhydrolase IB subunit gamma OS=Fasciola gigantica OX=46835 GN=FGIG_07313 PE=4 SV=1	F.gigantica	tr|A0A504YQJ3|A0A504YQJ3_FASGI	2	2	10.04	229	25969.4	reproductive process;biological regulation;metabolic process;developmental process;cellular process	cellular anatomical entity	binding;catalytic activity	Carbohydrate transport and metabolism;Lipid transport and metabolism;Cell cycle control, cell division, chromosome partitioning	Ether lipid metabolism; Metabolic pathways
Coatomer subunit alpha OS=Fasciola gigantica OX=46835 GN=FGIG_01593 PE=4 SV=1	F.gigantica	tr|A0A504YBD2|A0A504YBD2_FASGI	1	1	1.35	1111	123735	localization;cellular process;multicellular organismal process;biological regulation	cellular anatomical entity;protein-containing complex	binding	--	--
Tegumental calcium-binding EF-hand protein 4 OS=Fasciola gigantica OX=46835 GN=FGIG_09303 PE=4 SV=1	F.gigantica	tr|A0A504YZT4|A0A504YZT4_FASGI	2	2	13.76	189	22284.4	biological regulation;cellular process	protein-containing complex;cellular anatomical entity	binding	--	--
Ras protein Ral-A OS=Fasciola gigantica OX=46835 GN=FGIG_02617 PE=4 SV=1	F.gigantica	tr|A0A504YMJ1|A0A504YMJ1_FASGI	2	2	16.13	155	17529	biological process involved in interspecies interaction between organisms;immune system process;cellular process;reproductive process;biological regulation;localization;developmental process;locomotion;response to stimulus	cellular anatomical entity	catalytic activity;binding	--	--
Phosphate carrier protein, mitochondrial OS=Fasciola gigantica OX=46835 GN=FGIG_02291 PE=3 SV=1	F.gigantica	tr|A0A504Z057|A0A504Z057_FASGI	2	2	9.524	315	35076.9	localization;cellular process;metabolic process	cellular anatomical entity	structural molecule activity	--	--
Legumain-1 OS=Fasciola gigantica OX=46835 PE=2 SV=1; Legumain like OS=Fasciola gigantica OX=46835 GN=FGIG_02693 PE=3 SV=1	F.gigantica	tr|A6Y9U8|A6Y9U8_FASGI;tr|A0A504YCT9|A0A504YCT9_FASGI	2	2	5.647	425	48027.1	metabolic process	--	catalytic activity	Amino acid transport and metabolism;Posttranslational modification, protein turnover, chaperones	Lysosome
Collagen type IV alpha 2 chain OS=Fasciola gigantica OX=46835 GN=FGIG_01356 PE=4 SV=1	F.gigantica	tr|A0A504Z0M2|A0A504Z0M2_FASGI	1	1	0.6127	1632	163134	cellular process;developmental process	cellular anatomical entity;protein-containing complex	binding	--	--
Serine/threonine-protein phosphatase 2A 65 kDa regulatory subunit A alpha isoform OS=Fasciola gigantica OX=46835 GN=FGIG_10421 PE=4 SV=1	F.gigantica	tr|A0A504Z0C8|A0A504Z0C8_FASGI	1	1	2.183	504	56565.6	biological regulation;cellular process	--	--	--	Hippo signaling pathway - fly; mRNA surveillance pathway; TGF-beta signaling pathway
Echinoderm microtubule-associated protein 1 OS=Fasciola gigantica OX=46835 GN=FGIG_11867 PE=4 SV=1	F.gigantica	tr|A0A504Z7P8|A0A504Z7P8_FASGI	2	2	3.478	460	50635.7	--	--	--	--	--
Rho gtp-binding protein rhoc OS=Fasciola gigantica OX=46835 GN=FGIG_06759 PE=4 SV=1	F.gigantica	tr|A0A504YLF6|A0A504YLF6_FASGI	2	2	10.94	192	21889.1	locomotion;cellular process;developmental process;localization;biological regulation	cellular anatomical entity	binding	--	TGF-beta signaling pathway; Endocytosis; mTOR signaling pathway; Wnt signaling pathway
Seryl-tRNA synthetase OS=Fasciola gigantica OX=46835 GN=FGIG_09040 PE=4 SV=1	F.gigantica	tr|A0A504Z024|A0A504Z024_FASGI	1	1	2.655	452	49893	cellular process;metabolic process	cellular anatomical entity	binding;catalytic activity	Translation, ribosomal structure and biogenesis	Aminoacyl-tRNA biosynthesis
Programmed cell death protein 6 OS=Fasciola gigantica OX=46835 GN=FGIG_12457 PE=4 SV=1	F.gigantica	tr|A0A504YP20|A0A504YP20_FASGI	2	2	17.65	170	19855.5	metabolic process	cellular anatomical entity	binding;catalytic activity	--	--
Xaa-Pro aminopeptidase OS=Fasciola gigantica OX=46835 GN=FGIG_07152 PE=4 SV=1	F.gigantica	tr|A0A504YBD7|A0A504YBD7_FASGI	2	2	3.535	594	65540.8	metabolic process	cellular anatomical entity	catalytic activity;binding	Amino acid transport and metabolism	--
Uncharacterized protein OS=Fasciola gigantica OX=46835 GN=FGIG_06102 PE=4 SV=1	F.gigantica	tr|A0A504Z459|A0A504Z459_FASGI	1	1	8.176	159	18520.5	--	--	--	--	--
Multidrug resistance protein 1 (Fragment) OS=Fasciola gigantica OX=46835 GN=FGIG_05063 PE=4 SV=1	F.gigantica	tr|A0A504YSZ7|A0A504YSZ7_FASGI	3	3	3.133	1181	129723	cellular process;immune system process;rhythmic process;reproductive process;localization;developmental process;multicellular organismal process;biological regulation;response to stimulus	cellular anatomical entity	binding;ATP-dependent activity;transporter activity	--	ABC transporters
Annexin OS=Fasciola gigantica OX=46835 GN=FGIG_02838 PE=3 SV=1	F.gigantica	tr|A0A504YFM5|A0A504YFM5_FASGI	1	1	4.428	271	30763.8	--	--	binding	--	--
Laminin gamma 1 OS=Fasciola gigantica OX=46835 GN=FGIG_02235 PE=4 SV=1	F.gigantica	tr|A0A504YHP8|A0A504YHP8_FASGI	2	2	3.409	704	78609.5	regulation of biological process;cellular process;developmental process	cellular anatomical entity	--	--	--
Calcium-transporting ATPase OS=Fasciola gigantica OX=46835 GN=FGIG_00477 PE=3 SV=1	F.gigantica	tr|A0A504YYL9|A0A504YYL9_FASGI	1	1	2.02	693	75556.4	cellular process;reproductive process;developmental process;localization;biological regulation;multicellular organismal process;response to stimulus;locomotion	protein-containing complex;cellular anatomical entity	ATP-dependent activity;binding;transporter activity;molecular function regulator	Inorganic ion transport and metabolism	--
Peroxidase OS=Fasciola gigantica OX=46835 GN=FGIG_04138 PE=4 SV=1	F.gigantica	tr|A0A504YSS8|A0A504YSS8_FASGI	2	2	2.398	1418	159635	response to stimulus;cellular process;metabolic process	cellular anatomical entity	catalytic activity;binding	Cell wall/membrane/envelope biogenesis;Secondary metabolites biosynthesis, transport and catabolism	--
ARF small monomeric GTPase OS=Fasciola gigantica OX=46835 GN=FGIG_08984 PE=3 SV=1	F.gigantica	tr|A0A504YVL4|A0A504YVL4_FASGI	4	2	36.46	181	20489.4	cellular process;reproductive process;biological adhesion;biological regulation;multicellular organismal process;developmental process;localization;locomotion	cellular anatomical entity	binding;catalytic activity;molecular function regulator	Intracellular trafficking, secretion, and vesicular transport;General function prediction only	Endocytosis
Preprocathepsin cathepsin L OS=Fasciola gigantica OX=46835 GN=FGIG_09730 PE=3 SV=1	F.gigantica	tr|A0A504Y6Y7|A0A504Y6Y7_FASGI	4	2	13.8	326	36583.1	metabolic process	cellular anatomical entity	catalytic activity	General function prediction only;Function unknown	Autophagy - animal; Phagosome; Lysosome
Asparaginase OS=Fasciola gigantica OX=46835 GN=FGIG_01323 PE=4 SV=1	F.gigantica	tr|A0A504YPB6|A0A504YPB6_FASGI	2	2	4.817	519	56763.2	--	--	--	Amino acid transport and metabolism;Translation, ribosomal structure and biogenesis	--
Hydroxyacylglutathione mitochondrial OS=Fasciola gigantica OX=46835 GN=FGIG_03061 PE=3 SV=1	F.gigantica	tr|A0A504YWQ6|A0A504YWQ6_FASGI	2	2	7.663	261	28960.9	developmental process;cellular process;metabolic process;reproductive process	cellular anatomical entity	catalytic activity	General function prediction only	Pyruvate metabolism; Metabolic pathways
Glutathione S-transferase N-terminal domain OS=Fasciola gigantica OX=46835 GN=FGIG_07503 PE=4 SV=1	F.gigantica	tr|A0A504YK81|A0A504YK81_FASGI	1	1	5	160	18329.2	--	--	--	--	Hepatocellular carcinoma; Platinum drug resistance; Fluid shear stress and atherosclerosis; Drug metabolism - cytochrome P450; Chemical carcinogenesis - reactive oxygen species; Metabolism of xenobiotics by cytochrome P450; Metabolic pathways; Pathways in cancer; Chemical carcinogenesis - DNA adducts; Chemical carcinogenesis - receptor activation; Glutathione metabolism; Drug metabolism - other e…
Ribosomal protein OS=Fasciola gigantica OX=46835 GN=FGIG_11273 PE=3 SV=1	F.gigantica	tr|A0A504YSP9|A0A504YSP9_FASGI	1	1	11.06	208	23984.2	response to stimulus;viral process;cellular process;localization;biological regulation;metabolic process	cellular anatomical entity;protein-containing complex	structural molecule activity;binding	Translation, ribosomal structure and biogenesis	Ribosome
Citrate synthase OS=Fasciola gigantica OX=46835 GN=FGIG_04349 PE=3 SV=1	F.gigantica	tr|A0A504YU17|A0A504YU17_FASGI	2	2	5.97	469	51654.5	metabolic process;response to stimulus	cellular anatomical entity	binding;catalytic activity	Energy production and conversion	Metabolic pathways; Biosynthesis of amino acids; Carbon metabolism; Glyoxylate and dicarboxylate metabolism; Citrate cycle (TCA cycle); 2-Oxocarboxylic acid metabolism
Putative Ras-related protein Rab-10 OS=Fasciola gigantica OX=46835 GN=FGIG_06242 PE=2 SV=1	F.gigantica	tr|A0A3G4YQA0|A0A3G4YQA0_FASGI	2	2	10.24	205	23090.3	response to stimulus;biological regulation;cellular process;immune system process;localization	cellular anatomical entity	catalytic activity;binding	--	Endocytosis
Hypoxanthine-guanine phosphoribosyltransferase OS=Fasciola gigantica OX=46835 GN=FGIG_11634 PE=4 SV=1	F.gigantica	tr|A0A504YWI7|A0A504YWI7_FASGI	1	1	3.836	365	41850	metabolic process;developmental process;cellular process;response to stimulus	cellular anatomical entity	binding;catalytic activity	Nucleotide transport and metabolism	Metabolic pathways; Drug metabolism - other enzymes; Purine metabolism
Anoctamin OS=Fasciola gigantica OX=46835 GN=FGIG_09056 PE=3 SV=1	F.gigantica	tr|A0A504YWW1|A0A504YWW1_FASGI	1	1	1.916	835	95803.1	response to stimulus;biological regulation;localization;cellular process	cellular anatomical entity	transporter activity	--	--
DM9 domain-containing protein OS=Fasciola gigantica OX=46835 GN=FGIG_11523 PE=4 SV=1	F.gigantica	tr|A0A504YBL5|A0A504YBL5_FASGI	1	1	9.554	157	17446.6	--	--	--	--	--
Uncharacterized protein (Fragment) OS=Fasciola gigantica OX=46835 GN=FGIG_03525 PE=4 SV=1	F.gigantica	tr|A0A504YQI2|A0A504YQI2_FASGI	1	1	7.471	174	19624.3	--	--	--	--	--
Cardiac muscle alpha actin OS=Fasciola gigantica OX=46835 GN=FGIG_11050 PE=3 SV=1	F.gigantica	tr|A0A504YYH3|A0A504YYH3_FASGI	19	5	43.73	375	41696.3	--	cellular anatomical entity	binding	Cytoskeleton	Phagosome; Phototransduction - fly; Hippo signaling pathway - fly
T-complex protein 1 subunit delta OS=Fasciola gigantica OX=46835 GN=FGIG_01563 PE=3 SV=1	F.gigantica	tr|A0A504YLW7|A0A504YLW7_FASGI	1	1	2.407	540	58291.9	response to stimulus;reproductive process;localization;developmental process;cellular process	cellular anatomical entity;protein-containing complex	binding	Posttranslational modification, protein turnover, chaperones	--
Leucine-rich repeat-containing protein 23 OS=Fasciola gigantica OX=46835 GN=FGIG_07287 PE=4 SV=1	F.gigantica	tr|A0A504YJ46|A0A504YJ46_FASGI	1	1	4.595	370	41718.2	--	--	--	--	--
Ubiquitin conjugating enzyme variant OS=Fasciola gigantica OX=46835 GN=FGIG_08798 PE=4 SV=1	F.gigantica	tr|A0A504Y8J7|A0A504Y8J7_FASGI	2	2	13.42	149	16944.2	--	--	--	--	--
Tegumental protein OS=Fasciola gigantica OX=46835 GN=FGIG_00354 PE=4 SV=1	F.gigantica	tr|A0A504Y835|A0A504Y835_FASGI	3	3	23.56	174	20172.7	--	--	--	--	--
V-type proton ATPase subunit H OS=Fasciola gigantica OX=46835 GN=FGIG_02726 PE=3 SV=1	F.gigantica	tr|A0A504YTB2|A0A504YTB2_FASGI	1	1	2.347	426	49639.5	--	--	--	--	Metabolic pathways; mTOR signaling pathway; Oxidative phosphorylation; Phagosome; Lysosome
NADP-dependent glycerol dehydrogenase OS=Fasciola gigantica OX=46835 GN=FGIG_05761 PE=4 SV=1	F.gigantica	tr|A0A504Z1S1|A0A504Z1S1_FASGI	1	1	3.604	333	37545.1	--	--	catalytic activity	Secondary metabolites biosynthesis, transport and catabolism	Folate biosynthesis; Metabolic pathways; Galactose metabolism; Glycerolipid metabolism; Pentose and glucuronate interconversions; Fructose and mannose metabolism
Serine/threonine-protein kinase PAK OS=Fasciola gigantica OX=46835 GN=FGIG_05419 PE=3 SV=1	F.gigantica	tr|A0A504YKR3|A0A504YKR3_FASGI	1	1	2.917	480	54276.1	--	--	--	Cell wall/membrane/envelope biogenesis	--
Uncharacterized protein OS=Fasciola gigantica OX=46835 GN=FGIG_12305 PE=4 SV=1	F.gigantica	tr|A0A504Z038|A0A504Z038_FASGI	2	2	21.93	114	12607.5	metabolic process	--	--	--	Arginine and proline metabolism; Metabolic pathways; Biosynthesis of amino acids
Hsp90 chaperone protein kinase-targeting subunit OS=Fasciola gigantica OX=46835 GN=FGIG_06220 PE=3 SV=1	F.gigantica	tr|A0A504Z2F6|A0A504Z2F6_FASGI	1	1	2.494	401	46666.5	--	--	--	--	--
Voltage-dependent anion-selective channel protein 3 OS=Fasciola gigantica OX=46835 GN=FGIG_08900 PE=3 SV=1	F.gigantica	tr|A0A504YMY8|A0A504YMY8_FASGI	1	1	3.191	282	31812.2	localization;cellular process	cellular anatomical entity	--	--	--
Peptidase_M1_N domain-containing protein OS=Fasciola gigantica OX=46835 GN=FGIG_08037 PE=4 SV=1	F.gigantica	tr|A0A504YFS4|A0A504YFS4_FASGI	1	1	13.77	138	15523.8	--	--	catalytic activity	Amino acid transport and metabolism	--
Tryptophanyl-tRNA synthetase OS=Fasciola gigantica OX=46835 GN=FGIG_10324 PE=3 SV=1	F.gigantica	tr|A0A504YKT7|A0A504YKT7_FASGI	1	1	4.545	418	47851.8	cellular process;biological regulation;metabolic process	cellular anatomical entity	catalytic activity;binding	Translation, ribosomal structure and biogenesis	Aminoacyl-tRNA biosynthesis
Cullin-domain-containing protein OS=Fasciola gigantica OX=46835 GN=FGIG_11337 PE=3 SV=1	F.gigantica	tr|A0A504YPQ5|A0A504YPQ5_FASGI	1	1	2.672	524	60798.2	metabolic process;biological regulation;developmental process;cellular process;response to stimulus;reproductive process	cellular anatomical entity;protein-containing complex	binding	--	Ubiquitin mediated proteolysis; Nucleotide excision repair
Myosin-XV OS=Fasciola gigantica OX=46835 GN=FGIG_03967 PE=3 SV=1	F.gigantica	tr|A0A504Z065|A0A504Z065_FASGI	1	1	0.7004	1999	225821	--	cellular anatomical entity	binding	--	--
Dynein light chain OS=Fasciola gigantica OX=46835 GN=FGIG_11504 PE=3 SV=1	F.gigantica	tr|A0A504YTL8|A0A504YTL8_FASGI	1	1	13.48	89	10340.8	metabolic process;biological regulation;immune system process;cellular process;localization	protein-containing complex;cellular anatomical entity	binding;cytoskeletal motor activity	--	Salmonella infection
Thimet oligopeptidase (M03 family) OS=Fasciola gigantica OX=46835 GN=FGIG_08125 PE=3 SV=1	F.gigantica	tr|A0A504YVZ5|A0A504YVZ5_FASGI	1	1	6.593	182	21442.7	cellular process;biological regulation;metabolic process	--	catalytic activity;binding	Posttranslational modification, protein turnover, chaperones	--
CCT-theta OS=Fasciola gigantica OX=46835 GN=FGIG_09793 PE=3 SV=1	F.gigantica	tr|A0A504YNF9|A0A504YNF9_FASGI	1	1	1.259	1112	122495	cellular process;behavior;biological regulation;multicellular organismal process	protein-containing complex;cellular anatomical entity	binding;catalytic activity	Posttranslational modification, protein turnover, chaperones	--
Cullin-1 OS=Fasciola gigantica OX=46835 GN=FGIG_09784 PE=3 SV=1	F.gigantica	tr|A0A504YQM7|A0A504YQM7_FASGI	1	1	1.382	868	99403.1	response to stimulus;metabolic process;biological regulation;developmental process;immune system process;cellular process	protein-containing complex;cellular anatomical entity	binding;catalytic activity	--	Protein processing in endoplasmic reticulum; TGF-beta signaling pathway; Oocyte meiosis; Wnt signaling pathway; Ubiquitin mediated proteolysis; Cell cycle; Hedgehog signaling pathway
SOCS box domain-containing protein OS=Fasciola gigantica OX=46835 GN=FGIG_02852 PE=4 SV=1	F.gigantica	tr|A0A504Z3E6|A0A504Z3E6_FASGI	1	1	3.302	424	49024.6	--	--	--	--	--
Restin OS=Fasciola gigantica OX=46835 GN=FGIG_07807 PE=4 SV=1	F.gigantica	tr|A0A504Y7Z3|A0A504Y7Z3_FASGI	1	1	2.297	566	61874.9	--	--	--	--	--
Glycerol-3-phosphate dehydrogenase [NAD(+)] OS=Fasciola gigantica OX=46835 GN=FGIG_11732 PE=3 SV=1	F.gigantica	tr|A0A504YLE5|A0A504YLE5_FASGI	1	1	5.698	351	38696.5	response to stimulus;biological regulation;metabolic process;cellular process	protein-containing complex;cellular anatomical entity	binding;catalytic activity	Energy production and conversion	Glycerophospholipid metabolism
LanC protein 1 OS=Fasciola gigantica OX=46835 GN=FGIG_04576 PE=4 SV=1	F.gigantica	tr|A0A504YRP7|A0A504YRP7_FASGI	1	1	6.452	279	30884.9	--	--	--	--	--
Succinate dehydrogenase cytochrome b560 subunit, mitochondrial OS=Fasciola gigantica OX=46835 GN=FGIG_04170 PE=3 SV=1	F.gigantica	tr|A0A504YDU0|A0A504YDU0_FASGI	1	1	6.404	203	22654.5	metabolic process;cellular process	cellular anatomical entity;protein-containing complex	catalytic activity	Energy production and conversion	Oxidative phosphorylation; Metabolic pathways; Carbon metabolism; Citrate cycle (TCA cycle)
Transforming growth factor-beta-induced protein ig-h3 (Fragment) OS=Fasciola gigantica OX=46835 GN=FGIG_09414 PE=4 SV=1	F.gigantica	tr|A0A504YAW2|A0A504YAW2_FASGI	1	1	2.491	562	64182.2	cellular process;multicellular organismal process	cellular anatomical entity	binding	General function prediction only	--
NAD(+) kinase OS=Fasciola gigantica OX=46835 GN=FGIG_04961 PE=3 SV=1	F.gigantica	tr|A0A504YEN6|A0A504YEN6_FASGI	1	1	6.047	215	24246.8	metabolic process;cellular process	cellular anatomical entity	catalytic activity;binding	Coenzyme transport and metabolism	Nicotinate and nicotinamide metabolism; Metabolic pathways; Biosynthesis of cofactors
Multi-domain cystatin OS=Fasciola gigantica OX=46835 GN=FGIG_02520 PE=4 SV=1	F.gigantica	tr|A0A504ZA07|A0A504ZA07_FASGI	16	1	18.93	1083	124545	biological regulation	--	molecular function regulator	--	--
Fructose-bisphosphatase OS=Fasciola gigantica OX=46835 GN=FGIG_00371 PE=3 SV=1	F.gigantica	tr|A0A504XEA1|A0A504XEA1_FASGI	10	1	43.45	290	31263.5	metabolic process;cellular process	--	binding;catalytic activity	Carbohydrate transport and metabolism	Glycolysis / Gluconeogenesis; Carbon metabolism; Metabolic pathways; Fructose and mannose metabolism; Pentose phosphate pathway
Putative pyridine nucleotide-disulfide oxidoreductase OS=Fasciola gigantica OX=46835 GN=FGIG_02962 PE=3 SV=1	F.gigantica	tr|A0A504YZM6|A0A504YZM6_FASGI	9	1	28.47	541	60473.2	metabolic process;biological regulation;cellular process;response to stimulus	cellular anatomical entity	antioxidant activity;binding;catalytic activity	Energy production and conversion	Selenocompound metabolism
Myoferlin OS=Fasciola gigantica OX=46835 GN=FGIG_10120 PE=4 SV=1	F.gigantica	tr|A0A504YZZ6|A0A504YZZ6_FASGI	2	1	4.63	540	62272.8	response to stimulus;cellular process;biological regulation;multicellular organismal process	cellular anatomical entity	binding	--	--
Tau-tubulin kinase 1 OS=Fasciola gigantica OX=46835 GN=FGIG_00808 PE=4 SV=1	F.gigantica	tr|A0A504YSG4|A0A504YSG4_FASGI	1	1	0.5369	1490	165896	biological regulation;metabolic process;developmental process;cellular process	cellular anatomical entity	binding;catalytic activity	Posttranslational modification, protein turnover, chaperones;Cell motility;Transcription;Cell wall/membrane/envelope biogenesis;Extracellular structures	--
Membrane-associated phosphatidylinositol transfer protein 1 OS=Fasciola gigantica OX=46835 GN=FGIG_00740 PE=3 SV=1	F.gigantica	tr|A0A504Z140|A0A504Z140_FASGI	1	1	1.109	1262	140793	--	cellular anatomical entity	binding	Lipid transport and metabolism	--
Tegument antigen OS=Fasciola gigantica OX=46835 GN=FGIG_04680 PE=4 SV=1	F.gigantica	tr|A0A504YFG3|A0A504YFG3_FASGI	1	1	6.383	188	21178.1	--	--	--	--	--
N-myc downstream regulated OS=Fasciola gigantica OX=46835 GN=FGIG_01277 PE=3 SV=1	F.gigantica	tr|A0A504Z8I5|A0A504Z8I5_FASGI	1	1	4.533	353	39651.1	--	--	--	--	--
Putative oxidoreductase YjmC (Fragment) OS=Fasciola gigantica OX=46835 GN=FGIG_05062 PE=4 SV=1	F.gigantica	tr|A0A504Z4X6|A0A504Z4X6_FASGI	1	1	12.37	186	20126.9	--	--	catalytic activity	Energy production and conversion	--
Cullin-associated and neddylation-dissociated protein 1 OS=Fasciola gigantica OX=46835 GN=FGIG_04346 PE=3 SV=1	F.gigantica	tr|A0A504YTD9|A0A504YTD9_FASGI	1	1	5.932	236	25910.6	--	--	--	--	--
C-type lectin domain-containing protein OS=Fasciola gigantica OX=46835 GN=FGIG_03460 PE=4 SV=1	F.gigantica	tr|A0A504YMB3|A0A504YMB3_FASGI	1	1	3.472	432	46575.1	--	--	--	--	--
Uncharacterized protein (Fragment) OS=Fasciola gigantica OX=46835 GN=FGIG_08085 PE=3 SV=1	F.gigantica	tr|A0A504YX05|A0A504YX05_FASGI	1	1	3.976	327	36454.4	--	--	--	--	--
Actin-related protein 2 OS=Fasciola gigantica OX=46835 GN=FGIG_09590 PE=3 SV=1	F.gigantica	tr|A0A504Z168|A0A504Z168_FASGI	1	1	5.809	241	26910.9	cellular process;immune system process;reproductive process;metabolic process;biological regulation;multicellular organismal process;developmental process;behavior;localization;response to stimulus;locomotion	protein-containing complex;cellular anatomical entity	structural molecule activity;binding;catalytic activity	Cytoskeleton	Tight junction; Regulation of actin cytoskeleton; Salmonella infection; Endocytosis
Uncharacterized protein OS=Fasciola gigantica OX=46835 GN=FGIG_07938 PE=4 SV=1	F.gigantica	tr|A0A504YTG7|A0A504YTG7_FASGI	1	1	10.71	84	9619.2	--	--	--	--	--
Methylmalonyl-CoA epimerase /ethylmalonyl-CoA epimerase OS=Fasciola gigantica OX=46835 GN=FGIG_09463 PE=3 SV=1	F.gigantica	tr|A0A504YLH9|A0A504YLH9_FASGI	1	1	10	150	16273.6	cellular process;metabolic process	cellular anatomical entity	binding;catalytic activity	Secondary metabolites biosynthesis, transport and catabolism;Amino acid transport and metabolism;General function prediction only	Metabolic pathways; Carbon metabolism; Propanoate metabolism; Glyoxylate and dicarboxylate metabolism; Valine, leucine and isoleucine degradation
Lysosomal alpha-glucosidase OS=Fasciola gigantica OX=46835 GN=FGIG_05015 PE=3 SV=1	F.gigantica	tr|A0A504YSY0|A0A504YSY0_FASGI	2	2	1.967	1322	149139	--	--	--	Carbohydrate transport and metabolism	--
Receptor Mediated Endocytosis OS=Fasciola gigantica OX=46835 GN=FGIG_02145 PE=4 SV=1	F.gigantica	tr|A0A504Z6J5|A0A504Z6J5_FASGI	1	1	2.198	546	62259	developmental process;cellular process;localization;metabolic process;biological regulation;multicellular organismal process;reproductive process	cellular anatomical entity	catalytic activity;binding	General function prediction only	Endocytosis
Neurogenic locus notch protein OS=Fasciola gigantica OX=46835 GN=FGIG_09480 PE=4 SV=1	F.gigantica	tr|A0A504YDC1|A0A504YDC1_FASGI	2	2	3.729	885	96931.1	--	--	--	--	--
Eukaryotic polypeptide chain release factor 3 OS=Fasciola gigantica OX=46835 GN=FGIG_12020 PE=4 SV=1	F.gigantica	tr|A0A504YDN6|A0A504YDN6_FASGI	1	1	3.048	525	57960.1	metabolic process;biological regulation;cellular process	protein-containing complex	binding;translation regulator activity;catalytic activity	Translation, ribosomal structure and biogenesis	mRNA surveillance pathway
Tubulin alpha chain OS=Fasciola gigantica OX=46835 GN=FGIG_10904 PE=3 SV=1	F.gigantica	tr|A0A504YSA5|A0A504YSA5_FASGI	4	3	10.51	514	57205.4	localization;cellular process	cellular anatomical entity	catalytic activity;binding;structural molecule activity	--	Phagosome
Serine/threonine-protein phosphatase (Fragment) OS=Fasciola gigantica OX=46835 GN=FGIG_03259 PE=3 SV=1	F.gigantica	tr|A0A504ZA83|A0A504ZA83_FASGI	1	1	6.545	275	31306.3	cellular process;developmental process;metabolic process;biological regulation;multicellular organismal process;rhythmic process;reproductive process	protein-containing complex;cellular anatomical entity	binding;catalytic activity	Signal transduction mechanisms	mRNA surveillance pathway
RNA helicase (Fragment) OS=Fasciola gigantica OX=46835 GN=FGIG_06845 PE=3 SV=1	F.gigantica	tr|A0A504YVI8|A0A504YVI8_FASGI	1	1	2.055	584	64277.5	response to stimulus;localization;cellular process;immune system process;biological process involved in interspecies interaction between organisms;metabolic process;biological regulation	protein-containing complex;cellular anatomical entity	binding;ATP-dependent activity;catalytic activity	Replication, recombination and repair	RIG-I-like receptor signaling pathway
Antigen Sm21.7 OS=Fasciola gigantica OX=46835 GN=FGIG_04469 PE=4 SV=1	F.gigantica	tr|A0A504Z3Y4|A0A504Z3Y4_FASGI	1	1	9.827	173	20369	--	--	--	--	--
Phospholipase B-like OS=Fasciola gigantica OX=46835 GN=FGIG_03241 PE=3 SV=1	F.gigantica	tr|A0A504YRJ4|A0A504YRJ4_FASGI	1	1	3.125	416	47893.3	--	cellular anatomical entity	--	--	--
Dymeclin OS=Fasciola gigantica OX=46835 GN=FGIG_08782 PE=3 SV=1	F.gigantica	tr|A0A504YI21|A0A504YI21_FASGI	1	1	1.534	717	79514.5	developmental process;cellular process	cellular anatomical entity	binding	--	--
Sulfotransferase 1B1 OS=Fasciola gigantica OX=46835 GN=FGIG_07300 PE=4 SV=1	F.gigantica	tr|A0A504YB96|A0A504YB96_FASGI	1	1	3.659	328	38702.6	--	--	--	--	Chemical carcinogenesis - DNA adducts
Otoferlin OS=Fasciola gigantica OX=46835 GN=FGIG_02913 PE=4 SV=1	F.gigantica	tr|A0A504Y938|A0A504Y938_FASGI	1	1	1.22	574	65923.2	multicellular organismal process;localization;cellular process	cellular anatomical entity	binding	--	--
Bis(5'-adenosyl)-triphosphatase enpp4 OS=Fasciola gigantica OX=46835 GN=FGIG_04533 PE=4 SV=1	F.gigantica	tr|A0A504Z581|A0A504Z581_FASGI	1	1	5.08	374	42827.7	--	--	--	Signal transduction mechanisms	--
Neurogenic locus notch protein (Fragment) OS=Fasciola gigantica OX=46835 GN=FGIG_12691 PE=4 SV=1	F.gigantica	tr|A0A504YES4|A0A504YES4_FASGI	2	2	16.99	153	17347.1	--	--	--	--	--
N-acetyltransferase domain-containing protein (Fragment) OS=Fasciola gigantica OX=46835 GN=FGIG_12359 PE=4 SV=1	F.gigantica	tr|A0A504YGW7|A0A504YGW7_FASGI	1	1	4.478	335	38612	--	--	--	--	Metabolic pathways; Arginine and proline metabolism; Ferroptosis
Major vault protein OS=Fasciola gigantica OX=46835 GN=FGIG_01701 PE=4 SV=1	F.gigantica	tr|A0A504Y9P3|A0A504Y9P3_FASGI	1	1	1.91	890	99761.6	cellular process;developmental process;localization;biological regulation;response to stimulus	protein-containing complex;cellular anatomical entity	binding	--	--
N-alpha-acetyltransferase 25 NatB auxiliary subunit OS=Fasciola gigantica OX=46835 GN=FGIG_09452 PE=3 SV=1	F.gigantica	tr|A0A504Y5A1|A0A504Y5A1_FASGI	1	1	1.141	1052	118641	reproduction;developmental process;cellular process;immune system process;multicellular organismal process;response to stimulus	cellular anatomical entity	--	--	--
Histone H3 OS=Fasciola gigantica OX=46835 GN=FGIG_11889 PE=3 SV=1; Histone H3 OS=Fasciola gigantica OX=46835 GN=FGIG_02444 PE=3 SV=1; Histone H3 OS=Fasciola gigantica OX=46835 GN=FGIG_02582 PE=3 SV=1; Histone H3 OS=Fasciola gigantica OX=46835 GN=FGIG_11978 PE=3 SV=1	F.gigantica	tr|A0A504YMJ0|A0A504YMJ0_FASGI;tr|A0A504YJX2|A0A504YJX2_FASGI;tr|A0A504YB20|A0A504YB20_FASGI;tr|A0A504Y574|A0A504Y574_FASGI	1	1	5.738	122	13580.7	response to stimulus;developmental process;biological regulation;metabolic process;multicellular organismal process;biological adhesion;reproductive process;growth;cellular process	cellular anatomical entity;protein-containing complex	binding	--	Transcriptional misregulation in cancer; Neutrophil extracellular trap formation; Alcoholism; Systemic lupus erythematosus
Corrinoid adenosyltransferase OS=Fasciola gigantica OX=46835 GN=FGIG_12412 PE=3 SV=1	F.gigantica	tr|A0A504YZK9|A0A504YZK9_FASGI	1	1	3.704	270	30009.2	metabolic process;cellular process	cellular anatomical entity	catalytic activity	Coenzyme transport and metabolism	Biosynthesis of cofactors; Porphyrin and chlorophyll metabolism; Metabolic pathways
Microsomal glutathione transferase OS=Fasciola gigantica OX=46835 GN=FGIG_08270 PE=4 SV=1	F.gigantica	tr|A0A504YFR4|A0A504YFR4_FASGI	1	1	7.429	175	19525.1	--	cellular anatomical entity	catalytic activity	--	Drug metabolism - cytochrome P450; Drug metabolism - other enzymes; Metabolism of xenobiotics by cytochrome P450; Metabolic pathways; Glutathione metabolism
Glucose transporter OS=Fasciola gigantica OX=46835 PE=2 SV=1	F.gigantica	tr|I6Z120|I6Z120_FASGI	2	2	5.149	505	54328.4	cellular process;localization;response to stimulus	cellular anatomical entity	binding;transporter activity	Inorganic ion transport and metabolism;General function prediction only;Amino acid transport and metabolism	--
Dynein molecular motor protein light chain (Fragment) OS=Fasciola gigantica OX=46835 GN=FGIG_08392 PE=3 SV=1	F.gigantica	tr|A0A504YIZ0|A0A504YIZ0_FASGI	1	1	8.939	179	19832.5	viral process;developmental process;cellular process;localization;biological regulation;biological process involved in interspecies interaction between organisms;multi-organism process	cellular anatomical entity;protein-containing complex	binding;cytoskeletal motor activity	--	--
Uncharacterized protein OS=Fasciola gigantica OX=46835 GN=FGIG_02370 PE=4 SV=1	F.gigantica	tr|A0A504Y4W0|A0A504Y4W0_FASGI	1	1	3.398	412	45222.1	--	--	--	--	--
Putative neutral sphingomyelinase (Fragment) OS=Fasciola gigantica OX=46835 GN=FGIG_06991 PE=3 SV=1	F.gigantica	tr|A0A504Z0W4|A0A504Z0W4_FASGI	1	1	3.302	212	23915.5	--	--	--	--	Metabolic pathways; Sphingolipid metabolism
Tetraspanin OS=Fasciola gigantica OX=46835 GN=FGIG_01662 PE=3 SV=1	F.gigantica	tr|A0A504YIB2|A0A504YIB2_FASGI	1	1	8.072	223	24199.6	biological regulation;localization;cellular process;response to stimulus	cellular anatomical entity	--	--	--
Putative mediator of cell motility 1 OS=Fasciola gigantica OX=46835 GN=FGIG_08836 PE=3 SV=1	F.gigantica	tr|A0A504YHB5|A0A504YHB5_FASGI	1	1	7.862	318	36463.1	biological regulation	cellular anatomical entity	binding	--	--
SCP domain-containing protein OS=Fasciola gigantica OX=46835 GN=FGIG_01007 PE=4 SV=1	F.gigantica	tr|A0A504YIP0|A0A504YIP0_FASGI	2	2	12.17	189	21616.8	--	--	--	--	--
Dysferlin limb girdle muscular dystrophy 2B OS=Fasciola gigantica OX=46835 GN=FGIG_08768 PE=4 SV=1	F.gigantica	tr|A0A504YLF9|A0A504YLF9_FASGI	3	3	13.94	251	28564.9	response to stimulus;multicellular organismal process;cellular process;developmental process	cellular anatomical entity	binding	--	--
Uncharacterized protein OS=Fasciola gigantica OX=46835 GN=FGIG_12183 PE=4 SV=1	F.gigantica	tr|A0A504Y6B9|A0A504Y6B9_FASGI	1	1	5.625	320	36858.2	--	--	--	--	--
CUB domain-containing protein OS=Fasciola gigantica OX=46835 GN=FGIG_07991 PE=4 SV=1	F.gigantica	tr|A0A504YUL5|A0A504YUL5_FASGI	1	1	5.306	245	26863	--	--	--	--	--
Serine hydroxymethyltransferase OS=Fasciola gigantica OX=46835 GN=FGIG_10407 PE=3 SV=1	F.gigantica	tr|A0A504Y698|A0A504Y698_FASGI	1	1	2.091	526	56888.5	metabolic process;cellular process	cellular anatomical entity	binding;catalytic activity	Amino acid transport and metabolism	Metabolic pathways; Biosynthesis of cofactors; Biosynthesis of amino acids; Glycine, serine and threonine metabolism; Carbon metabolism; Glyoxylate and dicarboxylate metabolism; One carbon pool by folate
Cathepsin B8 OS=Fasciola gigantica OX=46835 GN=CB8 PE=2 SV=1	F.gigantica	tr|A0A6C0GX91|A0A6C0GX91_FASGI	1	1	4.058	345	38304.4	--	--	--	Function unknown	Autophagy - animal; Apoptosis; Lysosome; NOD-like receptor signaling pathway
Uncharacterized protein OS=Fasciola gigantica OX=46835 GN=FGIG_02706 PE=4 SV=1	F.gigantica	tr|A0A504YFQ1|A0A504YFQ1_FASGI	1	1	1.269	1340	145309	--	--	--	--	--
CD59 protein OS=Fasciola gigantica OX=46835 GN=FGIG_08043 PE=4 SV=1	F.gigantica	tr|A0A504Z108|A0A504Z108_FASGI	2	2	18.85	122	13523.5	--	--	--	--	--
Very-long-chain (3R)-3-hydroxyacyl-CoA dehydratase OS=Fasciola gigantica OX=46835 GN=FGIG_06755 PE=3 SV=1	F.gigantica	tr|A0A504YH50|A0A504YH50_FASGI	2	2	3.505	856	98748.9	biological regulation;metabolic process;cellular process	cellular anatomical entity	catalytic activity	--	Fatty acid elongation; Fatty acid metabolism; Metabolic pathways; Biosynthesis of unsaturated fatty acids
Bcl-2 ous antagonist/killer OS=Fasciola gigantica OX=46835 GN=FGIG_03557 PE=3 SV=1	F.gigantica	tr|A0A504YA45|A0A504YA45_FASGI	1	1	9.565	115	13395.5	response to stimulus;developmental process;cellular process;localization;biological regulation;metabolic process	cellular anatomical entity;protein-containing complex	binding	--	Protein processing in endoplasmic reticulum; Salmonella infection; Herpes simplex virus 1 infection; Influenza A; Apoptosis
Neuroserpin OS=Fasciola gigantica OX=46835 GN=FGIG_01893 PE=3 SV=1	F.gigantica	tr|A0A504YR08|A0A504YR08_FASGI	1	1	2.703	407	45990.8	--	--	--	Posttranslational modification, protein turnover, chaperones	--
NAD-dependent protein deacylase OS=Fasciola gigantica OX=46835 GN=FGIG_06265 PE=3 SV=1	F.gigantica	tr|A0A504YU22|A0A504YU22_FASGI	1	1	4.967	302	33447.9	biological regulation;metabolic process;cellular process;response to stimulus	cellular anatomical entity	binding;catalytic activity	Posttranslational modification, protein turnover, chaperones	Nicotinate and nicotinamide metabolism; Metabolic pathways
Glucose-6-phosphate 1-dehydrogenase OS=Fasciola gigantica OX=46835 GN=FGIG_12117 PE=4 SV=1	F.gigantica	tr|A0A504YF98|A0A504YF98_FASGI	1	1	3.766	239	26927.7	metabolic process	--	catalytic activity;binding	Carbohydrate transport and metabolism	Glutathione metabolism; Metabolic pathways; Carbon metabolism; Pentose phosphate pathway
Tubulin beta chain OS=Fasciola gigantica OX=46835 GN=FGIG_04371 PE=3 SV=1	F.gigantica	tr|A0A504YC73|A0A504YC73_FASGI	10	3	22.92	445	49860.8	--	--	--	--	Phagosome
UDP-n-acetylglucosamine pyrophosphorylase OS=Fasciola gigantica OX=46835 GN=FGIG_06238 PE=4 SV=1	F.gigantica	tr|A0A504YH72|A0A504YH72_FASGI	1	1	2.06	534	59735.1	metabolic process	--	catalytic activity	Carbohydrate transport and metabolism	--
Glucose-regulated protein 94 OS=Fasciola gigantica OX=46835 GN=FGIG_08009 PE=3 SV=1	F.gigantica	tr|A0A504Z041|A0A504Z041_FASGI	3	1	3.423	818	92318	biological regulation;metabolic process;multicellular organismal process;cellular process;developmental process;localization;response to stimulus	--	binding	Posttranslational modification, protein turnover, chaperones	Protein processing in endoplasmic reticulum
Dihydropyrimidinase OS=Fasciola gigantica OX=46835 GN=FGIG_05637 PE=3 SV=1	F.gigantica	tr|A0A504YJY0|A0A504YJY0_FASGI	1	1	1.19	588	64675.3	cellular process;metabolic process	cellular anatomical entity	catalytic activity;binding	Nucleotide transport and metabolism	--

## Sheet: A1W14
Names	Species	Acc	#Peptide	#Unique Peptide	Coverage(%)	Length	Mass	GO function(Biological Process)	GO function(Cellular Component)	GO function(Molecular Function)	COG_function	Kegg_function
L-plastin OS=Fasciola gigantica OX=46835 GN=FGIG_03928 PE=4 SV=1	F.gigantica	tr|A0A504YSL7|A0A504YSL7_FASGI	81	81	78.31	650	73873.6	cellular process;reproductive process	cellular anatomical entity	binding	--	--
Alpha-actinin sarcomeric OS=Fasciola gigantica OX=46835 GN=FGIG_01730 PE=4 SV=1	F.gigantica	tr|A0A504WV76|A0A504WV76_FASGI	43	41	72.1	423	49371.2	multicellular organismal process;biological regulation;behavior;cellular process;response to stimulus	cellular anatomical entity	binding	--	--
Glutamate dehydrogenase OS=Fasciola gigantica OX=46835 GN=FGIG_08468 PE=3 SV=1	F.gigantica	tr|A0A504YK79|A0A504YK79_FASGI	35	35	61.61	534	58745	multicellular organismal process;biological regulation;metabolic process;cellular process;developmental process;behavior;response to stimulus	cellular anatomical entity	catalytic activity;binding	Amino acid transport and metabolism	Metabolic pathways; Carbon metabolism; Arginine biosynthesis; Proximal tubule bicarbonate reclamation; Alanine, aspartate and glutamate metabolism; Nitrogen metabolism; Necroptosis
Phosphoenolpyruvate carboxykinase (GTP) OS=Fasciola gigantica OX=46835 GN=FGIG_03867 PE=3 SV=1	F.gigantica	tr|A0A504YUP2|A0A504YUP2_FASGI	38	38	66.73	550	61415.2	metabolic process	cellular anatomical entity	catalytic activity;binding	Energy production and conversion	Citrate cycle (TCA cycle); FoxO signaling pathway; Pyruvate metabolism; Metabolic pathways; Glycolysis / Gluconeogenesis
Ubiquitin activating enzyme OS=Fasciola gigantica OX=46835 GN=FGIG_01883 PE=3 SV=1	F.gigantica	tr|A0A504Y452|A0A504Y452_FASGI	31	31	37.33	1077	120430	developmental process;cellular process;metabolic process;response to stimulus	cellular anatomical entity	binding;catalytic activity	Inorganic ion transport and metabolism	Ubiquitin mediated proteolysis
Alpha-1,4 glucan phosphorylase OS=Fasciola gigantica OX=46835 GN=FGIG_01694 PE=3 SV=1	F.gigantica	tr|A0A504YK53|A0A504YK53_FASGI	28	28	41.19	840	96630.7	metabolic process;biological regulation;cellular process	cellular anatomical entity	catalytic activity;binding	Carbohydrate transport and metabolism	Starch and sucrose metabolism; Metabolic pathways
Heat shock protein heat shock protein 90 alpha OS=Fasciola gigantica OX=46835 GN=FGIG_08056 PE=3 SV=1	F.gigantica	tr|A0A504YG42|A0A504YG42_FASGI	31	29	43.21	722	82427.7	reproductive process;biological adhesion;biological process involved in interspecies interaction between organisms;immune system process;cellular process;response to stimulus;locomotion;biological regulation;developmental process;localization	cellular anatomical entity;protein-containing complex	molecular function regulator;catalytic activity;binding	Posttranslational modification, protein turnover, chaperones	Progesterone-mediated oocyte maturation; Antigen processing and presentation; Prostate cancer; Necroptosis; PI3K-Akt signaling pathway; Salmonella infection; Fluid shear stress and atherosclerosis; Chemical carcinogenesis - receptor activation; Estrogen signaling pathway; Pathways in cancer; Protein processing in endoplasmic reticulum; Th17 cell differentiation; Lipid and atherosclerosis; IL-17 s…
Thioredoxin peroxidase 1 OS=Fasciola gigantica OX=46835 GN=TPx-1 PE=2 SV=1; Thiol-specific antioxidant OS=Fasciola gigantica OX=46835 GN=FGIG_06158 PE=4 SV=1	F.gigantica	tr|C7EAA3|C7EAA3_FASGI;tr|A0A504YJL0|A0A504YJL0_FASGI	30	30	82.57	218	24632.9	cellular process;detoxification	cellular anatomical entity	antioxidant activity;catalytic activity	Defense mechanisms	Peroxisome
Heat shock protein 70 OS=Fasciola hepatica OX=6192 GN=HSP70 PE=2 SV=1; Heat shock protein 70 OS=Fasciola gigantica OX=46835 GN=HSP70 PE=2 SV=1	F.gigantica	tr|B1NI98|B1NI98_FASHE;tr|B1NI97|B1NI97_FASGI	23	23	33.64	645	70752.1	growth;biological regulation;metabolic process;localization;developmental process;cellular process	cellular anatomical entity;protein-containing complex	catalytic activity;binding	Posttranslational modification, protein turnover, chaperones	Protein processing in endoplasmic reticulum; Spliceosome; Endocytosis
Propanoyl-CoA:carbon dioxide ligase subunit alpha OS=Fasciola gigantica OX=46835 GN=FGIG_07092 PE=4 SV=1	F.gigantica	tr|A0A504YJJ4|A0A504YJJ4_FASGI	24	24	37.6	750	82609	cellular process;metabolic process	cellular anatomical entity	catalytic activity;binding	Lipid transport and metabolism	Metabolic pathways; Carbon metabolism; Propanoate metabolism; Glyoxylate and dicarboxylate metabolism; Valine, leucine and isoleucine degradation
Propionyl-CoA carboxylase beta chain OS=Fasciola gigantica OX=46835 GN=FGIG_01539 PE=4 SV=1	F.gigantica	tr|A0A504YAE5|A0A504YAE5_FASGI	24	24	50.09	535	58544.9	cellular process;metabolic process	cellular anatomical entity;protein-containing complex	catalytic activity;binding	Lipid transport and metabolism	Carbon metabolism; Propanoate metabolism; Metabolic pathways; Valine, leucine and isoleucine degradation; Glyoxylate and dicarboxylate metabolism
Leucine amino peptidase OS=Fasciola gigantica OX=46835 PE=2 SV=1	F.gigantica	tr|C6KGZ9|C6KGZ9_FASGI	22	22	48.76	523	56384.1	--	--	--	Amino acid transport and metabolism	Metabolic pathways; Glutathione metabolism
Oxoglutarate dehydrogenase (succinyl-transferring) OS=Fasciola gigantica OX=46835 GN=FGIG_04989 PE=3 SV=1	F.gigantica	tr|A0A504Z421|A0A504Z421_FASGI	19	19	22.58	1054	119538	metabolic process;multicellular organismal process;cellular process;developmental process;locomotion	protein-containing complex;cellular anatomical entity	binding;catalytic activity	Energy production and conversion	Citrate cycle (TCA cycle); Carbon metabolism; Metabolic pathways
6-phosphogluconate dehydrogenase, decarboxylating OS=Fasciola gigantica OX=46835 GN=FGIG_04067 PE=3 SV=1	F.gigantica	tr|A0A504Z133|A0A504Z133_FASGI	22	22	56.16	495	54361.1	cellular process;metabolic process	cellular anatomical entity	catalytic activity;binding	Carbohydrate transport and metabolism	Glutathione metabolism; Metabolic pathways; Carbon metabolism; Pentose phosphate pathway
Malic enzyme OS=Fasciola gigantica OX=46835 GN=FGIG_09437 PE=3 SV=1	F.gigantica	tr|A0A504YH77|A0A504YH77_FASGI	23	23	45.89	584	63743.6	response to stimulus;cellular process;biological regulation;metabolic process	cellular anatomical entity	binding;catalytic activity	Energy production and conversion	Pyruvate metabolism; Carbon metabolism; Metabolic pathways
Severin OS=Fasciola gigantica OX=46835 GN=FGIG_09162 PE=4 SV=1	F.gigantica	tr|A0A504Z761|A0A504Z761_FASGI	20	20	56.99	379	43100.3	--	--	--	--	--
Multi-domain cystatin OS=Fasciola gigantica OX=46835 GN=MDC PE=2 SV=1	F.gigantica	tr|A0A097GX18|A0A097GX18_FASGI	22	2	17.06	1489	170946	biological regulation	--	molecular function regulator	--	--
Severin OS=Fasciola gigantica OX=46835 GN=FGIG_02947 PE=4 SV=1	F.gigantica	tr|A0A504YFI9|A0A504YFI9_FASGI	22	22	63.14	407	47394.3	--	--	--	--	--
Alpha-actinin isoform B (Fragment) OS=Fasciola gigantica OX=46835 GN=FGIG_09027 PE=4 SV=1	F.gigantica	tr|A0A504Y787|A0A504Y787_FASGI	23	23	58.77	342	39289.7	response to stimulus;biological regulation;localization;cellular process	protein-containing complex;cellular anatomical entity	binding;transcription regulator activity	--	--
Protein disulfide-isomerase OS=Fasciola gigantica OX=46835 GN=FGIG_01161 PE=3 SV=1	F.gigantica	tr|A0A504Z0Y0|A0A504Z0Y0_FASGI	20	20	44.79	489	55181.4	--	--	--	Posttranslational modification, protein turnover, chaperones	Protein processing in endoplasmic reticulum
14-3-3 protein OS=Fasciola gigantica OX=46835 PE=2 SV=1	F.gigantica	tr|Q5FX78|Q5FX78_FASGI	21	11	74.21	252	28741.4	biological adhesion;response to stimulus;biological regulation;cellular process;localization	protein-containing complex;cellular anatomical entity	binding;catalytic activity	--	PI3K-Akt signaling pathway; Hippo signaling pathway; Hepatitis C; Oocyte meiosis; Cell cycle; Viral carcinogenesis; Hepatitis B
Dynein heavy chain 1 cytosolic OS=Fasciola gigantica OX=46835 GN=FGIG_00108 PE=3 SV=1	F.gigantica	tr|A0A504YKS2|A0A504YKS2_FASGI	13	13	3.815	4744	541069	localization;cellular process;immune system process	protein-containing complex;cellular anatomical entity	ATP-dependent activity;catalytic activity;cytoskeletal motor activity;binding	--	Phagosome; Salmonella infection; Vasopressin-regulated water reabsorption
Cytoplasmic actin OS=Fasciola gigantica OX=46835 GN=FGIG_11109 PE=3 SV=1	F.gigantica	tr|A0A504Y6H5|A0A504Y6H5_FASGI	18	3	46.54	376	41645.2	multicellular organismal process;localization;developmental process;cellular process;growth;locomotion;reproductive process	cellular anatomical entity	binding	Cytoskeleton	Apoptosis; Focal adhesion; Salmonella infection; Regulation of actin cytoskeleton; Tight junction; Adherens junction; Phagosome
Glyceraldehyde-3-phosphate dehydrogenase OS=Fasciola gigantica OX=46835 GN=FGIG_06798 PE=3 SV=1	F.gigantica	tr|A0A504YCL4|A0A504YCL4_FASGI	16	16	59.64	337	36542.6	metabolic process;cellular process	--	catalytic activity;binding	Carbohydrate transport and metabolism	Glycolysis / Gluconeogenesis; Biosynthesis of amino acids; Carbon metabolism; Metabolic pathways; Salmonella infection
Sarcoplasmic calcium-binding protein OS=Fasciola gigantica OX=46835 GN=FGIG_07128 PE=4 SV=1	F.gigantica	tr|A0A504YGP8|A0A504YGP8_FASGI	19	19	50.52	384	44814.8	--	--	--	--	--
Paramyosin OS=Fasciola gigantica OX=46835 GN=FGIG_08997 PE=3 SV=1	F.gigantica	tr|A0A504Y9W6|A0A504Y9W6_FASGI	15	15	10.24	2002	230744	biological regulation;multicellular organismal process;developmental process;cellular process;response to stimulus;locomotion;reproductive process	protein-containing complex;cellular anatomical entity	cytoskeletal motor activity;binding	--	--
Spectrin beta chain OS=Fasciola gigantica OX=46835 GN=FGIG_08554 PE=3 SV=1	F.gigantica	tr|A0A504YIN4|A0A504YIN4_FASGI	15	15	7.92	2336	270020	biological regulation;signaling;cellular process	cellular anatomical entity	binding	--	--
Glutathione S-transferase sigma class OS=Fasciola gigantica OX=46835 PE=2 SV=1	F.gigantica	tr|K7Z2A9|K7Z2A9_FASGI	15	15	66.82	211	24595.3	--	--	catalytic activity	--	Arachidonic acid metabolism; Glutathione metabolism; Metabolic pathways; Metabolism of xenobiotics by cytochrome P450; Drug metabolism - cytochrome P450
Alanine transaminase OS=Fasciola gigantica OX=46835 GN=FGIG_03447 PE=3 SV=1	F.gigantica	tr|A0A504YJK4|A0A504YJK4_FASGI	15	15	40.4	500	55531.7	--	--	--	Amino acid transport and metabolism	Arginine biosynthesis; Carbon metabolism; Biosynthesis of amino acids; Metabolic pathways; Alanine, aspartate and glutamate metabolism; 2-Oxocarboxylic acid metabolism
Branched-chain-amino-acid aminotransferase OS=Fasciola gigantica OX=46835 GN=FGIG_02920 PE=3 SV=1	F.gigantica	tr|A0A504Z6I4|A0A504Z6I4_FASGI	17	17	56.07	387	43627	localization;cellular process;metabolic process;biological regulation	cellular anatomical entity	catalytic activity	Coenzyme transport and metabolism;Amino acid transport and metabolism	Biosynthesis of cofactors; Metabolic pathways; Cysteine and methionine metabolism; 2-Oxocarboxylic acid metabolism; Pantothenate and CoA biosynthesis; Biosynthesis of amino acids; Valine, leucine and isoleucine biosynthesis; Valine, leucine and isoleucine degradation
Uncharacterized protein OS=Fasciola gigantica OX=46835 GN=FGIG_02003 PE=4 SV=1	F.gigantica	tr|A0A504YJQ4|A0A504YJQ4_FASGI	13	13	10.84	1605	182663	--	--	--	--	--
Glutathione transferase OS=Fasciola gigantica OX=46835 GN=FGIG_08719 PE=3 SV=1	F.gigantica	tr|A0A504YW63|A0A504YW63_FASGI	16	15	36.42	313	35968.5	--	--	--	--	Platinum drug resistance; Fluid shear stress and atherosclerosis; Drug metabolism - cytochrome P450; Chemical carcinogenesis - reactive oxygen species; Metabolism of xenobiotics by cytochrome P450; Hepatocellular carcinoma; Drug metabolism - other enzymes; Metabolic pathways; Chemical carcinogenesis - DNA adducts; Pathways in cancer; Glutathione metabolism; Chemical carcinogenesis - receptor acti…
Uncharacterized protein OS=Fasciola gigantica OX=46835 GN=FGIG_08354 PE=4 SV=1	F.gigantica	tr|A0A504ZB58|A0A504ZB58_FASGI	16	16	67.98	228	26436.2	--	cellular anatomical entity	--	--	--
EGF-like domain-containing protein OS=Fasciola gigantica OX=46835 GN=FGIG_03998 PE=3 SV=1	F.gigantica	tr|A0A504YQK1|A0A504YQK1_FASGI	12	12	8.304	1987	221530	--	--	--	--	--
Translation elongation factor 2 OS=Fasciola gigantica OX=46835 GN=FGIG_00796 PE=3 SV=1	F.gigantica	tr|A0A504YZD9|A0A504YZD9_FASGI	12	12	18.82	850	94616.2	growth;reproductive process;multicellular organismal process;metabolic process;cellular process;developmental process	cellular anatomical entity	translation regulator activity;binding;catalytic activity	Translation, ribosomal structure and biogenesis	--
SERPIN domain-containing protein OS=Fasciola gigantica OX=46835 GN=FGIG_04537 PE=3 SV=1	F.gigantica	tr|A0A504Y562|A0A504Y562_FASGI	13	13	32.12	358	39709.2	--	--	--	Posttranslational modification, protein turnover, chaperones	--
Methylmalonyl-CoA mutase OS=Fasciola gigantica OX=46835 GN=FGIG_08857 PE=3 SV=1	F.gigantica	tr|A0A504YZU3|A0A504YZU3_FASGI	12	12	23.45	742	81940.9	multicellular organismal process;metabolic process;cellular process	cellular anatomical entity	catalytic activity;binding	--	Propanoate metabolism; Carbon metabolism; Metabolic pathways; Glyoxylate and dicarboxylate metabolism; Valine, leucine and isoleucine degradation
Triosephosphate isomerase OS=Fasciola gigantica OX=46835 GN=FGIG_01767 PE=3 SV=1	F.gigantica	tr|A0A504YTK2|A0A504YTK2_FASGI	12	12	64.03	253	27794.6	--	--	--	Carbohydrate transport and metabolism	Glycolysis / Gluconeogenesis; Inositol phosphate metabolism; Metabolic pathways; Carbon metabolism; Biosynthesis of amino acids; Fructose and mannose metabolism
Phosphoglycerate kinase OS=Fasciola gigantica OX=46835 GN=FGIG_04452 PE=3 SV=1	F.gigantica	tr|A0A504Z124|A0A504Z124_FASGI	11	11	31.81	415	44179.2	reproductive process;response to stimulus;locomotion;metabolic process;cellular process	cellular anatomical entity	binding;catalytic activity	Carbohydrate transport and metabolism	Carbon metabolism; Biosynthesis of amino acids; Metabolic pathways; Glycolysis / Gluconeogenesis
Retinaldehyde binding protein OS=Fasciola gigantica OX=46835 GN=FGIG_07780 PE=4 SV=1	F.gigantica	tr|A0A504YX94|A0A504YX94_FASGI	12	12	54.4	364	41760.4	--	--	--	--	--
Glutathione transferase OS=Fasciola gigantica OX=46835 GN=gst-1 PE=2 SV=1	F.gigantica	tr|Q9XYL9|Q9XYL9_FASGI	18	16	69.27	218	25337	metabolic process	cellular anatomical entity	catalytic activity	--	Drug metabolism - other enzymes; Chemical carcinogenesis - receptor activation; Glutathione metabolism; Chemical carcinogenesis - DNA adducts; Metabolic pathways; Pathways in cancer; Metabolism of xenobiotics by cytochrome P450; Chemical carcinogenesis - reactive oxygen species; Drug metabolism - cytochrome P450; Fluid shear stress and atherosclerosis; Platinum drug resistance; Hepatocellular car…
Fructose-bisphosphatase (Fragment) OS=Fasciola gigantica OX=46835 GN=FGIG_04759 PE=3 SV=1	F.gigantica	tr|A0A504YWE6|A0A504YWE6_FASGI	12	5	50.81	372	40482.8	metabolic process;cellular process	--	catalytic activity;binding	Carbohydrate transport and metabolism	Fructose and mannose metabolism; Pentose phosphate pathway; Glycolysis / Gluconeogenesis; Metabolic pathways; Carbon metabolism
Thioredoxin-glutathione reductase 2 OS=Fasciola gigantica OX=46835 PE=2 SV=1; Thioredoxin-glutathione reductase 1 OS=Fasciola gigantica OX=46835 PE=2 SV=1	F.gigantica	tr|A0A0K1NZF7|A0A0K1NZF7_FASGI;tr|A0A0K1NYF8|A0A0K1NYF8_FASGI	15	3	36.78	639	70977.9	--	--	--	Energy production and conversion	Selenocompound metabolism
Peptidyl-prolyl cis-trans isomerase OS=Fasciola gigantica OX=46835 GN=FGIG_11717 PE=3 SV=1	F.gigantica	tr|A0A504YFI1|A0A504YFI1_FASGI	13	13	78.53	163	17744.2	--	--	--	Posttranslational modification, protein turnover, chaperones	--
Kynurenine---oxoglutarate transaminase OS=Fasciola gigantica OX=46835 GN=FGIG_10384 PE=4 SV=1	F.gigantica	tr|A0A504YVF1|A0A504YVF1_FASGI	12	12	39.13	368	40858.9	--	--	--	Amino acid transport and metabolism	Metabolic pathways; Tryptophan metabolism; Selenocompound metabolism; Cysteine and methionine metabolism
Malate dehydrogenase OS=Fasciola gigantica OX=46835 GN=FGIG_05200 PE=3 SV=1	F.gigantica	tr|A0A504Z4D3|A0A504Z4D3_FASGI	11	11	41.05	363	39066.8	cellular process;metabolic process	cellular anatomical entity	catalytic activity;binding	Energy production and conversion	Metabolic pathways; Carbon metabolism; Glyoxylate and dicarboxylate metabolism; Citrate cycle (TCA cycle); Cysteine and methionine metabolism; Pyruvate metabolism
Glycogen debranching enzyme OS=Fasciola gigantica OX=46835 GN=FGIG_06646 PE=4 SV=1	F.gigantica	tr|A0A504YUV6|A0A504YUV6_FASGI	10	10	9.19	1654	186198	--	cellular anatomical entity	binding;catalytic activity	Carbohydrate transport and metabolism	Metabolic pathways; Starch and sucrose metabolism
Glutathione transferase OS=Fasciola gigantica OX=46835 GN=FGIG_05292 PE=3 SV=1	F.gigantica	tr|A0A504YYF4|A0A504YYF4_FASGI	11	11	35.56	419	47891.8	metabolic process;biological process involved in interspecies interaction between organisms;cellular process;response to stimulus	cellular anatomical entity	translation regulator activity;binding	Posttranslational modification, protein turnover, chaperones	--
Filamin-A OS=Fasciola gigantica OX=46835 GN=FGIG_01162 PE=3 SV=1	F.gigantica	tr|A0A504ZB76|A0A504ZB76_FASGI	10	10	5.703	2490	269334	--	--	--	--	--
Gill-specific calpain OS=Fasciola gigantica OX=46835 GN=FGIG_01291 PE=3 SV=1	F.gigantica	tr|A0A504YWV2|A0A504YWV2_FASGI	10	10	18.7	722	83500.7	--	--	catalytic activity;binding	Defense mechanisms	--
Heat shock protein 4L OS=Fasciola gigantica OX=46835 GN=FGIG_10505 PE=3 SV=1	F.gigantica	tr|A0A504YYB0|A0A504YYB0_FASGI	11	10	21.31	624	70221.6	--	cellular anatomical entity	binding	Posttranslational modification, protein turnover, chaperones	Protein processing in endoplasmic reticulum
Alpha-aminoadipic semialdehyde synthase mitochondrial OS=Fasciola gigantica OX=46835 GN=FGIG_10732 PE=4 SV=1	F.gigantica	tr|A0A504Z3L9|A0A504Z3L9_FASGI	10	10	52.03	246	27863.8	--	--	--	Amino acid transport and metabolism	Metabolic pathways; Lysine degradation
Leukotriene A-4 hydrolase OS=Fasciola gigantica OX=46835 GN=FGIG_00782 PE=3 SV=1	F.gigantica	tr|A0A504X7M0|A0A504X7M0_FASGI	11	11	26.47	680	77608.4	response to stimulus;metabolic process;developmental process;cellular process	cellular anatomical entity	binding;catalytic activity	Amino acid transport and metabolism	Metabolic pathways; Arachidonic acid metabolism
Cathepsin L1 OS=Fasciola gigantica OX=46835 GN=ctl1 PE=2 SV=1	F.gigantica	tr|H6WYY7|H6WYY7_FASGI	11	10	32.21	326	36785.1	metabolic process	cellular anatomical entity	catalytic activity	Function unknown	Autophagy - animal; Lysosome; Phagosome
Staphylococcal nuclease domain-containing protein OS=Fasciola gigantica OX=46835 GN=FGIG_08996 PE=4 SV=1	F.gigantica	tr|A0A504ZAB4|A0A504ZAB4_FASGI	8	8	10.77	1040	115401	--	--	--	--	--
Ezrin-moesin-radixin OS=Fasciola gigantica OX=46835 GN=FGIG_06080 PE=4 SV=1	F.gigantica	tr|A0A504ZA08|A0A504ZA08_FASGI	10	10	23.12	558	65737.2	response to stimulus;cellular process;developmental process;localization;biological regulation;multicellular organismal process	cellular anatomical entity;protein-containing complex	structural molecule activity;binding	--	--
Importin 7 OS=Fasciola gigantica OX=46835 GN=FGIG_06236 PE=4 SV=1	F.gigantica	tr|A0A504YMY3|A0A504YMY3_FASGI	11	11	18.5	1011	114388	multicellular organismal process;metabolic process;biological regulation;signaling;developmental process;cellular process;reproductive process	cellular anatomical entity;protein-containing complex	binding;catalytic activity	--	Nucleocytoplasmic transport
Dipeptidyl peptidase OS=Fasciola gigantica OX=46835 GN=FGIG_09152 PE=4 SV=1	F.gigantica	tr|A0A504Y6F5|A0A504Y6F5_FASGI	10	10	24.72	615	69059.9	metabolic process	cellular anatomical entity	binding;catalytic activity	--	--
Glutamine synthetase OS=Fasciola gigantica OX=46835 GN=FGIG_06082 PE=3 SV=1	F.gigantica	tr|A0A504YZA2|A0A504YZA2_FASGI	10	10	25.1	490	55153.2	--	--	--	Amino acid transport and metabolism	--
Malate dehydrogenase OS=Fasciola gigantica OX=46835 GN=FGIG_08365 PE=3 SV=1	F.gigantica	tr|A0A504YCA6|A0A504YCA6_FASGI	10	10	48.48	328	36037.6	response to stimulus;metabolic process;biological regulation;cellular process	cellular anatomical entity	catalytic activity	Energy production and conversion	Pyruvate metabolism; Glyoxylate and dicarboxylate metabolism; Cysteine and methionine metabolism; Citrate cycle (TCA cycle); Metabolic pathways; Carbon metabolism
Glycine hydroxymethyltransferase (Fragment) OS=Fasciola gigantica OX=46835 GN=FGIG_08269 PE=3 SV=1	F.gigantica	tr|A0A504YE73|A0A504YE73_FASGI	9	9	39.83	354	38628.7	response to stimulus;cellular process;metabolic process	cellular anatomical entity;protein-containing complex	catalytic activity;binding	Amino acid transport and metabolism	Metabolic pathways; Biosynthesis of cofactors; Glycine, serine and threonine metabolism; Carbon metabolism; Biosynthesis of amino acids; Glyoxylate and dicarboxylate metabolism; One carbon pool by folate
Aspartate aminotransferase OS=Fasciola gigantica OX=46835 GN=FGIG_04765 PE=3 SV=1	F.gigantica	tr|A0A504YL02|A0A504YL02_FASGI	9	9	27.34	406	45473.2	biological regulation;metabolic process;cellular process;response to stimulus	cellular anatomical entity	catalytic activity;binding	Amino acid transport and metabolism	Metabolic pathways; Arginine biosynthesis; Phenylalanine metabolism; 2-Oxocarboxylic acid metabolism; Alanine, aspartate and glutamate metabolism; Cysteine and methionine metabolism; Arginine and proline metabolism; Biosynthesis of amino acids; Carbon metabolism; Phenylalanine, tyrosine and tryptophan biosynthesis; Tyrosine metabolism
Tubulin beta chain OS=Fasciola gigantica OX=46835 GN=FGIG_02819 PE=3 SV=1	F.gigantica	tr|A0A504YSW8|A0A504YSW8_FASGI	11	11	33.48	442	49787.9	immune system process;cellular process;biological process involved in interspecies interaction between organisms;response to stimulus	protein-containing complex;cellular anatomical entity	catalytic activity;binding;structural molecule activity	--	Gap junction; Phagosome; Salmonella infection
Calponin OS=Fasciola gigantica OX=46835 GN=FGIG_01172 PE=3 SV=1	F.gigantica	tr|A0A504YK51|A0A504YK51_FASGI	12	12	32.96	361	39853	cellular process	--	binding	--	--
Phosphoglucomutase (alpha-D-glucose-1,6-bisphosphate-dependent) OS=Fasciola gigantica OX=46835 GN=FGIG_07540 PE=3 SV=1	F.gigantica	tr|A0A504Z4F7|A0A504Z4F7_FASGI	9	9	19.86	579	63666	metabolic process;cellular process	cellular anatomical entity	catalytic activity;binding	Carbohydrate transport and metabolism	Amino sugar and nucleotide sugar metabolism; Pentose phosphate pathway; Starch and sucrose metabolism; Purine metabolism; Biosynthesis of nucleotide sugars; Galactose metabolism; Glycolysis / Gluconeogenesis; Metabolic pathways
Spectrin alpha chain non-erythrocytic OS=Fasciola gigantica OX=46835 GN=FGIG_09949 PE=3 SV=1	F.gigantica	tr|A0A504Y9H5|A0A504Y9H5_FASGI	9	9	3.428	2421	281504	--	--	--	--	--
Peptidase D OS=Fasciola gigantica OX=46835 GN=FGIG_12081 PE=4 SV=1	F.gigantica	tr|A0A504XV93|A0A504XV93_FASGI	9	9	25.43	405	45328.6	--	--	--	Amino acid transport and metabolism	--
ATP binding cassette subfamily B MDR TAP OS=Fasciola gigantica OX=46835 GN=FGIG_05048 PE=4 SV=1	F.gigantica	tr|A0A504YNZ1|A0A504YNZ1_FASGI	8	8	8.413	1260	139481	reproductive process;immune system process;cellular process;regulation of biological process;response to stimulus;localization;developmental process;biological regulation	cellular anatomical entity	binding;ATP-dependent activity;transporter activity	--	ABC transporters
14-3-3 protein zeta/delta OS=Fasciola gigantica OX=46835 GN=FGIG_12079 PE=3 SV=1	F.gigantica	tr|A0A504YNS3|A0A504YNS3_FASGI	9	8	80	115	13194.5	--	--	binding;catalytic activity	--	--
UTP--glucose-1-phosphate uridylyltransferase OS=Fasciola gigantica OX=46835 GN=FGIG_09880 PE=3 SV=1	F.gigantica	tr|A0A504Z3Q6|A0A504Z3Q6_FASGI	8	8	24.58	358	40338.4	developmental process;cellular process;metabolic process;multicellular organismal process	cellular anatomical entity	binding;catalytic activity	Carbohydrate transport and metabolism;Coenzyme transport and metabolism	Starch and sucrose metabolism; Biosynthesis of cofactors; Metabolic pathways; Galactose metabolism; Biosynthesis of nucleotide sugars; Amino sugar and nucleotide sugar metabolism; Pentose and glucuronate interconversions
Aspartate aminotransferase OS=Fasciola gigantica OX=46835 GN=FGIG_08565 PE=3 SV=1	F.gigantica	tr|A0A504Y7H3|A0A504Y7H3_FASGI	9	9	28.89	398	44493.3	metabolic process;cellular process;localization	cellular anatomical entity	catalytic activity;binding	Amino acid transport and metabolism	Biosynthesis of amino acids; Carbon metabolism; Arginine and proline metabolism; Tyrosine metabolism; Phenylalanine, tyrosine and tryptophan biosynthesis; Phenylalanine metabolism; Arginine biosynthesis; Metabolic pathways; Cysteine and methionine metabolism; Alanine, aspartate and glutamate metabolism; 2-Oxocarboxylic acid metabolism
Myoferlin OS=Fasciola gigantica OX=46835 GN=FGIG_11155 PE=4 SV=1	F.gigantica	tr|A0A504ZB63|A0A504ZB63_FASGI	8	7	13.39	687	79044.2	--	cellular anatomical entity	--	--	--
Fructose-bisphosphate aldolase (Fragment) OS=Fasciola gigantica OX=46835 GN=FGIG_12193 PE=3 SV=1	F.gigantica	tr|A0A504ZAW9|A0A504ZAW9_FASGI	10	10	62.5	128	14183.3	cellular process;metabolic process	--	catalytic activity	Carbohydrate transport and metabolism	Glycolysis / Gluconeogenesis; Metabolic pathways; Carbon metabolism; Biosynthesis of amino acids; Fructose and mannose metabolism; Pentose phosphate pathway
Rab GDP dissociation inhibitor beta OS=Fasciola gigantica OX=46835 GN=FGIG_11560 PE=3 SV=1	F.gigantica	tr|A0A504YD60|A0A504YD60_FASGI	8	7	31.7	306	35233.5	--	--	--	--	--
Adenylyl cyclase-associated protein OS=Fasciola gigantica OX=46835 GN=FGIG_10041 PE=3 SV=1	F.gigantica	tr|A0A504YCH2|A0A504YCH2_FASGI	8	8	28.6	479	52878.9	--	--	--	--	--
Tyrosine 3-monooxygenase/tryptophan 5-monooxygenase activation protein theta polypeptide OS=Fasciola gigantica OX=46835 GN=FGIG_07351 PE=3 SV=1	F.gigantica	tr|A0A504YX93|A0A504YX93_FASGI	20	10	70.24	252	28661.1	biological adhesion;reproductive process;cellular process;response to stimulus;multicellular organismal process;biological regulation;localization;behavior;developmental process	cellular anatomical entity;protein-containing complex	binding	--	Longevity regulating pathway - worm; Cell cycle; Oocyte meiosis
Acetyl-CoA deacylase OS=Fasciola gigantica OX=46835 GN=FGIG_02713 PE=3 SV=1	F.gigantica	tr|A0A504YC54|A0A504YC54_FASGI	8	8	25.52	478	52470.7	cellular process;metabolic process	cellular anatomical entity	catalytic activity	Energy production and conversion	--
Tyrosine 3-monooxygenase/tryptophan 5-monooxygenase activation protein theta polypeptide OS=Fasciola gigantica OX=46835 GN=FGIG_05814 PE=3 SV=1	F.gigantica	tr|A0A504YKJ3|A0A504YKJ3_FASGI	12	10	44.86	243	27494.8	cellular process;metabolic process;biological regulation	--	catalytic activity;binding	--	Hippo signaling pathway - fly
Fructose-bisphosphate aldolase OS=Fasciola gigantica OX=46835 GN=FGIG_12192 PE=3 SV=1	F.gigantica	tr|A0A504Z4Y4|A0A504Z4Y4_FASGI	8	8	40.3	201	21259.3	metabolic process;cellular process	--	catalytic activity	Carbohydrate transport and metabolism	Biosynthesis of amino acids; Carbon metabolism; Metabolic pathways; Glycolysis / Gluconeogenesis; Pentose phosphate pathway; Fructose and mannose metabolism
Myoglobin OS=Fasciola gigantica OX=46835 GN=FGIG_07874 PE=4 SV=1	F.gigantica	tr|A0A504YI87|A0A504YI87_FASGI	7	5	52	125	14368.6	--	--	--	--	--
Filamin-A OS=Fasciola gigantica OX=46835 GN=FGIG_10911 PE=3 SV=1	F.gigantica	tr|A0A504YKH3|A0A504YKH3_FASGI	8	8	7.86	1374	150062	--	--	--	--	--
Dynein light chain OS=Fasciola gigantica OX=46835 GN=FGIG_10861 PE=3 SV=1	F.gigantica	tr|A0A504YNX9|A0A504YNX9_FASGI	10	8	85.39	89	10286.5	cellular process;immune system process;reproductive process;localization;developmental process;viral process;metabolic process;biological regulation	cellular anatomical entity;protein-containing complex	molecular function regulator;cytoskeletal motor activity;binding	--	--
Putative Ankyrin repeat-containing OS=Fasciola gigantica OX=46835 GN=FGIG_02952 PE=4 SV=1	F.gigantica	tr|A0A504YRM7|A0A504YRM7_FASGI	8	8	16.15	712	77094.6	--	--	--	--	TGF-beta signaling pathway; Hippo signaling pathway - fly; mRNA surveillance pathway
Carbonyl reductase (NADPH) OS=Fasciola gigantica OX=46835 GN=FGIG_01635 PE=4 SV=1	F.gigantica	tr|A0A504YXL4|A0A504YXL4_FASGI	7	7	35.34	283	31372.6	--	--	--	General function prediction only;Lipid transport and metabolism	Metabolic pathways; Folate biosynthesis; Arachidonic acid metabolism; Metabolism of xenobiotics by cytochrome P450
Nardilysin OS=Fasciola gigantica OX=46835 GN=FGIG_05052 PE=4 SV=1	F.gigantica	tr|A0A504YB95|A0A504YB95_FASGI	7	7	7.357	1033	117177	metabolic process	--	catalytic activity	Posttranslational modification, protein turnover, chaperones	--
Annexin OS=Fasciola gigantica OX=46835 GN=FGIG_12159 PE=3 SV=1	F.gigantica	tr|A0A504Y587|A0A504Y587_FASGI	7	7	34.98	263	29408.4	--	cellular anatomical entity	binding	--	--
Transgelin OS=Fasciola gigantica OX=46835 GN=FGIG_02273 PE=3 SV=1	F.gigantica	tr|A0A504YCY9|A0A504YCY9_FASGI	7	7	36.41	217	24210.6	--	--	binding	--	--
Myoglobin 1 OS=Fasciola gigantica OX=46835 GN=FGIG_04909 PE=3 SV=1	F.gigantica	tr|A0A504YY71|A0A504YY71_FASGI	7	7	50.34	149	16656.1	--	--	binding	--	--
Tetratricopeptide repeat protein 39B OS=Fasciola gigantica OX=46835 GN=FGIG_08861 PE=4 SV=1	F.gigantica	tr|A0A504Z3T9|A0A504Z3T9_FASGI	7	7	13.59	677	77736	--	--	--	--	--
Inorganic diphosphatase OS=Fasciola gigantica OX=46835 GN=FGIG_04581 PE=3 SV=1	F.gigantica	tr|A0A504YH45|A0A504YH45_FASGI	8	8	31.27	291	32666.9	metabolic process;cellular process	cellular anatomical entity	catalytic activity	Energy production and conversion	--
Ferritin OS=Fasciola gigantica OX=46835 GN=FGIG_03789 PE=3 SV=1	F.gigantica	tr|A0A504YX11|A0A504YX11_FASGI	6	6	35.4	226	26082.8	--	--	--	--	Necroptosis; Mineral absorption; Ferroptosis
Phosphoglucomutase OS=Fasciola gigantica OX=46835 GN=FGIG_00594 PE=3 SV=1	F.gigantica	tr|A0A504Z3Z6|A0A504Z3Z6_FASGI	6	6	16.33	600	68129.9	--	--	--	Carbohydrate transport and metabolism	Starch and sucrose metabolism; Pentose phosphate pathway; Amino sugar and nucleotide sugar metabolism; Metabolic pathways; Galactose metabolism; Glycolysis / Gluconeogenesis; Purine metabolism; Biosynthesis of nucleotide sugars
Ferritin OS=Fasciola gigantica OX=46835 GN=FGIG_03790 PE=3 SV=1	F.gigantica	tr|A0A504YQY7|A0A504YQY7_FASGI	6	6	26.19	210	24370.1	--	--	--	--	--
Heat shock 70 kDa protein 4 OS=Fasciola gigantica OX=46835 GN=FGIG_04814 PE=3 SV=1	F.gigantica	tr|A0A504YBY0|A0A504YBY0_FASGI	8	7	11.83	778	87732.1	--	--	--	Posttranslational modification, protein turnover, chaperones	--
Ferritin OS=Fasciola gigantica OX=46835 GN=FGIG_03791 PE=3 SV=1	F.gigantica	tr|A0A504YTH3|A0A504YTH3_FASGI	5	5	33.94	218	25133.6	--	--	binding	--	Necroptosis; Mineral absorption; Ferroptosis
Uncharacterized protein (Fragment) OS=Fasciola gigantica OX=46835 GN=FGIG_02021 PE=4 SV=1	F.gigantica	tr|A0A504Z3S9|A0A504Z3S9_FASGI	7	7	12.81	726	78466.1	--	--	--	--	--
Putative Cofilin actophorin OS=Fasciola gigantica OX=46835 GN=FGIG_02872 PE=3 SV=1	F.gigantica	tr|A0A504Z805|A0A504Z805_FASGI	6	6	57.04	135	15646.9	cellular process	cellular anatomical entity	binding	--	--
Rab GDP dissociation inhibitor OS=Fasciola gigantica OX=46835 GN=FGIG_12043 PE=3 SV=1	F.gigantica	tr|A0A504YZV0|A0A504YZV0_FASGI	7	6	25.25	408	46701.5	biological regulation;localization	protein-containing complex;cellular anatomical entity	molecular function regulator	--	--
Importin subunit beta OS=Fasciola gigantica OX=46835 GN=FGIG_03686 PE=4 SV=1	F.gigantica	tr|A0A504Z8R2|A0A504Z8R2_FASGI	6	6	10.15	926	100897	localization;cellular process;viral process;biological process involved in interspecies interaction between organisms;multi-organism process;metabolic process;biological regulation	protein-containing complex;cellular anatomical entity	binding	--	Nucleocytoplasmic transport
Karyopherin (Importin) beta 3 OS=Fasciola gigantica OX=46835 GN=FGIG_01937 PE=4 SV=1	F.gigantica	tr|A0A504YZP6|A0A504YZP6_FASGI	5	5	5.393	1131	125543	localization;cellular process	--	binding	--	Nucleocytoplasmic transport
EF-hand domain-containing protein OS=Fasciola gigantica OX=46835 GN=FGIG_10866 PE=4 SV=1	F.gigantica	tr|A0A504YSF4|A0A504YSF4_FASGI	6	6	80.85	94	10928.2	--	--	binding;catalytic activity	--	--
Heat shock protein kDa OS=Fasciola gigantica OX=46835 GN=FGIG_09654 PE=3 SV=1	F.gigantica	tr|A0A504Z3L5|A0A504Z3L5_FASGI	6	6	12.3	618	69845.6	--	--	--	Posttranslational modification, protein turnover, chaperones	Protein processing in endoplasmic reticulum; Spliceosome; Longevity regulating pathway - multiple species; Endocytosis
GST C-terminal domain-containing protein OS=Fasciola gigantica OX=46835 GN=FGIG_08402 PE=4 SV=1	F.gigantica	tr|A0A504YWR3|A0A504YWR3_FASGI	7	7	55.49	164	18667.1	--	--	--	--	--
Dysferlin (Fragment) OS=Fasciola gigantica OX=46835 GN=FGIG_10412 PE=4 SV=1	F.gigantica	tr|A0A504Z0Y5|A0A504Z0Y5_FASGI	5	5	11.15	655	72987.9	biological regulation;multicellular organismal process;cellular process;response to stimulus	cellular anatomical entity	binding	--	--
Mastin OS=Fasciola gigantica OX=46835 GN=FGIG_00425 PE=4 SV=1	F.gigantica	tr|A0A504YAC3|A0A504YAC3_FASGI	6	6	21.6	500	56087.5	--	--	--	Posttranslational modification, protein turnover, chaperones;Cell wall/membrane/envelope biogenesis	--
Threonine ammonia-lyase OS=Fasciola gigantica OX=46835 GN=FGIG_07415 PE=4 SV=1	F.gigantica	tr|A0A504YJT7|A0A504YJT7_FASGI	6	6	21.32	455	48780.3	metabolic process;cellular process	cellular anatomical entity	binding;catalytic activity	Amino acid transport and metabolism;General function prediction only	Valine, leucine and isoleucine biosynthesis; Biosynthesis of amino acids; Glycine, serine and threonine metabolism; Carbon metabolism; Metabolic pathways
Adenosylhomocysteinase OS=Fasciola gigantica OX=46835 GN=FGIG_02481 PE=3 SV=1	F.gigantica	tr|A0A504YY90|A0A504YY90_FASGI	5	5	18.06	432	48021.7	cellular process;metabolic process	cellular anatomical entity	catalytic activity;binding	Coenzyme transport and metabolism	Cysteine and methionine metabolism; Metabolic pathways
Putative vacuolar protein sorting 26 vps26 OS=Fasciola gigantica OX=46835 GN=FGIG_01566 PE=4 SV=1	F.gigantica	tr|A0A504YQE4|A0A504YQE4_FASGI	6	6	13.07	551	60734	--	--	--	Function unknown	--
Uncharacterized protein OS=Fasciola gigantica OX=46835 GN=FGIG_04800 PE=4 SV=1	F.gigantica	tr|A0A504YVL5|A0A504YVL5_FASGI	5	5	26.94	219	24733.7	--	--	--	--	--
Calpain OS=Fasciola gigantica OX=46835 GN=FGIG_10864 PE=3 SV=1	F.gigantica	tr|A0A504YK94|A0A504YK94_FASGI	5	5	25.45	165	18525.2	--	--	--	--	--
Aminomethyltransferase OS=Fasciola gigantica OX=46835 GN=FGIG_10625 PE=3 SV=1	F.gigantica	tr|A0A504YTK5|A0A504YTK5_FASGI	6	6	24.06	424	46816.3	cellular process;metabolic process	cellular anatomical entity	catalytic activity	Amino acid transport and metabolism	One carbon pool by folate; Glyoxylate and dicarboxylate metabolism; Metabolic pathways; Carbon metabolism; Glycine, serine and threonine metabolism
Myophilin OS=Fasciola gigantica OX=46835 GN=FGIG_12455 PE=4 SV=1	F.gigantica	tr|A0A504YDV3|A0A504YDV3_FASGI	5	5	43.48	161	17935.7	--	--	--	--	--
ADP-ribosylation factor OS=Fasciola gigantica OX=46835 GN=FGIG_08587 PE=3 SV=1	F.gigantica	tr|A0A504Y7N1|A0A504Y7N1_FASGI	5	3	43.09	181	20603.6	locomotion;metabolic process;biological regulation;multicellular organismal process;developmental process;behavior;localization;cellular process	cellular anatomical entity	catalytic activity;binding	General function prediction only;Intracellular trafficking, secretion, and vesicular transport	Endocytosis
Uncharacterized protein OS=Fasciola gigantica OX=46835 GN=FGIG_05766 PE=4 SV=1	F.gigantica	tr|A0A504YNV9|A0A504YNV9_FASGI	6	6	15.61	487	53801.1	--	--	--	--	--
BAR domain-containing protein OS=Fasciola gigantica OX=46835 GN=FGIG_03778 PE=4 SV=1	F.gigantica	tr|A0A504YSN0|A0A504YSN0_FASGI	5	5	29.25	212	24428.7	--	--	--	--	Endocytosis; Autophagy - animal
Uncharacterized protein OS=Fasciola gigantica OX=46835 GN=FGIG_12601 PE=4 SV=1	F.gigantica	tr|A0A504YPA7|A0A504YPA7_FASGI	6	6	14.61	616	71024.9	--	--	--	--	--
Glucose-6-phosphate 1-dehydrogenase OS=Fasciola gigantica OX=46835 GN=FGIG_08112 PE=4 SV=1	F.gigantica	tr|A0A504Y6U9|A0A504Y6U9_FASGI	6	6	18.15	314	36262.4	--	--	--	Carbohydrate transport and metabolism	Glutathione metabolism; Metabolic pathways; Carbon metabolism; Pentose phosphate pathway
Transitional endoplasmic reticulum ATPase TER94 OS=Fasciola gigantica OX=46835 GN=FGIG_11990 PE=3 SV=1	F.gigantica	tr|A0A504YJX6|A0A504YJX6_FASGI	5	5	14.97	481	53162.1	--	--	--	Cell cycle control, cell division, chromosome partitioning;Signal transduction mechanisms;Cell wall/membrane/envelope biogenesis	Protein processing in endoplasmic reticulum
Paramyosin OS=Fasciola gigantica OX=46835 GN=FGIG_02459 PE=3 SV=1	F.gigantica	tr|A0A504Z290|A0A504Z290_FASGI	5	5	6.012	865	99483.4	--	cellular anatomical entity	cytoskeletal motor activity	--	--
Glycogenin glucosyltransferase OS=Fasciola gigantica OX=46835 GN=FGIG_00957 PE=4 SV=1	F.gigantica	tr|A0A504Y9R7|A0A504Y9R7_FASGI	5	5	29.94	324	37270.1	cellular process;metabolic process	cellular anatomical entity	catalytic activity;binding	--	Starch and sucrose metabolism; Metabolic pathways
Transaldolase OS=Fasciola gigantica OX=46835 GN=FGIG_05452 PE=3 SV=1	F.gigantica	tr|A0A504YML1|A0A504YML1_FASGI	5	5	24.2	281	31342.7	cellular process;metabolic process	cellular anatomical entity	binding;catalytic activity	Carbohydrate transport and metabolism	Pentose phosphate pathway; Biosynthesis of amino acids; Carbon metabolism; Metabolic pathways
Bravo_FIGEY domain-containing protein OS=Fasciola gigantica OX=46835 GN=FGIG_03250 PE=4 SV=1	F.gigantica	tr|A0A504Y7M0|A0A504Y7M0_FASGI	6	5	11.31	875	96905.4	--	--	--	--	--
Retinaldehyde dehydrogenase type 2 OS=Fasciola gigantica OX=46835 GN=FGIG_01497 PE=3 SV=1	F.gigantica	tr|A0A504YF29|A0A504YF29_FASGI	3	3	10.1	495	53275.9	--	--	catalytic activity	Lipid transport and metabolism	--
Rab-protein 8 OS=Fasciola gigantica OX=46835 GN=FGIG_06830 PE=4 SV=1	F.gigantica	tr|A0A504YU78|A0A504YU78_FASGI	4	3	15.81	215	24143.4	biological regulation;immune system process;cellular process;localization	cellular anatomical entity	catalytic activity;binding	--	--
RNA helicase OS=Fasciola gigantica OX=46835 GN=FGIG_02516 PE=3 SV=1	F.gigantica	tr|A0A504YKU1|A0A504YKU1_FASGI	5	5	17.69	390	44118.1	cellular process;growth;reproductive process;localization;developmental process;multicellular organismal process;metabolic process;biological regulation;response to stimulus;locomotion	cellular anatomical entity;protein-containing complex	catalytic activity;ATP-dependent activity;translation regulator activity;binding	Replication, recombination and repair	--
cAMP-dependent protein kinase catalytic subunit alpha OS=Fasciola gigantica OX=46835 GN=FGIG_06125 PE=3 SV=1	F.gigantica	tr|A0A504YN48|A0A504YN48_FASGI	4	4	19	321	37344	reproductive process;immune system process;cellular process;response to stimulus;multicellular organismal process;metabolic process;biological regulation;developmental process	cellular anatomical entity;protein-containing complex	catalytic activity;binding	Posttranslational modification, protein turnover, chaperones;Signal transduction mechanisms;Cell wall/membrane/envelope biogenesis	Autophagy - animal; Wnt signaling pathway
Clathrin heavy chain OS=Fasciola gigantica OX=46835 GN=FGIG_02390 PE=3 SV=1	F.gigantica	tr|A0A504YEU6|A0A504YEU6_FASGI	6	6	4.461	1726	196045	biological regulation;metabolic process;localization;immune system process;developmental process;cellular process	cellular anatomical entity;protein-containing complex	structural molecule activity;binding	--	Endocytosis; Lysosome
Ubiquitin protein ligase BRE1 OS=Fasciola gigantica OX=46835 GN=FGIG_01778 PE=4 SV=1	F.gigantica	tr|A0A504YUN9|A0A504YUN9_FASGI	4	4	6.319	902	100587	cellular process	cellular anatomical entity	--	Cell cycle control, cell division, chromosome partitioning	--
Glutathione transferase OS=Fasciola gigantica OX=46835 PE=2 SV=1	F.gigantica	tr|K7YEX8|K7YEX8_FASGI	6	6	29.58	240	27473.5	metabolic process;cellular process	--	catalytic activity	Posttranslational modification, protein turnover, chaperones	--
T-complex protein 1 subunit gamma OS=Fasciola gigantica OX=46835 GN=FGIG_02826 PE=3 SV=1	F.gigantica	tr|A0A504YS00|A0A504YS00_FASGI	4	4	8.425	546	59636.7	--	--	--	Posttranslational modification, protein turnover, chaperones	--
Serine/threonine-protein phosphatase OS=Fasciola gigantica OX=46835 GN=FGIG_01822 PE=3 SV=1	F.gigantica	tr|A0A504YI98|A0A504YI98_FASGI	4	4	16.67	318	36368.8	--	--	--	--	TGF-beta signaling pathway; Autophagy - other; mRNA surveillance pathway; Autophagy - animal
Protein disulfide-isomerase OS=Fasciola gigantica OX=46835 GN=FGIG_07376 PE=3 SV=1	F.gigantica	tr|A0A504YYD5|A0A504YYD5_FASGI	4	4	6.612	484	54811.9	cellular process	--	--	Posttranslational modification, protein turnover, chaperones	Protein processing in endoplasmic reticulum
Ornithine aminotransferase mitochondrial OS=Fasciola gigantica OX=46835 GN=FGIG_06613 PE=3 SV=1	F.gigantica	tr|A0A504Z3T4|A0A504Z3T4_FASGI	5	5	17.48	326	37115.2	cellular process;metabolic process	cellular anatomical entity	binding;catalytic activity	Amino acid transport and metabolism	Arginine and proline metabolism; Metabolic pathways
Actin alpha skeletal muscle protein OS=Fasciola gigantica OX=46835 GN=FGIG_12390 PE=4 SV=1	F.gigantica	tr|A0A504YPI2|A0A504YPI2_FASGI	12	7	89.25	93	10447.2	cellular process;developmental process;immune system process;rhythmic process;biological regulation;response to stimulus;biological adhesion	protein-containing complex;cellular anatomical entity	binding;structural molecule activity	Cytoskeleton	--
Alpha actinin sarcomeric OS=Fasciola gigantica OX=46835 GN=FGIG_00789 PE=3 SV=1	F.gigantica	tr|A0A504YAD4|A0A504YAD4_FASGI	7	5	10.44	900	104738	cellular process;behavior;metabolic process;multicellular organismal process	cellular anatomical entity	catalytic activity;binding	--	--
ADP/ATP translocase OS=Fasciola gigantica OX=46835 GN=FGIG_09083 PE=3 SV=1	F.gigantica	tr|A0A504YFL1|A0A504YFL1_FASGI	4	4	14.47	311	34093.5	metabolic process;cellular process;localization	cellular anatomical entity	structural molecule activity;transporter activity	--	Necroptosis; Calcium signaling pathway; Cellular senescence
Putative phosphatase 1 regulatory subunit OS=Fasciola gigantica OX=46835 GN=FGIG_04523 PE=4 SV=1	F.gigantica	tr|A0A504YEE5|A0A504YEE5_FASGI	4	4	37.02	181	21063.1	--	--	--	--	--
Dynein light chain OS=Fasciola gigantica OX=46835 GN=FGIG_07349 PE=3 SV=1	F.gigantica	tr|A0A504YPY2|A0A504YPY2_FASGI	6	4	55.06	89	10428.8	localization;developmental process;multicellular organismal process;biological regulation;metabolic process;immune system process;cellular process;reproductive process	cellular anatomical entity;protein-containing complex	catalytic activity;cytoskeletal motor activity;binding	--	Salmonella infection
Leucine aminopeptidase OS=Fasciola gigantica OX=46835 GN=FGIG_00410 PE=3 SV=1	F.gigantica	tr|A0A504YWR8|A0A504YWR8_FASGI	4	4	18.07	238	26002.3	metabolic process	cellular anatomical entity	binding;catalytic activity	Amino acid transport and metabolism	Metabolic pathways; Glutathione metabolism
Tubulin alpha chain OS=Fasciola gigantica OX=46835 GN=FGIG_12230 PE=3 SV=1	F.gigantica	tr|A0A504YVW1|A0A504YVW1_FASGI	5	4	20.41	387	43192	cellular process	cellular anatomical entity	structural molecule activity;catalytic activity;binding	--	Apoptosis; Salmonella infection; Phagosome; Tight junction; Gap junction
Arf-GAP with dual PH domain-containing protein 1 OS=Fasciola gigantica OX=46835 GN=FGIG_03771 PE=4 SV=1	F.gigantica	tr|A0A504Y890|A0A504Y890_FASGI	5	5	16	400	45557.4	--	--	--	--	--
Uncharacterized protein OS=Fasciola gigantica OX=46835 GN=FGIG_01166 PE=4 SV=1	F.gigantica	tr|A0A504YXP1|A0A504YXP1_FASGI	4	4	3.482	1551	174872	--	--	--	--	--
Alanine transaminase OS=Fasciola gigantica OX=46835 GN=FGIG_05611 PE=3 SV=1	F.gigantica	tr|A0A504Y8X6|A0A504Y8X6_FASGI	4	4	15.94	414	46163.4	cellular process;metabolic process	cellular anatomical entity	catalytic activity	Amino acid transport and metabolism	Alanine, aspartate and glutamate metabolism; 2-Oxocarboxylic acid metabolism; Metabolic pathways; Arginine biosynthesis; Biosynthesis of amino acids; Carbon metabolism
Exportin-2 OS=Fasciola gigantica OX=46835 GN=FGIG_08874 PE=3 SV=1	F.gigantica	tr|A0A504YZP5|A0A504YZP5_FASGI	5	5	7.756	967	107933	cellular process;localization;biological regulation	cellular anatomical entity	binding	--	Nucleocytoplasmic transport
SOCS box domain-containing protein OS=Fasciola gigantica OX=46835 GN=FGIG_06104 PE=4 SV=1	F.gigantica	tr|A0A504Z5S3|A0A504Z5S3_FASGI	6	6	20	385	44379.7	--	--	--	--	--
AQP-2 OS=Fasciola gigantica OX=46835 GN=AQP-2 PE=2 SV=1	F.gigantica	tr|E3UZI5|E3UZI5_FASGI	4	4	10.17	295	32426.5	localization	cellular anatomical entity	transporter activity	Carbohydrate transport and metabolism	--
Heat shock protein cognate 5 OS=Fasciola gigantica OX=46835 GN=FGIG_06752 PE=3 SV=1	F.gigantica	tr|A0A504YC27|A0A504YC27_FASGI	3	3	7.84	574	61672.9	--	--	--	Posttranslational modification, protein turnover, chaperones	RNA degradation
Formin binding protein (Fragment) OS=Fasciola gigantica OX=46835 GN=FGIG_10144 PE=4 SV=1	F.gigantica	tr|A0A504YZ29|A0A504YZ29_FASGI	4	4	7.719	570	63426.6	--	--	--	--	--
Thioredoxin dependent peroxide reductase OS=Fasciola gigantica OX=46835 GN=FGIG_05317 PE=3 SV=1	F.gigantica	tr|A0A504YI61|A0A504YI61_FASGI	4	4	25.45	220	24464	cellular process;detoxification	--	antioxidant activity;catalytic activity	Defense mechanisms	--
GTP-binding nuclear protein OS=Fasciola gigantica OX=46835 GN=FGIG_05103 PE=3 SV=1	F.gigantica	tr|A0A504YQR1|A0A504YQR1_FASGI	4	4	22.69	216	24717.2	biological regulation;localization;cellular process;developmental process	cellular anatomical entity;protein-containing complex	catalytic activity;binding	Transcription;General function prediction only	Ribosome biogenesis in eukaryotes; Nucleocytoplasmic transport
CUB domain-containing protein OS=Fasciola gigantica OX=46835 GN=FGIG_03242 PE=4 SV=1	F.gigantica	tr|A0A504YTP0|A0A504YTP0_FASGI	4	4	27.12	177	19320	--	--	--	--	--
Mitogen-activated protein kinase OS=Fasciola gigantica OX=46835 GN=FGIG_02161 PE=3 SV=1	F.gigantica	tr|A0A504Y668|A0A504Y668_FASGI	4	3	12.54	351	40105	response to stimulus;multicellular organismal process;biological regulation;metabolic process;localization;developmental process;viral process;behavior;cellular process;immune system process	protein-containing complex;cellular anatomical entity	catalytic activity;binding	Cell wall/membrane/envelope biogenesis;Transcription;Defense mechanisms;Intracellular trafficking, secretion, and vesicular transport;Posttranslational modification, protein turnover, chaperones	TGF-beta signaling pathway; Apoptosis - fly; FoxO signaling pathway; MAPK signaling pathway - fly; Autophagy - animal; mTOR signaling pathway; Dorso-ventral axis formation
Calcium binding protein 39 OS=Fasciola gigantica OX=46835 GN=FGIG_09076 PE=3 SV=1	F.gigantica	tr|A0A504YXL7|A0A504YXL7_FASGI	4	4	15.52	406	46613	biological regulation	cellular anatomical entity	binding	--	mTOR signaling pathway
Regulator of microtubule dynamics protein 1 OS=Fasciola gigantica OX=46835 GN=FGIG_11865 PE=4 SV=1	F.gigantica	tr|A0A504YZZ9|A0A504YZZ9_FASGI	4	4	32.14	196	22689.8	--	cellular anatomical entity	--	--	--
Phosphoglycerate mutase OS=Fasciola gigantica OX=46835 GN=FGIG_08259 PE=3 SV=1	F.gigantica	tr|A0A504YRA6|A0A504YRA6_FASGI	5	5	33.47	251	28213.3	biological regulation;metabolic process;cellular process	cellular anatomical entity	catalytic activity	Carbohydrate transport and metabolism	Biosynthesis of amino acids; Glycine, serine and threonine metabolism; Carbon metabolism; Metabolic pathways; Glycolysis / Gluconeogenesis
Uncharacterized protein OS=Fasciola gigantica OX=46835 GN=FGIG_12185 PE=4 SV=1	F.gigantica	tr|A0A504YDR8|A0A504YDR8_FASGI	4	4	33.05	118	12778.1	--	--	--	--	--
Polyubiquitine protein OS=Fasciola gigantica OX=46835 GN=FGIG_12152 PE=4 SV=1	F.gigantica	tr|A0A504YBE5|A0A504YBE5_FASGI	4	1	55.88	136	15253.3	response to stimulus;multicellular organismal process;metabolic process;biological regulation;localization;developmental process;viral process;reproductive process;multi-organism process;cellular process;immune system process	cellular anatomical entity	binding;structural molecule activity	Posttranslational modification, protein turnover, chaperones	Kaposi sarcoma-associated herpesvirus infection; Pathways of neurodegeneration - multiple diseases; Mitophagy - animal; Ubiquitin mediated proteolysis; Parkinson disease
T-complex protein 1 subunit eta OS=Fasciola gigantica OX=46835 GN=FGIG_07642 PE=3 SV=1	F.gigantica	tr|A0A504ZBK0|A0A504ZBK0_FASGI	3	3	7.89	545	59677.3	--	--	--	Posttranslational modification, protein turnover, chaperones	--
Uncharacterized protein OS=Fasciola gigantica OX=46835 GN=FGIG_02706 PE=4 SV=1	F.gigantica	tr|A0A504YFQ1|A0A504YFQ1_FASGI	4	4	6.343	1340	145309	--	--	--	--	--
Coatomer subunit alpha OS=Fasciola gigantica OX=46835 GN=FGIG_01593 PE=4 SV=1	F.gigantica	tr|A0A504YBD2|A0A504YBD2_FASGI	4	4	5.581	1111	123735	localization;cellular process;multicellular organismal process;biological regulation	protein-containing complex;cellular anatomical entity	binding	--	--
Programmed cell death 6-interacting protein OS=Fasciola gigantica OX=46835 GN=FGIG_11342 PE=4 SV=1	F.gigantica	tr|A0A504YU64|A0A504YU64_FASGI	4	4	18.22	214	23686.8	--	--	--	--	Endocytosis
ATP-binding cassette sub-family D member 4 OS=Fasciola gigantica OX=46835 GN=FGIG_07870 PE=4 SV=1	F.gigantica	tr|A0A504YAS3|A0A504YAS3_FASGI	5	5	9.01	677	76066.7	--	cellular anatomical entity	--	General function prediction only	Peroxisome; ABC transporters
Alpha-aminoadipic semialdehyde synthase mitochondrial OS=Fasciola gigantica OX=46835 GN=FGIG_09527 PE=4 SV=1	F.gigantica	tr|A0A504YZ46|A0A504YZ46_FASGI	4	4	43.16	95	10546.2	cellular process;biological regulation;metabolic process	--	catalytic activity	Amino acid transport and metabolism	Lysine degradation; Metabolic pathways
Guanylate kinase OS=Fasciola gigantica OX=46835 GN=FGIG_03556 PE=3 SV=1	F.gigantica	tr|A0A504YCZ1|A0A504YCZ1_FASGI	4	4	8.138	639	72179.4	--	cellular anatomical entity	catalytic activity	General function prediction only;Nucleotide transport and metabolism	--
Tryptophanyl-tRNA synthetase OS=Fasciola gigantica OX=46835 GN=FGIG_10324 PE=3 SV=1	F.gigantica	tr|A0A504YKT7|A0A504YKT7_FASGI	5	5	15.55	418	47851.8	--	--	--	Translation, ribosomal structure and biogenesis	Aminoacyl-tRNA biosynthesis
Succinate dehydrogenase [ubiquinone] flavoprotein subunit, mitochondrial OS=Fasciola gigantica OX=46835 GN=FGIG_08388 PE=3 SV=1	F.gigantica	tr|A0A504Y4X4|A0A504Y4X4_FASGI	3	3	5.53	651	71477.4	metabolic process;localization;cellular process;developmental process	protein-containing complex;cellular anatomical entity	binding;catalytic activity	Energy production and conversion	Metabolic pathways; Carbon metabolism; Oxidative phosphorylation; Citrate cycle (TCA cycle)
Stress-induced-phosphoprotein 1 OS=Fasciola gigantica OX=46835 GN=FGIG_09548 PE=4 SV=1	F.gigantica	tr|A0A504YKD1|A0A504YKD1_FASGI	4	4	17.24	319	36299	response to stimulus	cellular anatomical entity	binding	--	--
Annexin OS=Fasciola gigantica OX=46835 GN=FGIG_06592 PE=3 SV=1	F.gigantica	tr|A0A504Z5J0|A0A504Z5J0_FASGI	5	5	21.63	208	23517.6	--	--	--	--	--
Defective in cullin neddylation protein OS=Fasciola gigantica OX=46835 GN=FGIG_05889 PE=4 SV=1	F.gigantica	tr|A0A504YRA2|A0A504YRA2_FASGI	5	5	25.78	256	30409.5	metabolic process;cellular process	protein-containing complex	binding	--	--
Glutathione peroxidase OS=Fasciola gigantica OX=46835 GN=FGIG_06396 PE=3 SV=1	F.gigantica	tr|A0A504Y9C3|A0A504Y9C3_FASGI	3	3	52.17	69	7977.2	cellular process;response to stimulus;detoxification	--	catalytic activity;antioxidant activity	Lipid transport and metabolism;Defense mechanisms	Metabolic pathways; Glutathione metabolism
Uncharacterized protein OS=Fasciola gigantica OX=46835 GN=FGIG_03895 PE=4 SV=1	F.gigantica	tr|A0A504YEP0|A0A504YEP0_FASGI	3	3	12.04	432	47253.2	--	--	--	--	--
Vitellogenin domain-containing protein OS=Fasciola gigantica OX=46835 GN=FGIG_02001 PE=4 SV=1	F.gigantica	tr|A0A504YJU5|A0A504YJU5_FASGI	4	4	5.083	1141	128598	localization	--	--	--	--
SERPIN domain-containing protein OS=Fasciola gigantica OX=46835 GN=FGIG_08940 PE=3 SV=1	F.gigantica	tr|A0A504X338|A0A504X338_FASGI	4	4	23.83	235	26024.9	--	--	molecular function regulator	Posttranslational modification, protein turnover, chaperones	--
Uncharacterized protein OS=Fasciola gigantica OX=46835 GN=FGIG_07142 PE=3 SV=1	F.gigantica	tr|A0A504Z1G4|A0A504Z1G4_FASGI	3	3	28.46	130	13939.6	--	--	--	--	--
Lysosomal Pro-X carboxypeptidase OS=Fasciola gigantica OX=46835 GN=FGIG_09439 PE=3 SV=1	F.gigantica	tr|A0A504YTN5|A0A504YTN5_FASGI	3	3	10.18	334	37720	--	--	--	--	--
Glucose transporter OS=Fasciola gigantica OX=46835 PE=2 SV=1	F.gigantica	tr|I6Z120|I6Z120_FASGI	4	4	9.109	505	54328.4	localization;cellular process;response to stimulus	cellular anatomical entity	binding;transporter activity	Inorganic ion transport and metabolism;General function prediction only;Amino acid transport and metabolism	--
Peptidylprolyl isomerase OS=Fasciola gigantica OX=46835 GN=FGIG_11294 PE=4 SV=1	F.gigantica	tr|A0A504YWR6|A0A504YWR6_FASGI	5	5	18.06	432	48599.7	reproductive process;cellular process;developmental process;localization;biological regulation	cellular anatomical entity	binding	--	--
Ubiquitin carboxyl-terminal hydrolase OS=Fasciola gigantica OX=46835 GN=FGIG_07368 PE=3 SV=1	F.gigantica	tr|A0A504YVF7|A0A504YVF7_FASGI	5	5	23.39	218	24623.9	cellular process;response to stimulus;biological regulation;metabolic process;multicellular organismal process;developmental process;behavior;localization	cellular anatomical entity	catalytic activity;binding	--	--
Calpain-2 catalytic subunit OS=Fasciola gigantica OX=46835 GN=FGIG_01894 PE=3 SV=1	F.gigantica	tr|A0A504YRD0|A0A504YRD0_FASGI	3	3	4.901	755	85934	developmental process;cellular process;multicellular organismal process;metabolic process;reproductive process;locomotion	cellular anatomical entity	binding;catalytic activity	--	--
Putative actin-depolymerizing factor OS=Fasciola gigantica OX=46835 GN=FGIG_03015 PE=3 SV=1	F.gigantica	tr|A0A504Y8J6|A0A504Y8J6_FASGI	3	3	34.81	135	15610.6	biological regulation;cellular process;developmental process	cellular anatomical entity	binding	--	--
Calreticulin OS=Fasciola gigantica OX=46835 GN=FGIG_09000 PE=3 SV=1	F.gigantica	tr|A0A504ZBD5|A0A504ZBD5_FASGI	3	3	12.59	421	48832.9	cellular process	cellular anatomical entity	binding	--	Protein processing in endoplasmic reticulum; Phagosome
Kunitz protein 8 OS=Fasciola gigantica OX=46835 GN=FGIG_05379 PE=4 SV=1	F.gigantica	tr|A0A504Z2I4|A0A504Z2I4_FASGI	3	3	51.19	84	9126.4	developmental process;biological regulation;multicellular organismal process	cellular anatomical entity	binding;molecular function regulator	--	--
V-type proton ATPase subunit a OS=Fasciola gigantica OX=46835 GN=FGIG_00170 PE=3 SV=1	F.gigantica	tr|A0A504YEN2|A0A504YEN2_FASGI	3	3	4.654	881	99401.2	--	--	--	Energy production and conversion	Phagosome; Lysosome; Oxidative phosphorylation; Metabolic pathways
Histone H4 OS=Fasciola gigantica OX=46835 GN=FGIG_09044 PE=3 SV=1	F.gigantica	tr|A0A504Z5J4|A0A504Z5J4_FASGI	3	3	27.18	103	11367.3	metabolic process;biological regulation;multicellular organismal process;cellular process;response to stimulus	protein-containing complex;cellular anatomical entity	binding	--	--
Calponin-homology (CH) domain-containing protein OS=Fasciola gigantica OX=46835 GN=FGIG_00874 PE=4 SV=1	F.gigantica	tr|A0A504Z9F5|A0A504Z9F5_FASGI	3	3	27.15	151	16978.6	--	--	--	--	--
Globin-3 OS=Fasciola gigantica OX=46835 GN=FGIG_04911 PE=3 SV=1	F.gigantica	tr|A0A504YZF9|A0A504YZF9_FASGI	6	4	62.42	149	17091.5	--	--	binding	--	--
Uncharacterized protein OS=Fasciola gigantica OX=46835 GN=FGIG_03274 PE=4 SV=1	F.gigantica	tr|A0A504YDF3|A0A504YDF3_FASGI	4	4	28.15	135	14843.9	--	--	--	--	--
Queuosine salvage protein OS=Fasciola gigantica OX=46835 GN=FGIG_02089 PE=3 SV=1	F.gigantica	tr|A0A504YER7|A0A504YER7_FASGI	4	4	6.497	785	88407.3	--	--	--	--	--
EGF-like domain-containing protein OS=Fasciola gigantica OX=46835 GN=FGIG_00114 PE=4 SV=1	F.gigantica	tr|A0A504YKJ0|A0A504YKJ0_FASGI	4	4	4.192	1837	209742	--	--	--	--	--
Calponin OS=Fasciola gigantica OX=46835 GN=FGIG_00165 PE=3 SV=1	F.gigantica	tr|A0A504Y7U6|A0A504Y7U6_FASGI	4	4	21.61	361	38478.5	--	--	--	--	--
CCT-theta OS=Fasciola gigantica OX=46835 GN=FGIG_09793 PE=3 SV=1	F.gigantica	tr|A0A504YNF9|A0A504YNF9_FASGI	3	3	3.777	1112	122495	cellular process;behavior;biological regulation;multicellular organismal process	cellular anatomical entity;protein-containing complex	binding;catalytic activity	Posttranslational modification, protein turnover, chaperones	--
GST 26 OS=Fasciola gigantica OX=46835 GN=FGIG_10896 PE=4 SV=1	F.gigantica	tr|A0A504Z3G8|A0A504Z3G8_FASGI	4	4	41.43	70	8394.5	--	cellular anatomical entity	catalytic activity	--	Drug metabolism - other enzymes; Metabolism of xenobiotics by cytochrome P450; Drug metabolism - cytochrome P450; Glutathione metabolism; Metabolic pathways
Fructose-bisphosphate aldolase OS=Fasciola gigantica OX=46835 GN=FGIG_07052 PE=3 SV=1	F.gigantica	tr|A0A504YE45|A0A504YE45_FASGI	7	7	14.29	441	48393.1	cellular process;metabolic process	--	catalytic activity	Carbohydrate transport and metabolism	Glycolysis / Gluconeogenesis; Biosynthesis of amino acids; Carbon metabolism; Metabolic pathways; Fructose and mannose metabolism; Pentose phosphate pathway
Mediator of cell motility 1 OS=Fasciola gigantica OX=46835 GN=FGIG_08835 PE=3 SV=1	F.gigantica	tr|A0A504YL84|A0A504YL84_FASGI	4	4	19.59	296	33357.3	biological regulation	cellular anatomical entity	binding	--	--
Pyruvate dehydrogenase E1 component subunit alpha OS=Fasciola gigantica OX=46835 GN=FGIG_02061 PE=4 SV=1	F.gigantica	tr|A0A504YAI3|A0A504YAI3_FASGI	4	4	15.64	390	43334.9	multicellular organismal process;metabolic process;localization;developmental process;cellular process;reproductive process	cellular anatomical entity	catalytic activity	Energy production and conversion	Citrate cycle (TCA cycle); Pyruvate metabolism; Metabolic pathways; Carbon metabolism; Glycolysis / Gluconeogenesis
IST1 homolog OS=Fasciola gigantica OX=46835 GN=FGIG_02272 PE=3 SV=1	F.gigantica	tr|A0A504Y734|A0A504Y734_FASGI	3	3	8.219	365	39383.8	metabolic process;biological regulation;viral process;developmental process;localization;response to stimulus;biological process involved in interspecies interaction between organisms;cellular process;biological adhesion;growth	cellular anatomical entity	binding	--	Endocytosis
ATP:UMP phosphotransferase OS=Fasciola gigantica OX=46835 GN=FGIG_02158 PE=3 SV=1	F.gigantica	tr|A0A504Y7J3|A0A504Y7J3_FASGI	4	4	24.38	160	18743.4	--	--	--	Nucleotide transport and metabolism	Metabolic pathways; Biosynthesis of cofactors; Purine metabolism; Thiamine metabolism
Translation elongation factor 1-alpha OS=Fasciola gigantica OX=46835 GN=FGIG_10368 PE=4 SV=1	F.gigantica	tr|A0A504XH41|A0A504XH41_FASGI	3	3	13.01	246	27649.7	metabolic process;cellular process	cellular anatomical entity	translation regulator activity;binding;catalytic activity	Translation, ribosomal structure and biogenesis	Nucleocytoplasmic transport
Lanthionine synthetase c like protein 1 OS=Fasciola gigantica OX=46835 GN=FGIG_06244 PE=3 SV=1	F.gigantica	tr|A0A504Y8Y1|A0A504Y8Y1_FASGI	2	2	8.411	428	47583.9	--	--	--	--	--
Actin-interacting protein 1 (Fragment) OS=Fasciola gigantica OX=46835 GN=FGIG_08755 PE=4 SV=1	F.gigantica	tr|A0A504Z4Z2|A0A504Z4Z2_FASGI	4	4	24.61	191	20781.5	--	--	--	--	--
Cullin-associated NEDD8-dissociated protein 1 OS=Fasciola gigantica OX=46835 GN=FGIG_11904 PE=4 SV=1	F.gigantica	tr|A0A504YIT7|A0A504YIT7_FASGI	3	3	8.758	491	54567.9	cellular process;developmental process;metabolic process;biological regulation	cellular anatomical entity;protein-containing complex	binding	--	--
Uncharacterized protein OS=Fasciola gigantica OX=46835 GN=FGIG_09570 PE=4 SV=1	F.gigantica	tr|A0A504YEF3|A0A504YEF3_FASGI	3	3	15.38	221	25942.6	--	--	--	--	--
Glycine cleavage system P protein OS=Fasciola gigantica OX=46835 GN=FGIG_04986 PE=3 SV=1	F.gigantica	tr|A0A504YUZ3|A0A504YUZ3_FASGI	4	4	5.799	914	101088	metabolic process;cellular process	protein-containing complex;cellular anatomical entity	binding;catalytic activity	--	Glyoxylate and dicarboxylate metabolism; Metabolic pathways; Glycine, serine and threonine metabolism; Carbon metabolism
Hsc70-interacting protein isoform X2 OS=Fasciola gigantica OX=46835 GN=FGIG_10602 PE=3 SV=1	F.gigantica	tr|A0A504Z116|A0A504Z116_FASGI	3	3	10.61	396	44511.8	cellular process	cellular anatomical entity	molecular adaptor activity	Posttranslational modification, protein turnover, chaperones;Cell wall/membrane/envelope biogenesis	--
Putative aminopeptidase W07G4.4 OS=Fasciola gigantica OX=46835 GN=FGIG_00411 PE=4 SV=1	F.gigantica	tr|A0A504YZM7|A0A504YZM7_FASGI	3	3	29.85	134	15181.5	--	--	--	--	Metabolic pathways; Glutathione metabolism
Farnesyl-pyrophosphate synthetase OS=Fasciola gigantica OX=46835 GN=FGIG_04602 PE=3 SV=1	F.gigantica	tr|A0A504Z1M2|A0A504Z1M2_FASGI	3	3	11.59	302	34353.9	response to stimulus;reproductive process;cellular process;developmental process;biological regulation;metabolic process	cellular anatomical entity	catalytic activity	Coenzyme transport and metabolism	Human T-cell leukemia virus 1 infection; Terpenoid backbone biosynthesis; Influenza A; Metabolic pathways
NAD-dependent succinate-semialdehyde dehydrogenase OS=Fasciola gigantica OX=46835 GN=FGIG_09129 PE=3 SV=1	F.gigantica	tr|A0A504YWE3|A0A504YWE3_FASGI	3	3	11.14	332	35221	multicellular organismal process;metabolic process;biological regulation;developmental process;cellular process	cellular anatomical entity	binding;catalytic activity	Lipid transport and metabolism	Alanine, aspartate and glutamate metabolism; Metabolic pathways; Butanoate metabolism
ADF-H domain-containing protein OS=Fasciola gigantica OX=46835 GN=FGIG_01188 PE=3 SV=1	F.gigantica	tr|A0A504Z9P6|A0A504Z9P6_FASGI	3	3	24.65	142	15906.9	cellular process;developmental process;reproductive process	cellular anatomical entity	binding	--	--
Tubulin alpha chain OS=Fasciola gigantica OX=46835 GN=FGIG_10904 PE=3 SV=1	F.gigantica	tr|A0A504YSA5|A0A504YSA5_FASGI	6	5	19.46	514	57205.4	localization;cellular process	cellular anatomical entity	structural molecule activity;binding;catalytic activity	--	Phagosome
Tetraspanin OS=Fasciola gigantica OX=46835 GN=FGIG_03543 PE=3 SV=1	F.gigantica	tr|A0A504Z060|A0A504Z060_FASGI	4	4	23.39	218	23970.1	--	--	--	--	Lysosome
Purine nucleoside phosphorylase OS=Fasciola gigantica OX=46835 GN=FGIG_09928 PE=3 SV=1	F.gigantica	tr|A0A504YB65|A0A504YB65_FASGI	2	2	8.741	286	31047.2	--	--	--	Nucleotide transport and metabolism	Metabolic pathways; Purine metabolism; Pyrimidine metabolism; Nicotinate and nicotinamide metabolism
Sodium-coupled neutral amino acid transporter 9 OS=Fasciola gigantica OX=46835 GN=FGIG_01336 PE=4 SV=1	F.gigantica	tr|A0A504YQR0|A0A504YQR0_FASGI	3	3	8.255	642	70524.8	--	--	--	--	mTOR signaling pathway
Neurogenic locus notch protein OS=Fasciola gigantica OX=46835 GN=FGIG_09480 PE=4 SV=1	F.gigantica	tr|A0A504YDC1|A0A504YDC1_FASGI	3	3	3.955	885	96931.1	--	--	--	--	--
Glucose-6-phosphate isomerase OS=Fasciola gigantica OX=46835 GN=FGIG_06020 PE=3 SV=1	F.gigantica	tr|A0A504YE35|A0A504YE35_FASGI	3	3	11.99	292	32854.6	multicellular organismal process;biological regulation;metabolic process;developmental process;immune system process;cellular process	cellular anatomical entity	catalytic activity;binding	Carbohydrate transport and metabolism	Glycolysis / Gluconeogenesis; Starch and sucrose metabolism; Metabolic pathways; Carbon metabolism; Amino sugar and nucleotide sugar metabolism; Pentose phosphate pathway; Biosynthesis of nucleotide sugars
Collagen type IV alpha 2 chain OS=Fasciola gigantica OX=46835 GN=FGIG_01356 PE=4 SV=1	F.gigantica	tr|A0A504Z0M2|A0A504Z0M2_FASGI	3	3	2.267	1632	163134	developmental process;cellular process	cellular anatomical entity;protein-containing complex	structural molecule activity;binding	--	--
Acid sphingomyelinase phosphodiesterase 3a OS=Fasciola gigantica OX=46835 GN=FGIG_09336 PE=4 SV=1	F.gigantica	tr|A0A504YQ34|A0A504YQ34_FASGI	3	3	11.48	479	54414.4	--	--	--	--	--
MF6 OS=Fasciola gigantica OX=46835 GN=FGIG_04341 PE=2 SV=1	F.gigantica	tr|A0A286RXS6|A0A286RXS6_FASGI	3	3	26.67	90	10242.9	--	--	--	--	--
Exportin-1 OS=Fasciola gigantica OX=46835 GN=FGIG_12357 PE=3 SV=1	F.gigantica	tr|A0A504YDK9|A0A504YDK9_FASGI	2	2	4.803	458	52954	response to stimulus;multi-organism process;biological regulation;localization;cellular process;viral process	cellular anatomical entity;protein-containing complex	binding;molecular carrier activity	--	Ribosome biogenesis in eukaryotes; Nucleocytoplasmic transport
Eupitrilysin (M16 family) OS=Fasciola gigantica OX=46835 GN=FGIG_05963 PE=4 SV=1	F.gigantica	tr|A0A504Z8W2|A0A504Z8W2_FASGI	3	3	6.99	515	57659.2	metabolic process	--	catalytic activity	Posttranslational modification, protein turnover, chaperones	--
CCT-alpha OS=Fasciola gigantica OX=46835 GN=FGIG_10994 PE=3 SV=1	F.gigantica	tr|A0A504YGF9|A0A504YGF9_FASGI	2	2	3.617	553	60294.1	cellular process;biological process involved in interspecies interaction between organisms;reproductive process;developmental process;localization;metabolic process;biological regulation;multicellular organismal process	cellular anatomical entity;protein-containing complex	catalytic activity;binding	Posttranslational modification, protein turnover, chaperones	--
Tegumental calcium-binding EF-hand protein 4 OS=Fasciola gigantica OX=46835 GN=CaBP4 PE=2 SV=1	F.gigantica	tr|H2DH28|H2DH28_FASGI	3	3	16.23	191	22250.3	cellular process	--	--	--	--
Anoctamin OS=Fasciola gigantica OX=46835 GN=FGIG_09056 PE=3 SV=1	F.gigantica	tr|A0A504YWW1|A0A504YWW1_FASGI	2	2	3.832	835	95803.1	response to stimulus;cellular process;localization;biological regulation	cellular anatomical entity	transporter activity	--	--
Putative pyrophosphate-dependent phosphofructo-1-kinase OS=Fasciola gigantica OX=46835 GN=FGIG_04849 PE=4 SV=1	F.gigantica	tr|A0A504YDK3|A0A504YDK3_FASGI	2	2	7.143	420	46427.1	--	--	--	Carbohydrate transport and metabolism	Carbon metabolism; Biosynthesis of amino acids; Pentose phosphate pathway; RNA degradation; Metabolic pathways; Glycolysis / Gluconeogenesis; Galactose metabolism; Fructose and mannose metabolism
RNA 3'-terminal phosphate cyclase OS=Fasciola gigantica OX=46835 GN=FGIG_03848 PE=3 SV=1	F.gigantica	tr|A0A504YWS3|A0A504YWS3_FASGI	2	2	9.091	363	38966.8	--	cellular anatomical entity	binding;catalytic activity	RNA processing and modification	--
Ubiquitin-conjugating enzyme OS=Fasciola gigantica OX=46835 GN=FGIG_03290 PE=3 SV=1	F.gigantica	tr|A0A504Y2Y1|A0A504Y2Y1_FASGI	3	3	21.77	147	16642	locomotion;reproductive process;cellular process;developmental process;biological regulation;metabolic process;multicellular organismal process	protein-containing complex	binding;catalytic activity	Posttranslational modification, protein turnover, chaperones	Protein processing in endoplasmic reticulum; MAPK signaling pathway - fly; Ubiquitin mediated proteolysis; Toll and Imd signaling pathway
Coproporphyrinogen oxidase OS=Fasciola gigantica OX=46835 GN=FGIG_09992 PE=3 SV=1	F.gigantica	tr|A0A504YY15|A0A504YY15_FASGI	3	3	8.495	412	47799.3	cellular process;metabolic process	cellular anatomical entity	binding;catalytic activity	Coenzyme transport and metabolism	Metabolic pathways; Porphyrin and chlorophyll metabolism; Biosynthesis of cofactors
Major vault protein OS=Fasciola gigantica OX=46835 GN=FGIG_01701 PE=4 SV=1	F.gigantica	tr|A0A504Y9P3|A0A504Y9P3_FASGI	2	2	3.82	890	99761.6	response to stimulus;biological regulation;cellular process;developmental process;localization	cellular anatomical entity;protein-containing complex	binding	--	--
Putative Ribonucleotide-diphosphate reductase small subunit OS=Fasciola gigantica OX=46835 GN=FGIG_04903 PE=3 SV=1	F.gigantica	tr|A0A504YXP2|A0A504YXP2_FASGI	2	2	11.28	257	29872.9	metabolic process;biological regulation;cellular process	cellular anatomical entity;protein-containing complex	binding;catalytic activity	Nucleotide transport and metabolism	Metabolic pathways; p53 signaling pathway; Glutathione metabolism; Purine metabolism; Pyrimidine metabolism; Drug metabolism - other enzymes
Putative laminin OS=Fasciola gigantica OX=46835 GN=FGIG_08749 PE=4 SV=1	F.gigantica	tr|A0A504YJT9|A0A504YJT9_FASGI	2	2	1.433	1814	201200	--	--	--	--	ECM-receptor interaction
Uncharacterized protein OS=Fasciola gigantica OX=46835 GN=FGIG_10587 PE=4 SV=1	F.gigantica	tr|A0A504YPR0|A0A504YPR0_FASGI	2	2	24.07	108	12530.6	--	--	--	--	--
Uncharacterized protein (Fragment) OS=Fasciola gigantica OX=46835 GN=FGIG_10213 PE=4 SV=1	F.gigantica	tr|A0A504Y7X1|A0A504Y7X1_FASGI	2	2	24.69	162	18391	--	--	--	--	--
Fumarate hydratase class I anaerobic OS=Fasciola gigantica OX=46835 GN=FGIG_00729 PE=3 SV=1	F.gigantica	tr|A0A504YJH6|A0A504YJH6_FASGI	2	2	10.2	255	27877.7	cellular process;metabolic process	--	catalytic activity	--	Pyruvate metabolism; Citrate cycle (TCA cycle); Metabolic pathways; Carbon metabolism
Microtubule-associated protein RP/EB family member OS=Fasciola gigantica OX=46835 GN=FGIG_04512 PE=4 SV=1	F.gigantica	tr|A0A504YW74|A0A504YW74_FASGI	3	3	15.32	248	27945.7	cellular process;localization;biological regulation	cellular anatomical entity	binding	--	--
ARF small monomeric GTPase OS=Fasciola gigantica OX=46835 GN=FGIG_08984 PE=3 SV=1	F.gigantica	tr|A0A504YVL4|A0A504YVL4_FASGI	4	2	36.46	181	20489.4	--	--	--	General function prediction only;Intracellular trafficking, secretion, and vesicular transport	Endocytosis
Tetraspanin (Fragment) OS=Fasciola gigantica OX=46835 GN=FGIG_12136 PE=4 SV=1	F.gigantica	tr|A0A504YAG5|A0A504YAG5_FASGI	2	2	9.036	166	17786.8	cellular process;developmental process;biological regulation	cellular anatomical entity;protein-containing complex	binding	--	Lysosome; Proteoglycans in cancer
V-type proton ATPase subunit H OS=Fasciola gigantica OX=46835 GN=FGIG_02726 PE=3 SV=1	F.gigantica	tr|A0A504YTB2|A0A504YTB2_FASGI	2	2	6.338	426	49639.5	--	--	--	--	mTOR signaling pathway; Oxidative phosphorylation; Metabolic pathways; Lysosome; Phagosome
Hypoxanthine-guanine phosphoribosyltransferase OS=Fasciola gigantica OX=46835 GN=FGIG_11634 PE=4 SV=1	F.gigantica	tr|A0A504YWI7|A0A504YWI7_FASGI	2	2	6.849	365	41850	response to stimulus;cellular process;developmental process;metabolic process	cellular anatomical entity	binding;catalytic activity	Nucleotide transport and metabolism	Purine metabolism; Drug metabolism - other enzymes; Metabolic pathways
Putative actin-interacting protein 1 OS=Fasciola gigantica OX=46835 GN=FGIG_08754 PE=4 SV=1	F.gigantica	tr|A0A504Z501|A0A504Z501_FASGI	2	2	9.697	330	35952.4	cellular process;developmental process;localization;regulation of biological process	--	--	--	--
Succinate dehydrogenase cytochrome b560 subunit, mitochondrial OS=Fasciola gigantica OX=46835 GN=FGIG_04170 PE=3 SV=1	F.gigantica	tr|A0A504YDU0|A0A504YDU0_FASGI	2	2	12.81	203	22654.5	cellular process;metabolic process	cellular anatomical entity;protein-containing complex	catalytic activity	Energy production and conversion	Citrate cycle (TCA cycle); Carbon metabolism; Metabolic pathways; Oxidative phosphorylation
Ubiquitin carboxyl-terminal hydrolase 7 OS=Fasciola gigantica OX=46835 GN=FGIG_04836 PE=3 SV=1	F.gigantica	tr|A0A504YL48|A0A504YL48_FASGI	3	3	2.598	1424	159260	--	--	--	--	FoxO signaling pathway
Legumain-1 OS=Fasciola gigantica OX=46835 PE=2 SV=1; Legumain like OS=Fasciola gigantica OX=46835 GN=FGIG_02693 PE=3 SV=1	F.gigantica	tr|A6Y9U8|A6Y9U8_FASGI;tr|A0A504YCT9|A0A504YCT9_FASGI	3	3	8.941	425	48027.1	--	--	--	Posttranslational modification, protein turnover, chaperones;Amino acid transport and metabolism	Lysosome
Serine hydroxymethyltransferase OS=Fasciola gigantica OX=46835 GN=FGIG_10407 PE=3 SV=1	F.gigantica	tr|A0A504Y698|A0A504Y698_FASGI	2	2	9.316	526	56888.5	metabolic process;cellular process	cellular anatomical entity	binding;catalytic activity	Amino acid transport and metabolism	Biosynthesis of amino acids; Glycine, serine and threonine metabolism; Carbon metabolism; Metabolic pathways; Biosynthesis of cofactors; Glyoxylate and dicarboxylate metabolism; One carbon pool by folate
Malate dehydrogenase OS=Fasciola gigantica OX=46835 GN=FGIG_12658 PE=4 SV=1	F.gigantica	tr|A0A504Z4Z6|A0A504Z4Z6_FASGI	2	2	18.49	119	13203	--	--	--	Energy production and conversion	--
Asparaginase OS=Fasciola gigantica OX=46835 GN=FGIG_01323 PE=4 SV=1	F.gigantica	tr|A0A504YPB6|A0A504YPB6_FASGI	2	2	4.817	519	56763.2	cellular process;metabolic process	--	catalytic activity	Translation, ribosomal structure and biogenesis;Amino acid transport and metabolism	--
Heat shock protein mitochondrial OS=Fasciola gigantica OX=46835 GN=FGIG_07547 PE=3 SV=1	F.gigantica	tr|A0A504YM04|A0A504YM04_FASGI	2	2	4.704	574	61094.9	response to stimulus;immune system process;cellular process;biological regulation;metabolic process;multicellular organismal process	protein-containing complex;cellular anatomical entity	binding	Posttranslational modification, protein turnover, chaperones	RNA degradation
Succinate dehydrogenase [ubiquinone] iron-sulfur subunit, mitochondrial (Fragment) OS=Fasciola gigantica OX=46835 GN=FGIG_09770 PE=3 SV=1	F.gigantica	tr|A0A504YRX6|A0A504YRX6_FASGI	3	3	15.42	240	27838.2	--	--	--	Energy production and conversion	Citrate cycle (TCA cycle); Oxidative phosphorylation; Carbon metabolism; Metabolic pathways
Platelet-activating factor acetylhydrolase IB subunit gamma OS=Fasciola gigantica OX=46835 GN=FGIG_07313 PE=4 SV=1	F.gigantica	tr|A0A504YQJ3|A0A504YQJ3_FASGI	2	2	13.1	229	25969.4	--	--	--	Lipid transport and metabolism;Cell cycle control, cell division, chromosome partitioning;Carbohydrate transport and metabolism	Ether lipid metabolism; Metabolic pathways
Serine/threonine-protein phosphatase OS=Fasciola gigantica OX=46835 GN=FGIG_04172 PE=3 SV=1	F.gigantica	tr|A0A504YQM3|A0A504YQM3_FASGI	3	3	5.189	636	70007.4	reproductive process;growth;cellular process;immune system process;response to stimulus;locomotion;developmental process;behavior;localization;biological process involved in intraspecies interaction between organisms;biological regulation;metabolic process;multicellular organismal process	cellular anatomical entity;protein-containing complex	binding;catalytic activity;molecular function regulator	Signal transduction mechanisms	Wnt signaling pathway
Cathepsin L (Fragment) OS=Fasciola gigantica OX=46835 GN=cat-L1F PE=2 SV=1	F.gigantica	tr|Q9NGW0|Q9NGW0_FASGI	4	3	20.55	219	24415.3	metabolic process	--	catalytic activity	Function unknown;Inorganic ion transport and metabolism	Autophagy - animal; Apoptosis; Lysosome; Phagosome
S-(hydroxymethyl)glutathione dehydrogenase OS=Fasciola gigantica OX=46835 GN=FGIG_00370 PE=3 SV=1	F.gigantica	tr|A0A504ZAD8|A0A504ZAD8_FASGI	2	2	6.897	377	40446.2	biological regulation;response to stimulus	cellular anatomical entity	binding;catalytic activity	Energy production and conversion	Fatty acid degradation; Glycolysis / Gluconeogenesis; Metabolic pathways; Pyruvate metabolism; Carbon metabolism; Metabolism of xenobiotics by cytochrome P450; Retinol metabolism; Tyrosine metabolism; Drug metabolism - cytochrome P450
Dynein light chain OS=Fasciola gigantica OX=46835 GN=FGIG_05227 PE=3 SV=1	F.gigantica	tr|A0A504X0J9|A0A504X0J9_FASGI	2	2	10.53	95	11470	reproductive process;multicellular organismal process;biological regulation;metabolic process;localization;developmental process;cellular process	cellular anatomical entity;protein-containing complex	binding;catalytic activity	--	Salmonella infection
Uncharacterized protein OS=Fasciola gigantica OX=46835 GN=FGIG_06102 PE=4 SV=1	F.gigantica	tr|A0A504Z459|A0A504Z459_FASGI	2	2	25.16	159	18520.5	--	--	--	--	--
Ras protein Rab 2 OS=Fasciola gigantica OX=46835 GN=FGIG_05549 PE=4 SV=1	F.gigantica	tr|A0A504Z9W1|A0A504Z9W1_FASGI	2	2	11.32	212	23486.3	biological regulation;cellular process;localization	cellular anatomical entity	catalytic activity;binding	General function prediction only	--
Putative annexin (Fragment) OS=Fasciola gigantica OX=46835 GN=FGIG_11369 PE=3 SV=1	F.gigantica	tr|A0A504YXG1|A0A504YXG1_FASGI	3	3	10.42	192	22108.6	--	--	--	--	--
Phospholipase B-like OS=Fasciola gigantica OX=46835 GN=FGIG_03241 PE=3 SV=1	F.gigantica	tr|A0A504YRJ4|A0A504YRJ4_FASGI	3	3	7.692	416	47893.3	--	cellular anatomical entity	--	--	--
Multidrug resistance protein 1 (Fragment) OS=Fasciola gigantica OX=46835 GN=FGIG_05063 PE=4 SV=1	F.gigantica	tr|A0A504YSZ7|A0A504YSZ7_FASGI	2	2	2.202	1181	129723	response to stimulus;localization;developmental process;multicellular organismal process;biological regulation;reproductive process;cellular process;immune system process;rhythmic process	cellular anatomical entity	ATP-dependent activity;binding;transporter activity	--	ABC transporters
Laminin gamma 1 OS=Fasciola gigantica OX=46835 GN=FGIG_02235 PE=4 SV=1	F.gigantica	tr|A0A504YHP8|A0A504YHP8_FASGI	2	2	3.835	704	78609.5	--	--	--	--	--
Uncharacterized protein OS=Fasciola gigantica OX=46835 GN=FGIG_02370 PE=4 SV=1	F.gigantica	tr|A0A504Y4W0|A0A504Y4W0_FASGI	2	2	5.097	412	45222.1	--	--	--	--	--
Putative rna polymerase ii transcription elongation factor elongin/siii subunit elongin b OS=Fasciola gigantica OX=46835 GN=FGIG_06007 PE=4 SV=1	F.gigantica	tr|A0A504YIH8|A0A504YIH8_FASGI	2	2	25.6	125	14040.2	response to stimulus;multicellular organismal process;biological regulation;metabolic process;cellular process;developmental process	cellular anatomical entity;protein-containing complex	transcription regulator activity;catalytic activity;binding	--	Ubiquitin mediated proteolysis
Armadillo type fold (Fragment) OS=Fasciola gigantica OX=46835 GN=FGIG_02734 PE=4 SV=1	F.gigantica	tr|A0A504YG60|A0A504YG60_FASGI	3	3	6.167	681	76184.1	--	--	--	--	--
CUB domain-containing protein OS=Fasciola gigantica OX=46835 GN=FGIG_03244 PE=4 SV=1	F.gigantica	tr|A0A504Z0I2|A0A504Z0I2_FASGI	2	2	6.109	311	34475.9	--	--	--	--	--
Carbonic anhydrase OS=Fasciola gigantica OX=46835 GN=FGIG_01041 PE=3 SV=1	F.gigantica	tr|A0A504YYJ9|A0A504YYJ9_FASGI	2	2	9.917	242	27210.3	metabolic process;cellular process	--	--	Inorganic ion transport and metabolism	Metabolic pathways; Nitrogen metabolism
Paramyosin OS=Fasciola gigantica OX=46835 GN=FGIG_08945 PE=3 SV=1	F.gigantica	tr|A0A504Z112|A0A504Z112_FASGI	2	2	1.387	1946	223176	--	cellular anatomical entity	binding	--	--
SCP domain-containing protein OS=Fasciola gigantica OX=46835 GN=FGIG_01007 PE=4 SV=1	F.gigantica	tr|A0A504YIP0|A0A504YIP0_FASGI	2	2	11.64	189	21616.8	--	--	--	--	--
Uncharacterized protein OS=Fasciola gigantica OX=46835 GN=FGIG_01347 PE=4 SV=1	F.gigantica	tr|A0A504YKL8|A0A504YKL8_FASGI	2	2	13.39	239	26798.4	--	--	--	--	--
Serine/threonine protein phosphatase 2A regulatory subunit OS=Fasciola gigantica OX=46835 GN=FGIG_06791 PE=3 SV=1	F.gigantica	tr|A0A504YXZ1|A0A504YXZ1_FASGI	2	2	5.858	478	55791.2	cellular process;biological regulation	protein-containing complex;cellular anatomical entity	molecular function regulator;binding	--	mRNA surveillance pathway
Orotidine 5'-phosphate decarboxylase OS=Fasciola gigantica OX=46835 GN=FGIG_07808 PE=3 SV=1	F.gigantica	tr|A0A504YFY9|A0A504YFY9_FASGI	2	2	2.065	1550	171025	cellular process;metabolic process	cellular anatomical entity	catalytic activity	--	Biosynthesis of cofactors; Metabolic pathways; Drug metabolism - other enzymes; Pyrimidine metabolism
Putative Ras-related protein Rab-10 OS=Fasciola gigantica OX=46835 GN=FGIG_06242 PE=2 SV=1	F.gigantica	tr|A0A3G4YQA0|A0A3G4YQA0_FASGI	3	3	13.66	205	23090.3	--	--	--	--	Endocytosis
Uncharacterized protein (Fragment) OS=Fasciola gigantica OX=46835 GN=FGIG_08173 PE=4 SV=1	F.gigantica	tr|A0A504Y8Q2|A0A504Y8Q2_FASGI	2	2	6.863	408	46054	--	--	--	--	--
Superoxide dismutase (Fragment) OS=Fasciola gigantica OX=46835 GN=FGIG_05938 PE=3 SV=1	F.gigantica	tr|A0A504YQ65|A0A504YQ65_FASGI	2	2	35.71	140	15515.3	biological regulation	--	--	Inorganic ion transport and metabolism	Huntington disease; Lipid and atherosclerosis; Longevity regulating pathway; Longevity regulating pathway - multiple species; Peroxisome; FoxO signaling pathway; Chemical carcinogenesis - reactive oxygen species
Ubiquitin conjugating enzyme OS=Fasciola gigantica OX=46835 GN=FGIG_10388 PE=3 SV=1	F.gigantica	tr|A0A504YV37|A0A504YV37_FASGI	2	2	19.73	147	16556.6	immune system process;cellular process;reproductive process;metabolic process;biological regulation;multicellular organismal process;developmental process;response to stimulus	protein-containing complex;cellular anatomical entity	binding;catalytic activity	Posttranslational modification, protein turnover, chaperones	Ubiquitin mediated proteolysis; Protein processing in endoplasmic reticulum
Leucine-rich repeat-containing protein 23 OS=Fasciola gigantica OX=46835 GN=FGIG_07287 PE=4 SV=1	F.gigantica	tr|A0A504YJ46|A0A504YJ46_FASGI	2	2	8.108	370	41718.2	--	--	--	--	--
Loss of heterozygosity 11 chromosomal region 2 protein OS=Fasciola gigantica OX=46835 GN=FGIG_05409 PE=4 SV=1	F.gigantica	tr|A0A504WSX7|A0A504WSX7_FASGI	1	1	1.801	833	91587.1	--	--	--	Coenzyme transport and metabolism;Function unknown;General function prediction only;Signal transduction mechanisms	--
Peroxidase OS=Fasciola gigantica OX=46835 GN=FGIG_04138 PE=4 SV=1	F.gigantica	tr|A0A504YSS8|A0A504YSS8_FASGI	2	2	2.398	1418	159635	response to stimulus;metabolic process;cellular process	cellular anatomical entity	binding;catalytic activity	Secondary metabolites biosynthesis, transport and catabolism;Cell wall/membrane/envelope biogenesis	--
Rab GDP dissociation inhibitor (Fragment) OS=Fasciola gigantica OX=46835 GN=FGIG_12698 PE=3 SV=1	F.gigantica	tr|A0A504YC55|A0A504YC55_FASGI	4	2	36.67	180	20115.3	developmental process;cellular process;reproduction;biological regulation;multicellular organismal process	cellular anatomical entity	catalytic activity;molecular function regulator	--	--
Ras protein O-Krev OS=Fasciola gigantica OX=46835 GN=FGIG_05689 PE=3 SV=1	F.gigantica	tr|A0A504YZP1|A0A504YZP1_FASGI	2	2	12.5	184	20886.7	biological regulation;multicellular organismal process;cellular process;developmental process;locomotion;response to stimulus	cellular anatomical entity	binding;catalytic activity	--	Long-term potentiation; Platelet activation; cAMP signaling pathway; Leukocyte transendothelial migration; Ras signaling pathway; Focal adhesion; Rap1 signaling pathway; Neurotrophin signaling pathway; Lipid and atherosclerosis; Renal cell carcinoma; MAPK signaling pathway; Cushing syndrome; Chemokine signaling pathway; Pancreatic secretion
Peptidase_M1_N domain-containing protein OS=Fasciola gigantica OX=46835 GN=FGIG_08037 PE=4 SV=1	F.gigantica	tr|A0A504YFS4|A0A504YFS4_FASGI	2	2	18.12	138	15523.8	--	--	catalytic activity	Amino acid transport and metabolism	--
Serine/threonine-protein kinase PAK OS=Fasciola gigantica OX=46835 GN=FGIG_05419 PE=3 SV=1	F.gigantica	tr|A0A504YKR3|A0A504YKR3_FASGI	2	2	4.792	480	54276.1	biological regulation;developmental process;immune system process;cellular process;response to stimulus	cellular anatomical entity	catalytic activity;binding	Cell wall/membrane/envelope biogenesis	--
Receptor Mediated Endocytosis OS=Fasciola gigantica OX=46835 GN=FGIG_02145 PE=4 SV=1	F.gigantica	tr|A0A504Z6J5|A0A504Z6J5_FASGI	1	1	2.564	546	62259	multicellular organismal process;biological regulation;metabolic process;localization;developmental process;cellular process;reproductive process	cellular anatomical entity	binding;catalytic activity	General function prediction only	Endocytosis
Translationally controlled tumor-associated OS=Fasciola gigantica OX=46835 GN=FGIG_03252 PE=3 SV=1	F.gigantica	tr|A0A504Y9U6|A0A504Y9U6_FASGI	2	2	11.24	169	19896.4	biological regulation;biological process involved in interspecies interaction between organisms;response to stimulus	cellular anatomical entity;protein-containing complex	binding	--	--
Suppressor of profilin 2 OS=Fasciola gigantica OX=46835 GN=FGIG_12414 PE=3 SV=1	F.gigantica	tr|A0A504YMI1|A0A504YMI1_FASGI	2	2	7.424	229	25323.8	biological adhesion;reproductive process;cellular process;response to stimulus;multicellular organismal process;biological regulation;localization;developmental process	protein-containing complex;cellular anatomical entity	binding	--	Endocytosis
Uncharacterized protein OS=Fasciola gigantica OX=46835 GN=FGIG_05183 PE=4 SV=1	F.gigantica	tr|A0A504Y5V7|A0A504Y5V7_FASGI	2	2	15.84	202	22426.3	--	--	--	--	--
Dihydrolipoamide acetyltransferase component of pyruvate dehydrogenase complex OS=Fasciola gigantica OX=46835 GN=FGIG_08469 PE=3 SV=1	F.gigantica	tr|A0A504YEA7|A0A504YEA7_FASGI	2	2	5.251	419	45555.4	--	--	--	Energy production and conversion	Propanoate metabolism; Metabolic pathways; Valine, leucine and isoleucine degradation
Gastric triacylglycerol lipase OS=Fasciola gigantica OX=46835 GN=FGIG_12478 PE=4 SV=1	F.gigantica	tr|A0A504WWG8|A0A504WWG8_FASGI	2	2	12.99	254	28744.9	response to stimulus;metabolic process;multicellular organismal process;cellular process	cellular anatomical entity	catalytic activity	--	Steroid biosynthesis; Lysosome
Ubiquitin-conjugating enzyme E2 Z OS=Fasciola gigantica OX=46835 GN=FGIG_04311 PE=4 SV=1	F.gigantica	tr|A0A504Z0A7|A0A504Z0A7_FASGI	2	2	8.029	274	31106	--	--	--	--	Ubiquitin mediated proteolysis
Placenta-specificprotein 8 protein OS=Fasciola gigantica OX=46835 GN=FGIG_07833 PE=3 SV=1	F.gigantica	tr|A0A504YXV3|A0A504YXV3_FASGI	3	3	44.35	115	13234.2	--	--	--	--	--
F-actin-capping protein subunit beta OS=Fasciola gigantica OX=46835 GN=FGIG_03122 PE=3 SV=1	F.gigantica	tr|A0A504Z3F4|A0A504Z3F4_FASGI	2	2	9.455	275	31098.9	biological adhesion;developmental process;cellular process;multicellular organismal process;biological regulation	cellular anatomical entity;protein-containing complex	binding	--	Endocytosis
Seryl-tRNA synthetase OS=Fasciola gigantica OX=46835 GN=FGIG_09040 PE=4 SV=1	F.gigantica	tr|A0A504Z024|A0A504Z024_FASGI	2	2	5.752	452	49893	metabolic process;biological regulation;multicellular organismal process;cellular process;developmental process;reproduction;locomotion	cellular anatomical entity	catalytic activity;binding	Translation, ribosomal structure and biogenesis	Aminoacyl-tRNA biosynthesis
Tegumental calcium-binding EF-hand protein 4 OS=Fasciola gigantica OX=46835 GN=FGIG_09303 PE=4 SV=1	F.gigantica	tr|A0A504YZT4|A0A504YZT4_FASGI	2	2	13.76	189	22284.4	biological regulation;cellular process	protein-containing complex;cellular anatomical entity	binding	--	--
Histone H2B OS=Fasciola gigantica OX=46835 GN=FGIG_11587 PE=3 SV=1; Histone H2B OS=Fasciola gigantica OX=46835 GN=FGIG_02169 PE=3 SV=1	F.gigantica	tr|A0A504Z6J7|A0A504Z6J7_FASGI;tr|A0A504Y6T2|A0A504Y6T2_FASGI	1	1	12.3	122	13676.9	--	--	--	--	--
Ubiquitin-conjugating enzyme OS=Fasciola gigantica OX=46835 GN=FGIG_06690 PE=3 SV=1	F.gigantica	tr|A0A504Z296|A0A504Z296_FASGI	3	3	26.06	165	19063.1	response to stimulus;biological regulation;metabolic process;cellular process	cellular anatomical entity	binding;transcription regulator activity;catalytic activity;molecular function regulator	--	Ubiquitin mediated proteolysis
Glucose-regulated protein 94 OS=Fasciola gigantica OX=46835 GN=FGIG_08009 PE=3 SV=1	F.gigantica	tr|A0A504Z041|A0A504Z041_FASGI	4	2	5.623	818	92318	response to stimulus;multicellular organismal process;biological regulation;metabolic process;localization;developmental process;cellular process	--	binding	Posttranslational modification, protein turnover, chaperones	Protein processing in endoplasmic reticulum
Uncharacterized protein OS=Fasciola gigantica OX=46835 GN=FGIG_02369 PE=4 SV=1	F.gigantica	tr|A0A504Y554|A0A504Y554_FASGI	2	2	2.772	1010	110847	--	--	--	--	--
Puromycin-sensitive aminopeptidase OS=Fasciola gigantica OX=46835 GN=FGIG_11864 PE=4 SV=1	F.gigantica	tr|A0A504Y7V0|A0A504Y7V0_FASGI	3	3	20.24	252	28395.8	biological regulation;metabolic process;cellular process;response to stimulus	cellular anatomical entity	binding;catalytic activity	Amino acid transport and metabolism	--
Neuroserpin OS=Fasciola gigantica OX=46835 GN=FGIG_01893 PE=3 SV=1	F.gigantica	tr|A0A504YR08|A0A504YR08_FASGI	2	2	6.143	407	45990.8	--	--	--	Posttranslational modification, protein turnover, chaperones	--
Phosphatidylinositol transfer protein alpha OS=Fasciola gigantica OX=46835 GN=FGIG_05603 PE=4 SV=1	F.gigantica	tr|A0A504YI44|A0A504YI44_FASGI	2	2	8.374	203	23210.6	cellular process;developmental process;localization;multicellular organismal process	cellular anatomical entity	transporter activity;binding	--	--
Fh47 OS=Fasciola gigantica OX=46835 GN=FGIG_10895 PE=4 SV=1	F.gigantica	tr|A0A504ZC40|A0A504ZC40_FASGI	4	3	15.46	207	23963.4	metabolic process;cellular process	cellular anatomical entity	binding;catalytic activity	--	Chemical carcinogenesis - reactive oxygen species; Metabolism of xenobiotics by cytochrome P450; Platinum drug resistance; Fluid shear stress and atherosclerosis; Drug metabolism - cytochrome P450; Hepatocellular carcinoma; Drug metabolism - other enzymes; Glutathione metabolism; Chemical carcinogenesis - receptor activation; Chemical carcinogenesis - DNA adducts; Metabolic pathways; Pathways in …
Serine/threonine-protein phosphatase CPPED1 OS=Fasciola gigantica OX=46835 GN=FGIG_02876 PE=4 SV=1	F.gigantica	tr|A0A504YHF5|A0A504YHF5_FASGI	2	2	7.006	314	35760.8	--	--	--	Signal transduction mechanisms	--
Dysferlin limb girdle muscular dystrophy 2B OS=Fasciola gigantica OX=46835 GN=FGIG_08768 PE=4 SV=1	F.gigantica	tr|A0A504YLF9|A0A504YLF9_FASGI	2	2	9.96	251	28564.9	multicellular organismal process;developmental process;cellular process;response to stimulus	cellular anatomical entity	binding	--	--
DnaJ like protein subfamily A member 1 OS=Fasciola gigantica OX=46835 GN=FGIG_04609 PE=3 SV=1	F.gigantica	tr|A0A504Z4Z3|A0A504Z4Z3_FASGI	1	1	4.975	402	44794.4	reproductive process;locomotion;localization;developmental process;cellular process;biological regulation	cellular anatomical entity	binding	Posttranslational modification, protein turnover, chaperones	Protein processing in endoplasmic reticulum
T-complex protein 1 subunit delta OS=Fasciola gigantica OX=46835 GN=FGIG_01563 PE=3 SV=1	F.gigantica	tr|A0A504YLW7|A0A504YLW7_FASGI	1	1	2.407	540	58291.9	--	--	--	Posttranslational modification, protein turnover, chaperones	--
ADP-ribosyl cyclase/cyclic ADP-ribose hydrolase OS=Fasciola gigantica OX=46835 GN=FGIG_04434 PE=3 SV=1	F.gigantica	tr|A0A504YMY5|A0A504YMY5_FASGI	3	3	12.89	287	32362	--	--	--	--	--
Uncharacterized protein OS=Fasciola gigantica OX=46835 GN=FGIG_07788 PE=4 SV=1	F.gigantica	tr|A0A504Y7T1|A0A504Y7T1_FASGI	3	2	5.83	446	49615.8	--	--	--	--	--
Rho gtp-binding protein rhoc OS=Fasciola gigantica OX=46835 GN=FGIG_06759 PE=4 SV=1	F.gigantica	tr|A0A504YLF6|A0A504YLF6_FASGI	2	2	10.94	192	21889.1	locomotion;biological regulation;developmental process;cellular process;localization	cellular anatomical entity	binding	--	Wnt signaling pathway; mTOR signaling pathway; Endocytosis; TGF-beta signaling pathway
Cardiac muscle alpha actin OS=Fasciola gigantica OX=46835 GN=FGIG_11050 PE=3 SV=1	F.gigantica	tr|A0A504YYH3|A0A504YYH3_FASGI	14	4	40	375	41696.3	--	cellular anatomical entity	binding	Cytoskeleton	Phototransduction - fly; Phagosome; Hippo signaling pathway - fly
Otoferlin OS=Fasciola gigantica OX=46835 GN=FGIG_08770 PE=4 SV=1	F.gigantica	tr|A0A504YPE7|A0A504YPE7_FASGI	2	2	3.588	641	74594.4	--	--	--	--	--
Uncharacterized protein OS=Fasciola gigantica OX=46835 GN=FGIG_12183 PE=4 SV=1	F.gigantica	tr|A0A504Y6B9|A0A504Y6B9_FASGI	1	1	4.062	320	36858.2	--	--	--	--	--
Cullin-domain-containing protein OS=Fasciola gigantica OX=46835 GN=FGIG_11337 PE=3 SV=1	F.gigantica	tr|A0A504YPQ5|A0A504YPQ5_FASGI	2	2	3.817	524	60798.2	cellular process;developmental process;metabolic process;biological regulation;response to stimulus;reproductive process	cellular anatomical entity;protein-containing complex	binding	--	Nucleotide excision repair; Ubiquitin mediated proteolysis
Serine/threonine-protein phosphatase 2A 65 kDa regulatory subunit A alpha isoform OS=Fasciola gigantica OX=46835 GN=FGIG_10421 PE=4 SV=1	F.gigantica	tr|A0A504Z0C8|A0A504Z0C8_FASGI	1	1	2.183	504	56565.6	biological regulation;cellular process	--	--	--	TGF-beta signaling pathway; Hippo signaling pathway - fly; mRNA surveillance pathway
Bisphosphate nucleotidase 1 OS=Fasciola gigantica OX=46835 GN=FGIG_00873 PE=3 SV=1	F.gigantica	tr|A0A504YZ18|A0A504YZ18_FASGI	1	1	6.728	327	34769.9	cellular process;metabolic process	--	catalytic activity	Carbohydrate transport and metabolism;Inorganic ion transport and metabolism	Metabolic pathways; Sulfur metabolism
Eukaryotic translation initiation factor 5A OS=Fasciola gigantica OX=46835 GN=FGIG_02894 PE=3 SV=1	F.gigantica	tr|A0A504YWG8|A0A504YWG8_FASGI	1	1	6.452	186	20646.1	--	--	--	Translation, ribosomal structure and biogenesis	--
Activator of 90 kDa heat shock protein ATPase 1 (Fragment) OS=Fasciola gigantica OX=46835 GN=FGIG_12017 PE=3 SV=1	F.gigantica	tr|A0A504YJB7|A0A504YJB7_FASGI	1	1	14.29	133	14865.7	biological regulation;response to stimulus	cellular anatomical entity	molecular function regulator;binding	--	--
Adenylate kinase isoenzyme 1 OS=Fasciola gigantica OX=46835 GN=FGIG_02159 PE=3 SV=1	F.gigantica	tr|A0A504Y532|A0A504Y532_FASGI	1	1	8.824	136	14963.3	developmental process;cellular process;metabolic process;biological regulation;response to stimulus	cellular anatomical entity	catalytic activity;binding	Nucleotide transport and metabolism	Purine metabolism; Thiamine metabolism; Metabolic pathways; Biosynthesis of cofactors
BRO1 domain and CAAX motif containing OS=Fasciola gigantica OX=46835 GN=FGIG_04970 PE=3 SV=1	F.gigantica	tr|A0A504YRB3|A0A504YRB3_FASGI	1	1	2.098	429	48672.6	--	cellular anatomical entity	--	--	--
UDP-glucose 4-epimerase OS=Fasciola gigantica OX=46835 GN=FGIG_08599 PE=3 SV=1	F.gigantica	tr|A0A504Z4Z1|A0A504Z4Z1_FASGI	1	1	7.289	343	38136.5	--	--	--	Cell wall/membrane/envelope biogenesis	Galactose metabolism; Metabolic pathways; Amino sugar and nucleotide sugar metabolism; Biosynthesis of nucleotide sugars
CLAP1 OS=Fasciola gigantica OX=46835 GN=FGIG_06911 PE=4 SV=1	F.gigantica	tr|A0A504YBU1|A0A504YBU1_FASGI	1	1	1.456	1236	136949	locomotion;developmental process;cellular process;localization;biological regulation	cellular anatomical entity	binding	--	--
Fascin domain-containing protein OS=Fasciola gigantica OX=46835 GN=FGIG_05251 PE=3 SV=1	F.gigantica	tr|A0A504YW96|A0A504YW96_FASGI	1	1	4.444	225	24951	biological regulation;multicellular organismal process;developmental process;cellular process;locomotion	cellular anatomical entity	binding	--	--
Serpin OS=Fasciola gigantica OX=46835 GN=FGIG_01892 PE=3 SV=1	F.gigantica	tr|A0A504YJ47|A0A504YJ47_FASGI	2	2	5.147	408	46555.6	--	--	--	Posttranslational modification, protein turnover, chaperones	--
AKAP7_NLS domain-containing protein OS=Fasciola gigantica OX=46835 GN=FGIG_00306 PE=4 SV=1	F.gigantica	tr|A0A504X4V1|A0A504X4V1_FASGI	3	3	16.71	371	43567.1	--	--	--	--	--
Vacuolar protein sorting-associated protein VTA1 OS=Fasciola gigantica OX=46835 GN=FGIG_00132 PE=3 SV=1	F.gigantica	tr|A0A504YNN3|A0A504YNN3_FASGI	1	1	4.167	288	31799.8	viral process;cellular process;localization	cellular anatomical entity	binding	--	Endocytosis
Putative oxidoreductase YjmC (Fragment) OS=Fasciola gigantica OX=46835 GN=FGIG_05062 PE=4 SV=1	F.gigantica	tr|A0A504Z4X6|A0A504Z4X6_FASGI	1	1	12.37	186	20126.9	--	--	catalytic activity	Energy production and conversion	--
Annexin OS=Fasciola gigantica OX=46835 GN=FGIG_02838 PE=3 SV=1	F.gigantica	tr|A0A504YFM5|A0A504YFM5_FASGI	1	1	4.428	271	30763.8	--	--	binding	--	--
Phosphate carrier protein, mitochondrial OS=Fasciola gigantica OX=46835 GN=FGIG_02291 PE=3 SV=1	F.gigantica	tr|A0A504Z057|A0A504Z057_FASGI	1	1	5.079	315	35076.9	metabolic process;localization;cellular process	cellular anatomical entity	binding;transporter activity;structural molecule activity	--	--
Rab protein 7 OS=Fasciola gigantica OX=46835 GN=FGIG_00312 PE=4 SV=1	F.gigantica	tr|A0A504XGX9|A0A504XGX9_FASGI	2	1	9.778	225	25322.7	metabolic process;biological regulation;biological process involved in interspecies interaction between organisms;cellular process;viral process;localization	cellular anatomical entity;protein-containing complex	binding;catalytic activity	--	Mitophagy - animal; Autophagy - animal; Endocytosis; Phagosome
Phosphodiesterase-nucleotide pyrophosphatase OS=Fasciola gigantica OX=46835 GN=FGIG_05818 PE=4 SV=1	F.gigantica	tr|A0A504ZAH2|A0A504ZAH2_FASGI	1	1	4.533	375	42436.3	metabolic process	cellular anatomical entity	catalytic activity	Signal transduction mechanisms	--
Phosphotransferase OS=Fasciola gigantica OX=46835 GN=FGIG_07283 PE=3 SV=1	F.gigantica	tr|A0A504YWR2|A0A504YWR2_FASGI	1	1	2.761	507	56396.2	locomotion;cellular process;metabolic process;biological regulation	cellular anatomical entity	binding;catalytic activity	Carbohydrate transport and metabolism	Carbon metabolism; Starch and sucrose metabolism; Amino sugar and nucleotide sugar metabolism; Glycolysis / Gluconeogenesis; Galactose metabolism; Metabolic pathways; Fructose and mannose metabolism; Biosynthesis of nucleotide sugars
Uncharacterized protein OS=Fasciola gigantica OX=46835 GN=FGIG_00351 PE=4 SV=1	F.gigantica	tr|A0A504Y465|A0A504Y465_FASGI	1	1	6.849	146	17499.2	--	--	--	--	--
Annexin OS=Fasciola gigantica OX=46835 GN=FGIG_11547 PE=3 SV=1	F.gigantica	tr|A0A504YXD8|A0A504YXD8_FASGI	1	1	17.86	84	9335.5	--	--	binding	--	--
WW domain-binding protein 2 OS=Fasciola gigantica OX=46835 GN=FGIG_07734 PE=4 SV=1	F.gigantica	tr|A0A504YUC6|A0A504YUC6_FASGI	1	1	4.153	313	33389.1	--	--	--	--	--
Vesicle-fusing ATPase OS=Fasciola gigantica OX=46835 GN=FGIG_02077 PE=3 SV=1	F.gigantica	tr|A0A504Z0R7|A0A504Z0R7_FASGI	1	1	2.691	446	49001.3	localization;developmental process;viral process;multicellular organismal process;metabolic process;biological regulation;response to stimulus;cellular process	protein-containing complex;cellular anatomical entity	ATP-dependent activity;catalytic activity;binding	Signal transduction mechanisms;Cell cycle control, cell division, chromosome partitioning	Necroptosis; Endocytosis
Ubiquitin conjugating enzyme variant OS=Fasciola gigantica OX=46835 GN=FGIG_08798 PE=4 SV=1	F.gigantica	tr|A0A504Y8J7|A0A504Y8J7_FASGI	2	2	18.12	149	16944.2	response to stimulus;biological regulation;metabolic process;cellular process	cellular anatomical entity;protein-containing complex	catalytic activity;binding	--	--
L-lactate dehydrogenase OS=Fasciola gigantica OX=46835 GN=FGIG_11029 PE=4 SV=1	F.gigantica	tr|A0A504YD01|A0A504YD01_FASGI	1	1	7.487	187	20138.2	cellular process;metabolic process	cellular anatomical entity	catalytic activity	Energy production and conversion	Glycolysis / Gluconeogenesis; Propanoate metabolism; Metabolic pathways; Pyruvate metabolism; Cysteine and methionine metabolism
Low-density lipoprotein receptor OS=Fasciola gigantica OX=46835 GN=FGIG_07880 PE=4 SV=1	F.gigantica	tr|A0A504YIU4|A0A504YIU4_FASGI	1	1	1.22	1475	165204	--	--	--	--	--
SOCS box domain-containing protein OS=Fasciola gigantica OX=46835 GN=FGIG_02852 PE=4 SV=1	F.gigantica	tr|A0A504Z3E6|A0A504Z3E6_FASGI	1	1	3.302	424	49024.6	--	--	--	--	--
Calcium-transporting ATPase OS=Fasciola gigantica OX=46835 GN=FGIG_00477 PE=3 SV=1	F.gigantica	tr|A0A504YYL9|A0A504YYL9_FASGI	1	1	2.02	693	75556.4	reproductive process;cellular process;response to stimulus;locomotion;localization;developmental process;multicellular organismal process;biological regulation	cellular anatomical entity;protein-containing complex	binding;ATP-dependent activity;molecular function regulator;transporter activity	Inorganic ion transport and metabolism	--
CUB domain-containing protein OS=Fasciola gigantica OX=46835 GN=FGIG_07991 PE=4 SV=1	F.gigantica	tr|A0A504YUL5|A0A504YUL5_FASGI	1	1	5.306	245	26863	--	--	--	--	--
Receptor expression-enhancing protein OS=Fasciola gigantica OX=46835 GN=FGIG_09953 PE=3 SV=1	F.gigantica	tr|A0A504YLC6|A0A504YLC6_FASGI	1	1	17.5	120	13771.9	--	cellular anatomical entity	binding	--	--
Ribosomal protein OS=Fasciola gigantica OX=46835 GN=FGIG_11273 PE=3 SV=1	F.gigantica	tr|A0A504YSP9|A0A504YSP9_FASGI	1	1	11.06	208	23984.2	response to stimulus;biological regulation;metabolic process;cellular process;viral process;localization	protein-containing complex;cellular anatomical entity	structural molecule activity;binding	Translation, ribosomal structure and biogenesis	Ribosome
14-3-3 epsilon isoform OS=Fasciola gigantica OX=46835 PE=2 SV=1; 14-3-3 protein epsilon OS=Fasciola gigantica OX=46835 GN=FGIG_12158 PE=3 SV=1	F.gigantica	tr|A0A5S8ZDC9|A0A5S8ZDC9_FASGI;tr|A0A504YKF3|A0A504YKF3_FASGI	3	1	13.62	257	29289	multicellular organismal process;biological regulation;cellular process;developmental process;response to stimulus;reproductive process;locomotion	cellular anatomical entity;protein-containing complex	catalytic activity;binding	--	Hippo signaling pathway - fly
Uncharacterized protein OS=Fasciola gigantica OX=46835 GN=FGIG_06443 PE=4 SV=1	F.gigantica	tr|A0A504YVV3|A0A504YVV3_FASGI	1	1	9.783	92	10705.3	response to stimulus;reproductive process;multicellular organismal process;biological regulation;localization;cellular process;developmental process	cellular anatomical entity;protein-containing complex	structural molecule activity;binding	--	Fc gamma R-mediated phagocytosis; Bacterial invasion of epithelial cells; Endocytosis; Salmonella infection; Regulation of actin cytoskeleton; Tight junction; Yersinia infection
26S proteasome non-ATPase regulatory subunit 5 OS=Fasciola gigantica OX=46835 GN=FGIG_02649 PE=3 SV=1	F.gigantica	tr|A0A504YVU7|A0A504YVU7_FASGI	1	1	2.926	581	64452.8	--	--	--	--	--
COP9 signalosome complex subunit 3 OS=Fasciola gigantica OX=46835 GN=FGIG_00333 PE=3 SV=1	F.gigantica	tr|A0A504YMV7|A0A504YMV7_FASGI	1	1	3.318	422	47955.2	multicellular organismal process;metabolic process;cellular process;developmental process;response to stimulus	cellular anatomical entity;protein-containing complex	binding	--	--
Dymeclin OS=Fasciola gigantica OX=46835 GN=FGIG_08782 PE=3 SV=1	F.gigantica	tr|A0A504YI21|A0A504YI21_FASGI	1	1	1.534	717	79514.4	cellular process;developmental process	cellular anatomical entity	binding	--	--
Putative neutral sphingomyelinase (Fragment) OS=Fasciola gigantica OX=46835 GN=FGIG_06991 PE=3 SV=1	F.gigantica	tr|A0A504Z0W4|A0A504Z0W4_FASGI	1	1	3.302	212	23915.5	--	--	--	--	Metabolic pathways; Sphingolipid metabolism
Tegument antigen OS=Fasciola gigantica OX=46835 GN=FGIG_04680 PE=4 SV=1	F.gigantica	tr|A0A504YFG3|A0A504YFG3_FASGI	1	1	6.383	188	21178.1	--	--	--	--	--
Secreted saposin-like protein SAP-3 OS=Fasciola gigantica OX=46835 PE=2 SV=1	F.gigantica	tr|Q0ZNJ0|Q0ZNJ0_FASGI	1	1	7.843	102	11063	--	--	--	--	--
Thimet oligopeptidase (M03 family) OS=Fasciola gigantica OX=46835 GN=FGIG_08125 PE=3 SV=1	F.gigantica	tr|A0A504YVZ5|A0A504YVZ5_FASGI	1	1	6.593	182	21442.7	cellular process;biological regulation;metabolic process	--	catalytic activity;binding	Posttranslational modification, protein turnover, chaperones	--
NAD(P)H-hydrate epimerase OS=Fasciola gigantica OX=46835 GN=FGIG_03379 PE=3 SV=1	F.gigantica	tr|A0A504YGL1|A0A504YGL1_FASGI	1	1	4.938	243	26633.6	cellular process;metabolic process	cellular anatomical entity	catalytic activity;binding	--	--
Multi-domain cystatin OS=Fasciola gigantica OX=46835 GN=FGIG_02520 PE=4 SV=1	F.gigantica	tr|A0A504ZA07|A0A504ZA07_FASGI	21	1	22.71	1083	124545	biological regulation	--	molecular function regulator	--	--
Actin alpha cardiac muscle 1 OS=Fasciola gigantica OX=46835 GN=FGIG_00115 PE=3 SV=1; Actin alpha cardiac muscle 1 OS=Fasciola gigantica OX=46835 GN=FGIG_07271 PE=3 SV=1	F.gigantica	tr|A0A504YKQ2|A0A504YKQ2_FASGI;tr|A0A504YJ32|A0A504YJ32_FASGI	19	3	52.13	376	41771.4	--	--	--	Cytoskeleton	Tight junction; Phagosome; Adherens junction; Salmonella infection; Regulation of actin cytoskeleton; Focal adhesion; Apoptosis
Putative pyridine nucleotide-disulfide oxidoreductase OS=Fasciola gigantica OX=46835 GN=FGIG_02962 PE=3 SV=1	F.gigantica	tr|A0A504YZM6|A0A504YZM6_FASGI	13	1	33.83	541	60473.2	response to stimulus;cellular process;metabolic process;biological regulation	cellular anatomical entity	catalytic activity;binding;antioxidant activity	Energy production and conversion	Selenocompound metabolism
Fructose-bisphosphatase OS=Fasciola gigantica OX=46835 GN=FGIG_00371 PE=3 SV=1	F.gigantica	tr|A0A504XEA1|A0A504XEA1_FASGI	8	1	38.97	290	31263.5	cellular process;metabolic process	--	catalytic activity;binding	Carbohydrate transport and metabolism	Fructose and mannose metabolism; Pentose phosphate pathway; Glycolysis / Gluconeogenesis; Metabolic pathways; Carbon metabolism
Polyubiquitin-B OS=Fasciola gigantica OX=46835 GN=FGIG_03366 PE=4 SV=1; Polyubiquitin OS=Fasciola gigantica OX=46835 GN=FGIG_08506 PE=4 SV=1	F.gigantica	tr|A0A504YU10|A0A504YU10_FASGI;tr|A0A504YHV3|A0A504YHV3_FASGI	4	1	39.5	119	13227.8	multi-organism process;cellular process;immune system process;reproductive process;multicellular organismal process;biological regulation;metabolic process;localization;developmental process;viral process;response to stimulus	cellular anatomical entity	binding	Posttranslational modification, protein turnover, chaperones	Ubiquitin mediated proteolysis; Mitophagy - animal; Parkinson disease; Kaposi sarcoma-associated herpesvirus infection; Pathways of neurodegeneration - multiple diseases
Myoferlin OS=Fasciola gigantica OX=46835 GN=FGIG_10120 PE=4 SV=1	F.gigantica	tr|A0A504YZZ6|A0A504YZZ6_FASGI	2	1	4.63	540	62272.8	response to stimulus;cellular process;biological regulation;multicellular organismal process	cellular anatomical entity	binding	--	--
Restin OS=Fasciola gigantica OX=46835 GN=FGIG_07807 PE=4 SV=1	F.gigantica	tr|A0A504Y7Z3|A0A504Y7Z3_FASGI	1	1	2.297	566	61874.9	cellular process;developmental process;localization;regulation of biological process	cellular anatomical entity;protein-containing complex	binding	--	--
Beta-galactosidase OS=Fasciola gigantica OX=46835 GN=FGIG_08134 PE=3 SV=1	F.gigantica	tr|A0A504YNM0|A0A504YNM0_FASGI	1	1	1.829	656	74894.6	--	--	--	Carbohydrate transport and metabolism	Lysosome; Glycosaminoglycan degradation; Sphingolipid metabolism; Glycosphingolipid biosynthesis - ganglio series; Other glycan degradation; Galactose metabolism; Metabolic pathways
Transforming growth factor-beta-induced protein ig-h3 (Fragment) OS=Fasciola gigantica OX=46835 GN=FGIG_09414 PE=4 SV=1	F.gigantica	tr|A0A504YAW2|A0A504YAW2_FASGI	1	1	2.491	562	64182.2	multicellular organismal process;cellular process	cellular anatomical entity	binding	General function prediction only	--
SUMO-conjugating enzyme OS=Fasciola gigantica OX=46835 GN=FGIG_01036 PE=3 SV=1	F.gigantica	tr|A0A504YQU8|A0A504YQU8_FASGI	1	1	11.59	138	16123.4	response to stimulus;locomotion;multicellular organismal process;biological regulation;metabolic process;localization;developmental process;reproductive process;cellular process;immune system process	protein-containing complex;cellular anatomical entity	catalytic activity;binding	--	Nucleocytoplasmic transport; Ubiquitin mediated proteolysis
26S proteasome non-ATPase regulatory subunit 6 OS=Fasciola gigantica OX=46835 GN=FGIG_01066 PE=3 SV=1	F.gigantica	tr|A0A504Y596|A0A504Y596_FASGI	1	1	2.941	340	39249.9	biological regulation;metabolic process;immune system process;cellular process;response to stimulus	protein-containing complex;cellular anatomical entity	catalytic activity;binding	--	Proteasome
Cullin-associated and neddylation-dissociated protein 1 OS=Fasciola gigantica OX=46835 GN=FGIG_04346 PE=3 SV=1	F.gigantica	tr|A0A504YTD9|A0A504YTD9_FASGI	1	1	5.932	236	25910.6	biological regulation;metabolic process;cellular process;developmental process	protein-containing complex;cellular anatomical entity	binding	--	--
Programmed cell death protein 6 OS=Fasciola gigantica OX=46835 GN=FGIG_10985 PE=4 SV=1	F.gigantica	tr|A0A504YSV3|A0A504YSV3_FASGI	1	1	11.18	170	19718.5	metabolic process	cellular anatomical entity	catalytic activity;binding	--	--
Retinol dehydrogenase 11 OS=Fasciola gigantica OX=46835 GN=FGIG_10053 PE=4 SV=1	F.gigantica	tr|A0A504YMM7|A0A504YMM7_FASGI	1	1	8.075	322	35683.6	--	--	--	Lipid transport and metabolism;General function prediction only	Biosynthesis of cofactors; Metabolic pathways; Retinol metabolism
Beta/gamma crystallin 'Greek key' domain-containing protein OS=Fasciola gigantica OX=46835 GN=FGIG_03899 PE=3 SV=1	F.gigantica	tr|A0A504YDT4|A0A504YDT4_FASGI	1	1	4.825	228	26111.6	--	--	--	--	--
CD59 protein OS=Fasciola gigantica OX=46835 GN=FGIG_07282 PE=4 SV=1	F.gigantica	tr|A0A504ZF73|A0A504ZF73_FASGI	1	1	8.661	127	14017.2	--	--	--	--	--
LAO/AO transport system kinase OS=Fasciola gigantica OX=46835 GN=FGIG_05773 PE=3 SV=1	F.gigantica	tr|A0A504ZCZ7|A0A504ZCZ7_FASGI	1	1	3.79	343	37305.3	metabolic process;cellular process	cellular anatomical entity	catalytic activity;binding	Posttranslational modification, protein turnover, chaperones	--
Bis(5'-adenosyl)-triphosphatase enpp4 OS=Fasciola gigantica OX=46835 GN=FGIG_04533 PE=4 SV=1	F.gigantica	tr|A0A504Z581|A0A504Z581_FASGI	1	1	5.08	374	42827.7	--	--	--	Signal transduction mechanisms	--
Uncharacterized protein OS=Fasciola gigantica OX=46835 GN=FGIG_12305 PE=4 SV=1	F.gigantica	tr|A0A504Z038|A0A504Z038_FASGI	1	1	7.895	114	12607.5	metabolic process	--	--	--	Biosynthesis of amino acids; Metabolic pathways; Arginine and proline metabolism
Fatty acid amide hydrolase OS=Fasciola gigantica OX=46835 GN=FGIG_11488 PE=3 SV=1	F.gigantica	tr|A0A504YWT2|A0A504YWT2_FASGI	1	1	7.336	259	28043.4	metabolic process;cellular process	cellular anatomical entity	binding;catalytic activity	Translation, ribosomal structure and biogenesis	--
Dynein light chain 1 cytoplasmic OS=Fasciola gigantica OX=46835 GN=FGIG_04468 PE=4 SV=1	F.gigantica	tr|A0A504YUK0|A0A504YUK0_FASGI	1	1	6.989	186	21774.5	--	--	--	--	--
Uncharacterized protein OS=Fasciola gigantica OX=46835 GN=FGIG_01781 PE=4 SV=1	F.gigantica	tr|A0A504YNL8|A0A504YNL8_FASGI	1	1	5	300	32290.4	--	--	--	--	--
Uncharacterized protein OS=Fasciola gigantica OX=46835 GN=FGIG_03705 PE=4 SV=1	F.gigantica	tr|A0A504YML3|A0A504YML3_FASGI	1	1	11.24	89	10039.4	--	--	--	--	--
NAD(+) kinase OS=Fasciola gigantica OX=46835 GN=FGIG_04961 PE=3 SV=1	F.gigantica	tr|A0A504YEN6|A0A504YEN6_FASGI	1	1	6.047	215	24246.8	cellular process;metabolic process	cellular anatomical entity	catalytic activity;binding	Coenzyme transport and metabolism	Nicotinate and nicotinamide metabolism; Biosynthesis of cofactors; Metabolic pathways
Uncharacterized protein OS=Fasciola gigantica OX=46835 GN=FGIG_00713 PE=4 SV=1	F.gigantica	tr|A0A504Y7D7|A0A504Y7D7_FASGI	1	1	4.305	302	33295.1	--	--	--	--	--
Ataxia telangiectasia mutated family protein OS=Fasciola gigantica OX=46835 GN=FGIG_04908 PE=3 SV=1	F.gigantica	tr|A0A504Z337|A0A504Z337_FASGI	1	1	15.44	149	16986.9	--	--	--	--	FoxO signaling pathway; Homologous recombination
Actin-related protein 2 OS=Fasciola gigantica OX=46835 GN=FGIG_09590 PE=3 SV=1	F.gigantica	tr|A0A504Z168|A0A504Z168_FASGI	1	1	5.809	241	26910.9	response to stimulus;locomotion;multicellular organismal process;metabolic process;biological regulation;localization;developmental process;behavior;reproductive process;immune system process;cellular process	protein-containing complex;cellular anatomical entity	structural molecule activity;catalytic activity;binding	Cytoskeleton	Salmonella infection; Endocytosis; Regulation of actin cytoskeleton; Tight junction
Uncharacterized protein (Fragment) OS=Fasciola gigantica OX=46835 GN=FGIG_03525 PE=4 SV=1	F.gigantica	tr|A0A504YQI2|A0A504YQI2_FASGI	1	1	7.471	174	19624.3	--	--	--	--	--
Putative mediator of cell motility 1 OS=Fasciola gigantica OX=46835 GN=FGIG_08836 PE=3 SV=1	F.gigantica	tr|A0A504YHB5|A0A504YHB5_FASGI	1	1	5.346	318	36463.1	biological regulation	cellular anatomical entity	binding	--	--
Coatomer subunit epsilon OS=Fasciola gigantica OX=46835 GN=FGIG_08297 PE=3 SV=1	F.gigantica	tr|A0A504Y7R2|A0A504Y7R2_FASGI	1	1	4.911	224	25337.9	cellular process;localization	cellular anatomical entity	binding	--	--
Uncharacterized protein OS=Fasciola gigantica OX=46835 GN=FGIG_07372 PE=4 SV=1	F.gigantica	tr|A0A504WY94|A0A504WY94_FASGI	1	1	19.26	135	14008.6	--	--	--	--	--
Sestrin OS=Fasciola gigantica OX=46835 GN=FGIG_00252 PE=3 SV=1	F.gigantica	tr|A0A504Z1Q4|A0A504Z1Q4_FASGI	1	1	2.201	636	72491.3	--	--	--	--	--
ATP-citrate synthase OS=Fasciola gigantica OX=46835 GN=FGIG_04237 PE=3 SV=1	F.gigantica	tr|A0A504YTY0|A0A504YTY0_FASGI	2	2	2.191	1141	125593	biological regulation;metabolic process;cellular process	cellular anatomical entity;protein-containing complex	catalytic activity;binding	--	Metabolic pathways; Citrate cycle (TCA cycle)
Programmed cell death protein 6 OS=Fasciola gigantica OX=46835 GN=FGIG_12457 PE=4 SV=1	F.gigantica	tr|A0A504YP20|A0A504YP20_FASGI	1	1	6.471	170	19855.5	metabolic process	cellular anatomical entity	binding;catalytic activity	--	--
DUF5743 domain-containing protein OS=Fasciola gigantica OX=46835 GN=FGIG_07281 PE=4 SV=1	F.gigantica	tr|A0A504Z4S6|A0A504Z4S6_FASGI	1	1	0.9913	807	90022.1	--	--	--	--	--
Programmed cell death 6-interacting protein OS=Fasciola gigantica OX=46835 GN=FGIG_11343 PE=4 SV=1	F.gigantica	tr|A0A504YLN3|A0A504YLN3_FASGI	1	1	12.24	98	10840.3	reproductive process;cellular process;localization;biological regulation	cellular anatomical entity	binding	--	Endocytosis
Neurogenic locus notch protein (Fragment) OS=Fasciola gigantica OX=46835 GN=FGIG_12691 PE=4 SV=1	F.gigantica	tr|A0A504YES4|A0A504YES4_FASGI	1	1	11.11	153	17347.1	--	--	--	--	--
DM9 domain-containing protein OS=Fasciola gigantica OX=46835 GN=FGIG_11523 PE=4 SV=1	F.gigantica	tr|A0A504YBL5|A0A504YBL5_FASGI	1	1	9.554	157	17446.6	--	--	--	--	--
26S proteasome non-ATPase regulatory subunit 13 OS=Fasciola gigantica OX=46835 GN=FGIG_09948 PE=3 SV=1	F.gigantica	tr|A0A504YLZ3|A0A504YLZ3_FASGI	1	1	2.375	421	48287.3	response to stimulus;biological regulation;metabolic process;developmental process;immune system process;cellular process	protein-containing complex;cellular anatomical entity	structural molecule activity	--	Proteasome
Ras protein Rab-5C OS=Fasciola gigantica OX=46835 GN=FGIG_12164 PE=4 SV=1	F.gigantica	tr|A0A504XMC1|A0A504XMC1_FASGI	1	1	15.2	125	14074.1	immune system process;cellular process;localization;biological regulation	cellular anatomical entity	binding;catalytic activity	--	--
Transmembrane protein 33 OS=Fasciola gigantica OX=46835 GN=FGIG_06003 PE=3 SV=1	F.gigantica	tr|A0A504YAS2|A0A504YAS2_FASGI	1	1	8.387	155	17179.1	--	cellular anatomical entity	--	--	Nucleocytoplasmic transport
Pyruvate kinase OS=Fasciola gigantica OX=46835 GN=FGIG_07077 PE=3 SV=1	F.gigantica	tr|A0A504Y630|A0A504Y630_FASGI	1	1	1.933	569	62169.7	developmental process;cellular process;metabolic process;response to stimulus	cellular anatomical entity	binding;catalytic activity	Signal transduction mechanisms;Carbohydrate transport and metabolism	Glycolysis / Gluconeogenesis; Biosynthesis of amino acids; Carbon metabolism; Metabolic pathways; Biosynthesis of cofactors; Pyruvate metabolism
Hydroxyacylglutathione mitochondrial OS=Fasciola gigantica OX=46835 GN=FGIG_03061 PE=3 SV=1	F.gigantica	tr|A0A504YWQ6|A0A504YWQ6_FASGI	2	2	5.364	261	28960.9	reproductive process;metabolic process;developmental process;cellular process	cellular anatomical entity	catalytic activity	General function prediction only	Pyruvate metabolism; Metabolic pathways
p25-alpha domain containing protein OS=Fasciola gigantica OX=46835 GN=FGIG_09970 PE=3 SV=1	F.gigantica	tr|A0A504YNN2|A0A504YNN2_FASGI	1	1	7.453	161	18005.1	--	--	--	--	--
Myosin-XV OS=Fasciola gigantica OX=46835 GN=FGIG_03967 PE=3 SV=1	F.gigantica	tr|A0A504Z065|A0A504Z065_FASGI	1	1	0.7004	1999	225821	--	cellular anatomical entity	binding	--	--
FAD_binding_6 domain-containing protein OS=Fasciola gigantica OX=46835 GN=FGIG_10267 PE=4 SV=1	F.gigantica	tr|A0A504Z3H2|A0A504Z3H2_FASGI	1	1	6.557	183	19928.8	metabolic process;cellular process;localization	cellular anatomical entity	binding	--	Amino sugar and nucleotide sugar metabolism
Putative tgc transglutaminase/protease domain-containing protein involved in cytokinesis OS=Fasciola gigantica OX=46835 GN=FGIG_07315 PE=4 SV=1	F.gigantica	tr|A0A504YY26|A0A504YY26_FASGI	2	2	2.041	980	109737	--	--	--	Cell cycle control, cell division, chromosome partitioning	--
Programmed cell death 6-interacting protein OS=Fasciola gigantica OX=46835 GN=FGIG_11797 PE=4 SV=1	F.gigantica	tr|A0A504YYX2|A0A504YYX2_FASGI	1	1	9.15	153	17779.8	--	--	--	--	Endocytosis
Methylglutaconyl-CoA hydratase OS=Fasciola gigantica OX=46835 GN=FGIG_04663 PE=3 SV=1	F.gigantica	tr|A0A504YIA1|A0A504YIA1_FASGI	1	1	11.02	254	27334.5	metabolic process	--	catalytic activity	Lipid transport and metabolism	Metabolic pathways; Valine, leucine and isoleucine degradation
Eukaryotic polypeptide chain release factor 3 OS=Fasciola gigantica OX=46835 GN=FGIG_12020 PE=4 SV=1	F.gigantica	tr|A0A504YDN6|A0A504YDN6_FASGI	1	1	3.048	525	57960.1	cellular process;biological regulation;metabolic process	protein-containing complex	translation regulator activity;binding;catalytic activity	Translation, ribosomal structure and biogenesis	mRNA surveillance pathway
E2 ubiquitin-conjugating enzyme OS=Fasciola gigantica OX=46835 GN=FGIG_00654 PE=3 SV=1	F.gigantica	tr|A0A504Z4S7|A0A504Z4S7_FASGI	2	2	9.548	199	22100.3	response to stimulus;cellular process;metabolic process;biological regulation	cellular anatomical entity	binding;catalytic activity	--	Ubiquitin mediated proteolysis
Uncharacterized protein OS=Fasciola gigantica OX=46835 GN=FGIG_06060 PE=4 SV=1	F.gigantica	tr|A0A504YRU2|A0A504YRU2_FASGI	1	1	7.738	168	18536.1	--	--	--	--	Protein processing in endoplasmic reticulum
Lysosomal alpha-glucosidase OS=Fasciola gigantica OX=46835 GN=FGIG_05015 PE=3 SV=1	F.gigantica	tr|A0A504YSY0|A0A504YSY0_FASGI	1	1	0.9077	1322	149139	--	--	--	Carbohydrate transport and metabolism	--
Uncharacterized protein OS=Fasciola gigantica OX=46835 GN=FGIG_02080 PE=4 SV=1	F.gigantica	tr|A0A504YCE2|A0A504YCE2_FASGI	1	1	6.154	195	21957.9	--	--	--	--	--
Uncharacterized protein OS=Fasciola gigantica OX=46835 GN=FGIG_10428 PE=4 SV=1	F.gigantica	tr|A0A504YPP7|A0A504YPP7_FASGI	1	1	4.061	394	45698.4	--	--	--	--	--
Coatomer subunit gamma OS=Fasciola gigantica OX=46835 GN=FGIG_02657 PE=3 SV=1	F.gigantica	tr|A0A504YX03|A0A504YX03_FASGI	1	1	1.987	906	100766	cellular process;localization	protein-containing complex;cellular anatomical entity	binding;structural molecule activity	--	--
NEDD8-activating enzyme E1 regulatory subunit OS=Fasciola gigantica OX=46835 GN=FGIG_00893 PE=3 SV=1	F.gigantica	tr|A0A504YIW4|A0A504YIW4_FASGI	2	2	2.508	638	71935.2	biological regulation;cellular process	--	catalytic activity;binding	--	--
Nuclear migration protein nudc OS=Fasciola gigantica OX=46835 GN=FGIG_08789 PE=4 SV=1	F.gigantica	tr|A0A504YU67|A0A504YU67_FASGI	1	1	4.082	294	34055.7	--	--	--	--	--
Chaperonin containing T-complex polypeptide subunit zeta OS=Fasciola gigantica OX=46835 GN=FGIG_03371 PE=3 SV=1	F.gigantica	tr|A0A504YPN0|A0A504YPN0_FASGI	2	2	4.936	547	59738.6	reproductive process;cellular process;localization;biological regulation	cellular anatomical entity;protein-containing complex	protein folding chaperone;binding	Posttranslational modification, protein turnover, chaperones	--
Golgi-associated plant pathogenesis protein 1 OS=Fasciola gigantica OX=46835 GN=FGIG_10604 PE=4 SV=1	F.gigantica	tr|A0A504Z204|A0A504Z204_FASGI	1	1	2.716	405	43858.4	--	--	--	Cell cycle control, cell division, chromosome partitioning;General function prediction only	--
Retinol dehydrogenase 12 OS=Fasciola gigantica OX=46835 GN=FGIG_01698 PE=3 SV=1	F.gigantica	tr|A0A504YAT2|A0A504YAT2_FASGI	1	1	3.846	338	37665.9	--	--	--	Lipid transport and metabolism;General function prediction only	Metabolic pathways; Biosynthesis of cofactors; Retinol metabolism
Proteasome subunit beta OS=Fasciola gigantica OX=46835 GN=FGIG_00148 PE=3 SV=1	F.gigantica	tr|A0A504WY58|A0A504WY58_FASGI	1	1	8.78	205	23085.4	response to stimulus;immune system process;cellular process;biological regulation;metabolic process	protein-containing complex;cellular anatomical entity	catalytic activity;binding	Posttranslational modification, protein turnover, chaperones	Proteasome
Glutathione synthetase OS=Fasciola gigantica OX=46835 GN=FGIG_07009 PE=3 SV=1	F.gigantica	tr|A0A504Y6E5|A0A504Y6E5_FASGI	1	1	2.74	511	58108.3	metabolic process;cellular process;developmental process;response to stimulus	--	binding;catalytic activity	--	Cysteine and methionine metabolism; Metabolic pathways; Biosynthesis of cofactors; Glutathione metabolism
Ubiquitin carboxyl-terminal hydrolase OS=Fasciola gigantica OX=46835 GN=FGIG_06318 PE=3 SV=1	F.gigantica	tr|A0A504YC83|A0A504YC83_FASGI	1	1	1.081	925	102737	biological regulation;metabolic process;cellular process	--	binding;catalytic activity	--	--
Uncharacterized protein OS=Fasciola gigantica OX=46835 GN=FGIG_03580 PE=4 SV=1	F.gigantica	tr|A0A504YDY2|A0A504YDY2_FASGI	1	1	1.976	506	57493.2	--	--	--	--	Protein processing in endoplasmic reticulum
Dysferlin limb girdle muscular dystrophy 2B (Autosomal recessive) OS=Fasciola gigantica OX=46835 GN=FGIG_11072 PE=4 SV=1	F.gigantica	tr|A0A504YK58|A0A504YK58_FASGI	1	1	4.592	196	22700.5	cellular process;biological regulation;response to stimulus	cellular anatomical entity	binding	--	--
Isoamyl acetate-hydrolyzing esterase 1 homolog OS=Fasciola gigantica OX=46835 GN=FGIG_10052 PE=3 SV=1	F.gigantica	tr|A0A504YFH4|A0A504YFH4_FASGI	1	1	6.589	258	29434.8	response to stimulus;biological regulation;metabolic process;cellular process	cellular anatomical entity	catalytic activity	--	--
Mitogen-activated protein kinase OS=Fasciola gigantica OX=46835 GN=FGIG_04734 PE=3 SV=1	F.gigantica	tr|A0A504Z1T8|A0A504Z1T8_FASGI	2	1	4.852	371	43167.3	response to stimulus;biological regulation;metabolic process;multicellular organismal process;developmental process;cellular process;immune system process	cellular anatomical entity	binding;catalytic activity	Posttranslational modification, protein turnover, chaperones;Intracellular trafficking, secretion, and vesicular transport;Signal transduction mechanisms;Cell wall/membrane/envelope biogenesis	TGF-beta signaling pathway; FoxO signaling pathway; Autophagy - animal; mTOR signaling pathway
Putative Neurocalcin OS=Fasciola gigantica OX=46835 GN=FGIG_11027 PE=4 SV=1	F.gigantica	tr|A0A504YG94|A0A504YG94_FASGI	1	1	1.292	929	102049	--	--	--	--	Hippo signaling pathway - fly
Glutamyl aminopeptidase OS=Fasciola gigantica OX=46835 GN=FGIG_01288 PE=3 SV=1	F.gigantica	tr|A0A504Z336|A0A504Z336_FASGI	1	1	1.245	1044	121097	multicellular organismal process;metabolic process;cellular process	cellular anatomical entity	binding;catalytic activity	Amino acid transport and metabolism	Metabolic pathways; Glutathione metabolism
NEDD8-activating enzyme E1 catalytic subunit OS=Fasciola gigantica OX=46835 GN=FGIG_07076 PE=3 SV=1	F.gigantica	tr|A0A504YYH7|A0A504YYH7_FASGI	1	1	2.003	749	84092.3	cellular process;metabolic process;biological regulation	cellular anatomical entity	binding;catalytic activity	Inorganic ion transport and metabolism;Coenzyme transport and metabolism;Transcription	Ubiquitin mediated proteolysis
26S proteasome non-ATPase regulatory subunit 3 OS=Fasciola gigantica OX=46835 GN=FGIG_04327 PE=3 SV=1	F.gigantica	tr|A0A504YBM6|A0A504YBM6_FASGI	1	1	1.887	477	54919.1	immune system process;cellular process;biological regulation;metabolic process;response to stimulus	cellular anatomical entity;protein-containing complex	molecular function regulator;binding	--	Proteasome
D-aspartate oxidase OS=Fasciola gigantica OX=46835 GN=FGIG_07464 PE=3 SV=1	F.gigantica	tr|A0A504YPX4|A0A504YPX4_FASGI	1	1	3.085	389	42494.5	--	--	--	Amino acid transport and metabolism	Metabolic pathways; D-Amino acid metabolism; Peroxisome; Alanine, aspartate and glutamate metabolism
LanC protein 1 OS=Fasciola gigantica OX=46835 GN=FGIG_04576 PE=4 SV=1	F.gigantica	tr|A0A504YRP7|A0A504YRP7_FASGI	1	1	5.018	279	30885	--	--	--	--	--
Nicotinamide phosphoribosyltransferase OS=Fasciola gigantica OX=46835 GN=FGIG_11631 PE=4 SV=1	F.gigantica	tr|A0A504YI31|A0A504YI31_FASGI	2	2	11.11	216	24876.3	--	--	--	Coenzyme transport and metabolism	Metabolic pathways; Nicotinate and nicotinamide metabolism
Uncharacterized protein (Fragment) OS=Fasciola gigantica OX=46835 GN=FGIG_08085 PE=3 SV=1	F.gigantica	tr|A0A504YX05|A0A504YX05_FASGI	1	1	3.976	327	36454.4	--	--	--	--	--
Vitellogenic cathepsin-B like protease OS=Fasciola gigantica OX=46835 GN=FGIG_08898 PE=3 SV=1	F.gigantica	tr|A0A504Z0F3|A0A504Z0F3_FASGI	1	1	3.54	339	38125.5	--	--	--	Posttranslational modification, protein turnover, chaperones	Autophagy - animal; Lysosome

## Sheet: A1W20
Names	Species	Acc	#Peptide	#Unique Peptide	Coverage(%)	Length	Mass	GO function(Biological Process)	GO function(Cellular Component)	GO function(Molecular Function)	COG_function	Kegg_function
L-plastin OS=Fasciola gigantica OX=46835 GN=FGIG_03928 PE=4 SV=1	F.gigantica	tr|A0A504YSL7|A0A504YSL7_FASGI	90	90	79.69	650	73873.6	--	--	--	--	--
Alpha-actinin sarcomeric OS=Fasciola gigantica OX=46835 GN=FGIG_01730 PE=4 SV=1	F.gigantica	tr|A0A504WV76|A0A504WV76_FASGI	47	45	72.1	423	49371.2	response to stimulus;metabolic process;biological regulation;multicellular organismal process;developmental process;behavior;cellular process	cellular anatomical entity	catalytic activity;binding;structural molecule activity	--	--
Glutamate dehydrogenase OS=Fasciola gigantica OX=46835 GN=FGIG_08468 PE=3 SV=1	F.gigantica	tr|A0A504YK79|A0A504YK79_FASGI	39	39	59.55	534	58745	behavior;developmental process;cellular process;multicellular organismal process;metabolic process;biological regulation;response to stimulus	cellular anatomical entity	catalytic activity;binding	Amino acid transport and metabolism	Necroptosis; Nitrogen metabolism; Alanine, aspartate and glutamate metabolism; Proximal tubule bicarbonate reclamation; Carbon metabolism; Arginine biosynthesis; Metabolic pathways
Phosphoenolpyruvate carboxykinase (GTP) OS=Fasciola gigantica OX=46835 GN=FGIG_03867 PE=3 SV=1	F.gigantica	tr|A0A504YUP2|A0A504YUP2_FASGI	35	35	64.55	550	61415.2	metabolic process	cellular anatomical entity	catalytic activity;binding	Energy production and conversion	FoxO signaling pathway; Pyruvate metabolism; Citrate cycle (TCA cycle); Glycolysis / Gluconeogenesis; Metabolic pathways
Thioredoxin peroxidase 1 OS=Fasciola gigantica OX=46835 GN=TPx-1 PE=2 SV=1; Thiol-specific antioxidant OS=Fasciola gigantica OX=46835 GN=FGIG_06158 PE=4 SV=1	F.gigantica	tr|C7EAA3|C7EAA3_FASGI;tr|A0A504YJL0|A0A504YJL0_FASGI	36	36	83.03	218	24632.9	--	--	--	Defense mechanisms	Peroxisome
Alpha-1,4 glucan phosphorylase OS=Fasciola gigantica OX=46835 GN=FGIG_01694 PE=3 SV=1	F.gigantica	tr|A0A504YK53|A0A504YK53_FASGI	27	27	43.21	840	96630.7	metabolic process;biological regulation;cellular process	cellular anatomical entity	binding;catalytic activity	Carbohydrate transport and metabolism	Metabolic pathways; Starch and sucrose metabolism
Heat shock protein heat shock protein 90 alpha OS=Fasciola gigantica OX=46835 GN=FGIG_08056 PE=3 SV=1	F.gigantica	tr|A0A504YG42|A0A504YG42_FASGI	31	28	43.49	722	82427.7	biological adhesion;reproductive process;immune system process;cellular process;biological process involved in interspecies interaction between organisms;locomotion;response to stimulus;developmental process;localization;biological regulation	cellular anatomical entity;protein-containing complex	molecular function regulator;binding;catalytic activity	Posttranslational modification, protein turnover, chaperones	Chemical carcinogenesis - receptor activation; Pathways in cancer; Estrogen signaling pathway; Th17 cell differentiation; Protein processing in endoplasmic reticulum; NOD-like receptor signaling pathway; IL-17 signaling pathway; Lipid and atherosclerosis; Antigen processing and presentation; Progesterone-mediated oocyte maturation; Necroptosis; Prostate cancer; Fluid shear stress and atherosclero…
Multi-domain cystatin OS=Fasciola gigantica OX=46835 GN=MDC PE=2 SV=1	F.gigantica	tr|A0A097GX18|A0A097GX18_FASGI	26	4	18.87	1489	170946	biological regulation	--	molecular function regulator	--	--
Ubiquitin activating enzyme OS=Fasciola gigantica OX=46835 GN=FGIG_01883 PE=3 SV=1	F.gigantica	tr|A0A504Y452|A0A504Y452_FASGI	24	24	32.96	1077	120430	--	--	--	Inorganic ion transport and metabolism	Ubiquitin mediated proteolysis
Leucyl aminopeptidase OS=Fasciola gigantica OX=46835 PE=2 SV=1	F.gigantica	tr|F2YGT5|F2YGT5_FASGI	26	1	50.1	523	56442.2	metabolic process	cellular anatomical entity	catalytic activity;binding	Amino acid transport and metabolism	Metabolic pathways; Glutathione metabolism
Propanoyl-CoA:carbon dioxide ligase subunit alpha OS=Fasciola gigantica OX=46835 GN=FGIG_07092 PE=4 SV=1	F.gigantica	tr|A0A504YJJ4|A0A504YJJ4_FASGI	25	25	39.73	750	82609	cellular process;metabolic process	cellular anatomical entity	binding;catalytic activity	Lipid transport and metabolism	Metabolic pathways; Carbon metabolism; Propanoate metabolism; Valine, leucine and isoleucine degradation; Glyoxylate and dicarboxylate metabolism
Severin OS=Fasciola gigantica OX=46835 GN=FGIG_02947 PE=4 SV=1	F.gigantica	tr|A0A504YFI9|A0A504YFI9_FASGI	24	24	55.53	407	47394.3	--	--	--	--	--
6-phosphogluconate dehydrogenase, decarboxylating OS=Fasciola gigantica OX=46835 GN=FGIG_04067 PE=3 SV=1	F.gigantica	tr|A0A504Z133|A0A504Z133_FASGI	22	22	52.12	495	54361.1	cellular process;metabolic process	cellular anatomical entity	catalytic activity;binding	Carbohydrate transport and metabolism	Pentose phosphate pathway; Glutathione metabolism; Carbon metabolism; Metabolic pathways
Malic enzyme OS=Fasciola gigantica OX=46835 GN=FGIG_09437 PE=3 SV=1	F.gigantica	tr|A0A504YH77|A0A504YH77_FASGI	24	24	50.86	584	63743.6	response to stimulus;metabolic process;biological regulation;cellular process	cellular anatomical entity	catalytic activity;binding	Energy production and conversion	Carbon metabolism; Metabolic pathways; Pyruvate metabolism
Severin OS=Fasciola gigantica OX=46835 GN=FGIG_09162 PE=4 SV=1	F.gigantica	tr|A0A504Z761|A0A504Z761_FASGI	23	23	59.37	379	43100.3	--	--	--	--	--
Heat shock protein 70 OS=Fasciola hepatica OX=6192 GN=HSP70 PE=2 SV=1; Heat shock protein 70 OS=Fasciola gigantica OX=46835 GN=HSP70 PE=2 SV=1	F.gigantica	tr|B1NI98|B1NI98_FASHE;tr|B1NI97|B1NI97_FASGI	22	12	32.4	645	70752.1	growth;metabolic process;biological regulation;localization;developmental process;cellular process	cellular anatomical entity;protein-containing complex	catalytic activity;binding	Posttranslational modification, protein turnover, chaperones	Spliceosome; Endocytosis; Protein processing in endoplasmic reticulum
Alpha-actinin isoform B (Fragment) OS=Fasciola gigantica OX=46835 GN=FGIG_09027 PE=4 SV=1	F.gigantica	tr|A0A504Y787|A0A504Y787_FASGI	23	23	61.11	342	39289.7	biological regulation;cellular process;localization;response to stimulus	cellular anatomical entity;protein-containing complex	binding;transcription regulator activity	--	--
Propionyl-CoA carboxylase beta chain OS=Fasciola gigantica OX=46835 GN=FGIG_01539 PE=4 SV=1	F.gigantica	tr|A0A504YAE5|A0A504YAE5_FASGI	24	24	49.72	535	58544.9	metabolic process;cellular process	protein-containing complex;cellular anatomical entity	binding;catalytic activity	Lipid transport and metabolism	Valine, leucine and isoleucine degradation; Glyoxylate and dicarboxylate metabolism; Propanoate metabolism; Carbon metabolism; Metabolic pathways
Oxoglutarate dehydrogenase (succinyl-transferring) OS=Fasciola gigantica OX=46835 GN=FGIG_04989 PE=3 SV=1	F.gigantica	tr|A0A504Z421|A0A504Z421_FASGI	21	21	24.29	1054	119538	metabolic process;multicellular organismal process;cellular process;developmental process;locomotion	protein-containing complex;cellular anatomical entity	catalytic activity;binding	Energy production and conversion	Citrate cycle (TCA cycle); Carbon metabolism; Metabolic pathways
Dynein heavy chain 1 cytosolic OS=Fasciola gigantica OX=46835 GN=FGIG_00108 PE=3 SV=1	F.gigantica	tr|A0A504YKS2|A0A504YKS2_FASGI	20	20	6.029	4744	541069	cellular process;immune system process;localization	protein-containing complex;cellular anatomical entity	cytoskeletal motor activity;binding;ATP-dependent activity;catalytic activity	--	Vasopressin-regulated water reabsorption; Salmonella infection; Phagosome
Sarcoplasmic calcium-binding protein OS=Fasciola gigantica OX=46835 GN=FGIG_07128 PE=4 SV=1	F.gigantica	tr|A0A504YGP8|A0A504YGP8_FASGI	21	21	61.98	384	44814.8	--	--	binding	--	--
Protein disulfide-isomerase OS=Fasciola gigantica OX=46835 GN=FGIG_01161 PE=3 SV=1	F.gigantica	tr|A0A504Z0Y0|A0A504Z0Y0_FASGI	20	20	44.38	489	55181.4	--	--	--	Posttranslational modification, protein turnover, chaperones	Protein processing in endoplasmic reticulum
Alanine transaminase OS=Fasciola gigantica OX=46835 GN=FGIG_03447 PE=3 SV=1	F.gigantica	tr|A0A504YJK4|A0A504YJK4_FASGI	18	18	50.6	500	55531.7	cellular process;biological regulation;metabolic process	cellular anatomical entity	binding;catalytic activity	Amino acid transport and metabolism	2-Oxocarboxylic acid metabolism; Alanine, aspartate and glutamate metabolism; Arginine biosynthesis; Carbon metabolism; Biosynthesis of amino acids; Metabolic pathways
Actin alpha cardiac muscle 1 OS=Fasciola gigantica OX=46835 GN=FGIG_00115 PE=3 SV=1; Actin alpha cardiac muscle 1 OS=Fasciola gigantica OX=46835 GN=FGIG_07271 PE=3 SV=1	F.gigantica	tr|A0A504YKQ2|A0A504YKQ2_FASGI;tr|A0A504YJ32|A0A504YJ32_FASGI	20	2	56.65	376	41771.4	--	--	--	Cytoskeleton	Focal adhesion; Apoptosis; Tight junction; Phagosome; Adherens junction; Salmonella infection; Regulation of actin cytoskeleton
Tyrosine 3-monooxygenase/tryptophan 5-monooxygenase activation protein theta polypeptide OS=Fasciola gigantica OX=46835 GN=FGIG_07351 PE=3 SV=1	F.gigantica	tr|A0A504YX93|A0A504YX93_FASGI	18	9	75.79	252	28661.1	multicellular organismal process;biological regulation;localization;developmental process;behavior;response to stimulus;cellular process;biological adhesion;reproductive process	protein-containing complex;cellular anatomical entity	binding	--	Cell cycle; Longevity regulating pathway - worm; Oocyte meiosis
Glutathione S-transferase sigma class OS=Fasciola gigantica OX=46835 PE=2 SV=1	F.gigantica	tr|K7Z2A9|K7Z2A9_FASGI	17	17	69.19	211	24595.3	--	--	catalytic activity	--	Metabolic pathways; Glutathione metabolism; Arachidonic acid metabolism; Drug metabolism - cytochrome P450; Metabolism of xenobiotics by cytochrome P450
Glutathione transferase OS=Fasciola gigantica OX=46835 GN=FGIG_08719 PE=3 SV=1	F.gigantica	tr|A0A504YW63|A0A504YW63_FASGI	20	20	49.84	313	35968.5	--	--	--	--	Hepatocellular carcinoma; Fluid shear stress and atherosclerosis; Platinum drug resistance; Drug metabolism - cytochrome P450; Chemical carcinogenesis - reactive oxygen species; Metabolism of xenobiotics by cytochrome P450; Chemical carcinogenesis - DNA adducts; Metabolic pathways; Pathways in cancer; Glutathione metabolism; Chemical carcinogenesis - receptor activation; Drug metabolism - other e…
Uncharacterized protein OS=Fasciola gigantica OX=46835 GN=FGIG_02003 PE=4 SV=1	F.gigantica	tr|A0A504YJQ4|A0A504YJQ4_FASGI	15	15	13.21	1605	182663	--	--	--	--	--
Glutathione transferase OS=Fasciola gigantica OX=46835 GN=gst-1 PE=2 SV=1	F.gigantica	tr|Q9XYL9|Q9XYL9_FASGI	18	17	66.06	218	25337	metabolic process	cellular anatomical entity	catalytic activity	--	Drug metabolism - other enzymes; Metabolic pathways; Chemical carcinogenesis - DNA adducts; Pathways in cancer; Glutathione metabolism; Chemical carcinogenesis - receptor activation; Platinum drug resistance; Fluid shear stress and atherosclerosis; Drug metabolism - cytochrome P450; Chemical carcinogenesis - reactive oxygen species; Metabolism of xenobiotics by cytochrome P450; Hepatocellular car…
EGF-like domain-containing protein OS=Fasciola gigantica OX=46835 GN=FGIG_03998 PE=3 SV=1	F.gigantica	tr|A0A504YQK1|A0A504YQK1_FASGI	15	15	10.17	1987	221530	--	cellular anatomical entity	binding	--	--
Glyceraldehyde-3-phosphate dehydrogenase OS=Fasciola gigantica OX=46835 GN=FGIG_06798 PE=3 SV=1	F.gigantica	tr|A0A504YCL4|A0A504YCL4_FASGI	17	17	68.55	337	36542.6	cellular process;metabolic process	--	catalytic activity;binding	Carbohydrate transport and metabolism	Glycolysis / Gluconeogenesis; Carbon metabolism; Biosynthesis of amino acids; Metabolic pathways; Salmonella infection
Branched-chain-amino-acid aminotransferase OS=Fasciola gigantica OX=46835 GN=FGIG_02920 PE=3 SV=1	F.gigantica	tr|A0A504Z6I4|A0A504Z6I4_FASGI	14	14	50.65	387	43627	cellular process;localization;biological regulation;metabolic process	cellular anatomical entity	catalytic activity	Coenzyme transport and metabolism;Amino acid transport and metabolism	Biosynthesis of amino acids; Valine, leucine and isoleucine biosynthesis; Valine, leucine and isoleucine degradation; Biosynthesis of cofactors; Metabolic pathways; 2-Oxocarboxylic acid metabolism; Pantothenate and CoA biosynthesis; Cysteine and methionine metabolism
Uncharacterized protein OS=Fasciola gigantica OX=46835 GN=FGIG_08354 PE=4 SV=1	F.gigantica	tr|A0A504ZB58|A0A504ZB58_FASGI	15	15	65.35	228	26436.2	--	cellular anatomical entity	--	--	--
Spectrin beta chain OS=Fasciola gigantica OX=46835 GN=FGIG_08554 PE=3 SV=1	F.gigantica	tr|A0A504YIN4|A0A504YIN4_FASGI	14	14	7.363	2336	270020	biological regulation;cellular process;signaling	cellular anatomical entity	binding	--	--
Paramyosin OS=Fasciola gigantica OX=46835 GN=FGIG_08997 PE=3 SV=1	F.gigantica	tr|A0A504Y9W6|A0A504Y9W6_FASGI	12	12	7.293	2002	230744	reproductive process;cellular process;locomotion;response to stimulus;developmental process;localization;biological regulation;multicellular organismal process	protein-containing complex;cellular anatomical entity	catalytic activity;cytoskeletal motor activity;binding	--	--
Malate dehydrogenase OS=Fasciola gigantica OX=46835 GN=FGIG_08365 PE=3 SV=1	F.gigantica	tr|A0A504YCA6|A0A504YCA6_FASGI	15	15	63.72	328	36037.6	response to stimulus;cellular process;biological regulation;metabolic process	cellular anatomical entity	catalytic activity	Energy production and conversion	Glyoxylate and dicarboxylate metabolism; Cysteine and methionine metabolism; Citrate cycle (TCA cycle); Pyruvate metabolism; Metabolic pathways; Carbon metabolism
Triosephosphate isomerase OS=Fasciola gigantica OX=46835 GN=FGIG_01767 PE=3 SV=1	F.gigantica	tr|A0A504YTK2|A0A504YTK2_FASGI	13	13	62.06	253	27794.6	cellular process;developmental process;metabolic process;multicellular organismal process	cellular anatomical entity	binding;catalytic activity	Carbohydrate transport and metabolism	Fructose and mannose metabolism; Biosynthesis of amino acids; Carbon metabolism; Metabolic pathways; Glycolysis / Gluconeogenesis; Inositol phosphate metabolism
Thioredoxin-glutathione reductase 2 OS=Fasciola gigantica OX=46835 PE=2 SV=1; Thioredoxin-glutathione reductase 1 OS=Fasciola gigantica OX=46835 PE=2 SV=1	F.gigantica	tr|A0A0K1NZF7|A0A0K1NZF7_FASGI;tr|A0A0K1NYF8|A0A0K1NYF8_FASGI	13	3	36.31	639	70977.9	response to stimulus;metabolic process;biological regulation;cellular process	cellular anatomical entity	binding;catalytic activity;antioxidant activity	Energy production and conversion	Selenocompound metabolism
Peptidase D OS=Fasciola gigantica OX=46835 GN=FGIG_12081 PE=4 SV=1	F.gigantica	tr|A0A504XV93|A0A504XV93_FASGI	13	13	44.69	405	45328.6	cellular process;metabolic process	cellular anatomical entity	binding;catalytic activity	Amino acid transport and metabolism	--
Phosphoglycerate kinase OS=Fasciola gigantica OX=46835 GN=FGIG_04452 PE=3 SV=1	F.gigantica	tr|A0A504Z124|A0A504Z124_FASGI	13	13	40.72	415	44179.2	metabolic process;cellular process;response to stimulus;reproductive process;locomotion	cellular anatomical entity	catalytic activity;binding	Carbohydrate transport and metabolism	Biosynthesis of amino acids; Carbon metabolism; Metabolic pathways; Glycolysis / Gluconeogenesis
Importin 7 OS=Fasciola gigantica OX=46835 GN=FGIG_06236 PE=4 SV=1	F.gigantica	tr|A0A504YMY3|A0A504YMY3_FASGI	12	12	18.99	1011	114388	metabolic process;biological regulation;multicellular organismal process;cellular process;developmental process;signaling;reproductive process	protein-containing complex;cellular anatomical entity	catalytic activity;binding	--	Nucleocytoplasmic transport
Methylmalonyl-CoA mutase OS=Fasciola gigantica OX=46835 GN=FGIG_08857 PE=3 SV=1	F.gigantica	tr|A0A504YZU3|A0A504YZU3_FASGI	14	14	24.26	742	81940.9	--	--	--	--	Carbon metabolism; Propanoate metabolism; Metabolic pathways; Glyoxylate and dicarboxylate metabolism; Valine, leucine and isoleucine degradation
Translation elongation factor 2 OS=Fasciola gigantica OX=46835 GN=FGIG_00796 PE=3 SV=1	F.gigantica	tr|A0A504YZD9|A0A504YZD9_FASGI	11	11	16.47	850	94616.2	reproductive process;growth;metabolic process;multicellular organismal process;cellular process;developmental process	cellular anatomical entity	catalytic activity;binding;translation regulator activity	Translation, ribosomal structure and biogenesis	--
Fructose-bisphosphatase (Fragment) OS=Fasciola gigantica OX=46835 GN=FGIG_04759 PE=3 SV=1	F.gigantica	tr|A0A504YWE6|A0A504YWE6_FASGI	14	6	53.23	372	40482.8	metabolic process;cellular process	--	binding;catalytic activity	Carbohydrate transport and metabolism	Metabolic pathways; Carbon metabolism; Glycolysis / Gluconeogenesis; Pentose phosphate pathway; Fructose and mannose metabolism
Glutamine synthetase OS=Fasciola gigantica OX=46835 GN=FGIG_06082 PE=3 SV=1	F.gigantica	tr|A0A504YZA2|A0A504YZA2_FASGI	11	11	23.88	490	55153.2	--	--	--	Amino acid transport and metabolism	--
Peptidyl-prolyl cis-trans isomerase OS=Fasciola gigantica OX=46835 GN=FGIG_11717 PE=3 SV=1	F.gigantica	tr|A0A504YFI1|A0A504YFI1_FASGI	14	14	79.14	163	17744.2	--	--	--	Posttranslational modification, protein turnover, chaperones	--
Tetratricopeptide repeat protein 39B OS=Fasciola gigantica OX=46835 GN=FGIG_08861 PE=4 SV=1	F.gigantica	tr|A0A504Z3T9|A0A504Z3T9_FASGI	12	12	19.94	677	77736	--	--	--	--	--
Malate dehydrogenase OS=Fasciola gigantica OX=46835 GN=FGIG_05200 PE=3 SV=1	F.gigantica	tr|A0A504Z4D3|A0A504Z4D3_FASGI	11	11	40.22	363	39066.8	cellular process;metabolic process	cellular anatomical entity	binding;catalytic activity	Energy production and conversion	Metabolic pathways; Carbon metabolism; Glyoxylate and dicarboxylate metabolism; Citrate cycle (TCA cycle); Cysteine and methionine metabolism; Pyruvate metabolism
SERPIN domain-containing protein OS=Fasciola gigantica OX=46835 GN=FGIG_04537 PE=3 SV=1	F.gigantica	tr|A0A504Y562|A0A504Y562_FASGI	10	10	29.89	358	39709.2	--	--	--	Posttranslational modification, protein turnover, chaperones	--
Cathepsin L1 OS=Fasciola gigantica OX=46835 GN=ctl1 PE=2 SV=1	F.gigantica	tr|H6WYY7|H6WYY7_FASGI	11	10	32.52	326	36785.1	metabolic process	cellular anatomical entity	catalytic activity	Function unknown	Lysosome; Phagosome; Autophagy - animal
UTP--glucose-1-phosphate uridylyltransferase OS=Fasciola gigantica OX=46835 GN=FGIG_09880 PE=3 SV=1	F.gigantica	tr|A0A504Z3Q6|A0A504Z3Q6_FASGI	11	11	31.28	358	40338.4	multicellular organismal process;metabolic process;developmental process;cellular process	cellular anatomical entity	catalytic activity;binding	Coenzyme transport and metabolism;Carbohydrate transport and metabolism	Galactose metabolism; Starch and sucrose metabolism; Biosynthesis of cofactors; Metabolic pathways; Amino sugar and nucleotide sugar metabolism; Pentose and glucuronate interconversions; Biosynthesis of nucleotide sugars
Heat shock protein 4L OS=Fasciola gigantica OX=46835 GN=FGIG_10505 PE=3 SV=1	F.gigantica	tr|A0A504YYB0|A0A504YYB0_FASGI	10	9	20.99	624	70221.6	--	cellular anatomical entity	binding	Posttranslational modification, protein turnover, chaperones	Protein processing in endoplasmic reticulum
Dipeptidyl peptidase OS=Fasciola gigantica OX=46835 GN=FGIG_09152 PE=4 SV=1	F.gigantica	tr|A0A504Y6F5|A0A504Y6F5_FASGI	10	10	24.72	615	69059.9	metabolic process	cellular anatomical entity	binding;catalytic activity	--	--
Acetyl-CoA deacylase OS=Fasciola gigantica OX=46835 GN=FGIG_02713 PE=3 SV=1	F.gigantica	tr|A0A504YC54|A0A504YC54_FASGI	12	12	38.7	478	52470.7	metabolic process;cellular process	cellular anatomical entity	catalytic activity	Energy production and conversion	--
Aspartate aminotransferase OS=Fasciola gigantica OX=46835 GN=FGIG_08565 PE=3 SV=1	F.gigantica	tr|A0A504Y7H3|A0A504Y7H3_FASGI	10	10	29.65	398	44493.3	localization;cellular process;metabolic process	cellular anatomical entity	catalytic activity;binding	Amino acid transport and metabolism	2-Oxocarboxylic acid metabolism; Cysteine and methionine metabolism; Alanine, aspartate and glutamate metabolism; Phenylalanine metabolism; Arginine biosynthesis; Metabolic pathways; Tyrosine metabolism; Phenylalanine, tyrosine and tryptophan biosynthesis; Arginine and proline metabolism; Carbon metabolism; Biosynthesis of amino acids
Clathrin heavy chain OS=Fasciola gigantica OX=46835 GN=FGIG_02390 PE=3 SV=1	F.gigantica	tr|A0A504YEU6|A0A504YEU6_FASGI	10	10	7.879	1726	196045	metabolic process;biological regulation;cellular process;developmental process;immune system process;localization	cellular anatomical entity;protein-containing complex	structural molecule activity;binding	--	Lysosome; Endocytosis
Kynurenine---oxoglutarate transaminase OS=Fasciola gigantica OX=46835 GN=FGIG_10384 PE=4 SV=1	F.gigantica	tr|A0A504YVF1|A0A504YVF1_FASGI	10	10	30.16	368	40858.9	cellular process;metabolic process	--	binding;catalytic activity	Amino acid transport and metabolism	Cysteine and methionine metabolism; Selenocompound metabolism; Metabolic pathways; Tryptophan metabolism
Leukotriene A-4 hydrolase OS=Fasciola gigantica OX=46835 GN=FGIG_00782 PE=3 SV=1	F.gigantica	tr|A0A504X7M0|A0A504X7M0_FASGI	11	11	29.26	680	77608.4	response to stimulus;metabolic process;developmental process;cellular process	cellular anatomical entity	binding;catalytic activity	Amino acid transport and metabolism	Metabolic pathways; Arachidonic acid metabolism
Glutathione transferase OS=Fasciola gigantica OX=46835 GN=FGIG_05292 PE=3 SV=1	F.gigantica	tr|A0A504YYF4|A0A504YYF4_FASGI	10	10	39.14	419	47891.8	response to stimulus;cellular process;metabolic process;biological process involved in interspecies interaction between organisms	cellular anatomical entity	binding;translation regulator activity	Posttranslational modification, protein turnover, chaperones	--
Annexin OS=Fasciola gigantica OX=46835 GN=FGIG_12159 PE=3 SV=1	F.gigantica	tr|A0A504Y587|A0A504Y587_FASGI	9	9	42.59	263	29408.4	--	--	--	--	--
Ezrin-moesin-radixin OS=Fasciola gigantica OX=46835 GN=FGIG_06080 PE=4 SV=1	F.gigantica	tr|A0A504ZA08|A0A504ZA08_FASGI	10	10	24.37	558	65737.2	response to stimulus;multicellular organismal process;biological regulation;localization;developmental process;cellular process	protein-containing complex;cellular anatomical entity	binding;structural molecule activity	--	--
Staphylococcal nuclease domain-containing protein OS=Fasciola gigantica OX=46835 GN=FGIG_08996 PE=4 SV=1	F.gigantica	tr|A0A504ZAB4|A0A504ZAB4_FASGI	9	9	11.92	1040	115401	metabolic process;biological regulation;cellular process;developmental process	cellular anatomical entity	binding;transcription regulator activity	--	--
Filamin-A OS=Fasciola gigantica OX=46835 GN=FGIG_10911 PE=3 SV=1	F.gigantica	tr|A0A504YKH3|A0A504YKH3_FASGI	9	9	8.079	1374	150062	biological regulation;developmental process;cellular process;localization;biological adhesion	cellular anatomical entity;protein-containing complex	binding	--	--
Alpha-aminoadipic semialdehyde synthase mitochondrial OS=Fasciola gigantica OX=46835 GN=FGIG_10732 PE=4 SV=1	F.gigantica	tr|A0A504Z3L9|A0A504Z3L9_FASGI	9	9	55.69	246	27863.8	cellular process;metabolic process	cellular anatomical entity	catalytic activity	Amino acid transport and metabolism	Lysine degradation; Metabolic pathways
Fructose-bisphosphate aldolase (Fragment) OS=Fasciola gigantica OX=46835 GN=FGIG_12193 PE=3 SV=1	F.gigantica	tr|A0A504ZAW9|A0A504ZAW9_FASGI	10	10	61.72	128	14183.3	metabolic process;cellular process	--	catalytic activity	Carbohydrate transport and metabolism	Biosynthesis of amino acids; Carbon metabolism; Metabolic pathways; Glycolysis / Gluconeogenesis; Pentose phosphate pathway; Fructose and mannose metabolism
Calponin OS=Fasciola gigantica OX=46835 GN=FGIG_01172 PE=3 SV=1	F.gigantica	tr|A0A504YK51|A0A504YK51_FASGI	10	10	31.3	361	39853	cellular process	--	binding	--	--
Gill-specific calpain OS=Fasciola gigantica OX=46835 GN=FGIG_01291 PE=3 SV=1	F.gigantica	tr|A0A504YWV2|A0A504YWV2_FASGI	10	10	16.62	722	83500.7	--	--	catalytic activity;binding	Defense mechanisms	--
14-3-3 protein OS=Fasciola gigantica OX=46835 PE=2 SV=1	F.gigantica	tr|Q5FX78|Q5FX78_FASGI	20	11	72.62	252	28741.4	response to stimulus;biological adhesion;biological regulation;cellular process;localization	cellular anatomical entity;protein-containing complex	binding;catalytic activity	--	Hepatitis C; Hippo signaling pathway; PI3K-Akt signaling pathway; Viral carcinogenesis; Hepatitis B; Cell cycle; Oocyte meiosis
Tubulin beta chain OS=Fasciola gigantica OX=46835 GN=FGIG_02819 PE=3 SV=1	F.gigantica	tr|A0A504YSW8|A0A504YSW8_FASGI	9	3	23.08	442	49787.9	response to stimulus;cellular process;immune system process;biological process involved in interspecies interaction between organisms	cellular anatomical entity;protein-containing complex	structural molecule activity;binding;catalytic activity	--	Salmonella infection; Phagosome; Gap junction
Ferritin OS=Fasciola gigantica OX=46835 GN=FGIG_03790 PE=3 SV=1	F.gigantica	tr|A0A504YQY7|A0A504YQY7_FASGI	9	9	34.76	210	24370.1	--	--	--	--	--
Spectrin alpha chain non-erythrocytic OS=Fasciola gigantica OX=46835 GN=FGIG_09949 PE=3 SV=1	F.gigantica	tr|A0A504Y9H5|A0A504Y9H5_FASGI	9	9	3.8	2421	281504	cellular process;developmental process;localization;signaling;biological regulation;reproductive process	cellular anatomical entity;protein-containing complex	binding;structural molecule activity;molecular function regulator	--	--
Rab GDP dissociation inhibitor beta OS=Fasciola gigantica OX=46835 GN=FGIG_11560 PE=3 SV=1	F.gigantica	tr|A0A504YD60|A0A504YD60_FASGI	8	5	25.16	306	35233.5	--	--	--	--	--
ATP binding cassette subfamily B MDR TAP OS=Fasciola gigantica OX=46835 GN=FGIG_05048 PE=4 SV=1	F.gigantica	tr|A0A504YNZ1|A0A504YNZ1_FASGI	7	7	6.984	1260	139481	--	--	--	--	ABC transporters
Tyrosine 3-monooxygenase/tryptophan 5-monooxygenase activation protein theta polypeptide OS=Fasciola gigantica OX=46835 GN=FGIG_05814 PE=3 SV=1	F.gigantica	tr|A0A504YKJ3|A0A504YKJ3_FASGI	11	9	49.79	243	27494.8	--	--	--	--	Hippo signaling pathway - fly
Phosphoglucomutase OS=Fasciola gigantica OX=46835 GN=FGIG_00594 PE=3 SV=1	F.gigantica	tr|A0A504Z3Z6|A0A504Z3Z6_FASGI	8	8	16.33	600	68129.9	metabolic process;cellular process	cellular anatomical entity	catalytic activity;binding	Carbohydrate transport and metabolism	Purine metabolism; Biosynthesis of nucleotide sugars; Galactose metabolism; Glycolysis / Gluconeogenesis; Metabolic pathways; Amino sugar and nucleotide sugar metabolism; Pentose phosphate pathway; Starch and sucrose metabolism
Serine/threonine-protein phosphatase OS=Fasciola gigantica OX=46835 GN=FGIG_01822 PE=3 SV=1	F.gigantica	tr|A0A504YI98|A0A504YI98_FASGI	7	7	33.02	318	36368.8	metabolic process;biological regulation;cellular process;developmental process;reproductive process;response to stimulus	cellular anatomical entity;protein-containing complex	binding;catalytic activity	--	mRNA surveillance pathway; Autophagy - animal; Autophagy - other; TGF-beta signaling pathway
Heat shock 70 kDa protein 4 OS=Fasciola gigantica OX=46835 GN=FGIG_04814 PE=3 SV=1	F.gigantica	tr|A0A504YBY0|A0A504YBY0_FASGI	9	8	15.42	778	87732.1	developmental process;biological regulation;response to stimulus	cellular anatomical entity	binding	Posttranslational modification, protein turnover, chaperones	--
14-3-3 protein zeta/delta OS=Fasciola gigantica OX=46835 GN=FGIG_12079 PE=3 SV=1	F.gigantica	tr|A0A504YNS3|A0A504YNS3_FASGI	8	7	79.13	115	13194.5	--	--	binding;catalytic activity	--	--
Glycogen debranching enzyme OS=Fasciola gigantica OX=46835 GN=FGIG_06646 PE=4 SV=1	F.gigantica	tr|A0A504YUV6|A0A504YUV6_FASGI	8	8	8.283	1654	186198	--	--	--	Carbohydrate transport and metabolism	Starch and sucrose metabolism; Metabolic pathways
Filamin-A OS=Fasciola gigantica OX=46835 GN=FGIG_01162 PE=3 SV=1	F.gigantica	tr|A0A504ZB76|A0A504ZB76_FASGI	7	7	3.213	2490	269334	--	--	--	--	--
Myoferlin OS=Fasciola gigantica OX=46835 GN=FGIG_11155 PE=4 SV=1	F.gigantica	tr|A0A504ZB63|A0A504ZB63_FASGI	8	8	15.72	687	79044.1	--	cellular anatomical entity	--	--	--
Phosphoglucomutase (alpha-D-glucose-1,6-bisphosphate-dependent) OS=Fasciola gigantica OX=46835 GN=FGIG_07540 PE=3 SV=1	F.gigantica	tr|A0A504Z4F7|A0A504Z4F7_FASGI	6	6	15.89	579	63666	metabolic process;cellular process	cellular anatomical entity	binding;catalytic activity	Carbohydrate transport and metabolism	Glycolysis / Gluconeogenesis; Galactose metabolism; Metabolic pathways; Purine metabolism; Biosynthesis of nucleotide sugars; Starch and sucrose metabolism; Amino sugar and nucleotide sugar metabolism; Pentose phosphate pathway
Myoglobin OS=Fasciola gigantica OX=46835 GN=FGIG_07874 PE=4 SV=1	F.gigantica	tr|A0A504YI87|A0A504YI87_FASGI	7	5	52	125	14368.6	--	--	--	--	--
Uncharacterized protein (Fragment) OS=Fasciola gigantica OX=46835 GN=FGIG_02021 PE=4 SV=1	F.gigantica	tr|A0A504Z3S9|A0A504Z3S9_FASGI	7	7	15.7	726	78466.1	cellular process	--	--	--	--
Aminomethyltransferase OS=Fasciola gigantica OX=46835 GN=FGIG_10625 PE=3 SV=1	F.gigantica	tr|A0A504YTK5|A0A504YTK5_FASGI	7	7	27.59	424	46816.3	cellular process;metabolic process	cellular anatomical entity	catalytic activity	Amino acid transport and metabolism	One carbon pool by folate; Glyoxylate and dicarboxylate metabolism; Metabolic pathways; Carbon metabolism; Glycine, serine and threonine metabolism
Adenylyl cyclase-associated protein OS=Fasciola gigantica OX=46835 GN=FGIG_10041 PE=3 SV=1	F.gigantica	tr|A0A504YCH2|A0A504YCH2_FASGI	7	7	21.71	479	52879	biological regulation;multicellular organismal process;developmental process;cellular process;locomotion	cellular anatomical entity	binding;catalytic activity	--	--
Myoglobin 1 OS=Fasciola gigantica OX=46835 GN=FGIG_04909 PE=3 SV=1	F.gigantica	tr|A0A504YY71|A0A504YY71_FASGI	7	7	43.62	149	16656.1	--	--	binding	--	--
Ferritin OS=Fasciola gigantica OX=46835 GN=FGIG_03789 PE=3 SV=1	F.gigantica	tr|A0A504YX11|A0A504YX11_FASGI	7	7	41.15	226	26082.8	biological regulation;cellular process	--	binding;catalytic activity	--	Necroptosis; Mineral absorption; Ferroptosis
Ubiquitin protein ligase BRE1 OS=Fasciola gigantica OX=46835 GN=FGIG_01778 PE=4 SV=1	F.gigantica	tr|A0A504YUN9|A0A504YUN9_FASGI	7	7	10.2	902	100587	--	--	--	Cell cycle control, cell division, chromosome partitioning	--
T-complex protein 1 subunit eta OS=Fasciola gigantica OX=46835 GN=FGIG_07642 PE=3 SV=1	F.gigantica	tr|A0A504ZBK0|A0A504ZBK0_FASGI	7	7	17.8	545	59677.3	reproductive process;localization;cellular process;biological regulation	cellular anatomical entity;protein-containing complex	binding;protein folding chaperone	Posttranslational modification, protein turnover, chaperones	--
Phosphoglycerate mutase OS=Fasciola gigantica OX=46835 GN=FGIG_08259 PE=3 SV=1	F.gigantica	tr|A0A504YRA6|A0A504YRA6_FASGI	7	7	49.8	251	28213.3	--	--	--	Carbohydrate transport and metabolism	Metabolic pathways; Carbon metabolism; Glycine, serine and threonine metabolism; Biosynthesis of amino acids; Glycolysis / Gluconeogenesis
Aspartate aminotransferase OS=Fasciola gigantica OX=46835 GN=FGIG_04765 PE=3 SV=1	F.gigantica	tr|A0A504YL02|A0A504YL02_FASGI	7	7	22.91	406	45473.2	response to stimulus;cellular process;metabolic process;biological regulation	cellular anatomical entity	catalytic activity;binding	Amino acid transport and metabolism	Arginine and proline metabolism; Carbon metabolism; Biosynthesis of amino acids; Tyrosine metabolism; Phenylalanine, tyrosine and tryptophan biosynthesis; Phenylalanine metabolism; Arginine biosynthesis; Metabolic pathways; 2-Oxocarboxylic acid metabolism; Cysteine and methionine metabolism; Alanine, aspartate and glutamate metabolism
ADP/ATP translocase OS=Fasciola gigantica OX=46835 GN=FGIG_09083 PE=3 SV=1	F.gigantica	tr|A0A504YFL1|A0A504YFL1_FASGI	7	7	21.22	311	34093.5	cellular process;localization;metabolic process	cellular anatomical entity	transporter activity;structural molecule activity	--	Cellular senescence; Calcium signaling pathway; Necroptosis
Uncharacterized protein OS=Fasciola gigantica OX=46835 GN=FGIG_04800 PE=4 SV=1	F.gigantica	tr|A0A504YVL5|A0A504YVL5_FASGI	7	7	40.64	219	24733.7	--	--	--	--	--
Succinate dehydrogenase [ubiquinone] flavoprotein subunit, mitochondrial OS=Fasciola gigantica OX=46835 GN=FGIG_08388 PE=3 SV=1	F.gigantica	tr|A0A504Y4X4|A0A504Y4X4_FASGI	7	7	14.59	651	71477.4	localization;developmental process;cellular process;metabolic process	cellular anatomical entity;protein-containing complex	catalytic activity;binding	Energy production and conversion	Citrate cycle (TCA cycle); Oxidative phosphorylation; Metabolic pathways; Carbon metabolism
Dysferlin (Fragment) OS=Fasciola gigantica OX=46835 GN=FGIG_10412 PE=4 SV=1	F.gigantica	tr|A0A504Z0Y5|A0A504Z0Y5_FASGI	6	6	12.82	655	72987.9	--	--	--	--	--
Dynein light chain OS=Fasciola gigantica OX=46835 GN=FGIG_10861 PE=3 SV=1	F.gigantica	tr|A0A504YNX9|A0A504YNX9_FASGI	7	5	69.66	89	10286.6	localization;viral process;developmental process;biological regulation;metabolic process;reproductive process;immune system process;cellular process	cellular anatomical entity;protein-containing complex	molecular function regulator;cytoskeletal motor activity;binding	--	--
Fructose-bisphosphate aldolase OS=Fasciola gigantica OX=46835 GN=FGIG_12192 PE=3 SV=1	F.gigantica	tr|A0A504Z4Y4|A0A504Z4Y4_FASGI	6	6	36.32	201	21259.3	--	--	--	Carbohydrate transport and metabolism	Carbon metabolism; Biosynthesis of amino acids; Metabolic pathways; Glycolysis / Gluconeogenesis; Pentose phosphate pathway; Fructose and mannose metabolism
Adenosylhomocysteinase OS=Fasciola gigantica OX=46835 GN=FGIG_02481 PE=3 SV=1	F.gigantica	tr|A0A504YY90|A0A504YY90_FASGI	8	6	23.61	432	48021.7	cellular process;metabolic process	cellular anatomical entity	binding;catalytic activity	Coenzyme transport and metabolism	Metabolic pathways; Cysteine and methionine metabolism
Serine/threonine protein phosphatase 2A regulatory subunit OS=Fasciola gigantica OX=46835 GN=FGIG_06791 PE=3 SV=1	F.gigantica	tr|A0A504YXZ1|A0A504YXZ1_FASGI	7	7	19.25	478	55791.2	biological regulation;cellular process	cellular anatomical entity;protein-containing complex	binding;molecular function regulator	--	mRNA surveillance pathway
Transgelin OS=Fasciola gigantica OX=46835 GN=FGIG_02273 PE=3 SV=1	F.gigantica	tr|A0A504YCY9|A0A504YCY9_FASGI	8	8	36.41	217	24210.6	--	--	binding	--	--
EGF-like domain-containing protein OS=Fasciola gigantica OX=46835 GN=FGIG_00114 PE=4 SV=1	F.gigantica	tr|A0A504YKJ0|A0A504YKJ0_FASGI	8	8	4.79	1837	209742	--	--	--	--	--
Retinaldehyde binding protein OS=Fasciola gigantica OX=46835 GN=FGIG_07780 PE=4 SV=1	F.gigantica	tr|A0A504YX94|A0A504YX94_FASGI	6	6	25.27	364	41760.4	--	--	--	--	--
Putative vacuolar protein sorting 26 vps26 OS=Fasciola gigantica OX=46835 GN=FGIG_01566 PE=4 SV=1	F.gigantica	tr|A0A504YQE4|A0A504YQE4_FASGI	6	6	13.97	551	60734	--	--	--	Function unknown	--
Protein disulfide-isomerase OS=Fasciola gigantica OX=46835 GN=FGIG_07376 PE=3 SV=1	F.gigantica	tr|A0A504YYD5|A0A504YYD5_FASGI	6	6	14.88	484	54811.9	cellular process	--	--	Posttranslational modification, protein turnover, chaperones	Protein processing in endoplasmic reticulum
Mediator of cell motility 1 OS=Fasciola gigantica OX=46835 GN=FGIG_08835 PE=3 SV=1	F.gigantica	tr|A0A504YL84|A0A504YL84_FASGI	6	6	35.47	296	33357.3	biological regulation	cellular anatomical entity	binding	--	--
Glycine hydroxymethyltransferase (Fragment) OS=Fasciola gigantica OX=46835 GN=FGIG_08269 PE=3 SV=1	F.gigantica	tr|A0A504YE73|A0A504YE73_FASGI	6	6	19.49	354	38628.7	response to stimulus;metabolic process;cellular process	cellular anatomical entity;protein-containing complex	catalytic activity;binding	Amino acid transport and metabolism	Metabolic pathways; Biosynthesis of cofactors; Glycine, serine and threonine metabolism; Biosynthesis of amino acids; Carbon metabolism; One carbon pool by folate; Glyoxylate and dicarboxylate metabolism
Inorganic diphosphatase OS=Fasciola gigantica OX=46835 GN=FGIG_04581 PE=3 SV=1	F.gigantica	tr|A0A504YH45|A0A504YH45_FASGI	7	7	32.3	291	32666.9	cellular process;metabolic process	cellular anatomical entity	catalytic activity	Energy production and conversion	--
Ferritin OS=Fasciola gigantica OX=46835 GN=FGIG_03791 PE=3 SV=1	F.gigantica	tr|A0A504YTH3|A0A504YTH3_FASGI	6	6	41.74	218	25133.6	--	--	binding	--	Ferroptosis; Mineral absorption; Necroptosis
Glutathione transferase OS=Fasciola gigantica OX=46835 PE=2 SV=1	F.gigantica	tr|K7YEX8|K7YEX8_FASGI	8	8	37.5	240	27473.5	metabolic process;cellular process	--	catalytic activity	Posttranslational modification, protein turnover, chaperones	--
Uncharacterized protein OS=Fasciola gigantica OX=46835 GN=FGIG_12601 PE=4 SV=1	F.gigantica	tr|A0A504YPA7|A0A504YPA7_FASGI	6	6	14.12	616	71024.9	--	--	--	--	--
Nardilysin OS=Fasciola gigantica OX=46835 GN=FGIG_05052 PE=4 SV=1	F.gigantica	tr|A0A504YB95|A0A504YB95_FASGI	6	6	6.099	1033	117177	metabolic process	--	catalytic activity	Posttranslational modification, protein turnover, chaperones	--
Putative Ankyrin repeat-containing OS=Fasciola gigantica OX=46835 GN=FGIG_02952 PE=4 SV=1	F.gigantica	tr|A0A504YRM7|A0A504YRM7_FASGI	5	5	8.989	712	77094.6	--	--	--	--	mRNA surveillance pathway; Hippo signaling pathway - fly; TGF-beta signaling pathway
GST C-terminal domain-containing protein OS=Fasciola gigantica OX=46835 GN=FGIG_08402 PE=4 SV=1	F.gigantica	tr|A0A504YWR3|A0A504YWR3_FASGI	6	6	48.17	164	18667.1	--	--	--	--	--
Mastin OS=Fasciola gigantica OX=46835 GN=FGIG_00425 PE=4 SV=1	F.gigantica	tr|A0A504YAC3|A0A504YAC3_FASGI	5	5	16.6	500	56087.5	metabolic process	cellular anatomical entity	catalytic activity	Posttranslational modification, protein turnover, chaperones;Cell wall/membrane/envelope biogenesis	--
Transitional endoplasmic reticulum ATPase TER94 OS=Fasciola gigantica OX=46835 GN=FGIG_11990 PE=3 SV=1	F.gigantica	tr|A0A504YJX6|A0A504YJX6_FASGI	5	5	13.93	481	53162.1	cellular process;response to stimulus;localization;developmental process;behavior;viral process;multicellular organismal process;biological regulation;metabolic process	protein-containing complex;cellular anatomical entity	molecular function regulator;binding;catalytic activity	Cell cycle control, cell division, chromosome partitioning;Signal transduction mechanisms;Cell wall/membrane/envelope biogenesis	Protein processing in endoplasmic reticulum
Tubulin alpha chain OS=Fasciola gigantica OX=46835 GN=FGIG_12230 PE=3 SV=1	F.gigantica	tr|A0A504YVW1|A0A504YVW1_FASGI	6	5	21.45	387	43192	cellular process	cellular anatomical entity	catalytic activity;binding;structural molecule activity	--	Apoptosis; Salmonella infection; Gap junction; Tight junction; Phagosome
RNA helicase OS=Fasciola gigantica OX=46835 GN=FGIG_02516 PE=3 SV=1	F.gigantica	tr|A0A504YKU1|A0A504YKU1_FASGI	5	5	15.13	390	44118.1	response to stimulus;locomotion;localization;developmental process;multicellular organismal process;biological regulation;metabolic process;growth;reproductive process;cellular process	cellular anatomical entity;protein-containing complex	catalytic activity;ATP-dependent activity;binding;translation regulator activity	Replication, recombination and repair	--
BAR domain-containing protein OS=Fasciola gigantica OX=46835 GN=FGIG_03778 PE=4 SV=1	F.gigantica	tr|A0A504YSN0|A0A504YSN0_FASGI	5	5	33.02	212	24428.7	--	--	--	--	Autophagy - animal; Endocytosis
Importin subunit beta OS=Fasciola gigantica OX=46835 GN=FGIG_03686 PE=4 SV=1	F.gigantica	tr|A0A504Z8R2|A0A504Z8R2_FASGI	6	6	11.02	926	100897	cellular process;viral process;localization;biological regulation;metabolic process;biological process involved in interspecies interaction between organisms;multi-organism process	cellular anatomical entity;protein-containing complex	binding	--	Nucleocytoplasmic transport
Retinaldehyde dehydrogenase type 2 OS=Fasciola gigantica OX=46835 GN=FGIG_01497 PE=3 SV=1	F.gigantica	tr|A0A504YF29|A0A504YF29_FASGI	6	6	16.57	495	53275.9	--	--	catalytic activity	Lipid transport and metabolism	--
Regulator of microtubule dynamics protein 1 OS=Fasciola gigantica OX=46835 GN=FGIG_11865 PE=4 SV=1	F.gigantica	tr|A0A504YZZ9|A0A504YZZ9_FASGI	5	5	40.82	196	22689.8	--	cellular anatomical entity	--	--	--
Leucine aminopeptidase OS=Fasciola gigantica OX=46835 GN=FGIG_00410 PE=3 SV=1	F.gigantica	tr|A0A504YWR8|A0A504YWR8_FASGI	5	5	24.37	238	26002.3	metabolic process	cellular anatomical entity	catalytic activity;binding	Amino acid transport and metabolism	Metabolic pathways; Glutathione metabolism
ATP-binding cassette sub-family D member 4 OS=Fasciola gigantica OX=46835 GN=FGIG_07870 PE=4 SV=1	F.gigantica	tr|A0A504YAS3|A0A504YAS3_FASGI	6	6	11.37	677	76066.7	--	cellular anatomical entity	--	General function prediction only	Peroxisome; ABC transporters
Karyopherin (Importin) beta 3 OS=Fasciola gigantica OX=46835 GN=FGIG_01937 PE=4 SV=1	F.gigantica	tr|A0A504YZP6|A0A504YZP6_FASGI	5	5	6.189	1131	125543	biological regulation;cellular process;localization;response to stimulus	protein-containing complex;cellular anatomical entity	binding;molecular function regulator	--	Nucleocytoplasmic transport
cAMP-dependent protein kinase catalytic subunit alpha OS=Fasciola gigantica OX=46835 GN=FGIG_06125 PE=3 SV=1	F.gigantica	tr|A0A504YN48|A0A504YN48_FASGI	5	5	21.5	321	37344	reproductive process;immune system process;cellular process;response to stimulus;developmental process;biological regulation;metabolic process;multicellular organismal process	cellular anatomical entity;protein-containing complex	catalytic activity;binding	Posttranslational modification, protein turnover, chaperones;Cell wall/membrane/envelope biogenesis;Signal transduction mechanisms	Autophagy - animal; Wnt signaling pathway
Glucose-6-phosphate 1-dehydrogenase OS=Fasciola gigantica OX=46835 GN=FGIG_08112 PE=4 SV=1	F.gigantica	tr|A0A504Y6U9|A0A504Y6U9_FASGI	6	6	20.38	314	36262.4	cellular process;developmental process;biological regulation;metabolic process;multicellular organismal process;response to stimulus	cellular anatomical entity	binding;catalytic activity	Carbohydrate transport and metabolism	Pentose phosphate pathway; Metabolic pathways; Carbon metabolism; Glutathione metabolism
SERPIN domain-containing protein OS=Fasciola gigantica OX=46835 GN=FGIG_08940 PE=3 SV=1	F.gigantica	tr|A0A504X338|A0A504X338_FASGI	8	8	37.02	235	26024.8	--	--	molecular function regulator	Posttranslational modification, protein turnover, chaperones	--
Heat shock protein cognate 5 OS=Fasciola gigantica OX=46835 GN=FGIG_06752 PE=3 SV=1	F.gigantica	tr|A0A504YC27|A0A504YC27_FASGI	5	4	11.15	574	61672.9	--	--	--	Posttranslational modification, protein turnover, chaperones	RNA degradation
Calpain OS=Fasciola gigantica OX=46835 GN=FGIG_10864 PE=3 SV=1	F.gigantica	tr|A0A504YK94|A0A504YK94_FASGI	6	6	26.06	165	18525.2	reproductive process;locomotion;metabolic process;multicellular organismal process;developmental process;cellular process	cellular anatomical entity	binding;catalytic activity	--	--
Fructose-bisphosphate aldolase OS=Fasciola gigantica OX=46835 GN=FGIG_07052 PE=3 SV=1	F.gigantica	tr|A0A504YE45|A0A504YE45_FASGI	11	11	28.34	441	48393.1	cellular process;metabolic process	--	catalytic activity	Carbohydrate transport and metabolism	Pentose phosphate pathway; Fructose and mannose metabolism; Metabolic pathways; Carbon metabolism; Biosynthesis of amino acids; Glycolysis / Gluconeogenesis
ADP-ribosylation factor OS=Fasciola gigantica OX=46835 GN=FGIG_08587 PE=3 SV=1	F.gigantica	tr|A0A504Y7N1|A0A504Y7N1_FASGI	4	2	30.94	181	20603.6	locomotion;developmental process;behavior;localization;metabolic process;biological regulation;multicellular organismal process;cellular process	cellular anatomical entity	binding;catalytic activity	Intracellular trafficking, secretion, and vesicular transport;General function prediction only	Endocytosis
Ornithine aminotransferase mitochondrial OS=Fasciola gigantica OX=46835 GN=FGIG_06613 PE=3 SV=1	F.gigantica	tr|A0A504Z3T4|A0A504Z3T4_FASGI	5	5	18.1	326	37115.2	cellular process;metabolic process	cellular anatomical entity	binding;catalytic activity	Amino acid transport and metabolism	Metabolic pathways; Arginine and proline metabolism
Myophilin OS=Fasciola gigantica OX=46835 GN=FGIG_12455 PE=4 SV=1	F.gigantica	tr|A0A504YDV3|A0A504YDV3_FASGI	5	5	45.96	161	17935.7	--	--	--	--	--
Serpin OS=Fasciola gigantica OX=46835 GN=FGIG_01892 PE=3 SV=1	F.gigantica	tr|A0A504YJ47|A0A504YJ47_FASGI	4	4	12.5	408	46555.6	--	--	--	Posttranslational modification, protein turnover, chaperones	--
Carbonyl reductase (NADPH) OS=Fasciola gigantica OX=46835 GN=FGIG_01635 PE=4 SV=1	F.gigantica	tr|A0A504YXL4|A0A504YXL4_FASGI	4	4	21.55	283	31372.6	--	--	--	Lipid transport and metabolism;General function prediction only	Folate biosynthesis; Metabolic pathways; Arachidonic acid metabolism; Metabolism of xenobiotics by cytochrome P450
Transaldolase OS=Fasciola gigantica OX=46835 GN=FGIG_05452 PE=3 SV=1	F.gigantica	tr|A0A504YML1|A0A504YML1_FASGI	4	4	18.86	281	31342.7	--	--	--	Carbohydrate transport and metabolism	Biosynthesis of amino acids; Carbon metabolism; Metabolic pathways; Pentose phosphate pathway
Anoctamin OS=Fasciola gigantica OX=46835 GN=FGIG_09056 PE=3 SV=1	F.gigantica	tr|A0A504YWW1|A0A504YWW1_FASGI	4	4	5.269	835	95803.1	response to stimulus;localization;cellular process;biological regulation	cellular anatomical entity	transporter activity	--	--
Loss of heterozygosity 11 chromosomal region 2 protein OS=Fasciola gigantica OX=46835 GN=FGIG_05409 PE=4 SV=1	F.gigantica	tr|A0A504WSX7|A0A504WSX7_FASGI	5	5	7.083	833	91587.1	--	--	--	Signal transduction mechanisms;General function prediction only;Function unknown;Coenzyme transport and metabolism	--
Calpain-2 catalytic subunit OS=Fasciola gigantica OX=46835 GN=FGIG_01894 PE=3 SV=1	F.gigantica	tr|A0A504YRD0|A0A504YRD0_FASGI	5	5	9.669	755	85934	--	--	--	--	--
Dynein light chain OS=Fasciola gigantica OX=46835 GN=FGIG_07349 PE=3 SV=1	F.gigantica	tr|A0A504YPY2|A0A504YPY2_FASGI	6	4	55.06	89	10428.8	multicellular organismal process;biological regulation;metabolic process;localization;developmental process;immune system process;cellular process;reproductive process	protein-containing complex;cellular anatomical entity	cytoskeletal motor activity;binding;catalytic activity	--	Salmonella infection
Actin alpha skeletal muscle protein OS=Fasciola gigantica OX=46835 GN=FGIG_12390 PE=4 SV=1	F.gigantica	tr|A0A504YPI2|A0A504YPI2_FASGI	12	6	89.25	93	10447.2	--	--	--	Cytoskeleton	--
CUB domain-containing protein OS=Fasciola gigantica OX=46835 GN=FGIG_03242 PE=4 SV=1	F.gigantica	tr|A0A504YTP0|A0A504YTP0_FASGI	4	4	27.12	177	19320	--	--	--	--	--
Uncharacterized protein OS=Fasciola gigantica OX=46835 GN=FGIG_05766 PE=4 SV=1	F.gigantica	tr|A0A504YNV9|A0A504YNV9_FASGI	5	5	15.61	487	53801	--	--	--	--	--
Heat shock protein mitochondrial OS=Fasciola gigantica OX=46835 GN=FGIG_07547 PE=3 SV=1	F.gigantica	tr|A0A504YM04|A0A504YM04_FASGI	4	4	9.756	574	61094.9	response to stimulus;multicellular organismal process;biological regulation;metabolic process;immune system process;cellular process	cellular anatomical entity;protein-containing complex	binding	Posttranslational modification, protein turnover, chaperones	RNA degradation
Threonine ammonia-lyase OS=Fasciola gigantica OX=46835 GN=FGIG_07415 PE=4 SV=1	F.gigantica	tr|A0A504YJT7|A0A504YJT7_FASGI	4	4	14.51	455	48780.3	metabolic process;cellular process	cellular anatomical entity	catalytic activity;binding	Amino acid transport and metabolism;General function prediction only	Metabolic pathways; Glycine, serine and threonine metabolism; Biosynthesis of amino acids; Carbon metabolism; Valine, leucine and isoleucine biosynthesis
Polyubiquitin-B OS=Fasciola gigantica OX=46835 GN=FGIG_03366 PE=4 SV=1; Polyubiquitin OS=Fasciola gigantica OX=46835 GN=FGIG_08506 PE=4 SV=1	F.gigantica	tr|A0A504YU10|A0A504YU10_FASGI;tr|A0A504YHV3|A0A504YHV3_FASGI	4	4	38.66	119	13227.8	multicellular organismal process;metabolic process;biological regulation;localization;developmental process;viral process;response to stimulus;multi-organism process;cellular process;immune system process;reproductive process	cellular anatomical entity	binding	Posttranslational modification, protein turnover, chaperones	Parkinson disease; Ubiquitin mediated proteolysis; Mitophagy - animal; Pathways of neurodegeneration - multiple diseases; Kaposi sarcoma-associated herpesvirus infection
RNA 3'-terminal phosphate cyclase OS=Fasciola gigantica OX=46835 GN=FGIG_03848 PE=3 SV=1	F.gigantica	tr|A0A504YWS3|A0A504YWS3_FASGI	4	4	14.6	363	38966.8	--	cellular anatomical entity	catalytic activity;binding	RNA processing and modification	--
Calponin-homology (CH) domain-containing protein OS=Fasciola gigantica OX=46835 GN=FGIG_00874 PE=4 SV=1	F.gigantica	tr|A0A504Z9F5|A0A504Z9F5_FASGI	4	4	49.01	151	16978.6	--	--	--	--	--
Translation elongation factor 1-alpha OS=Fasciola gigantica OX=46835 GN=FGIG_10368 PE=4 SV=1	F.gigantica	tr|A0A504XH41|A0A504XH41_FASGI	4	4	16.67	246	27649.7	metabolic process;cellular process	cellular anatomical entity	catalytic activity;binding;translation regulator activity	Translation, ribosomal structure and biogenesis	Nucleocytoplasmic transport
Vitellogenin domain-containing protein OS=Fasciola gigantica OX=46835 GN=FGIG_02001 PE=4 SV=1	F.gigantica	tr|A0A504YJU5|A0A504YJU5_FASGI	5	5	6.398	1141	128598	localization	--	--	--	--
Heat shock protein kDa OS=Fasciola gigantica OX=46835 GN=FGIG_09654 PE=3 SV=1	F.gigantica	tr|A0A504Z3L5|A0A504Z3L5_FASGI	3	3	5.663	618	69845.6	--	--	--	Posttranslational modification, protein turnover, chaperones	Spliceosome; Endocytosis; Longevity regulating pathway - multiple species; Protein processing in endoplasmic reticulum
EF-hand domain-containing protein OS=Fasciola gigantica OX=46835 GN=FGIG_10866 PE=4 SV=1	F.gigantica	tr|A0A504YSF4|A0A504YSF4_FASGI	4	4	43.62	94	10928.2	--	--	catalytic activity;binding	--	--
Uncharacterized protein OS=Fasciola gigantica OX=46835 GN=FGIG_07142 PE=3 SV=1	F.gigantica	tr|A0A504Z1G4|A0A504Z1G4_FASGI	4	4	33.08	130	13939.6	--	--	--	--	--
Putative phosphatase 1 regulatory subunit OS=Fasciola gigantica OX=46835 GN=FGIG_04523 PE=4 SV=1	F.gigantica	tr|A0A504YEE5|A0A504YEE5_FASGI	4	4	28.18	181	21063.1	biological regulation;cellular process	cellular anatomical entity	binding	--	--
Sodium-coupled neutral amino acid transporter 9 OS=Fasciola gigantica OX=46835 GN=FGIG_01336 PE=4 SV=1	F.gigantica	tr|A0A504YQR0|A0A504YQR0_FASGI	4	4	11.37	642	70524.8	response to stimulus;cellular process;localization	cellular anatomical entity	--	--	mTOR signaling pathway
Golgi-associated plant pathogenesis protein 1 OS=Fasciola gigantica OX=46835 GN=FGIG_10604 PE=4 SV=1	F.gigantica	tr|A0A504Z204|A0A504Z204_FASGI	4	4	14.32	405	43858.4	--	--	--	General function prediction only;Cell cycle control, cell division, chromosome partitioning	--
Alanine transaminase OS=Fasciola gigantica OX=46835 GN=FGIG_05611 PE=3 SV=1	F.gigantica	tr|A0A504Y8X6|A0A504Y8X6_FASGI	5	5	19.57	414	46163.4	metabolic process;cellular process	cellular anatomical entity	catalytic activity	Amino acid transport and metabolism	2-Oxocarboxylic acid metabolism; Alanine, aspartate and glutamate metabolism; Carbon metabolism; Arginine biosynthesis; Biosynthesis of amino acids; Metabolic pathways
S-(hydroxymethyl)glutathione dehydrogenase OS=Fasciola gigantica OX=46835 GN=FGIG_00370 PE=3 SV=1	F.gigantica	tr|A0A504ZAD8|A0A504ZAD8_FASGI	4	4	12.2	377	40446.2	multicellular organismal process;biological regulation;metabolic process;cellular process;detoxification;response to stimulus	cellular anatomical entity	catalytic activity;binding	Energy production and conversion	Fatty acid degradation; Glycolysis / Gluconeogenesis; Metabolic pathways; Pyruvate metabolism; Carbon metabolism; Metabolism of xenobiotics by cytochrome P450; Retinol metabolism; Tyrosine metabolism; Drug metabolism - cytochrome P450
Programmed cell death 6-interacting protein OS=Fasciola gigantica OX=46835 GN=FGIG_11342 PE=4 SV=1	F.gigantica	tr|A0A504YU64|A0A504YU64_FASGI	4	4	27.57	214	23686.8	--	--	--	--	Endocytosis
IST1 homolog OS=Fasciola gigantica OX=46835 GN=FGIG_02272 PE=3 SV=1	F.gigantica	tr|A0A504Y734|A0A504Y734_FASGI	4	4	11.78	365	39383.8	biological adhesion;growth;cellular process;biological process involved in interspecies interaction between organisms;response to stimulus;developmental process;viral process;localization;metabolic process;biological regulation	cellular anatomical entity	binding	--	Endocytosis
Annexin OS=Fasciola gigantica OX=46835 GN=FGIG_06592 PE=3 SV=1	F.gigantica	tr|A0A504Z5J0|A0A504Z5J0_FASGI	4	4	19.23	208	23517.6	--	--	--	--	--
Putative pyrophosphate-dependent phosphofructo-1-kinase OS=Fasciola gigantica OX=46835 GN=FGIG_04849 PE=4 SV=1	F.gigantica	tr|A0A504YDK3|A0A504YDK3_FASGI	5	5	14.29	420	46427.1	cellular process;metabolic process;biological regulation	protein-containing complex;cellular anatomical entity	catalytic activity;binding	Carbohydrate transport and metabolism	Fructose and mannose metabolism; Metabolic pathways; Galactose metabolism; Glycolysis / Gluconeogenesis; Pentose phosphate pathway; RNA degradation; Carbon metabolism; Biosynthesis of amino acids
Peptidylprolyl isomerase OS=Fasciola gigantica OX=46835 GN=FGIG_11294 PE=4 SV=1	F.gigantica	tr|A0A504YWR6|A0A504YWR6_FASGI	4	4	15.97	432	48599.7	reproductive process;biological regulation;developmental process;cellular process;localization	cellular anatomical entity	binding	--	--
Glutathione peroxidase OS=Fasciola gigantica OX=46835 GN=FGIG_06396 PE=3 SV=1	F.gigantica	tr|A0A504Y9C3|A0A504Y9C3_FASGI	4	4	63.77	69	7977.2	response to stimulus;detoxification;cellular process	--	catalytic activity;antioxidant activity	Lipid transport and metabolism;Defense mechanisms	Glutathione metabolism; Metabolic pathways
Cathepsin L (Fragment) OS=Fasciola gigantica OX=46835 GN=cat-L1F PE=2 SV=1	F.gigantica	tr|Q9NGW0|Q9NGW0_FASGI	5	4	31.05	219	24415.3	metabolic process	cellular anatomical entity	catalytic activity	Inorganic ion transport and metabolism;Function unknown	Autophagy - animal; Apoptosis; Phagosome; Lysosome
Glucose-6-phosphate isomerase OS=Fasciola gigantica OX=46835 GN=FGIG_06020 PE=3 SV=1	F.gigantica	tr|A0A504YE35|A0A504YE35_FASGI	4	4	21.58	292	32854.6	developmental process;cellular process;immune system process;multicellular organismal process;biological regulation;metabolic process	cellular anatomical entity	binding;catalytic activity	Carbohydrate transport and metabolism	Glycolysis / Gluconeogenesis; Metabolic pathways; Starch and sucrose metabolism; Carbon metabolism; Amino sugar and nucleotide sugar metabolism; Pentose phosphate pathway; Biosynthesis of nucleotide sugars
Putative actin-depolymerizing factor OS=Fasciola gigantica OX=46835 GN=FGIG_03015 PE=3 SV=1	F.gigantica	tr|A0A504Y8J6|A0A504Y8J6_FASGI	4	4	37.04	135	15610.6	biological regulation;developmental process;cellular process	cellular anatomical entity	binding	--	--
Rab GDP dissociation inhibitor OS=Fasciola gigantica OX=46835 GN=FGIG_12043 PE=3 SV=1	F.gigantica	tr|A0A504YZV0|A0A504YZV0_FASGI	4	3	16.67	408	46701.5	--	--	--	--	--
Lysosomal Pro-X carboxypeptidase OS=Fasciola gigantica OX=46835 GN=FGIG_09439 PE=3 SV=1	F.gigantica	tr|A0A504YTN5|A0A504YTN5_FASGI	4	4	14.07	334	37720	biological regulation;metabolic process;response to stimulus	--	catalytic activity	--	--
Uncharacterized protein OS=Fasciola gigantica OX=46835 GN=FGIG_12185 PE=4 SV=1	F.gigantica	tr|A0A504YDR8|A0A504YDR8_FASGI	3	3	27.12	118	12778.1	--	--	--	--	--
Calponin OS=Fasciola gigantica OX=46835 GN=FGIG_00165 PE=3 SV=1	F.gigantica	tr|A0A504Y7U6|A0A504Y7U6_FASGI	4	4	18.28	361	38478.5	cellular process	--	binding	--	--
Glycogenin glucosyltransferase OS=Fasciola gigantica OX=46835 GN=FGIG_00957 PE=4 SV=1	F.gigantica	tr|A0A504Y9R7|A0A504Y9R7_FASGI	4	4	23.46	324	37270.1	metabolic process;cellular process	cellular anatomical entity	catalytic activity;binding	--	Metabolic pathways; Starch and sucrose metabolism
Translationally controlled tumor-associated OS=Fasciola gigantica OX=46835 GN=FGIG_03252 PE=3 SV=1	F.gigantica	tr|A0A504Y9U6|A0A504Y9U6_FASGI	3	3	17.75	169	19896.4	response to stimulus;biological regulation;biological process involved in interspecies interaction between organisms	protein-containing complex;cellular anatomical entity	binding	--	--
Exportin-2 OS=Fasciola gigantica OX=46835 GN=FGIG_08874 PE=3 SV=1	F.gigantica	tr|A0A504YZP5|A0A504YZP5_FASGI	3	3	3.826	967	107933	localization;cellular process;biological regulation	cellular anatomical entity	binding	--	Nucleocytoplasmic transport
Putative Cofilin actophorin OS=Fasciola gigantica OX=46835 GN=FGIG_02872 PE=3 SV=1	F.gigantica	tr|A0A504Z805|A0A504Z805_FASGI	4	4	42.96	135	15646.9	cellular process	cellular anatomical entity	binding	--	--
Chaperonin containing T-complex polypeptide subunit zeta OS=Fasciola gigantica OX=46835 GN=FGIG_03371 PE=3 SV=1	F.gigantica	tr|A0A504YPN0|A0A504YPN0_FASGI	4	4	8.958	547	59738.6	reproductive process;biological regulation;localization;cellular process	cellular anatomical entity;protein-containing complex	binding;protein folding chaperone	Posttranslational modification, protein turnover, chaperones	--
GTP-binding nuclear protein OS=Fasciola gigantica OX=46835 GN=FGIG_05103 PE=3 SV=1	F.gigantica	tr|A0A504YQR1|A0A504YQR1_FASGI	4	4	22.69	216	24717.2	biological regulation;developmental process;cellular process;localization	protein-containing complex;cellular anatomical entity	catalytic activity;binding	General function prediction only;Transcription	Nucleocytoplasmic transport; Ribosome biogenesis in eukaryotes
Uncharacterized protein OS=Fasciola gigantica OX=46835 GN=FGIG_03895 PE=4 SV=1	F.gigantica	tr|A0A504YEP0|A0A504YEP0_FASGI	4	4	14.12	432	47253.2	--	--	--	--	--
T-complex protein 1 subunit gamma OS=Fasciola gigantica OX=46835 GN=FGIG_02826 PE=3 SV=1	F.gigantica	tr|A0A504YS00|A0A504YS00_FASGI	3	3	6.044	546	59636.7	reproductive process;developmental process;cellular process;localization;biological regulation	protein-containing complex;cellular anatomical entity	binding	Posttranslational modification, protein turnover, chaperones	--
Putative laminin OS=Fasciola gigantica OX=46835 GN=FGIG_08749 PE=4 SV=1	F.gigantica	tr|A0A504YJT9|A0A504YJT9_FASGI	3	3	1.819	1814	201200	--	--	--	--	ECM-receptor interaction
Actin-interacting protein 1 (Fragment) OS=Fasciola gigantica OX=46835 GN=FGIG_08755 PE=4 SV=1	F.gigantica	tr|A0A504Z4Z2|A0A504Z4Z2_FASGI	3	3	18.85	191	20781.5	locomotion;reproductive process;biological regulation;cellular process;localization	cellular anatomical entity	--	--	--
Putative aminopeptidase W07G4.4 OS=Fasciola gigantica OX=46835 GN=FGIG_00411 PE=4 SV=1	F.gigantica	tr|A0A504YZM7|A0A504YZM7_FASGI	4	4	29.85	134	15181.5	--	--	--	--	Glutathione metabolism; Metabolic pathways
Bravo_FIGEY domain-containing protein OS=Fasciola gigantica OX=46835 GN=FGIG_03250 PE=4 SV=1	F.gigantica	tr|A0A504Y7M0|A0A504Y7M0_FASGI	4	4	8.114	875	96905.4	--	--	--	--	--
Purine nucleoside phosphorylase OS=Fasciola gigantica OX=46835 GN=FGIG_09928 PE=3 SV=1	F.gigantica	tr|A0A504YB65|A0A504YB65_FASGI	5	5	22.38	286	31047.2	response to stimulus;multicellular organismal process;metabolic process;biological regulation;immune system process;cellular process	cellular anatomical entity	catalytic activity;binding	Nucleotide transport and metabolism	Metabolic pathways; Pyrimidine metabolism; Nicotinate and nicotinamide metabolism; Purine metabolism
Coproporphyrinogen oxidase OS=Fasciola gigantica OX=46835 GN=FGIG_09992 PE=3 SV=1	F.gigantica	tr|A0A504YY15|A0A504YY15_FASGI	3	3	6.311	412	47799.3	cellular process;metabolic process	cellular anatomical entity	binding;catalytic activity	Coenzyme transport and metabolism	Porphyrin and chlorophyll metabolism; Biosynthesis of cofactors; Metabolic pathways
Paramyosin OS=Fasciola gigantica OX=46835 GN=FGIG_02459 PE=3 SV=1	F.gigantica	tr|A0A504Z290|A0A504Z290_FASGI	4	4	4.624	865	99483.4	--	cellular anatomical entity	cytoskeletal motor activity	--	--
Putative actin-interacting protein 1 OS=Fasciola gigantica OX=46835 GN=FGIG_08754 PE=4 SV=1	F.gigantica	tr|A0A504Z501|A0A504Z501_FASGI	3	3	19.09	330	35952.4	localization;developmental process;cellular process;regulation of biological process	--	--	--	--
AQP-2 OS=Fasciola gigantica OX=46835 GN=AQP-2 PE=2 SV=1	F.gigantica	tr|E3UZI5|E3UZI5_FASGI	3	3	6.78	295	32426.5	--	--	--	Carbohydrate transport and metabolism	--
CUB domain-containing protein OS=Fasciola gigantica OX=46835 GN=FGIG_03244 PE=4 SV=1	F.gigantica	tr|A0A504Z0I2|A0A504Z0I2_FASGI	3	3	12.54	311	34475.9	--	--	--	--	--
Leucine-rich repeat-containing protein 23 OS=Fasciola gigantica OX=46835 GN=FGIG_07287 PE=4 SV=1	F.gigantica	tr|A0A504YJ46|A0A504YJ46_FASGI	3	3	10.81	370	41718.2	--	--	--	--	--
Uncharacterized protein OS=Fasciola gigantica OX=46835 GN=FGIG_01166 PE=4 SV=1	F.gigantica	tr|A0A504YXP1|A0A504YXP1_FASGI	3	3	2.708	1551	174872	--	--	--	--	--
Dihydrolipoamide acetyltransferase component of pyruvate dehydrogenase complex OS=Fasciola gigantica OX=46835 GN=FGIG_08469 PE=3 SV=1	F.gigantica	tr|A0A504YEA7|A0A504YEA7_FASGI	3	3	9.069	419	45555.4	metabolic process;cellular process	protein-containing complex;cellular anatomical entity	binding;catalytic activity	Energy production and conversion	Metabolic pathways; Propanoate metabolism; Valine, leucine and isoleucine degradation
Coatomer subunit alpha OS=Fasciola gigantica OX=46835 GN=FGIG_01593 PE=4 SV=1	F.gigantica	tr|A0A504YBD2|A0A504YBD2_FASGI	4	4	4.68	1111	123735	localization;cellular process;multicellular organismal process;biological regulation	protein-containing complex;cellular anatomical entity	binding	--	--
V-type proton ATPase subunit a OS=Fasciola gigantica OX=46835 GN=FGIG_00170 PE=3 SV=1	F.gigantica	tr|A0A504YEN2|A0A504YEN2_FASGI	3	3	4.54	881	99401.2	cellular process;localization;biological regulation;metabolic process	protein-containing complex;cellular anatomical entity	transporter activity;binding;ATP-dependent activity	Energy production and conversion	Metabolic pathways; Oxidative phosphorylation; Lysosome; Phagosome
Mitogen-activated protein kinase OS=Fasciola gigantica OX=46835 GN=FGIG_02161 PE=3 SV=1	F.gigantica	tr|A0A504Y668|A0A504Y668_FASGI	4	3	19.37	351	40105	multicellular organismal process;biological regulation;metabolic process;localization;viral process;developmental process;behavior;response to stimulus;immune system process;cellular process	cellular anatomical entity;protein-containing complex	catalytic activity;binding	Defense mechanisms;Cell wall/membrane/envelope biogenesis;Transcription;Posttranslational modification, protein turnover, chaperones;Intracellular trafficking, secretion, and vesicular transport	mTOR signaling pathway; Autophagy - animal; Dorso-ventral axis formation; FoxO signaling pathway; Apoptosis - fly; MAPK signaling pathway - fly; TGF-beta signaling pathway
Queuosine salvage protein OS=Fasciola gigantica OX=46835 GN=FGIG_02089 PE=3 SV=1	F.gigantica	tr|A0A504YER7|A0A504YER7_FASGI	3	3	5.605	785	88407.3	--	--	--	--	--
Cullin-associated NEDD8-dissociated protein 1 OS=Fasciola gigantica OX=46835 GN=FGIG_11904 PE=4 SV=1	F.gigantica	tr|A0A504YIT7|A0A504YIT7_FASGI	3	3	8.961	491	54567.9	metabolic process;biological regulation;cellular process;developmental process	protein-containing complex;cellular anatomical entity	binding	--	--
Uncharacterized protein OS=Fasciola gigantica OX=46835 GN=FGIG_03274 PE=4 SV=1	F.gigantica	tr|A0A504YDF3|A0A504YDF3_FASGI	4	4	38.52	135	14843.9	--	--	--	--	--
Tetraspanin OS=Fasciola gigantica OX=46835 GN=FGIG_03543 PE=3 SV=1	F.gigantica	tr|A0A504Z060|A0A504Z060_FASGI	3	3	20.18	218	23970.1	--	cellular anatomical entity	--	--	Lysosome
Eupitrilysin (M16 family) OS=Fasciola gigantica OX=46835 GN=FGIG_05963 PE=4 SV=1	F.gigantica	tr|A0A504Z8W2|A0A504Z8W2_FASGI	4	4	8.544	515	57659.2	metabolic process	cellular anatomical entity	catalytic activity	Posttranslational modification, protein turnover, chaperones	--
Thioredoxin dependent peroxide reductase OS=Fasciola gigantica OX=46835 GN=FGIG_05317 PE=3 SV=1	F.gigantica	tr|A0A504YI61|A0A504YI61_FASGI	3	3	16.82	220	24464	detoxification;cellular process	--	antioxidant activity;catalytic activity	Defense mechanisms	--
Histone H2B OS=Fasciola gigantica OX=46835 GN=FGIG_11587 PE=3 SV=1; Histone H2B OS=Fasciola gigantica OX=46835 GN=FGIG_02169 PE=3 SV=1	F.gigantica	tr|A0A504Z6J7|A0A504Z6J7_FASGI;tr|A0A504Y6T2|A0A504Y6T2_FASGI	3	3	27.05	122	13676.9	cellular process	protein-containing complex;cellular anatomical entity	binding	--	--
Serine/threonine-protein phosphatase 2A 65 kDa regulatory subunit A alpha isoform OS=Fasciola gigantica OX=46835 GN=FGIG_10421 PE=4 SV=1	F.gigantica	tr|A0A504Z0C8|A0A504Z0C8_FASGI	3	3	7.54	504	56565.6	biological regulation;cellular process	--	--	--	TGF-beta signaling pathway; mRNA surveillance pathway; Hippo signaling pathway - fly
Alpha actinin sarcomeric OS=Fasciola gigantica OX=46835 GN=FGIG_00789 PE=3 SV=1	F.gigantica	tr|A0A504YAD4|A0A504YAD4_FASGI	6	4	8.444	900	104738	multicellular organismal process;metabolic process;cellular process;behavior	cellular anatomical entity	binding;catalytic activity	--	--
Histone H4 OS=Fasciola gigantica OX=46835 GN=FGIG_09044 PE=3 SV=1	F.gigantica	tr|A0A504Z5J4|A0A504Z5J4_FASGI	3	3	29.13	103	11367.3	response to stimulus;cellular process;multicellular organismal process;metabolic process;biological regulation	protein-containing complex;cellular anatomical entity	binding	--	--
MF6 OS=Fasciola gigantica OX=46835 GN=FGIG_04341 PE=2 SV=1	F.gigantica	tr|A0A286RXS6|A0A286RXS6_FASGI	3	3	26.67	90	10242.9	--	--	--	--	--
Tubulin alpha chain OS=Fasciola gigantica OX=46835 GN=FGIG_10904 PE=3 SV=1	F.gigantica	tr|A0A504YSA5|A0A504YSA5_FASGI	5	4	15.56	514	57205.4	localization;cellular process	cellular anatomical entity	catalytic activity;binding;structural molecule activity	--	Phagosome
Putative Ribonucleotide-diphosphate reductase small subunit OS=Fasciola gigantica OX=46835 GN=FGIG_04903 PE=3 SV=1	F.gigantica	tr|A0A504YXP2|A0A504YXP2_FASGI	4	4	19.84	257	29872.9	--	--	--	Nucleotide transport and metabolism	p53 signaling pathway; Metabolic pathways; Glutathione metabolism; Purine metabolism; Pyrimidine metabolism; Drug metabolism - other enzymes
ATP:UMP phosphotransferase OS=Fasciola gigantica OX=46835 GN=FGIG_02158 PE=3 SV=1	F.gigantica	tr|A0A504Y7J3|A0A504Y7J3_FASGI	3	3	35.62	160	18743.4	cellular process;metabolic process	cellular anatomical entity	binding;catalytic activity	Nucleotide transport and metabolism	Biosynthesis of cofactors; Metabolic pathways; Purine metabolism; Thiamine metabolism
Fumarate hydratase class I anaerobic OS=Fasciola gigantica OX=46835 GN=FGIG_00729 PE=3 SV=1	F.gigantica	tr|A0A504YJH6|A0A504YJH6_FASGI	2	2	10.98	255	27877.7	cellular process;metabolic process	--	catalytic activity	--	Carbon metabolism; Metabolic pathways; Pyruvate metabolism; Citrate cycle (TCA cycle)
SOCS box domain-containing protein OS=Fasciola gigantica OX=46835 GN=FGIG_06104 PE=4 SV=1	F.gigantica	tr|A0A504Z5S3|A0A504Z5S3_FASGI	5	5	18.96	385	44379.7	--	--	--	--	--
Neuroserpin OS=Fasciola gigantica OX=46835 GN=FGIG_01893 PE=3 SV=1	F.gigantica	tr|A0A504YR08|A0A504YR08_FASGI	4	4	14.74	407	45990.8	--	--	--	Posttranslational modification, protein turnover, chaperones	--
Neurogenic locus notch protein OS=Fasciola gigantica OX=46835 GN=FGIG_09480 PE=4 SV=1	F.gigantica	tr|A0A504YDC1|A0A504YDC1_FASGI	3	3	4.972	885	96931.1	--	--	--	--	--
Ubiquitin carboxyl-terminal hydrolase OS=Fasciola gigantica OX=46835 GN=FGIG_07368 PE=3 SV=1	F.gigantica	tr|A0A504YVF7|A0A504YVF7_FASGI	2	2	12.84	218	24623.9	response to stimulus;multicellular organismal process;metabolic process;biological regulation;localization;developmental process;behavior;cellular process	cellular anatomical entity	binding;catalytic activity	--	--
Putative annexin (Fragment) OS=Fasciola gigantica OX=46835 GN=FGIG_11369 PE=3 SV=1	F.gigantica	tr|A0A504YXG1|A0A504YXG1_FASGI	3	3	10.42	192	22108.6	response to stimulus;negative regulation of biological process;cellular process;biological regulation	--	binding	--	--
Ubiquitin-conjugating enzyme OS=Fasciola gigantica OX=46835 GN=FGIG_06690 PE=3 SV=1	F.gigantica	tr|A0A504Z296|A0A504Z296_FASGI	3	3	24.24	165	19063.1	response to stimulus;cellular process;biological regulation;metabolic process	cellular anatomical entity	transcription regulator activity;catalytic activity;binding;molecular function regulator	--	Ubiquitin mediated proteolysis
Placenta-specificprotein 8 protein OS=Fasciola gigantica OX=46835 GN=FGIG_07833 PE=3 SV=1	F.gigantica	tr|A0A504YXV3|A0A504YXV3_FASGI	3	3	40	115	13234.2	--	--	--	--	--
Glycine cleavage system P protein OS=Fasciola gigantica OX=46835 GN=FGIG_04986 PE=3 SV=1	F.gigantica	tr|A0A504YUZ3|A0A504YUZ3_FASGI	2	2	3.282	914	101088	metabolic process;cellular process	cellular anatomical entity;protein-containing complex	catalytic activity;binding	--	Metabolic pathways; Glycine, serine and threonine metabolism; Carbon metabolism; Glyoxylate and dicarboxylate metabolism
Globin-3 OS=Fasciola gigantica OX=46835 GN=FGIG_04911 PE=3 SV=1	F.gigantica	tr|A0A504YZF9|A0A504YZF9_FASGI	5	3	53.69	149	17091.5	--	--	binding	--	--
Alpha-aminoadipic semialdehyde synthase mitochondrial OS=Fasciola gigantica OX=46835 GN=FGIG_09527 PE=4 SV=1	F.gigantica	tr|A0A504YZ46|A0A504YZ46_FASGI	2	2	23.16	95	10546.3	--	--	--	Amino acid transport and metabolism	Metabolic pathways; Lysine degradation
Uncharacterized protein OS=Fasciola gigantica OX=46835 GN=FGIG_02369 PE=4 SV=1	F.gigantica	tr|A0A504Y554|A0A504Y554_FASGI	2	2	2.079	1010	110847	--	--	--	--	--
Uncharacterized protein OS=Fasciola gigantica OX=46835 GN=FGIG_09570 PE=4 SV=1	F.gigantica	tr|A0A504YEF3|A0A504YEF3_FASGI	3	3	22.17	221	25942.6	--	--	--	--	--
Asparaginase OS=Fasciola gigantica OX=46835 GN=FGIG_01323 PE=4 SV=1	F.gigantica	tr|A0A504YPB6|A0A504YPB6_FASGI	3	3	6.936	519	56763.2	metabolic process;cellular process	--	catalytic activity	Amino acid transport and metabolism;Translation, ribosomal structure and biogenesis	--
Suppressor of profilin 2 OS=Fasciola gigantica OX=46835 GN=FGIG_12414 PE=3 SV=1	F.gigantica	tr|A0A504YMI1|A0A504YMI1_FASGI	2	2	8.734	229	25323.8	multicellular organismal process;biological regulation;localization;developmental process;response to stimulus;cellular process;biological adhesion;reproductive process	protein-containing complex;cellular anatomical entity	binding	--	Endocytosis
ADF-H domain-containing protein OS=Fasciola gigantica OX=46835 GN=FGIG_01188 PE=3 SV=1	F.gigantica	tr|A0A504Z9P6|A0A504Z9P6_FASGI	3	3	24.65	142	15906.9	reproductive process;developmental process;cellular process	cellular anatomical entity	binding	--	--
Uncharacterized protein OS=Fasciola gigantica OX=46835 GN=FGIG_02370 PE=4 SV=1	F.gigantica	tr|A0A504Y4W0|A0A504Y4W0_FASGI	2	2	5.097	412	45222.1	--	--	--	--	--
14-3-3 epsilon isoform OS=Fasciola gigantica OX=46835 PE=2 SV=1; 14-3-3 protein epsilon OS=Fasciola gigantica OX=46835 GN=FGIG_12158 PE=3 SV=1	F.gigantica	tr|A0A5S8ZDC9|A0A5S8ZDC9_FASGI;tr|A0A504YKF3|A0A504YKF3_FASGI	4	2	27.24	257	29289	locomotion;response to stimulus;reproductive process;multicellular organismal process;biological regulation;developmental process;cellular process	cellular anatomical entity;protein-containing complex	catalytic activity;binding	--	Hippo signaling pathway - fly
Platelet-activating factor acetylhydrolase IB subunit gamma OS=Fasciola gigantica OX=46835 GN=FGIG_07313 PE=4 SV=1	F.gigantica	tr|A0A504YQJ3|A0A504YQJ3_FASGI	2	2	13.1	229	25969.4	reproductive process;developmental process;cellular process;biological regulation;metabolic process	cellular anatomical entity	binding;catalytic activity	Carbohydrate transport and metabolism;Lipid transport and metabolism;Cell cycle control, cell division, chromosome partitioning	Ether lipid metabolism; Metabolic pathways
Adenylate kinase isoenzyme 1 OS=Fasciola gigantica OX=46835 GN=FGIG_02159 PE=3 SV=1	F.gigantica	tr|A0A504Y532|A0A504Y532_FASGI	3	3	25.74	136	14963.3	--	--	--	Nucleotide transport and metabolism	Metabolic pathways; Biosynthesis of cofactors; Thiamine metabolism; Purine metabolism
Glucose transporter OS=Fasciola gigantica OX=46835 PE=2 SV=1	F.gigantica	tr|I6Z120|I6Z120_FASGI	3	3	7.525	505	54328.4	response to stimulus;cellular process;localization	cellular anatomical entity	transporter activity;binding	Amino acid transport and metabolism;General function prediction only;Inorganic ion transport and metabolism	--
Exportin-1 OS=Fasciola gigantica OX=46835 GN=FGIG_12357 PE=3 SV=1	F.gigantica	tr|A0A504YDK9|A0A504YDK9_FASGI	2	2	4.367	458	52954	multi-organism process;biological regulation;localization;viral process;cellular process;response to stimulus	protein-containing complex;cellular anatomical entity	binding;molecular carrier activity	--	Nucleocytoplasmic transport; Ribosome biogenesis in eukaryotes
Uncharacterized protein (Fragment) OS=Fasciola gigantica OX=46835 GN=FGIG_10213 PE=4 SV=1	F.gigantica	tr|A0A504Y7X1|A0A504Y7X1_FASGI	2	2	24.69	162	18391	--	--	--	--	--
Calcium binding protein 39 OS=Fasciola gigantica OX=46835 GN=FGIG_09076 PE=3 SV=1	F.gigantica	tr|A0A504YXL7|A0A504YXL7_FASGI	2	2	6.158	406	46613	biological regulation	cellular anatomical entity	binding	--	mTOR signaling pathway
Microtubule-associated protein RP/EB family member OS=Fasciola gigantica OX=46835 GN=FGIG_04512 PE=4 SV=1	F.gigantica	tr|A0A504YW74|A0A504YW74_FASGI	2	2	10.48	248	27945.7	biological regulation;localization;cellular process	cellular anatomical entity	binding	--	--
Pyruvate dehydrogenase E1 component subunit alpha OS=Fasciola gigantica OX=46835 GN=FGIG_02061 PE=4 SV=1	F.gigantica	tr|A0A504YAI3|A0A504YAI3_FASGI	2	2	6.41	390	43334.9	localization;cellular process;developmental process;multicellular organismal process;metabolic process;reproductive process	cellular anatomical entity	catalytic activity	Energy production and conversion	Glycolysis / Gluconeogenesis; Metabolic pathways; Carbon metabolism; Pyruvate metabolism; Citrate cycle (TCA cycle)
Kunitz protein 8 OS=Fasciola gigantica OX=46835 GN=FGIG_05379 PE=4 SV=1	F.gigantica	tr|A0A504Z2I4|A0A504Z2I4_FASGI	2	2	29.76	84	9126.4	--	--	--	--	--
Dynein light chain OS=Fasciola gigantica OX=46835 GN=FGIG_05227 PE=3 SV=1	F.gigantica	tr|A0A504X0J9|A0A504X0J9_FASGI	2	2	10.53	95	11470	biological regulation;metabolic process;multicellular organismal process;cellular process;developmental process;localization;reproductive process	protein-containing complex;cellular anatomical entity	catalytic activity;binding	--	Salmonella infection
V-type proton ATPase subunit H OS=Fasciola gigantica OX=46835 GN=FGIG_02726 PE=3 SV=1	F.gigantica	tr|A0A504YTB2|A0A504YTB2_FASGI	2	2	8.92	426	49639.5	viral process;pigmentation;cellular process;localization;biological regulation	cellular anatomical entity;protein-containing complex	transporter activity;binding;ATP-dependent activity	--	Oxidative phosphorylation; mTOR signaling pathway; Metabolic pathways; Phagosome; Lysosome
Lysosomal alpha-glucosidase OS=Fasciola gigantica OX=46835 GN=FGIG_05015 PE=3 SV=1	F.gigantica	tr|A0A504YSY0|A0A504YSY0_FASGI	2	2	3.631	1322	149139	--	cellular anatomical entity	catalytic activity	Carbohydrate transport and metabolism	--
Coatomer subunit beta OS=Fasciola gigantica OX=46835 GN=FGIG_09256 PE=4 SV=1	F.gigantica	tr|A0A504YWR0|A0A504YWR0_FASGI	2	2	3.056	1047	118116	--	--	--	--	--
Fructose-bisphosphatase OS=Fasciola gigantica OX=46835 GN=FGIG_00371 PE=3 SV=1	F.gigantica	tr|A0A504XEA1|A0A504XEA1_FASGI	10	2	46.9	290	31263.5	cellular process;metabolic process	--	catalytic activity;binding	Carbohydrate transport and metabolism	Metabolic pathways; Carbon metabolism; Glycolysis / Gluconeogenesis; Pentose phosphate pathway; Fructose and mannose metabolism
Fh51 OS=Fasciola gigantica OX=46835 GN=FGIG_08353 PE=4 SV=1	F.gigantica	tr|A0A504Z0W5|A0A504Z0W5_FASGI	3	3	31.78	107	12544.3	--	--	--	--	Drug metabolism - other enzymes; Metabolism of xenobiotics by cytochrome P450; Drug metabolism - cytochrome P450; Glutathione metabolism; Metabolic pathways
Uncharacterized protein OS=Fasciola gigantica OX=46835 GN=FGIG_01347 PE=4 SV=1	F.gigantica	tr|A0A504YKL8|A0A504YKL8_FASGI	2	2	10.88	239	26798.4	--	--	--	--	--
UDP-glucose 4-epimerase OS=Fasciola gigantica OX=46835 GN=FGIG_08599 PE=3 SV=1	F.gigantica	tr|A0A504Z4Z1|A0A504Z4Z1_FASGI	2	2	6.997	343	38136.5	cellular process;metabolic process	cellular anatomical entity	catalytic activity;binding	Cell wall/membrane/envelope biogenesis	Biosynthesis of nucleotide sugars; Amino sugar and nucleotide sugar metabolism; Metabolic pathways; Galactose metabolism
Tegument antigen OS=Fasciola gigantica OX=46835 GN=FGIG_04680 PE=4 SV=1	F.gigantica	tr|A0A504YFG3|A0A504YFG3_FASGI	2	2	6.915	188	21178.1	--	--	--	--	--
SCP domain-containing protein OS=Fasciola gigantica OX=46835 GN=FGIG_01007 PE=4 SV=1	F.gigantica	tr|A0A504YIP0|A0A504YIP0_FASGI	2	2	11.64	189	21616.8	--	--	--	--	--
Transforming growth factor-beta-induced protein ig-h3 (Fragment) OS=Fasciola gigantica OX=46835 GN=FGIG_09414 PE=4 SV=1	F.gigantica	tr|A0A504YAW2|A0A504YAW2_FASGI	2	2	5.338	562	64182.2	cellular process;multicellular organismal process	cellular anatomical entity	binding	General function prediction only	--
COP9 signalosome complex subunit 3 OS=Fasciola gigantica OX=46835 GN=FGIG_00333 PE=3 SV=1	F.gigantica	tr|A0A504YMV7|A0A504YMV7_FASGI	2	2	6.635	422	47955.2	response to stimulus;developmental process;cellular process;multicellular organismal process;metabolic process	protein-containing complex;cellular anatomical entity	binding	--	--
CCT-theta OS=Fasciola gigantica OX=46835 GN=FGIG_09793 PE=3 SV=1	F.gigantica	tr|A0A504YNF9|A0A504YNF9_FASGI	2	2	2.518	1112	122495	multicellular organismal process;biological regulation;behavior;cellular process	cellular anatomical entity;protein-containing complex	binding;catalytic activity	Posttranslational modification, protein turnover, chaperones	--
Uncharacterized protein (Fragment) OS=Fasciola gigantica OX=46835 GN=FGIG_08173 PE=4 SV=1	F.gigantica	tr|A0A504Y8Q2|A0A504Y8Q2_FASGI	2	2	6.863	408	46054	--	--	--	--	--
Fh47 OS=Fasciola gigantica OX=46835 GN=FGIG_10895 PE=4 SV=1	F.gigantica	tr|A0A504ZC40|A0A504ZC40_FASGI	5	4	17.39	207	23963.4	metabolic process;cellular process	cellular anatomical entity	binding;catalytic activity	--	Drug metabolism - other enzymes; Metabolic pathways; Chemical carcinogenesis - DNA adducts; Pathways in cancer; Chemical carcinogenesis - receptor activation; Glutathione metabolism; Drug metabolism - cytochrome P450; Platinum drug resistance; Fluid shear stress and atherosclerosis; Metabolism of xenobiotics by cytochrome P450; Chemical carcinogenesis - reactive oxygen species; Hepatocellular car…
Dymeclin OS=Fasciola gigantica OX=46835 GN=FGIG_08782 PE=3 SV=1	F.gigantica	tr|A0A504YI21|A0A504YI21_FASGI	2	2	4.463	717	79514.4	developmental process;cellular process	cellular anatomical entity	binding	--	--
CCT-alpha OS=Fasciola gigantica OX=46835 GN=FGIG_10994 PE=3 SV=1	F.gigantica	tr|A0A504YGF9|A0A504YGF9_FASGI	2	2	3.617	553	60294.1	multicellular organismal process;metabolic process;biological regulation;localization;developmental process;reproductive process;biological process involved in interspecies interaction between organisms;cellular process	cellular anatomical entity;protein-containing complex	binding;catalytic activity	Posttranslational modification, protein turnover, chaperones	--
Acid sphingomyelinase phosphodiesterase 3a OS=Fasciola gigantica OX=46835 GN=FGIG_09336 PE=4 SV=1	F.gigantica	tr|A0A504YQ34|A0A504YQ34_FASGI	3	3	11.27	479	54414.4	--	--	--	--	--
Hsc70-interacting protein isoform X2 OS=Fasciola gigantica OX=46835 GN=FGIG_10602 PE=3 SV=1	F.gigantica	tr|A0A504Z116|A0A504Z116_FASGI	2	2	7.323	396	44511.8	cellular process	cellular anatomical entity	molecular adaptor activity	Posttranslational modification, protein turnover, chaperones;Cell wall/membrane/envelope biogenesis	--
Tegumental calcium-binding EF-hand protein 4 OS=Fasciola gigantica OX=46835 GN=CaBP4 PE=2 SV=1	F.gigantica	tr|H2DH28|H2DH28_FASGI	2	2	12.57	191	22250.3	cellular process	--	--	--	--
Uncharacterized protein OS=Fasciola gigantica OX=46835 GN=FGIG_05183 PE=4 SV=1	F.gigantica	tr|A0A504Y5V7|A0A504Y5V7_FASGI	3	3	20.79	202	22426.3	--	--	--	--	--
F-actin-capping protein subunit beta OS=Fasciola gigantica OX=46835 GN=FGIG_03122 PE=3 SV=1	F.gigantica	tr|A0A504Z3F4|A0A504Z3F4_FASGI	2	2	9.455	275	31098.9	cellular process;developmental process;multicellular organismal process;biological regulation;biological adhesion	protein-containing complex;cellular anatomical entity	binding	--	Endocytosis
Tetraspanin (Fragment) OS=Fasciola gigantica OX=46835 GN=FGIG_12136 PE=4 SV=1	F.gigantica	tr|A0A504YAG5|A0A504YAG5_FASGI	2	2	9.036	166	17786.8	cellular process;developmental process;biological regulation	protein-containing complex;cellular anatomical entity	binding	--	Lysosome; Proteoglycans in cancer
Phosphatidylinositol transfer protein alpha OS=Fasciola gigantica OX=46835 GN=FGIG_05603 PE=4 SV=1	F.gigantica	tr|A0A504YI44|A0A504YI44_FASGI	2	2	8.374	203	23210.6	--	--	--	--	--
Collagen type IV alpha 2 chain OS=Fasciola gigantica OX=46835 GN=FGIG_01356 PE=4 SV=1	F.gigantica	tr|A0A504Z0M2|A0A504Z0M2_FASGI	2	2	1.654	1632	163134	--	--	--	--	--
Farnesyl-pyrophosphate synthetase OS=Fasciola gigantica OX=46835 GN=FGIG_04602 PE=3 SV=1	F.gigantica	tr|A0A504Z1M2|A0A504Z1M2_FASGI	2	2	6.623	302	34353.9	developmental process;cellular process;metabolic process;biological regulation;response to stimulus;reproductive process	cellular anatomical entity	catalytic activity	Coenzyme transport and metabolism	Human T-cell leukemia virus 1 infection; Metabolic pathways; Influenza A; Terpenoid backbone biosynthesis
Rab-protein 8 OS=Fasciola gigantica OX=46835 GN=FGIG_06830 PE=4 SV=1	F.gigantica	tr|A0A504YU78|A0A504YU78_FASGI	4	4	13.49	215	24143.4	--	--	--	--	--
Lanthionine synthetase c like protein 1 OS=Fasciola gigantica OX=46835 GN=FGIG_06244 PE=3 SV=1	F.gigantica	tr|A0A504Y8Y1|A0A504Y8Y1_FASGI	3	3	10.98	428	47583.9	--	--	--	--	--
DnaJ like protein subfamily A member 1 OS=Fasciola gigantica OX=46835 GN=FGIG_04609 PE=3 SV=1	F.gigantica	tr|A0A504Z4Z3|A0A504Z4Z3_FASGI	2	2	8.706	402	44794.4	biological regulation;cellular process;developmental process;localization;reproductive process;locomotion	cellular anatomical entity	binding	Posttranslational modification, protein turnover, chaperones	Protein processing in endoplasmic reticulum
Ubiquitin-conjugating enzyme OS=Fasciola gigantica OX=46835 GN=FGIG_03290 PE=3 SV=1	F.gigantica	tr|A0A504Y2Y1|A0A504Y2Y1_FASGI	2	2	14.29	147	16642	reproductive process;locomotion;multicellular organismal process;metabolic process;biological regulation;developmental process;cellular process	protein-containing complex	binding;catalytic activity	Posttranslational modification, protein turnover, chaperones	Ubiquitin mediated proteolysis; Toll and Imd signaling pathway; Protein processing in endoplasmic reticulum; MAPK signaling pathway - fly
Tubulin-specific chaperone D OS=Fasciola gigantica OX=46835 GN=FGIG_01191 PE=3 SV=1	F.gigantica	tr|A0A504YBX5|A0A504YBX5_FASGI	2	2	2.56	1211	135842	biological regulation;cellular process	cellular anatomical entity	binding;molecular function regulator	--	--
Ubiquitin conjugating enzyme OS=Fasciola gigantica OX=46835 GN=FGIG_10388 PE=3 SV=1	F.gigantica	tr|A0A504YV37|A0A504YV37_FASGI	2	2	19.73	147	16556.6	metabolic process;biological regulation;multicellular organismal process;developmental process;response to stimulus;immune system process;cellular process;reproductive process	protein-containing complex;cellular anatomical entity	binding;catalytic activity	Posttranslational modification, protein turnover, chaperones	Ubiquitin mediated proteolysis; Protein processing in endoplasmic reticulum
Calreticulin OS=Fasciola gigantica OX=46835 GN=FGIG_09000 PE=3 SV=1	F.gigantica	tr|A0A504ZBD5|A0A504ZBD5_FASGI	2	2	9.026	421	48832.9	--	--	--	--	Protein processing in endoplasmic reticulum; Phagosome
Laminin gamma 1 OS=Fasciola gigantica OX=46835 GN=FGIG_02235 PE=4 SV=1	F.gigantica	tr|A0A504YHP8|A0A504YHP8_FASGI	2	2	3.267	704	78609.5	regulation of biological process;developmental process;cellular process	cellular anatomical entity	--	--	--
Tryptophanyl-tRNA synthetase OS=Fasciola gigantica OX=46835 GN=FGIG_10324 PE=3 SV=1	F.gigantica	tr|A0A504YKT7|A0A504YKT7_FASGI	2	2	7.656	418	47851.8	metabolic process;biological regulation;cellular process	cellular anatomical entity	catalytic activity;binding	Translation, ribosomal structure and biogenesis	Aminoacyl-tRNA biosynthesis
NAD-dependent succinate-semialdehyde dehydrogenase OS=Fasciola gigantica OX=46835 GN=FGIG_09129 PE=3 SV=1	F.gigantica	tr|A0A504YWE3|A0A504YWE3_FASGI	2	2	10.24	332	35221	cellular process;developmental process;multicellular organismal process;metabolic process;biological regulation	cellular anatomical entity	binding;catalytic activity	Lipid transport and metabolism	Butanoate metabolism; Metabolic pathways; Alanine, aspartate and glutamate metabolism
Orotidine 5'-phosphate decarboxylase OS=Fasciola gigantica OX=46835 GN=FGIG_07808 PE=3 SV=1	F.gigantica	tr|A0A504YFY9|A0A504YFY9_FASGI	2	2	2.065	1550	171025	cellular process;metabolic process	cellular anatomical entity	catalytic activity	--	Drug metabolism - other enzymes; Pyrimidine metabolism; Metabolic pathways; Biosynthesis of cofactors
D-aspartate oxidase OS=Fasciola gigantica OX=46835 GN=FGIG_07464 PE=3 SV=1	F.gigantica	tr|A0A504YPX4|A0A504YPX4_FASGI	2	2	7.198	389	42494.5	metabolic process	--	--	Amino acid transport and metabolism	D-Amino acid metabolism; Peroxisome; Alanine, aspartate and glutamate metabolism; Metabolic pathways
Glucose-regulated protein 94 OS=Fasciola gigantica OX=46835 GN=FGIG_08009 PE=3 SV=1	F.gigantica	tr|A0A504Z041|A0A504Z041_FASGI	5	2	5.623	818	92318	--	--	--	Posttranslational modification, protein turnover, chaperones	Protein processing in endoplasmic reticulum
Mitogen-activated protein kinase OS=Fasciola gigantica OX=46835 GN=FGIG_04734 PE=3 SV=1	F.gigantica	tr|A0A504Z1T8|A0A504Z1T8_FASGI	3	2	11.05	371	43167.3	developmental process;cellular process;immune system process;biological regulation;metabolic process;multicellular organismal process;response to stimulus	cellular anatomical entity	catalytic activity;binding	Cell wall/membrane/envelope biogenesis;Signal transduction mechanisms;Posttranslational modification, protein turnover, chaperones;Intracellular trafficking, secretion, and vesicular transport	FoxO signaling pathway; TGF-beta signaling pathway; mTOR signaling pathway; Autophagy - animal
BRO1 domain and CAAX motif containing OS=Fasciola gigantica OX=46835 GN=FGIG_04970 PE=3 SV=1	F.gigantica	tr|A0A504YRB3|A0A504YRB3_FASGI	1	1	3.497	429	48672.6	--	--	--	--	--
Enamine/imine deaminase OS=Fasciola gigantica OX=46835 GN=FGIG_10828 PE=3 SV=1	F.gigantica	tr|A0A504YC87|A0A504YC87_FASGI	2	2	3.709	701	78540.8	biological regulation;developmental process	cellular anatomical entity	catalytic activity;binding	Defense mechanisms	--
Putative Ras-related protein Rab-10 OS=Fasciola gigantica OX=46835 GN=FGIG_06242 PE=2 SV=1	F.gigantica	tr|A0A3G4YQA0|A0A3G4YQA0_FASGI	3	3	15.61	205	23090.3	response to stimulus;biological regulation;localization;cellular process;immune system process	cellular anatomical entity	catalytic activity;binding	--	Endocytosis
Voltage-dependent anion-selective channel protein 3 OS=Fasciola gigantica OX=46835 GN=FGIG_08900 PE=3 SV=1	F.gigantica	tr|A0A504YMY8|A0A504YMY8_FASGI	2	2	7.092	282	31812.2	--	--	--	--	--
Uncharacterized protein (Fragment) OS=Fasciola gigantica OX=46835 GN=FGIG_08085 PE=3 SV=1	F.gigantica	tr|A0A504YX05|A0A504YX05_FASGI	2	2	7.951	327	36454.4	--	--	--	--	--
Annexin OS=Fasciola gigantica OX=46835 GN=FGIG_11547 PE=3 SV=1	F.gigantica	tr|A0A504YXD8|A0A504YXD8_FASGI	2	2	25	84	9335.5	--	--	--	--	--
Multifunctional fusion protein OS=Fasciola gigantica OX=46835 GN=FGIG_07469 PE=3 SV=1	F.gigantica	tr|A0A504YWX7|A0A504YWX7_FASGI	2	2	4.181	574	63610.5	cellular process;metabolic process	cellular anatomical entity	catalytic activity;binding	Lipid transport and metabolism	Alanine, aspartate and glutamate metabolism; Arginine and proline metabolism; Metabolic pathways
Annexin OS=Fasciola gigantica OX=46835 GN=FGIG_02838 PE=3 SV=1	F.gigantica	tr|A0A504YFM5|A0A504YFM5_FASGI	2	2	8.487	271	30763.8	--	--	binding	--	--
Ubiquitin carboxyl-terminal hydrolase 7 OS=Fasciola gigantica OX=46835 GN=FGIG_04836 PE=3 SV=1	F.gigantica	tr|A0A504YL48|A0A504YL48_FASGI	2	2	1.756	1424	159260	--	--	--	--	FoxO signaling pathway
Receptor Mediated Endocytosis OS=Fasciola gigantica OX=46835 GN=FGIG_02145 PE=4 SV=1	F.gigantica	tr|A0A504Z6J5|A0A504Z6J5_FASGI	1	1	2.198	546	62259	developmental process;cellular process;localization;metabolic process;biological regulation;multicellular organismal process;reproductive process	cellular anatomical entity	binding;catalytic activity	General function prediction only	Endocytosis
Calpain catalytic domain-containing protein OS=Fasciola gigantica OX=46835 GN=FGIG_10865 PE=3 SV=1	F.gigantica	tr|A0A504YKK1|A0A504YKK1_FASGI	3	3	22.48	129	14323.4	--	--	catalytic activity	--	--
Uncharacterized protein OS=Fasciola gigantica OX=46835 GN=FGIG_06102 PE=4 SV=1	F.gigantica	tr|A0A504Z459|A0A504Z459_FASGI	2	2	25.16	159	18520.5	--	--	--	--	--
Armadillo type fold (Fragment) OS=Fasciola gigantica OX=46835 GN=FGIG_02734 PE=4 SV=1	F.gigantica	tr|A0A504YG60|A0A504YG60_FASGI	2	2	3.231	681	76184.1	--	--	--	--	--
ARF small monomeric GTPase OS=Fasciola gigantica OX=46835 GN=FGIG_08984 PE=3 SV=1	F.gigantica	tr|A0A504YVL4|A0A504YVL4_FASGI	4	2	36.46	181	20489.4	--	--	--	General function prediction only;Intracellular trafficking, secretion, and vesicular transport	Endocytosis
Constitutive heat shock protein 70 OS=Fasciola gigantica OX=46835 GN=FGIG_07732 PE=3 SV=1	F.gigantica	tr|A0A504Z3X5|A0A504Z3X5_FASGI	12	2	18.59	651	71132.7	cellular process;biological process involved in interspecies interaction between organisms;rhythmic process;growth;reproductive process;localization;developmental process;multicellular organismal process;metabolic process;biological regulation;response to stimulus	protein-containing complex;cellular anatomical entity	ATP-dependent activity;binding	Posttranslational modification, protein turnover, chaperones	Protein processing in endoplasmic reticulum; Spliceosome; MAPK signaling pathway; Endocytosis
Succinate dehydrogenase cytochrome b560 subunit, mitochondrial OS=Fasciola gigantica OX=46835 GN=FGIG_04170 PE=3 SV=1	F.gigantica	tr|A0A504YDU0|A0A504YDU0_FASGI	2	2	12.81	203	22654.5	metabolic process;cellular process	cellular anatomical entity;protein-containing complex	catalytic activity	Energy production and conversion	Metabolic pathways; Carbon metabolism; Oxidative phosphorylation; Citrate cycle (TCA cycle)
Paramyosin OS=Fasciola gigantica OX=46835 GN=FGIG_08945 PE=3 SV=1	F.gigantica	tr|A0A504Z112|A0A504Z112_FASGI	1	1	0.668	1946	223176	--	cellular anatomical entity	binding;cytoskeletal motor activity	--	--
Serine hydroxymethyltransferase OS=Fasciola gigantica OX=46835 GN=FGIG_10407 PE=3 SV=1	F.gigantica	tr|A0A504Y698|A0A504Y698_FASGI	2	2	4.183	526	56888.5	cellular process;metabolic process	cellular anatomical entity	catalytic activity;binding	Amino acid transport and metabolism	Biosynthesis of amino acids; Glycine, serine and threonine metabolism; Carbon metabolism; Metabolic pathways; Biosynthesis of cofactors; Glyoxylate and dicarboxylate metabolism; One carbon pool by folate
Seryl-tRNA synthetase OS=Fasciola gigantica OX=46835 GN=FGIG_09040 PE=4 SV=1	F.gigantica	tr|A0A504Z024|A0A504Z024_FASGI	2	2	5.752	452	49893	reproduction;developmental process;cellular process;multicellular organismal process;biological regulation;metabolic process;locomotion	cellular anatomical entity	binding;catalytic activity	Translation, ribosomal structure and biogenesis	Aminoacyl-tRNA biosynthesis
Uncharacterized protein OS=Fasciola gigantica OX=46835 GN=FGIG_10428 PE=4 SV=1	F.gigantica	tr|A0A504YPP7|A0A504YPP7_FASGI	2	2	4.315	394	45698.4	--	--	--	--	--
Phosphotransferase OS=Fasciola gigantica OX=46835 GN=FGIG_07283 PE=3 SV=1	F.gigantica	tr|A0A504YWR2|A0A504YWR2_FASGI	2	2	7.101	507	56396.2	--	--	--	Carbohydrate transport and metabolism	Carbon metabolism; Starch and sucrose metabolism; Amino sugar and nucleotide sugar metabolism; Galactose metabolism; Glycolysis / Gluconeogenesis; Metabolic pathways; Fructose and mannose metabolism; Biosynthesis of nucleotide sugars
L-lactate dehydrogenase OS=Fasciola gigantica OX=46835 GN=FGIG_12400 PE=3 SV=1	F.gigantica	tr|A0A504YZY8|A0A504YZY8_FASGI	2	2	6.098	328	35902.2	--	--	--	Energy production and conversion	Propanoate metabolism; Metabolic pathways; Glycolysis / Gluconeogenesis; Cysteine and methionine metabolism; Pyruvate metabolism
Stress-induced-phosphoprotein 1 OS=Fasciola gigantica OX=46835 GN=FGIG_09548 PE=4 SV=1	F.gigantica	tr|A0A504YKD1|A0A504YKD1_FASGI	2	2	10.03	319	36299	response to stimulus	cellular anatomical entity	binding	--	--
ADP-ribosyl cyclase/cyclic ADP-ribose hydrolase OS=Fasciola gigantica OX=46835 GN=FGIG_04434 PE=3 SV=1	F.gigantica	tr|A0A504YMY5|A0A504YMY5_FASGI	3	3	12.89	287	32362	--	--	--	--	--
Vesicle-fusing ATPase OS=Fasciola gigantica OX=46835 GN=FGIG_02077 PE=3 SV=1	F.gigantica	tr|A0A504Z0R7|A0A504Z0R7_FASGI	2	2	5.605	446	49001.3	response to stimulus;viral process;developmental process;localization;metabolic process;biological regulation;multicellular organismal process;cellular process	cellular anatomical entity;protein-containing complex	catalytic activity;ATP-dependent activity;binding	Signal transduction mechanisms;Cell cycle control, cell division, chromosome partitioning	Necroptosis; Endocytosis
Defective in cullin neddylation protein OS=Fasciola gigantica OX=46835 GN=FGIG_05889 PE=4 SV=1	F.gigantica	tr|A0A504YRA2|A0A504YRA2_FASGI	1	1	5.469	256	30409.5	metabolic process;cellular process	protein-containing complex	binding	--	--
Uncharacterized protein OS=Fasciola gigantica OX=46835 GN=FGIG_09569 PE=3 SV=1	F.gigantica	tr|A0A504XYC6|A0A504XYC6_FASGI	2	2	10.69	262	29038.4	localization;developmental process;cellular process;regulation of biological process	cellular anatomical entity	--	--	Lysosome; Phagosome; Oxidative phosphorylation; Metabolic pathways
Superoxide dismutase (Fragment) OS=Fasciola gigantica OX=46835 GN=FGIG_05938 PE=3 SV=1	F.gigantica	tr|A0A504YQ65|A0A504YQ65_FASGI	2	2	20	140	15515.3	detoxification;cellular process;response to stimulus;developmental process;behavior;multicellular organismal process;metabolic process;biological regulation	cellular anatomical entity	catalytic activity;binding;antioxidant activity	Inorganic ion transport and metabolism	Lipid and atherosclerosis; Longevity regulating pathway; Longevity regulating pathway - multiple species; FoxO signaling pathway; Peroxisome; Chemical carcinogenesis - reactive oxygen species; Huntington disease
Isoamyl acetate-hydrolyzing esterase 1 homolog OS=Fasciola gigantica OX=46835 GN=FGIG_10052 PE=3 SV=1	F.gigantica	tr|A0A504YFH4|A0A504YFH4_FASGI	2	2	10.08	258	29434.8	response to stimulus;cellular process;metabolic process;biological regulation	cellular anatomical entity	catalytic activity	--	--
Guanylate kinase OS=Fasciola gigantica OX=46835 GN=FGIG_03556 PE=3 SV=1	F.gigantica	tr|A0A504YCZ1|A0A504YCZ1_FASGI	1	1	2.817	639	72179.4	--	cellular anatomical entity	catalytic activity	General function prediction only;Nucleotide transport and metabolism	--
Serine/threonine-protein phosphatase 2A activator (Fragment) OS=Fasciola gigantica OX=46835 GN=FGIG_08712 PE=3 SV=1	F.gigantica	tr|A0A504YMG7|A0A504YMG7_FASGI	1	1	5.435	368	40820.5	--	--	--	--	--
Glutathione synthetase OS=Fasciola gigantica OX=46835 GN=FGIG_07009 PE=3 SV=1	F.gigantica	tr|A0A504Y6E5|A0A504Y6E5_FASGI	1	1	2.74	511	58108.3	--	--	--	--	Cysteine and methionine metabolism; Glutathione metabolism; Biosynthesis of cofactors; Metabolic pathways
Myophilin OS=Fasciola gigantica OX=46835 GN=FGIG_06586 PE=3 SV=1	F.gigantica	tr|A0A504YEK6|A0A504YEK6_FASGI	1	1	8.108	222	25159.5	cellular process	--	--	--	--
Hydroxyacylglutathione mitochondrial OS=Fasciola gigantica OX=46835 GN=FGIG_03061 PE=3 SV=1	F.gigantica	tr|A0A504YWQ6|A0A504YWQ6_FASGI	1	1	4.981	261	28960.9	reproductive process;metabolic process;developmental process;cellular process	cellular anatomical entity	catalytic activity	General function prediction only	Metabolic pathways; Pyruvate metabolism
Eukaryotic translation initiation factor 5A OS=Fasciola gigantica OX=46835 GN=FGIG_02894 PE=3 SV=1	F.gigantica	tr|A0A504YWG8|A0A504YWG8_FASGI	1	1	6.452	186	20646.1	response to stimulus;reproductive process;developmental process;cellular process;localization;biological regulation;metabolic process	cellular anatomical entity;protein-containing complex	binding;translation regulator activity	Translation, ribosomal structure and biogenesis	--
Cardiac muscle alpha actin OS=Fasciola gigantica OX=46835 GN=FGIG_11050 PE=3 SV=1	F.gigantica	tr|A0A504YYH3|A0A504YYH3_FASGI	14	2	35.2	375	41696.3	--	cellular anatomical entity	binding	Cytoskeleton	Hippo signaling pathway - fly; Phototransduction - fly; Phagosome
Prostaglandin e synthase OS=Fasciola gigantica OX=46835 GN=FGIG_11053 PE=3 SV=1	F.gigantica	tr|A0A504YPM3|A0A504YPM3_FASGI	1	1	8.586	198	22270.3	--	--	--	--	Metabolic pathways; Arachidonic acid metabolism
Ras protein Ral-A OS=Fasciola gigantica OX=46835 GN=FGIG_02617 PE=4 SV=1	F.gigantica	tr|A0A504YMJ1|A0A504YMJ1_FASGI	2	2	16.13	155	17529	localization;developmental process;biological regulation;response to stimulus;locomotion;immune system process;cellular process;biological process involved in interspecies interaction between organisms;reproductive process	cellular anatomical entity	binding;catalytic activity	--	--
Vinculin OS=Fasciola gigantica OX=46835 GN=FGIG_02177 PE=3 SV=1	F.gigantica	tr|A0A504YMY0|A0A504YMY0_FASGI	1	1	1.278	939	104203	localization;cellular process;developmental process;biological adhesion	cellular anatomical entity	binding	--	--
Arf-GAP with dual PH domain-containing protein 1 OS=Fasciola gigantica OX=46835 GN=FGIG_03771 PE=4 SV=1	F.gigantica	tr|A0A504Y890|A0A504Y890_FASGI	3	3	8	400	45557.4	--	--	--	--	--
Multidrug resistance protein 1 (Fragment) OS=Fasciola gigantica OX=46835 GN=FGIG_05063 PE=4 SV=1	F.gigantica	tr|A0A504YSZ7|A0A504YSZ7_FASGI	1	1	1.524	1181	129723	localization;developmental process;multicellular organismal process;biological regulation;response to stimulus;immune system process;cellular process;rhythmic process;reproductive process	cellular anatomical entity	transporter activity;ATP-dependent activity;binding	--	ABC transporters
Dipeptidyl peptidase 2 (Fragment) OS=Fasciola gigantica OX=46835 GN=FGIG_13996 PE=3 SV=1	F.gigantica	tr|A0A504YXR1|A0A504YXR1_FASGI	2	2	4.251	447	50424	metabolic process	cellular anatomical entity	catalytic activity	--	--
Putative glucosidase ii catalytic alpha subunit OS=Fasciola gigantica OX=46835 GN=FGIG_07717 PE=3 SV=1	F.gigantica	tr|A0A504WUZ7|A0A504WUZ7_FASGI	1	1	3.509	342	39144.2	cellular process;metabolic process	protein-containing complex;cellular anatomical entity	catalytic activity;binding	Carbohydrate transport and metabolism	N-Glycan biosynthesis; Metabolic pathways; Protein processing in endoplasmic reticulum
Rab GDP dissociation inhibitor (Fragment) OS=Fasciola gigantica OX=46835 GN=FGIG_12698 PE=3 SV=1	F.gigantica	tr|A0A504YC55|A0A504YC55_FASGI	5	1	31.11	180	20115.3	biological regulation;multicellular organismal process;developmental process;cellular process;reproduction	cellular anatomical entity	molecular function regulator;catalytic activity	--	--
Programmed cell death 6-interacting protein OS=Fasciola gigantica OX=46835 GN=FGIG_11343 PE=4 SV=1	F.gigantica	tr|A0A504YLN3|A0A504YLN3_FASGI	1	1	12.24	98	10840.3	--	--	--	--	Endocytosis
Rho gtp-binding protein rhoc OS=Fasciola gigantica OX=46835 GN=FGIG_06759 PE=4 SV=1	F.gigantica	tr|A0A504YLF6|A0A504YLF6_FASGI	2	2	10.94	192	21889.1	biological regulation;localization;developmental process;cellular process;locomotion	cellular anatomical entity	binding	--	mTOR signaling pathway; Wnt signaling pathway; TGF-beta signaling pathway; Endocytosis
Uncharacterized protein OS=Fasciola gigantica OX=46835 GN=FGIG_02706 PE=4 SV=1	F.gigantica	tr|A0A504YFQ1|A0A504YFQ1_FASGI	1	1	1.269	1340	145309	--	--	--	--	--
Retinol dehydrogenase 11 OS=Fasciola gigantica OX=46835 GN=FGIG_10053 PE=4 SV=1	F.gigantica	tr|A0A504YMM7|A0A504YMM7_FASGI	1	1	8.075	322	35683.6	--	--	--	General function prediction only;Lipid transport and metabolism	Biosynthesis of cofactors; Metabolic pathways; Retinol metabolism
Calnexin OS=Fasciola gigantica OX=46835 GN=FGIG_11331 PE=3 SV=1	F.gigantica	tr|A0A504YRX2|A0A504YRX2_FASGI	1	1	1.613	620	70070	developmental process;immune system process;cellular process;localization	cellular anatomical entity	binding	--	Protein processing in endoplasmic reticulum; Phagosome
Putative oxidoreductase YjmC (Fragment) OS=Fasciola gigantica OX=46835 GN=FGIG_05062 PE=4 SV=1	F.gigantica	tr|A0A504Z4X6|A0A504Z4X6_FASGI	1	1	12.37	186	20126.9	--	--	catalytic activity	Energy production and conversion	--
Serine/threonine-protein phosphatase CPPED1 OS=Fasciola gigantica OX=46835 GN=FGIG_02876 PE=4 SV=1	F.gigantica	tr|A0A504YHF5|A0A504YHF5_FASGI	2	2	11.46	314	35760.8	--	--	--	Signal transduction mechanisms	--
Peptidase_M1_N domain-containing protein OS=Fasciola gigantica OX=46835 GN=FGIG_08037 PE=4 SV=1	F.gigantica	tr|A0A504YFS4|A0A504YFS4_FASGI	1	1	13.77	138	15523.8	--	--	catalytic activity	Amino acid transport and metabolism	--
Acyl protein thioesterase 1 OS=Fasciola gigantica OX=46835 GN=FGIG_05013 PE=3 SV=1	F.gigantica	tr|A0A504YHF7|A0A504YHF7_FASGI	1	1	9.205	239	25782.2	--	--	--	General function prediction only	--
Ubiquitin-conjugating enzyme E2 Z OS=Fasciola gigantica OX=46835 GN=FGIG_04311 PE=4 SV=1	F.gigantica	tr|A0A504Z0A7|A0A504Z0A7_FASGI	1	1	4.015	274	31106	cellular process;metabolic process	cellular anatomical entity	catalytic activity;binding	--	Ubiquitin mediated proteolysis
ATP-dependent (S)-NAD(P)H-hydrate dehydratase OS=Fasciola gigantica OX=46835 GN=FGIG_10900 PE=3 SV=1	F.gigantica	tr|A0A504Y7T8|A0A504Y7T8_FASGI	1	1	4.502	311	33980.6	metabolic process;cellular process	cellular anatomical entity	catalytic activity;binding	Lipid transport and metabolism	--
Citrate synthase OS=Fasciola gigantica OX=46835 GN=FGIG_04349 PE=3 SV=1	F.gigantica	tr|A0A504YU17|A0A504YU17_FASGI	1	1	2.132	469	51654.5	response to stimulus;metabolic process	cellular anatomical entity	binding;catalytic activity	Energy production and conversion	Glyoxylate and dicarboxylate metabolism; Citrate cycle (TCA cycle); 2-Oxocarboxylic acid metabolism; Metabolic pathways; Carbon metabolism; Biosynthesis of amino acids
Calcium-transporting ATPase OS=Fasciola gigantica OX=46835 GN=FGIG_00477 PE=3 SV=1	F.gigantica	tr|A0A504YYL9|A0A504YYL9_FASGI	1	1	2.02	693	75556.4	reproductive process;cellular process;response to stimulus;locomotion;developmental process;localization;biological regulation;multicellular organismal process	cellular anatomical entity;protein-containing complex	transporter activity;molecular function regulator;ATP-dependent activity;binding	Inorganic ion transport and metabolism	--
Annexin OS=Fasciola gigantica OX=46835 GN=FGIG_04110 PE=3 SV=1	F.gigantica	tr|A0A504YP52|A0A504YP52_FASGI	1	1	1.754	912	101352	localization;cellular process;response to stimulus	cellular anatomical entity	binding	--	--
Legumain like OS=Fasciola gigantica OX=46835 GN=FGIG_02693 PE=3 SV=1	F.gigantica	tr|A0A504YCT9|A0A504YCT9_FASGI	1	1	2.278	439	49585.9	metabolic process	--	catalytic activity	Amino acid transport and metabolism;Posttranslational modification, protein turnover, chaperones	Lysosome
Malate dehydrogenase OS=Fasciola gigantica OX=46835 GN=FGIG_12658 PE=4 SV=1	F.gigantica	tr|A0A504Z4Z6|A0A504Z4Z6_FASGI	1	1	10.08	119	13203	--	--	--	Energy production and conversion	--
Rab family other OS=Fasciola gigantica OX=46835 GN=FGIG_05770 PE=4 SV=1	F.gigantica	tr|A0A504YS48|A0A504YS48_FASGI	1	1	33.71	89	10133.6	metabolic process;biological regulation;localization;cellular process;response to stimulus	cellular anatomical entity	binding;catalytic activity	--	--
Putative rna polymerase ii transcription elongation factor elongin/siii subunit elongin b OS=Fasciola gigantica OX=46835 GN=FGIG_06007 PE=4 SV=1	F.gigantica	tr|A0A504YIH8|A0A504YIH8_FASGI	1	1	17.6	125	14040.2	biological regulation;metabolic process;multicellular organismal process;cellular process;developmental process;response to stimulus	protein-containing complex;cellular anatomical entity	binding;transcription regulator activity;catalytic activity	--	Ubiquitin mediated proteolysis
Hsp90 chaperone protein kinase-targeting subunit OS=Fasciola gigantica OX=46835 GN=FGIG_06220 PE=3 SV=1	F.gigantica	tr|A0A504Z2F6|A0A504Z2F6_FASGI	1	1	2.494	401	46666.5	cellular process;localization;biological regulation;response to stimulus	protein-containing complex;cellular anatomical entity	catalytic activity;binding;molecular function regulator	--	--
Tegumental protein OS=Fasciola gigantica OX=46835 GN=FGIG_00354 PE=4 SV=1	F.gigantica	tr|A0A504Y835|A0A504Y835_FASGI	1	1	9.195	174	20172.7	--	--	--	--	--
Succinate dehydrogenase [ubiquinone] iron-sulfur subunit, mitochondrial (Fragment) OS=Fasciola gigantica OX=46835 GN=FGIG_09770 PE=3 SV=1	F.gigantica	tr|A0A504YRX6|A0A504YRX6_FASGI	2	2	9.583	240	27838.2	cellular process;localization;metabolic process	protein-containing complex;cellular anatomical entity	catalytic activity;binding	Energy production and conversion	Carbon metabolism; Metabolic pathways; Oxidative phosphorylation; Citrate cycle (TCA cycle)
Receptor expression-enhancing protein OS=Fasciola gigantica OX=46835 GN=FGIG_09953 PE=3 SV=1	F.gigantica	tr|A0A504YLC6|A0A504YLC6_FASGI	1	1	17.5	120	13771.9	--	cellular anatomical entity	binding	--	--
NEDD8-activating enzyme E1 regulatory subunit OS=Fasciola gigantica OX=46835 GN=FGIG_00893 PE=3 SV=1	F.gigantica	tr|A0A504YIW4|A0A504YIW4_FASGI	2	2	2.508	638	71935.2	biological regulation;cellular process	--	binding;catalytic activity	--	--
Methylmalonyl-CoA epimerase /ethylmalonyl-CoA epimerase OS=Fasciola gigantica OX=46835 GN=FGIG_09463 PE=3 SV=1	F.gigantica	tr|A0A504YLH9|A0A504YLH9_FASGI	1	1	10	150	16273.6	cellular process;metabolic process	cellular anatomical entity	catalytic activity;binding	Secondary metabolites biosynthesis, transport and catabolism;General function prediction only;Amino acid transport and metabolism	Glyoxylate and dicarboxylate metabolism; Valine, leucine and isoleucine degradation; Metabolic pathways; Propanoate metabolism; Carbon metabolism
Uncharacterized protein OS=Fasciola gigantica OX=46835 GN=FGIG_10587 PE=4 SV=1	F.gigantica	tr|A0A504YPR0|A0A504YPR0_FASGI	1	1	12.96	108	12530.6	--	--	--	--	--
Starch branching enzyme ii OS=Fasciola gigantica OX=46835 GN=FGIG_10777 PE=4 SV=1	F.gigantica	tr|A0A504YRQ3|A0A504YRQ3_FASGI	1	1	1.982	555	64424.9	multicellular organismal process;metabolic process;cellular process	cellular anatomical entity	catalytic activity;binding	Carbohydrate transport and metabolism	Metabolic pathways; Starch and sucrose metabolism
Dysferlin limb girdle muscular dystrophy 2B OS=Fasciola gigantica OX=46835 GN=FGIG_08768 PE=4 SV=1	F.gigantica	tr|A0A504YLF9|A0A504YLF9_FASGI	2	2	10.36	251	28564.9	response to stimulus;cellular process;developmental process;multicellular organismal process	cellular anatomical entity	binding	--	--
AKAP7_NLS domain-containing protein OS=Fasciola gigantica OX=46835 GN=FGIG_00306 PE=4 SV=1	F.gigantica	tr|A0A504X4V1|A0A504X4V1_FASGI	1	1	4.582	371	43567.1	--	--	--	--	--
Uncharacterized protein (Fragment) OS=Fasciola gigantica OX=46835 GN=FGIG_03525 PE=4 SV=1	F.gigantica	tr|A0A504YQI2|A0A504YQI2_FASGI	1	1	7.471	174	19624.3	--	--	--	--	--
Cullin-associated and neddylation-dissociated protein 1 OS=Fasciola gigantica OX=46835 GN=FGIG_04346 PE=3 SV=1	F.gigantica	tr|A0A504YTD9|A0A504YTD9_FASGI	1	1	5.932	236	25910.6	developmental process;cellular process;biological regulation;metabolic process	cellular anatomical entity;protein-containing complex	binding	--	--
Heterogeneous nuclear ribonucleoprotein K OS=Fasciola gigantica OX=46835 GN=FGIG_09309 PE=4 SV=1	F.gigantica	tr|A0A504Y8A1|A0A504Y8A1_FASGI	1	1	8.974	312	32354.5	--	--	--	--	Spliceosome
Dynein light chain OS=Fasciola gigantica OX=46835 GN=FGIG_11504 PE=3 SV=1	F.gigantica	tr|A0A504YTL8|A0A504YTL8_FASGI	1	1	13.48	89	10340.8	cellular process;immune system process;localization;metabolic process;biological regulation	cellular anatomical entity;protein-containing complex	cytoskeletal motor activity;binding	--	Salmonella infection
Gynecophoral canal protein OS=Fasciola gigantica OX=46835 GN=FGIG_02457 PE=4 SV=1	F.gigantica	tr|A0A504Z8C5|A0A504Z8C5_FASGI	1	1	2.976	504	57046.9	--	--	--	--	--
Myosin-XV OS=Fasciola gigantica OX=46835 GN=FGIG_03967 PE=3 SV=1	F.gigantica	tr|A0A504Z065|A0A504Z065_FASGI	1	1	0.7004	1999	225821	--	--	--	--	--
Cullin-1 OS=Fasciola gigantica OX=46835 GN=FGIG_09784 PE=3 SV=1	F.gigantica	tr|A0A504YQM7|A0A504YQM7_FASGI	1	1	1.382	868	99403.1	metabolic process;biological regulation;cellular process;developmental process;immune system process;response to stimulus	protein-containing complex;cellular anatomical entity	catalytic activity;binding	--	Hedgehog signaling pathway; Oocyte meiosis; Wnt signaling pathway; Ubiquitin mediated proteolysis; Cell cycle; TGF-beta signaling pathway; Protein processing in endoplasmic reticulum
Ras protein Rab-5C OS=Fasciola gigantica OX=46835 GN=FGIG_12164 PE=4 SV=1	F.gigantica	tr|A0A504XMC1|A0A504XMC1_FASGI	1	1	15.2	125	14074.1	immune system process;cellular process;localization;biological regulation	cellular anatomical entity	catalytic activity;binding	--	--
Cullin-domain-containing protein OS=Fasciola gigantica OX=46835 GN=FGIG_11337 PE=3 SV=1	F.gigantica	tr|A0A504YPQ5|A0A504YPQ5_FASGI	1	1	2.672	524	60798.2	reproductive process;response to stimulus;cellular process;developmental process;metabolic process;biological regulation	protein-containing complex;cellular anatomical entity	binding	--	Ubiquitin mediated proteolysis; Nucleotide excision repair
SOCS box domain-containing protein OS=Fasciola gigantica OX=46835 GN=FGIG_02852 PE=4 SV=1	F.gigantica	tr|A0A504Z3E6|A0A504Z3E6_FASGI	1	1	3.302	424	49024.6	--	--	--	--	--
Basement membrane-specific heparan sulfate proteoglycan core protein OS=Fasciola gigantica OX=46835 GN=FGIG_04893 PE=4 SV=1	F.gigantica	tr|A0A504YLF0|A0A504YLF0_FASGI	1	1	1.675	836	94413.1	--	--	--	--	--
Thimet oligopeptidase (M03 family) OS=Fasciola gigantica OX=46835 GN=FGIG_08125 PE=3 SV=1	F.gigantica	tr|A0A504YVZ5|A0A504YVZ5_FASGI	1	1	6.593	182	21442.7	biological regulation;metabolic process;cellular process	--	binding;catalytic activity	Posttranslational modification, protein turnover, chaperones	--
SUMO-conjugating enzyme OS=Fasciola gigantica OX=46835 GN=FGIG_01036 PE=3 SV=1	F.gigantica	tr|A0A504YQU8|A0A504YQU8_FASGI	2	2	19.57	138	16123.4	reproductive process;cellular process;immune system process;response to stimulus;locomotion;developmental process;localization;biological regulation;metabolic process;multicellular organismal process	protein-containing complex;cellular anatomical entity	catalytic activity;binding	--	Nucleocytoplasmic transport; Ubiquitin mediated proteolysis
Leucine amino peptidase OS=Fasciola gigantica OX=46835 PE=2 SV=1	F.gigantica	tr|C6KGZ9|C6KGZ9_FASGI	26	1	51.24	523	56384.1	metabolic process	cellular anatomical entity	binding;catalytic activity	Amino acid transport and metabolism	Metabolic pathways; Glutathione metabolism
Multi-domain cystatin OS=Fasciola gigantica OX=46835 GN=FGIG_02520 PE=4 SV=1	F.gigantica	tr|A0A504ZA07|A0A504ZA07_FASGI	23	1	23.18	1083	124545	biological regulation	--	molecular function regulator	--	--
Putative pyridine nucleotide-disulfide oxidoreductase OS=Fasciola gigantica OX=46835 GN=FGIG_02962 PE=3 SV=1	F.gigantica	tr|A0A504YZM6|A0A504YZM6_FASGI	11	1	33.27	541	60473.2	metabolic process;biological regulation;cellular process;response to stimulus	cellular anatomical entity	antioxidant activity;binding;catalytic activity	Energy production and conversion	Selenocompound metabolism
Adenosylhomocysteinase OS=Fasciola gigantica OX=46835 GN=FGIG_02822 PE=3 SV=1	F.gigantica	tr|A0A504YVD3|A0A504YVD3_FASGI	4	2	11.34	432	47878.5	response to stimulus;cellular process;behavior;immune system process;metabolic process;rhythmic process	cellular anatomical entity	catalytic activity;binding	Coenzyme transport and metabolism	Cysteine and methionine metabolism; Metabolic pathways
Myoferlin OS=Fasciola gigantica OX=46835 GN=FGIG_10120 PE=4 SV=1	F.gigantica	tr|A0A504YZZ6|A0A504YZZ6_FASGI	1	1	2.037	540	62272.8	response to stimulus;cellular process;biological regulation;multicellular organismal process	cellular anatomical entity	binding	--	--
Nuclear migration protein nudc OS=Fasciola gigantica OX=46835 GN=FGIG_08789 PE=4 SV=1	F.gigantica	tr|A0A504YU67|A0A504YU67_FASGI	1	1	4.082	294	34055.7	response to stimulus;cellular process;localization;multicellular organismal process	cellular anatomical entity	binding	--	--
Cathepsin D OS=Fasciola gigantica OX=46835 PE=2 SV=1; Cathepsin d lysosomal aspartyl protease OS=Fasciola gigantica OX=46835 GN=FGIG_10094 PE=3 SV=1	F.gigantica	tr|F6M3U5|F6M3U5_FASGI;tr|A0A504YJA8|A0A504YJA8_FASGI	1	1	2.331	429	47149.9	metabolic process	cellular anatomical entity	catalytic activity	--	Lysosome; Autophagy - animal
Glutamyl aminopeptidase OS=Fasciola gigantica OX=46835 GN=FGIG_01288 PE=3 SV=1	F.gigantica	tr|A0A504Z336|A0A504Z336_FASGI	1	1	1.245	1044	121097	multicellular organismal process;metabolic process;cellular process	cellular anatomical entity	binding;catalytic activity	Amino acid transport and metabolism	Glutathione metabolism; Metabolic pathways
Nudix (Nucleoside diphosphate linked moiety X)-type motif 9 OS=Fasciola gigantica OX=46835 GN=FGIG_03076 PE=4 SV=1	F.gigantica	tr|A0A504YYY4|A0A504YYY4_FASGI	1	1	3.356	298	33989.9	metabolic process;localization;cellular process	cellular anatomical entity	catalytic activity;transporter activity	Nucleotide transport and metabolism	Purine metabolism; Metabolic pathways
Programmed cell death 6-interacting protein OS=Fasciola gigantica OX=46835 GN=FGIG_11797 PE=4 SV=1	F.gigantica	tr|A0A504YYX2|A0A504YYX2_FASGI	1	1	12.42	153	17779.8	--	--	--	--	Endocytosis
WW domain-binding protein 2 OS=Fasciola gigantica OX=46835 GN=FGIG_07734 PE=4 SV=1	F.gigantica	tr|A0A504YUC6|A0A504YUC6_FASGI	1	1	4.153	313	33389.1	biological regulation;cellular process	cellular anatomical entity	--	--	--
FAD_binding_6 domain-containing protein OS=Fasciola gigantica OX=46835 GN=FGIG_10267 PE=4 SV=1	F.gigantica	tr|A0A504Z3H2|A0A504Z3H2_FASGI	1	1	6.557	183	19928.8	metabolic process;localization;cellular process	cellular anatomical entity	binding	--	Amino sugar and nucleotide sugar metabolism
Actin-related protein 2 OS=Fasciola gigantica OX=46835 GN=FGIG_09590 PE=3 SV=1	F.gigantica	tr|A0A504Z168|A0A504Z168_FASGI	2	2	24.9	241	26910.9	cellular process;immune system process;reproductive process;biological regulation;metabolic process;multicellular organismal process;developmental process;behavior;localization;response to stimulus;locomotion	cellular anatomical entity;protein-containing complex	structural molecule activity;catalytic activity;binding	Cytoskeleton	Regulation of actin cytoskeleton; Salmonella infection; Endocytosis; Tight junction
Equilibrative nucleoside transporter 1 OS=Fasciola gigantica OX=46835 GN=FGIG_01169 PE=3 SV=1	F.gigantica	tr|A0A504YCJ0|A0A504YCJ0_FASGI	1	1	4.412	476	52919.4	response to stimulus;multicellular organismal process;biological regulation;localization;cellular process	cellular anatomical entity	--	--	--
Trafficking protein particle complex subunit OS=Fasciola gigantica OX=46835 GN=FGIG_01259 PE=3 SV=1	F.gigantica	tr|A0A504Y8L2|A0A504Y8L2_FASGI	1	1	6.452	186	20710.3	--	--	--	--	--
Dynein light chain 1 cytoplasmic OS=Fasciola gigantica OX=46835 GN=FGIG_04468 PE=4 SV=1	F.gigantica	tr|A0A504YUK0|A0A504YUK0_FASGI	1	1	6.989	186	21774.5	--	--	--	--	--
Pyridoxal kinase OS=Fasciola gigantica OX=46835 GN=FGIG_10761 PE=3 SV=1	F.gigantica	tr|A0A504YJM9|A0A504YJM9_FASGI	1	1	5.96	302	33515.8	--	--	--	Coenzyme transport and metabolism	Vitamin B6 metabolism; Metabolic pathways; Biosynthesis of cofactors
Putative mediator of cell motility 1 OS=Fasciola gigantica OX=46835 GN=FGIG_08836 PE=3 SV=1	F.gigantica	tr|A0A504YHB5|A0A504YHB5_FASGI	1	1	5.346	318	36463.1	biological regulation	cellular anatomical entity	binding	--	--
Ras protein Rab-5C OS=Fasciola gigantica OX=46835 GN=FGIG_12599 PE=4 SV=1	F.gigantica	tr|A0A504Y9X4|A0A504Y9X4_FASGI	1	1	15.07	73	7859	--	--	--	--	--
Uncharacterized protein OS=Fasciola gigantica OX=46835 GN=FGIG_07788 PE=4 SV=1	F.gigantica	tr|A0A504Y7T1|A0A504Y7T1_FASGI	2	2	2.466	446	49615.8	--	--	--	--	--
Uncharacterized protein OS=Fasciola gigantica OX=46835 GN=FGIG_08250 PE=4 SV=1	F.gigantica	tr|A0A504YJ58|A0A504YJ58_FASGI	1	1	22.08	77	8840.2	--	--	--	--	--
Pyruvate kinase OS=Fasciola gigantica OX=46835 GN=FGIG_07077 PE=3 SV=1	F.gigantica	tr|A0A504Y630|A0A504Y630_FASGI	1	1	1.933	569	62169.7	response to stimulus;metabolic process;developmental process;cellular process	cellular anatomical entity	catalytic activity;binding	Signal transduction mechanisms;Carbohydrate transport and metabolism	Glycolysis / Gluconeogenesis; Biosynthesis of cofactors; Metabolic pathways; Biosynthesis of amino acids; Carbon metabolism; Pyruvate metabolism
T-complex protein 1 subunit delta OS=Fasciola gigantica OX=46835 GN=FGIG_01563 PE=3 SV=1	F.gigantica	tr|A0A504YLW7|A0A504YLW7_FASGI	1	1	2.407	540	58291.9	response to stimulus;reproductive process;localization;developmental process;cellular process	protein-containing complex;cellular anatomical entity	binding	Posttranslational modification, protein turnover, chaperones	--
Eukaryotic polypeptide chain release factor 3 OS=Fasciola gigantica OX=46835 GN=FGIG_12020 PE=4 SV=1	F.gigantica	tr|A0A504YDN6|A0A504YDN6_FASGI	1	1	3.048	525	57960.1	cellular process;biological regulation;metabolic process	protein-containing complex	catalytic activity;translation regulator activity;binding	Translation, ribosomal structure and biogenesis	mRNA surveillance pathway
Phosphate carrier protein, mitochondrial OS=Fasciola gigantica OX=46835 GN=FGIG_02291 PE=3 SV=1	F.gigantica	tr|A0A504Z057|A0A504Z057_FASGI	2	2	7.619	315	35076.9	localization;cellular process;metabolic process	cellular anatomical entity	binding;structural molecule activity;transporter activity	--	--
Glucose-6-phosphate 1-dehydrogenase OS=Fasciola gigantica OX=46835 GN=FGIG_12117 PE=4 SV=1	F.gigantica	tr|A0A504YF98|A0A504YF98_FASGI	1	1	3.766	239	26927.7	metabolic process	--	catalytic activity;binding	Carbohydrate transport and metabolism	Pentose phosphate pathway; Glutathione metabolism; Carbon metabolism; Metabolic pathways
Ubiquitin-conjugating enzyme E2 g OS=Fasciola gigantica OX=46835 GN=FGIG_05952 PE=3 SV=1	F.gigantica	tr|A0A504Z274|A0A504Z274_FASGI	1	1	11.31	168	19346.7	metabolic process;cellular process	cellular anatomical entity	catalytic activity;binding	--	Ubiquitin mediated proteolysis; Protein processing in endoplasmic reticulum
Uncharacterized protein OS=Fasciola gigantica OX=46835 GN=FGIG_00351 PE=4 SV=1	F.gigantica	tr|A0A504Y465|A0A504Y465_FASGI	2	2	13.01	146	17499.2	--	--	--	--	--
Fatty acid amide hydrolase OS=Fasciola gigantica OX=46835 GN=FGIG_11488 PE=3 SV=1	F.gigantica	tr|A0A504YWT2|A0A504YWT2_FASGI	1	1	3.089	259	28043.4	--	--	--	Translation, ribosomal structure and biogenesis	--
Nicotinamide phosphoribosyltransferase OS=Fasciola gigantica OX=46835 GN=FGIG_11631 PE=4 SV=1	F.gigantica	tr|A0A504YI31|A0A504YI31_FASGI	1	1	6.019	216	24876.3	rhythmic process;multi-organism process;cellular process;signaling;reproductive process;metabolic process;biological regulation;multicellular organismal process;developmental process;response to stimulus	cellular anatomical entity	catalytic activity;binding;molecular function regulator	Coenzyme transport and metabolism	Nicotinate and nicotinamide metabolism; Metabolic pathways
p25-alpha domain containing protein OS=Fasciola gigantica OX=46835 GN=FGIG_09970 PE=3 SV=1	F.gigantica	tr|A0A504YNN2|A0A504YNN2_FASGI	1	1	7.453	161	18005.1	--	--	--	--	--
Membrane-associated phosphatidylinositol transfer protein 1 OS=Fasciola gigantica OX=46835 GN=FGIG_00740 PE=3 SV=1	F.gigantica	tr|A0A504Z140|A0A504Z140_FASGI	1	1	1.109	1262	140793	--	cellular anatomical entity	binding	Lipid transport and metabolism	--
Programmed cell death protein 6 OS=Fasciola gigantica OX=46835 GN=FGIG_10985 PE=4 SV=1	F.gigantica	tr|A0A504YSV3|A0A504YSV3_FASGI	1	1	11.18	170	19718.5	--	--	--	--	--
Glycerol-3-phosphate dehydrogenase [NAD(+)] OS=Fasciola gigantica OX=46835 GN=FGIG_11179 PE=4 SV=1	F.gigantica	tr|A0A504Y6P8|A0A504Y6P8_FASGI	2	2	13.53	133	14694	cellular process;metabolic process	--	catalytic activity;binding	Energy production and conversion	Glycerophospholipid metabolism
Trafficking protein particle complex subunit 5 OS=Fasciola gigantica OX=46835 GN=FGIG_08771 PE=3 SV=1	F.gigantica	tr|A0A504Z0Q9|A0A504Z0Q9_FASGI	1	1	4.569	197	22434.6	localization;cellular process;multicellular organismal process	--	--	--	--
Tubulin beta chain OS=Fasciola gigantica OX=46835 GN=FGIG_04371 PE=3 SV=1	F.gigantica	tr|A0A504YC73|A0A504YC73_FASGI	8	2	19.78	445	49860.8	--	--	--	--	Phagosome
Actin-related protein 2/3 complex subunit 3 OS=Fasciola gigantica OX=46835 GN=FGIG_05886 PE=3 SV=1	F.gigantica	tr|A0A504Z187|A0A504Z187_FASGI	1	1	11.76	170	19656.7	cellular process;biological regulation	protein-containing complex;cellular anatomical entity	binding	--	Endocytosis
Vitellogenic cathepsin-B like protease OS=Fasciola gigantica OX=46835 GN=FGIG_08898 PE=3 SV=1	F.gigantica	tr|A0A504Z0F3|A0A504Z0F3_FASGI	1	1	3.245	339	38125.5	biological regulation;metabolic process	--	catalytic activity	Posttranslational modification, protein turnover, chaperones	Lysosome; Autophagy - animal
cAMP-dependent protein kinase type II-alpha regulatory subunit (Fragment) OS=Fasciola gigantica OX=46835 GN=FGIG_12495 PE=3 SV=1	F.gigantica	tr|A0A504YK85|A0A504YK85_FASGI	1	1	4.046	346	39035.3	cellular process;behavior;biological regulation;multicellular organismal process;rhythmic process	cellular anatomical entity	binding	Posttranslational modification, protein turnover, chaperones;Signal transduction mechanisms;Defense mechanisms;Carbohydrate transport and metabolism	--
Glycerophosphocholine phosphodiesterase OS=Fasciola gigantica OX=46835 GN=FGIG_06515 PE=4 SV=1	F.gigantica	tr|A0A504Z3Y7|A0A504Z3Y7_FASGI	2	2	4.174	551	61250.3	--	--	catalytic activity	--	--
Antigen Sm21.7 OS=Fasciola gigantica OX=46835 GN=FGIG_04469 PE=4 SV=1	F.gigantica	tr|A0A504Z3Y4|A0A504Z3Y4_FASGI	1	1	9.827	173	20369	--	--	--	--	--
AP complex subunit beta OS=Fasciola gigantica OX=46835 GN=FGIG_03191 PE=3 SV=1	F.gigantica	tr|A0A504YGE2|A0A504YGE2_FASGI	1	1	2.459	610	66845.5	multicellular organismal process;developmental process;cellular process;localization	protein-containing complex;cellular anatomical entity	binding	--	--
NAD(+) kinase OS=Fasciola gigantica OX=46835 GN=FGIG_04961 PE=3 SV=1	F.gigantica	tr|A0A504YEN6|A0A504YEN6_FASGI	1	1	6.047	215	24246.8	cellular process;metabolic process	cellular anatomical entity	binding;catalytic activity	Coenzyme transport and metabolism	Metabolic pathways; Biosynthesis of cofactors; Nicotinate and nicotinamide metabolism
Uncharacterized protein OS=Fasciola gigantica OX=46835 GN=FGIG_11227 PE=3 SV=1	F.gigantica	tr|A0A504YJ89|A0A504YJ89_FASGI	1	1	8.865	282	29982	response to stimulus;positive regulation of biological process;localization;cellular process;developmental process;multicellular organismal process;biological regulation	cellular anatomical entity	transporter activity	Carbohydrate transport and metabolism	--
Uncharacterized protein OS=Fasciola gigantica OX=46835 GN=FGIG_06060 PE=4 SV=1	F.gigantica	tr|A0A504YRU2|A0A504YRU2_FASGI	1	1	7.738	168	18536.1	--	--	--	--	Protein processing in endoplasmic reticulum
Dysferlin limb girdle muscular dystrophy 2B (Autosomal recessive) OS=Fasciola gigantica OX=46835 GN=FGIG_11072 PE=4 SV=1	F.gigantica	tr|A0A504YK58|A0A504YK58_FASGI	1	1	4.592	196	22700.5	response to stimulus;cellular process;biological regulation	cellular anatomical entity	binding	--	--
26S proteasome non-ATPase regulatory subunit 5 OS=Fasciola gigantica OX=46835 GN=FGIG_02649 PE=3 SV=1	F.gigantica	tr|A0A504YVU7|A0A504YVU7_FASGI	1	1	2.926	581	64452.8	--	--	--	--	--
Major vault protein OS=Fasciola gigantica OX=46835 GN=FGIG_01701 PE=4 SV=1	F.gigantica	tr|A0A504Y9P3|A0A504Y9P3_FASGI	1	1	1.91	890	99761.6	cellular process;developmental process;localization;biological regulation;response to stimulus	protein-containing complex;cellular anatomical entity	binding	--	--
Actin-related protein 2/3 complex subunit 5 OS=Fasciola gigantica OX=46835 GN=FGIG_02850 PE=3 SV=1	F.gigantica	tr|A0A504Z270|A0A504Z270_FASGI	1	1	10.43	163	18428.9	locomotion;biological regulation;cellular process;developmental process;immune system process	protein-containing complex;cellular anatomical entity	structural molecule activity;binding	--	Endocytosis
NADP-dependent glycerol dehydrogenase OS=Fasciola gigantica OX=46835 GN=FGIG_05761 PE=4 SV=1	F.gigantica	tr|A0A504Z1S1|A0A504Z1S1_FASGI	1	1	3.604	333	37545.1	--	--	catalytic activity	Secondary metabolites biosynthesis, transport and catabolism	Fructose and mannose metabolism; Glycerolipid metabolism; Pentose and glucuronate interconversions; Galactose metabolism; Metabolic pathways; Folate biosynthesis
Uncharacterized protein OS=Fasciola gigantica OX=46835 GN=FGIG_06443 PE=4 SV=1	F.gigantica	tr|A0A504YVV3|A0A504YVV3_FASGI	1	1	9.783	92	10705.3	reproductive process;response to stimulus;biological regulation;multicellular organismal process;developmental process;cellular process;localization	protein-containing complex;cellular anatomical entity	binding;structural molecule activity	--	Salmonella infection; Endocytosis; Regulation of actin cytoskeleton; Yersinia infection; Tight junction; Fc gamma R-mediated phagocytosis; Bacterial invasion of epithelial cells
Cytoplasmic actin OS=Fasciola gigantica OX=46835 GN=FGIG_11109 PE=3 SV=1	F.gigantica	tr|A0A504Y6H5|A0A504Y6H5_FASGI	20	3	58.78	376	41645.2	growth;locomotion;reproductive process;localization;developmental process;cellular process;multicellular organismal process	cellular anatomical entity	binding	Cytoskeleton	Salmonella infection; Regulation of actin cytoskeleton; Tight junction; Adherens junction; Phagosome; Apoptosis; Focal adhesion
Major egg antigen OS=Fasciola gigantica OX=46835 GN=FGIG_05270 PE=3 SV=1	F.gigantica	tr|A0A504YFZ6|A0A504YFZ6_FASGI	1	1	3.395	324	37190.5	--	--	--	--	--
Uncharacterized protein OS=Fasciola gigantica OX=46835 GN=FGIG_00713 PE=4 SV=1	F.gigantica	tr|A0A504Y7D7|A0A504Y7D7_FASGI	1	1	4.305	302	33295.1	--	--	--	--	--

## Sheet: A2W7
Names	Species	Acc	#Peptide	#Unique Peptide	Coverage(%)	Length	Mass	GO function(Biological Process)	GO function(Cellular Component)	GO function(Molecular Function)	COG_function	Kegg_function
L-plastin OS=Fasciola gigantica OX=46835 GN=FGIG_03928 PE=4 SV=1	F.gigantica	tr|A0A504YSL7|A0A504YSL7_FASGI	80	80	78.15	650	73873.6	reproductive process;cellular process	cellular anatomical entity	binding	--	--
Alpha-actinin sarcomeric OS=Fasciola gigantica OX=46835 GN=FGIG_01730 PE=4 SV=1	F.gigantica	tr|A0A504WV76|A0A504WV76_FASGI	39	37	69.74	423	49371.2	multicellular organismal process;biological regulation;metabolic process;developmental process;behavior;cellular process;response to stimulus	cellular anatomical entity	structural molecule activity;catalytic activity;binding	--	--
Phosphoenolpyruvate carboxykinase (GTP) OS=Fasciola gigantica OX=46835 GN=FGIG_03867 PE=3 SV=1	F.gigantica	tr|A0A504YUP2|A0A504YUP2_FASGI	37	37	72.36	550	61415.2	metabolic process	cellular anatomical entity	catalytic activity;binding	Energy production and conversion	Metabolic pathways; Glycolysis / Gluconeogenesis; Citrate cycle (TCA cycle); Pyruvate metabolism; FoxO signaling pathway
Glutamate dehydrogenase OS=Fasciola gigantica OX=46835 GN=FGIG_08468 PE=3 SV=1	F.gigantica	tr|A0A504YK79|A0A504YK79_FASGI	32	32	60.67	534	58745	response to stimulus;developmental process;cellular process;behavior;biological regulation;metabolic process;multicellular organismal process	cellular anatomical entity	catalytic activity;binding	Amino acid transport and metabolism	Carbon metabolism; Arginine biosynthesis; Metabolic pathways; Proximal tubule bicarbonate reclamation; Nitrogen metabolism; Alanine, aspartate and glutamate metabolism; Necroptosis
Ubiquitin activating enzyme OS=Fasciola gigantica OX=46835 GN=FGIG_01883 PE=3 SV=1	F.gigantica	tr|A0A504Y452|A0A504Y452_FASGI	27	27	35.1	1077	120430	--	--	--	Inorganic ion transport and metabolism	Ubiquitin mediated proteolysis
Alpha-1,4 glucan phosphorylase OS=Fasciola gigantica OX=46835 GN=FGIG_01694 PE=3 SV=1	F.gigantica	tr|A0A504YK53|A0A504YK53_FASGI	30	30	46.79	840	96630.7	cellular process;metabolic process;biological regulation	cellular anatomical entity	binding;catalytic activity	Carbohydrate transport and metabolism	Metabolic pathways; Starch and sucrose metabolism
Heat shock protein heat shock protein 90 alpha OS=Fasciola gigantica OX=46835 GN=FGIG_08056 PE=3 SV=1	F.gigantica	tr|A0A504YG42|A0A504YG42_FASGI	28	26	45.98	722	82427.7	biological regulation;developmental process;localization;response to stimulus;locomotion;biological process involved in interspecies interaction between organisms;cellular process;immune system process;biological adhesion;reproductive process	cellular anatomical entity	binding;catalytic activity;molecular function regulator	Posttranslational modification, protein turnover, chaperones	Progesterone-mediated oocyte maturation; Antigen processing and presentation; PI3K-Akt signaling pathway; Salmonella infection; Fluid shear stress and atherosclerosis; Prostate cancer; Necroptosis; Pathways in cancer; Estrogen signaling pathway; Chemical carcinogenesis - receptor activation; IL-17 signaling pathway; Lipid and atherosclerosis; NOD-like receptor signaling pathway; Protein processin…
Heat shock protein 70 OS=Fasciola hepatica OX=6192 GN=HSP70 PE=2 SV=1	F.gigantica	tr|B1NI98|B1NI98_FASHE	23	22	33.49	645	70752.1	cellular process;localization;metabolic process;biological regulation	protein-containing complex;cellular anatomical entity	binding;catalytic activity	Posttranslational modification, protein turnover, chaperones	Spliceosome; Endocytosis; Protein processing in endoplasmic reticulum
Alpha-actinin isoform B (Fragment) OS=Fasciola gigantica OX=46835 GN=FGIG_09027 PE=4 SV=1	F.gigantica	tr|A0A504Y787|A0A504Y787_FASGI	26	26	58.48	342	39289.7	response to stimulus;cellular process;localization;biological regulation	protein-containing complex;cellular anatomical entity	binding;transcription regulator activity	--	--
Multi-domain cystatin OS=Fasciola gigantica OX=46835 GN=MDC PE=2 SV=1	F.gigantica	tr|A0A097GX18|A0A097GX18_FASGI	21	2	16.25	1489	170946	biological regulation	--	molecular function regulator	--	--
Leucine amino peptidase OS=Fasciola gigantica OX=46835 PE=2 SV=1	F.gigantica	tr|C6KGZ9|C6KGZ9_FASGI	22	2	51.43	523	56384.1	metabolic process	cellular anatomical entity	binding;catalytic activity	Amino acid transport and metabolism	Glutathione metabolism; Metabolic pathways
Propanoyl-CoA:carbon dioxide ligase subunit alpha OS=Fasciola gigantica OX=46835 GN=FGIG_07092 PE=4 SV=1	F.gigantica	tr|A0A504YJJ4|A0A504YJJ4_FASGI	23	23	38.4	750	82609	metabolic process;cellular process	cellular anatomical entity	catalytic activity;binding	Lipid transport and metabolism	Carbon metabolism; Propanoate metabolism; Metabolic pathways; Glyoxylate and dicarboxylate metabolism; Valine, leucine and isoleucine degradation
Oxoglutarate dehydrogenase (succinyl-transferring) OS=Fasciola gigantica OX=46835 GN=FGIG_04989 PE=3 SV=1	F.gigantica	tr|A0A504Z421|A0A504Z421_FASGI	20	20	25.14	1054	119538	locomotion;developmental process;cellular process;multicellular organismal process;metabolic process	protein-containing complex;cellular anatomical entity	binding;catalytic activity	Energy production and conversion	Metabolic pathways; Carbon metabolism; Citrate cycle (TCA cycle)
Malic enzyme OS=Fasciola gigantica OX=46835 GN=FGIG_09437 PE=3 SV=1	F.gigantica	tr|A0A504YH77|A0A504YH77_FASGI	22	22	46.23	584	63743.6	biological regulation;metabolic process;cellular process;response to stimulus	cellular anatomical entity	catalytic activity;binding	Energy production and conversion	Pyruvate metabolism; Carbon metabolism; Metabolic pathways
Thioredoxin peroxidase 1 OS=Fasciola gigantica OX=46835 GN=TPx-1 PE=2 SV=1; Thiol-specific antioxidant OS=Fasciola gigantica OX=46835 GN=FGIG_06158 PE=4 SV=1	F.gigantica	tr|C7EAA3|C7EAA3_FASGI;tr|A0A504YJL0|A0A504YJL0_FASGI	28	28	71.1	218	24632.9	cellular process;detoxification	cellular anatomical entity	antioxidant activity;catalytic activity	Defense mechanisms	Peroxisome
Severin OS=Fasciola gigantica OX=46835 GN=FGIG_02947 PE=4 SV=1	F.gigantica	tr|A0A504YFI9|A0A504YFI9_FASGI	22	22	55.04	407	47394.3	--	--	--	--	--
6-phosphogluconate dehydrogenase, decarboxylating OS=Fasciola gigantica OX=46835 GN=FGIG_04067 PE=3 SV=1	F.gigantica	tr|A0A504Z133|A0A504Z133_FASGI	22	22	56.77	495	54361.1	metabolic process;cellular process	cellular anatomical entity	catalytic activity;binding	Carbohydrate transport and metabolism	Pentose phosphate pathway; Carbon metabolism; Metabolic pathways; Glutathione metabolism
Propionyl-CoA carboxylase beta chain OS=Fasciola gigantica OX=46835 GN=FGIG_01539 PE=4 SV=1	F.gigantica	tr|A0A504YAE5|A0A504YAE5_FASGI	27	27	55.33	535	58544.9	cellular process;metabolic process	cellular anatomical entity;protein-containing complex	binding;catalytic activity	Lipid transport and metabolism	Glyoxylate and dicarboxylate metabolism; Valine, leucine and isoleucine degradation; Metabolic pathways; Carbon metabolism; Propanoate metabolism
Severin OS=Fasciola gigantica OX=46835 GN=FGIG_09162 PE=4 SV=1	F.gigantica	tr|A0A504Z761|A0A504Z761_FASGI	20	20	55.67	379	43100.3	--	--	--	--	--
EGF-like domain-containing protein OS=Fasciola gigantica OX=46835 GN=FGIG_03998 PE=3 SV=1	F.gigantica	tr|A0A504YQK1|A0A504YQK1_FASGI	20	20	12.48	1987	221530	--	cellular anatomical entity	binding	--	--
Dynein heavy chain 1 cytosolic OS=Fasciola gigantica OX=46835 GN=FGIG_00108 PE=3 SV=1	F.gigantica	tr|A0A504YKS2|A0A504YKS2_FASGI	14	14	4.237	4744	541069	immune system process;cellular process;localization	cellular anatomical entity;protein-containing complex	ATP-dependent activity;catalytic activity;cytoskeletal motor activity;binding	--	Phagosome; Salmonella infection; Vasopressin-regulated water reabsorption
Actin alpha cardiac muscle 1 OS=Fasciola gigantica OX=46835 GN=FGIG_00115 PE=3 SV=1; Actin alpha cardiac muscle 1 OS=Fasciola gigantica OX=46835 GN=FGIG_07271 PE=3 SV=1	F.gigantica	tr|A0A504YKQ2|A0A504YKQ2_FASGI;tr|A0A504YJ32|A0A504YJ32_FASGI	25	8	71.81	376	41771.4	multicellular organismal process;developmental process;cellular process;localization;reproductive process;locomotion;growth	cellular anatomical entity	structural molecule activity;binding	Cytoskeleton	Regulation of actin cytoskeleton; Salmonella infection; Phagosome; Adherens junction; Tight junction; Apoptosis; Focal adhesion
14-3-3 protein OS=Fasciola gigantica OX=46835 PE=2 SV=1	F.gigantica	tr|Q5FX78|Q5FX78_FASGI	20	11	72.62	252	28741.4	response to stimulus;biological adhesion;cellular process;localization;biological regulation	protein-containing complex;cellular anatomical entity	catalytic activity;binding	--	Hepatitis B; Viral carcinogenesis; Cell cycle; Oocyte meiosis; Hepatitis C; Hippo signaling pathway; PI3K-Akt signaling pathway
Paramyosin OS=Fasciola gigantica OX=46835 GN=FGIG_08997 PE=3 SV=1	F.gigantica	tr|A0A504Y9W6|A0A504Y9W6_FASGI	15	15	9.341	2002	230744	cellular process;reproductive process;localization;developmental process;multicellular organismal process;biological regulation;response to stimulus;locomotion	cellular anatomical entity;protein-containing complex	catalytic activity;binding;cytoskeletal motor activity	--	--
Alanine transaminase OS=Fasciola gigantica OX=46835 GN=FGIG_03447 PE=3 SV=1	F.gigantica	tr|A0A504YJK4|A0A504YJK4_FASGI	17	17	45	500	55531.7	cellular process;metabolic process;biological regulation	cellular anatomical entity	catalytic activity;binding	Amino acid transport and metabolism	Metabolic pathways; Carbon metabolism; Arginine biosynthesis; Biosynthesis of amino acids; Alanine, aspartate and glutamate metabolism; 2-Oxocarboxylic acid metabolism
Uncharacterized protein OS=Fasciola gigantica OX=46835 GN=FGIG_02003 PE=4 SV=1	F.gigantica	tr|A0A504YJQ4|A0A504YJQ4_FASGI	18	18	14.02	1605	182663	--	--	--	--	--
Sarcoplasmic calcium-binding protein OS=Fasciola gigantica OX=46835 GN=FGIG_07128 PE=4 SV=1	F.gigantica	tr|A0A504YGP8|A0A504YGP8_FASGI	23	23	53.39	384	44814.8	--	--	binding	--	--
Glutathione transferase OS=Fasciola gigantica OX=46835 GN=gst-1 PE=2 SV=1	F.gigantica	tr|Q9XYL9|Q9XYL9_FASGI	19	18	71.1	218	25337	metabolic process	cellular anatomical entity	catalytic activity	--	Drug metabolism - other enzymes; Chemical carcinogenesis - receptor activation; Glutathione metabolism; Pathways in cancer; Chemical carcinogenesis - DNA adducts; Metabolic pathways; Metabolism of xenobiotics by cytochrome P450; Chemical carcinogenesis - reactive oxygen species; Drug metabolism - cytochrome P450; Platinum drug resistance; Fluid shear stress and atherosclerosis; Hepatocellular car…
Glyceraldehyde-3-phosphate dehydrogenase OS=Fasciola gigantica OX=46835 GN=FGIG_06798 PE=3 SV=1	F.gigantica	tr|A0A504YCL4|A0A504YCL4_FASGI	17	17	70.92	337	36542.6	metabolic process;cellular process	--	catalytic activity;binding	Carbohydrate transport and metabolism	Carbon metabolism; Biosynthesis of amino acids; Metabolic pathways; Glycolysis / Gluconeogenesis; Salmonella infection
Protein disulfide-isomerase OS=Fasciola gigantica OX=46835 GN=FGIG_01161 PE=3 SV=1	F.gigantica	tr|A0A504Z0Y0|A0A504Z0Y0_FASGI	14	14	32.11	489	55181.4	response to stimulus;biological regulation;cellular process	protein-containing complex;cellular anatomical entity	binding;catalytic activity	Posttranslational modification, protein turnover, chaperones	Protein processing in endoplasmic reticulum
Glutathione S-transferase sigma class OS=Fasciola gigantica OX=46835 PE=2 SV=1	F.gigantica	tr|K7Z2A9|K7Z2A9_FASGI	17	17	72.04	211	24595.3	--	--	catalytic activity	--	Arachidonic acid metabolism; Glutathione metabolism; Metabolic pathways; Metabolism of xenobiotics by cytochrome P450; Drug metabolism - cytochrome P450
Uncharacterized protein OS=Fasciola gigantica OX=46835 GN=FGIG_08354 PE=4 SV=1	F.gigantica	tr|A0A504ZB58|A0A504ZB58_FASGI	17	17	66.23	228	26436.2	--	cellular anatomical entity	--	--	--
Malate dehydrogenase OS=Fasciola gigantica OX=46835 GN=FGIG_08365 PE=3 SV=1	F.gigantica	tr|A0A504YCA6|A0A504YCA6_FASGI	13	13	60.98	328	36037.6	metabolic process;biological regulation;cellular process;response to stimulus	cellular anatomical entity	catalytic activity	Energy production and conversion	Carbon metabolism; Metabolic pathways; Pyruvate metabolism; Cysteine and methionine metabolism; Citrate cycle (TCA cycle); Glyoxylate and dicarboxylate metabolism
Phosphoglycerate kinase OS=Fasciola gigantica OX=46835 GN=FGIG_04452 PE=3 SV=1	F.gigantica	tr|A0A504Z124|A0A504Z124_FASGI	14	14	34.22	415	44179.2	response to stimulus;locomotion;reproductive process;cellular process;metabolic process	cellular anatomical entity	catalytic activity;binding	Carbohydrate transport and metabolism	Biosynthesis of amino acids; Carbon metabolism; Metabolic pathways; Glycolysis / Gluconeogenesis
Branched-chain-amino-acid aminotransferase OS=Fasciola gigantica OX=46835 GN=FGIG_02920 PE=3 SV=1	F.gigantica	tr|A0A504Z6I4|A0A504Z6I4_FASGI	15	15	58.66	387	43627	biological regulation;metabolic process;localization;cellular process	cellular anatomical entity	catalytic activity	Amino acid transport and metabolism;Coenzyme transport and metabolism	Cysteine and methionine metabolism; Pantothenate and CoA biosynthesis; 2-Oxocarboxylic acid metabolism; Biosynthesis of cofactors; Metabolic pathways; Valine, leucine and isoleucine biosynthesis; Valine, leucine and isoleucine degradation; Biosynthesis of amino acids
Glutathione transferase OS=Fasciola gigantica OX=46835 GN=FGIG_08719 PE=3 SV=1	F.gigantica	tr|A0A504YW63|A0A504YW63_FASGI	14	13	33.55	313	35968.5	--	--	--	--	Glutathione metabolism; Chemical carcinogenesis - receptor activation; Chemical carcinogenesis - DNA adducts; Pathways in cancer; Metabolic pathways; Drug metabolism - other enzymes; Hepatocellular carcinoma; Chemical carcinogenesis - reactive oxygen species; Metabolism of xenobiotics by cytochrome P450; Fluid shear stress and atherosclerosis; Platinum drug resistance; Drug metabolism - cytochrom…
Peptidase D OS=Fasciola gigantica OX=46835 GN=FGIG_12081 PE=4 SV=1	F.gigantica	tr|A0A504XV93|A0A504XV93_FASGI	13	13	38.77	405	45328.6	cellular process;metabolic process	cellular anatomical entity	catalytic activity;binding	Amino acid transport and metabolism	--
SERPIN domain-containing protein OS=Fasciola gigantica OX=46835 GN=FGIG_04537 PE=3 SV=1	F.gigantica	tr|A0A504Y562|A0A504Y562_FASGI	13	13	38.27	358	39709.2	--	--	--	Posttranslational modification, protein turnover, chaperones	--
Fructose-bisphosphatase (Fragment) OS=Fasciola gigantica OX=46835 GN=FGIG_04759 PE=3 SV=1	F.gigantica	tr|A0A504YWE6|A0A504YWE6_FASGI	14	6	51.08	372	40482.8	cellular process;metabolic process	--	catalytic activity;binding	Carbohydrate transport and metabolism	Carbon metabolism; Metabolic pathways; Glycolysis / Gluconeogenesis; Pentose phosphate pathway; Fructose and mannose metabolism
Spectrin beta chain OS=Fasciola gigantica OX=46835 GN=FGIG_08554 PE=3 SV=1	F.gigantica	tr|A0A504YIN4|A0A504YIN4_FASGI	11	11	6.293	2336	270020	signaling;cellular process;biological regulation	cellular anatomical entity	binding	--	--
Heat shock protein 4L OS=Fasciola gigantica OX=46835 GN=FGIG_10505 PE=3 SV=1	F.gigantica	tr|A0A504YYB0|A0A504YYB0_FASGI	11	10	20.83	624	70221.6	--	cellular anatomical entity	binding	Posttranslational modification, protein turnover, chaperones	Protein processing in endoplasmic reticulum
Phosphoglucomutase (alpha-D-glucose-1,6-bisphosphate-dependent) OS=Fasciola gigantica OX=46835 GN=FGIG_07540 PE=3 SV=1	F.gigantica	tr|A0A504Z4F7|A0A504Z4F7_FASGI	14	14	37.65	579	63666	--	--	--	Carbohydrate transport and metabolism	Glycolysis / Gluconeogenesis; Galactose metabolism; Metabolic pathways; Biosynthesis of nucleotide sugars; Purine metabolism; Starch and sucrose metabolism; Amino sugar and nucleotide sugar metabolism; Pentose phosphate pathway
Retinaldehyde binding protein OS=Fasciola gigantica OX=46835 GN=FGIG_07780 PE=4 SV=1	F.gigantica	tr|A0A504YX94|A0A504YX94_FASGI	10	10	42.03	364	41760.4	--	--	--	--	--
Translation elongation factor 2 OS=Fasciola gigantica OX=46835 GN=FGIG_00796 PE=3 SV=1	F.gigantica	tr|A0A504YZD9|A0A504YZD9_FASGI	11	11	15.06	850	94616.2	--	--	--	Translation, ribosomal structure and biogenesis	--
Methylmalonyl-CoA mutase OS=Fasciola gigantica OX=46835 GN=FGIG_08857 PE=3 SV=1	F.gigantica	tr|A0A504YZU3|A0A504YZU3_FASGI	10	10	18.33	742	81940.9	multicellular organismal process;metabolic process;cellular process	cellular anatomical entity	catalytic activity;binding	--	Valine, leucine and isoleucine degradation; Glyoxylate and dicarboxylate metabolism; Metabolic pathways; Carbon metabolism; Propanoate metabolism
Triosephosphate isomerase OS=Fasciola gigantica OX=46835 GN=FGIG_01767 PE=3 SV=1	F.gigantica	tr|A0A504YTK2|A0A504YTK2_FASGI	10	10	55.34	253	27794.6	cellular process;developmental process;multicellular organismal process;metabolic process	cellular anatomical entity	catalytic activity;binding	Carbohydrate transport and metabolism	Metabolic pathways; Carbon metabolism; Biosynthesis of amino acids; Inositol phosphate metabolism; Glycolysis / Gluconeogenesis; Fructose and mannose metabolism
Kynurenine---oxoglutarate transaminase OS=Fasciola gigantica OX=46835 GN=FGIG_10384 PE=4 SV=1	F.gigantica	tr|A0A504YVF1|A0A504YVF1_FASGI	11	11	37.5	368	40858.9	metabolic process;cellular process	--	catalytic activity;binding	Amino acid transport and metabolism	Cysteine and methionine metabolism; Selenocompound metabolism; Tryptophan metabolism; Metabolic pathways
Ezrin-moesin-radixin OS=Fasciola gigantica OX=46835 GN=FGIG_06080 PE=4 SV=1	F.gigantica	tr|A0A504ZA08|A0A504ZA08_FASGI	10	10	22.94	558	65737.2	developmental process;cellular process;localization;biological regulation;multicellular organismal process;response to stimulus	cellular anatomical entity;protein-containing complex	binding;structural molecule activity	--	--
Clathrin heavy chain OS=Fasciola gigantica OX=46835 GN=FGIG_02390 PE=3 SV=1	F.gigantica	tr|A0A504YEU6|A0A504YEU6_FASGI	11	11	8.111	1726	196045	biological regulation;metabolic process;immune system process;developmental process;cellular process;localization	protein-containing complex;cellular anatomical entity	binding;structural molecule activity	--	Lysosome; Endocytosis
Filamin-A OS=Fasciola gigantica OX=46835 GN=FGIG_10911 PE=3 SV=1	F.gigantica	tr|A0A504YKH3|A0A504YKH3_FASGI	10	10	9.316	1374	150062	biological adhesion;biological regulation;localization;developmental process;cellular process	cellular anatomical entity;protein-containing complex	binding	--	--
Leukotriene A-4 hydrolase OS=Fasciola gigantica OX=46835 GN=FGIG_00782 PE=3 SV=1	F.gigantica	tr|A0A504X7M0|A0A504X7M0_FASGI	11	11	26.91	680	77608.4	response to stimulus;metabolic process;cellular process;developmental process	cellular anatomical entity	catalytic activity;binding	Amino acid transport and metabolism	Arachidonic acid metabolism; Metabolic pathways
Thioredoxin-glutathione reductase 2 OS=Fasciola gigantica OX=46835 PE=2 SV=1; Thioredoxin-glutathione reductase 1 OS=Fasciola gigantica OX=46835 PE=2 SV=1	F.gigantica	tr|A0A0K1NZF7|A0A0K1NZF7_FASGI;tr|A0A0K1NYF8|A0A0K1NYF8_FASGI	11	4	33.96	639	70977.9	response to stimulus;biological regulation;metabolic process;cellular process	cellular anatomical entity	catalytic activity;binding;antioxidant activity	Energy production and conversion	Selenocompound metabolism
Glutamine synthetase OS=Fasciola gigantica OX=46835 GN=FGIG_06082 PE=3 SV=1	F.gigantica	tr|A0A504YZA2|A0A504YZA2_FASGI	10	10	25.31	490	55153.2	metabolic process	--	catalytic activity	Amino acid transport and metabolism	--
Myoferlin OS=Fasciola gigantica OX=46835 GN=FGIG_11155 PE=4 SV=1	F.gigantica	tr|A0A504ZB63|A0A504ZB63_FASGI	10	9	17.03	687	79044.1	--	cellular anatomical entity	--	--	--
Malate dehydrogenase OS=Fasciola gigantica OX=46835 GN=FGIG_05200 PE=3 SV=1	F.gigantica	tr|A0A504Z4D3|A0A504Z4D3_FASGI	12	12	38.57	363	39066.8	--	--	--	Energy production and conversion	Pyruvate metabolism; Glyoxylate and dicarboxylate metabolism; Citrate cycle (TCA cycle); Cysteine and methionine metabolism; Metabolic pathways; Carbon metabolism
Peptidyl-prolyl cis-trans isomerase OS=Fasciola gigantica OX=46835 GN=FGIG_11717 PE=3 SV=1	F.gigantica	tr|A0A504YFI1|A0A504YFI1_FASGI	12	12	76.69	163	17744.2	metabolic process;biological regulation;cellular process;developmental process	cellular anatomical entity	binding;catalytic activity	Posttranslational modification, protein turnover, chaperones	--
Aspartate aminotransferase OS=Fasciola gigantica OX=46835 GN=FGIG_08565 PE=3 SV=1	F.gigantica	tr|A0A504Y7H3|A0A504Y7H3_FASGI	11	11	31.66	398	44493.3	cellular process;localization;metabolic process	cellular anatomical entity	catalytic activity;binding	Amino acid transport and metabolism	Phenylalanine, tyrosine and tryptophan biosynthesis; Tyrosine metabolism; Biosynthesis of amino acids; Carbon metabolism; Arginine and proline metabolism; Alanine, aspartate and glutamate metabolism; Cysteine and methionine metabolism; 2-Oxocarboxylic acid metabolism; Metabolic pathways; Arginine biosynthesis; Phenylalanine metabolism
UTP--glucose-1-phosphate uridylyltransferase OS=Fasciola gigantica OX=46835 GN=FGIG_09880 PE=3 SV=1	F.gigantica	tr|A0A504Z3Q6|A0A504Z3Q6_FASGI	10	10	27.93	358	40338.4	metabolic process;multicellular organismal process;developmental process;cellular process	cellular anatomical entity	catalytic activity;binding	Coenzyme transport and metabolism;Carbohydrate transport and metabolism	Galactose metabolism; Biosynthesis of cofactors; Starch and sucrose metabolism; Metabolic pathways; Pentose and glucuronate interconversions; Amino sugar and nucleotide sugar metabolism; Biosynthesis of nucleotide sugars
Calponin OS=Fasciola gigantica OX=46835 GN=FGIG_01172 PE=3 SV=1	F.gigantica	tr|A0A504YK51|A0A504YK51_FASGI	10	10	31.86	361	39853	--	--	--	--	--
ATP binding cassette subfamily B MDR TAP OS=Fasciola gigantica OX=46835 GN=FGIG_05048 PE=4 SV=1	F.gigantica	tr|A0A504YNZ1|A0A504YNZ1_FASGI	8	8	8.968	1260	139481	reproductive process;regulation of biological process;immune system process;cellular process;response to stimulus;biological regulation;developmental process;localization	cellular anatomical entity	transporter activity;binding;ATP-dependent activity	--	ABC transporters
Tubulin beta chain OS=Fasciola gigantica OX=46835 GN=FGIG_02819 PE=3 SV=1	F.gigantica	tr|A0A504YSW8|A0A504YSW8_FASGI	10	10	28.73	442	49787.9	response to stimulus;biological process involved in interspecies interaction between organisms;cellular process;immune system process	cellular anatomical entity;protein-containing complex	structural molecule activity;binding;catalytic activity	--	Salmonella infection; Phagosome; Gap junction
Tetratricopeptide repeat protein 39B OS=Fasciola gigantica OX=46835 GN=FGIG_08861 PE=4 SV=1	F.gigantica	tr|A0A504Z3T9|A0A504Z3T9_FASGI	8	8	13.59	677	77736	--	--	--	--	--
Nardilysin OS=Fasciola gigantica OX=46835 GN=FGIG_05052 PE=4 SV=1	F.gigantica	tr|A0A504YB95|A0A504YB95_FASGI	10	10	12.58	1033	117177	metabolic process	--	catalytic activity	Posttranslational modification, protein turnover, chaperones	--
Filamin-A OS=Fasciola gigantica OX=46835 GN=FGIG_01162 PE=3 SV=1	F.gigantica	tr|A0A504ZB76|A0A504ZB76_FASGI	10	10	4.297	2490	269334	--	--	--	--	--
Glutathione transferase OS=Fasciola gigantica OX=46835 GN=FGIG_05292 PE=3 SV=1	F.gigantica	tr|A0A504YYF4|A0A504YYF4_FASGI	10	10	32.22	419	47891.8	response to stimulus;biological process involved in interspecies interaction between organisms;metabolic process;cellular process	cellular anatomical entity	translation regulator activity;binding	Posttranslational modification, protein turnover, chaperones	--
Tyrosine 3-monooxygenase/tryptophan 5-monooxygenase activation protein theta polypeptide OS=Fasciola gigantica OX=46835 GN=FGIG_07351 PE=3 SV=1	F.gigantica	tr|A0A504YX93|A0A504YX93_FASGI	17	8	71.03	252	28661.1	response to stimulus;multicellular organismal process;biological regulation;localization;developmental process;behavior;reproductive process;biological adhesion;cellular process	protein-containing complex;cellular anatomical entity	binding	--	Cell cycle; Longevity regulating pathway - worm; Oocyte meiosis
Acetyl-CoA deacylase OS=Fasciola gigantica OX=46835 GN=FGIG_02713 PE=3 SV=1	F.gigantica	tr|A0A504YC54|A0A504YC54_FASGI	8	8	26.57	478	52470.7	cellular process;metabolic process	cellular anatomical entity	catalytic activity	Energy production and conversion	--
Tyrosine 3-monooxygenase/tryptophan 5-monooxygenase activation protein theta polypeptide OS=Fasciola gigantica OX=46835 GN=FGIG_05814 PE=3 SV=1	F.gigantica	tr|A0A504YKJ3|A0A504YKJ3_FASGI	11	9	49.79	243	27494.8	cellular process;biological regulation;metabolic process	--	binding;catalytic activity	--	Hippo signaling pathway - fly
Myoglobin 1 OS=Fasciola gigantica OX=46835 GN=FGIG_04909 PE=3 SV=1	F.gigantica	tr|A0A504YY71|A0A504YY71_FASGI	8	8	66.44	149	16656.1	--	--	binding	--	--
Gill-specific calpain OS=Fasciola gigantica OX=46835 GN=FGIG_01291 PE=3 SV=1	F.gigantica	tr|A0A504YWV2|A0A504YWV2_FASGI	8	8	11.91	722	83500.7	--	--	--	Defense mechanisms	--
Dipeptidyl peptidase OS=Fasciola gigantica OX=46835 GN=FGIG_09152 PE=4 SV=1	F.gigantica	tr|A0A504Y6F5|A0A504Y6F5_FASGI	8	8	22.76	615	69059.9	metabolic process	cellular anatomical entity	catalytic activity;binding	--	--
Ferritin OS=Fasciola gigantica OX=46835 GN=FGIG_03790 PE=3 SV=1	F.gigantica	tr|A0A504YQY7|A0A504YQY7_FASGI	9	9	29.52	210	24370.1	--	--	--	--	--
[truncated: 346 more rows]

## Sheet: A2W14
Names	Species	Acc	#Peptide	#Unique Peptide	Coverage(%)	Length	Mass	GO function(Biological Process)	GO function(Cellular Component)	GO function(Molecular Function)	COG_function	Kegg_function
[truncated: 416 more rows]

[truncated: 4 more sheets: A2W20, A3W7, A3W14, A3W20]
