# Supplementary material for: Proteomic analysis of Fasciola gigantica excretory and secretory products (FgESPs) co-immunoprecipitated using a time course of infected buffalo sera
Source: Front Microbiol. 2022 Dec 23;13:1089394. doi: 10.3389/fmicb.2022.1089394 (PMC9816151; doi:10.3389/fmicb.2022.1089394)
Supplement: Supplementary file 4 [file Table_4.XLSX]

## Sheet: Sheet1
Table S4. The 87 proteins consistently identified in the infection group.
Protein Names	Species	Acc	#Peptide	#Unique Peptide	Coverage(%)	Length	Mass
Glutamate dehydrogenase	F. gigantica	tr|A0A504YK79|A0A504YK79_FASGI	28	28	56.18	534	58745
Phosphoglucomutase	F. gigantica	tr|A0A504Z4F7|A0A504Z4F7_FASGI	12	12	29.36	579	63666
Putative pyridine nucleotide-disulfide oxidoreductase	F. gigantica	tr|A0A504YZM6|A0A504YZM6_FASGI	14	14	40.11	541	60473.2
Multi-domain cystatin	F. gigantica	tr|A0A504ZA07|A0A504ZA07_FASGI	30	30	30.93	1083	124545
GST C-terminal domain-containing protein	F. gigantica	tr|A0A504YWR3|A0A504YWR3_FASGI	8	8	61.59	164	18667.1
Putative Cofilin actophorin	F. gigantica	tr|A0A504Z805|A0A504Z805_FASGI	8	8	74.81	135	15646.9
Ubiquitin activating enzyme	F. gigantica	tr|A0A504Y452|A0A504Y452_FASGI	35	35	45.31	1077	120430
Peptidase D	F. gigantica	tr|A0A504XV93|A0A504XV93_FASGI	15	15	46.91	405	45328.6
Fh51	F. gigantica	tr|A0A504Z0W5|A0A504Z0W5_FASGI	1	1	15.89	107	12544.3
Cardiac muscle alpha actin	F. gigantica	tr|A0A504YYH3|A0A504YYH3_FASGI	15	1	41.07	375	41696.3
Myoglobin	F. gigantica	tr|A0A504YI87|A0A504YI87_FASGI	5	3	48.8	125	14368.6
Rab GDP dissociation inhibitor (Fragment)	F. gigantica	tr|A0A504YC55|A0A504YC55_FASGI	4	2	36.67	180	20115.3
Uncharacterized protein	F. gigantica	tr|A0A504ZB58|A0A504ZB58_FASGI	15	15	71.49	228	26436.2
L-plastin	F. gigantica	tr|A0A504YSL7|A0A504YSL7_FASGI	72	72	70.46	650	73873.6
Kynurenine---oxoglutarate transaminase	F. gigantica	tr|A0A504YVF1|A0A504YVF1_FASGI	16	16	50.82	368	40858.9
Nardilysin	F. gigantica	tr|A0A504YB95|A0A504YB95_FASGI	8	8	9.777	1033	117177
Filamin-A	F. gigantica	tr|A0A504ZB76|A0A504ZB76_FASGI	11	11	4.618	2490	269334
Putative annexin (Fragment)	F. gigantica	tr|A0A504YXG1|A0A504YXG1_FASGI	3	3	10.94	192	22108.6
Malate dehydrogenase	F. gigantica	tr|A0A504Z4Z6|A0A504Z4Z6_FASGI	1	1	10.08	119	13203
Glyceraldehyde-3-phosphate dehydrogenase	F. gigantica	tr|A0A504YCL4|A0A504YCL4_FASGI	19	19	60.53	337	36542.6
Severin	F. gigantica	tr|A0A504Z761|A0A504Z761_FASGI	21	21	60.16	379	43100.3
Peptidyl-prolyl cis-trans isomerase	F. gigantica	tr|A0A504YFI1|A0A504YFI1_FASGI	10	10	82.21	163	17744.2
Translation elongation factor 2	F. gigantica	tr|A0A504YZD9|A0A504YZD9_FASGI	18	18	27.65	850	94616.2
Acid sphingomyelinase phosphodiesterase 3a	F. gigantica	tr|A0A504YQ34|A0A504YQ34_FASGI	5	5	17.95	479	54414.4
Malate dehydrogenase	F. gigantica	tr|A0A504Z4D3|A0A504Z4D3_FASGI	10	10	35.81	363	39066.8
Ferritin	F. gigantica	tr|A0A504YX11|A0A504YX11_FASGI	5	5	32.3	226	26082.8
Alpha-aminoadipic semialdehyde synthase mitochondrial	F. gigantica	tr|A0A504Z3L9|A0A504Z3L9_FASGI	15	15	76.42	246	27863.8
EGF-like domain-containing protein	F. gigantica	tr|A0A504YQK1|A0A504YQK1_FASGI	17	17	12.53	1987	221530
Calpain	F. gigantica	tr|A0A504YK94|A0A504YK94_FASGI	5	5	26.06	165	18525.2
Alanine aminotransferase	F. gigantica	tr|A0A504YJK4|A0A504YJK4_FASGI	19	19	50.4	500	55531.7
Propanoyl-CoA:carbon dioxide ligase subunit alpha	F. gigantica	tr|A0A504YJJ4|A0A504YJJ4_FASGI	25	25	45.47	750	82609
Ezrin-moesin-radixin	F. gigantica	tr|A0A504ZA08|A0A504ZA08_FASGI	16	16	38.35	558	65737.2
Protein disulfide-isomerase	F. gigantica	tr|A0A504YYD5|A0A504YYD5_FASGI	6	6	15.7	484	54811.9
Transaldolase	F. gigantica	tr|A0A504YML1|A0A504YML1_FASGI	6	6	26.69	281	31342.7
Ornithine aminotransferase mitochondrial	F. gigantica	tr|A0A504Z3T4|A0A504Z3T4_FASGI	5	5	20.25	326	37115.2
Alpha-1,4 glucan phosphorylase	F. gigantica	tr|A0A504YK53|A0A504YK53_FASGI	36	36	51.79	840	96630.7
Prostaglandin-H2 D-isomerase	F. gigantica	tr|A0A504Z3A0|A0A504Z3A0_FASGI	14	14	66.82	211	24568.3
Bravo_FIGEY domain-containing protein	F. gigantica	tr|A0A504Y7M0|A0A504Y7M0_FASGI	12	10	19.66	875	96905.4
Heat shock protein 70	F. gigantica	tr|B1NI97|B1NI97_FASGI	27	27	38.91	645	70766.1
Propionyl-CoA carboxylase beta chain	F. gigantica	tr|A0A504YAE5|A0A504YAE5_FASGI	27	27	53.64	535	58544.9
Dynein light chain	F. gigantica	tr|A0A504YNX9|A0A504YNX9_FASGI	7	7	75.28	89	10286.5
Glutathione transferase	F. gigantica	tr|A0A504YW63|A0A504YW63_FASGI	10	10	29.07	313	35968.5
Acetyl-CoA deacylase	F. gigantica	tr|A0A504YC54|A0A504YC54_FASGI	11	11	36.4	478	52470.7
Filamin-A	F. gigantica	tr|A0A504YKH3|A0A504YKH3_FASGI	20	20	19.36	1374	150062
Heat shock protein heat shock protein 90 alpha	F. gigantica	tr|A0A504YG42|A0A504YG42_FASGI	27	25	40.3	722	82427.7
14-3-3 protein zeta/delta	F. gigantica	tr|A0A504YNS3|A0A504YNS3_FASGI	10	9	79.13	115	13194.5
Protein disulfide-isomerase	F. gigantica	tr|A0A504Z0Y0|A0A504Z0Y0_FASGI	18	18	44.38	489	55181.4
Fructose-bisphosphate aldolase	F. gigantica	tr|A0A504Z4Y4|A0A504Z4Y4_FASGI	7	7	49.75	201	21259.3
Thiol-specific antioxidant	F. gigantica	tr|A0A504YJL0|A0A504YJL0_FASGI	30	30	64.61	243	27249.2
Annexin	F. gigantica	tr|A0A504Z5J0|A0A504Z5J0_FASGI	3	3	17.31	208	23517.6
Rab GDP dissociation inhibitor beta	F. gigantica	tr|A0A504YD60|A0A504YD60_FASGI	9	8	40.2	306	35233.5
Triosephosphate isomerase	F. gigantica	tr|A0A504YTK2|A0A504YTK2_FASGI	13	13	63.64	253	27794.6
Actin alpha skeletal muscle protein	F. gigantica	tr|A0A504YPI2|A0A504YPI2_FASGI	10	3	89.25	93	10447.2
Phosphoenolpyruvate carboxykinase (GTP)	F. gigantica	tr|A0A504YUP2|A0A504YUP2_FASGI	36	36	70	550	61415.2
cAMP-dependent protein kinase catalytic subunit alpha	F. gigantica	tr|A0A504YN48|A0A504YN48_FASGI	3	3	14.02	321	37344
Ferritin	F. gigantica	tr|A0A504YTH3|A0A504YTH3_FASGI	5	5	40.37	218	25133.6
Fructose-bisphosphatase (Fragment)	F. gigantica	tr|A0A504YWE6|A0A504YWE6_FASGI	11	7	46.51	372	40482.8
SERPIN domain-containing protein	F. gigantica	tr|A0A504Y562|A0A504Y562_FASGI	15	15	39.39	358	39709.2
CUB domain-containing protein	F. gigantica	tr|A0A504YUL5|A0A504YUL5_FASGI	1	1	5.306	245	26863
Ferritin	F. gigantica	tr|A0A504YQY7|A0A504YQY7_FASGI	5	5	26.67	210	24370.1
Oxoglutarate dehydrogenase (succinyl-transferring)	F. gigantica	tr|A0A504Z421|A0A504Z421_FASGI	24	24	28.65	1054	119538
Actin alpha cardiac muscle 1; Actin alpha cardiac muscle 1	F. gigantica	tr|A0A504YKQ2|A0A504YKQ2_FASGI;tr|A0A504YJ32|A0A504YJ32_FASGI	22	4	66.76	376	41771.4
6-phosphogluconate dehydrogenase, decarboxylating	F. gigantica	tr|A0A504Z133|A0A504Z133_FASGI	23	23	57.58	495	54361.1
Alpha-actinin sarcomeric	F. gigantica	tr|A0A504WV76|A0A504WV76_FASGI	40	38	75.18	423	49371.2
Fructose-bisphosphate aldolase (Fragment)	F. gigantica	tr|A0A504ZAW9|A0A504ZAW9_FASGI	10	10	62.5	128	14183.3
Methylmalonyl-CoA mutase	F. gigantica	tr|A0A504YZU3|A0A504YZU3_FASGI	19	19	36.52	742	81940.9
Myoferlin	F. gigantica	tr|A0A504ZB63|A0A504ZB63_FASGI	11	11	19.21	687	79044.1
Malic enzyme	F. gigantica	tr|A0A504YH77|A0A504YH77_FASGI	28	28	59.59	584	63743.6
Alpha-actinin isoform B (Fragment)	F. gigantica	tr|A0A504Y787|A0A504Y787_FASGI	27	27	62.28	342	39289.7
Glutamine synthetase	F. gigantica	tr|A0A504YZA2|A0A504YZA2_FASGI	12	12	34.49	490	55153.2
SERPIN domain-containing protein	F. gigantica	tr|A0A504X338|A0A504X338_FASGI	8	8	29.79	235	26024.8
Malate dehydrogenase	F. gigantica	tr|A0A504YCA6|A0A504YCA6_FASGI	14	14	52.44	328	36037.6
Tyrosine 3-monooxygenase/tryptophan 5-monooxygenase activation protein theta polypeptide	F. gigantica	tr|A0A504YX93|A0A504YX93_FASGI	15	13	66.27	252	28661.1
Sarcoplasmic calcium-binding protein	F. gigantica	tr|A0A504YGP8|A0A504YGP8_FASGI	25	25	73.18	384	44814.8
Branched-chain-amino-acid aminotransferase	F. gigantica	tr|A0A504Z6I4|A0A504Z6I4_FASGI	16	16	52.2	387	43627.1
Calponin	F. gigantica	tr|A0A504YK51|A0A504YK51_FASGI	6	6	24.65	361	39853
Leucine aminopeptidase	F. gigantica	tr|A0A504YQV7|A0A504YQV7_FASGI	26	25	65.42	428	46368.1
Dysferlin (Fragment)	F. gigantica	tr|A0A504Z0Y5|A0A504Z0Y5_FASGI	8	8	15.73	655	72987.9
Severin	F. gigantica	tr|A0A504YFI9|A0A504YFI9_FASGI	26	26	59.95	407	47394.3
Retinaldehyde binding protein	F. gigantica	tr|A0A504YX94|A0A504YX94_FASGI	10	10	38.46	364	41760.4
Putative vacuolar protein sorting 26 vps26	F. gigantica	tr|A0A504YQE4|A0A504YQE4_FASGI	8	8	19.24	551	60734
Leukotriene A-4 hydrolase	F. gigantica	tr|A0A504X7M0|A0A504X7M0_FASGI	13	13	31.32	680	77608.4
UTP--glucose-1-phosphate uridylyltransferase	F. gigantica	tr|A0A504Z3Q6|A0A504Z3Q6_FASGI	8	8	28.21	358	40338.4
CUB domain-containing protein	F. gigantica	tr|A0A504Z0I2|A0A504Z0I2_FASGI	2	2	6.431	311	34475.9
Annexin	F. gigantica	tr|A0A504Y587|A0A504Y587_FASGI	8	8	38.78	263	29408.4
Aspartate aminotransferase	F. gigantica	tr|A0A504Y7H3|A0A504Y7H3_FASGI	16	16	53.77	398	44493.3
Paramyosin	F. gigantica	tr|A0A504Z290|A0A504Z290_FASGI	9	9	11.45	865	99483.4
