# Supplementary material for: Proteomic analysis of Fasciola gigantica excretory and secretory products (FgESPs) co-immunoprecipitated using a time course of infected buffalo sera
Source: Front Microbiol. 2022 Dec 23;13:1089394. doi: 10.3389/fmicb.2022.1089394 (PMC9816151; doi:10.3389/fmicb.2022.1089394)
Supplement: Supplementary file 6 [file Table_6.xlsx]

## Sheet: Sheet1
Table S6. Specific proteins identified at a specific wpi in the infection group.
Preiod (wpi)	Protein Names	Species	Acc	#Peptide	#Unique Peptide	Coverage(%)	Length	Mass	GO function(Biological Process)	GO function(Cellular Component)	GO function(Molecular Function)	Subcelular locate	KEEG Pathway ID	KEEG Pathway Name	KEEG Category	KEEG Class	KEEG Hyperlink
1	Polyubiquitin	F. gigantica	tr|A0A504YHV3|A0A504YHV3_FASGI	2	2	22.92	192	21751.8	metabolic process;localization;multi-organism process;developmental process;viral process;cellular process;biological regulation;response to stimulus;immune system process	cellular anatomical entity		cyto_nucl; cyto; cyto_plas; nucl	--	--	--	--	--
1	Uncharacterized protein	F. gigantica	tr|A0A504YZ24|A0A504YZ24_FASGI	2	2	1.745	974	104192	--	--	--	nucl(10)	--	--	--	--	--
1	Programmed cell death 6-interacting protein	F. gigantica	tr|A0A504YYX2|A0A504YYX2_FASGI	1	1	12.42	153	17779.8	--	--	--	cyto(10.5)	--	--	--	--	--
1	Patatin phospholipase domain-containing protein 7	F. gigantica	tr|A0A504YDK2|A0A504YDK2_FASGI	1	1	0.425	1647	183648	metabolic process;cellular process;developmental process	cellular anatomical entity	catalytic activity	E.R.(8)	--	--	--	--	--
1	Histone H2B	F. gigantica	tr|A0A504Z6J7|A0A504Z6J7_FASGI	2	2	16.39	122	13676.9	cellular process	protein-containing complex;cellular anatomical entity	binding	nucl(32)	--	--	--	--	--
1	Histone H3	F. gigantica	tr|A0A504YJX2|A0A504YJX2_FASGI	1	1	4.186	215	24017.2	metabolic process;multicellular organismal process;biological regulation;cellular process	cellular anatomical entity;protein-containing complex	binding	nucl(32)	--	--	--	--	--
1	Rab protein 8	F. gigantica	tr|A0A504YTT9|A0A504YTT9_FASGI	1	1	5.366	205	23447.8	developmental process;response to stimulus;cellular process;immune system process;multicellular organismal process;biological regulation;localization	cellular anatomical entity	catalytic activity;binding	cyto(24)	--	--	--	--	--
1	Histone H2A	F. gigantica	tr|A0A504YHG3|A0A504YHG3_FASGI	2	2	22.4	125	13474.7	immune system process;response to stimulus;cellular process;biological process involved in interspecies interaction between organisms;biological regulation	cellular anatomical entity;protein-containing complex	binding	nucl(32)	--	--	--	--	--
1	Uncharacterized protein	F. gigantica	tr|A0A504YV82|A0A504YV82_FASGI	1	1	2.105	285	32801.4	--	--	--	nucl(16); cyto_nucl(14); cyto(10)	--	--	--	--	--
1	DEAH (Asp-Glu-Ala-His) box polypeptide 16	F. gigantica	tr|A0A504YS75|A0A504YS75_FASGI	1	1	1.218	739	83904.4	cellular process;response to stimulus;metabolic process;developmental process	protein-containing complex;cellular anatomical entity	catalytic activity;ATP-dependent activity;molecular transducer activity;binding	nucl(30)	--	--	--	--	--
1	Uncharacterized protein	F. gigantica	tr|A0A504Z2Y6|A0A504Z2Y6_FASGI	1	1	5.755	139	15069.8	--	--	--	mito(21.5); mito_pero(13)	--	--	--	--	--
1	Uncharacterized protein	F. gigantica	tr|A0A504Z2Y6|A0A504Z2Y6_FASGI	1	1	5.755	139	15069.8	--	--	--	mito(21.5); mito_pero(13)	--	--	--	--	--
1	CCT-alpha	F. gigantica	tr|A0A504YGF9|A0A504YGF9_FASGI	1	1	1.808	553	60294.1	cellular process;localization;multicellular organismal process;biological process involved in interspecies interaction between organisms;metabolic process;reproductive process;developmental process;biological regulation	protein-containing complex;cellular anatomical entity	catalytic activity;binding	cyto(26); cyto_nucl(15)	--	--	--	--	--
3	Uncharacterized protein	F. gigantica	tr|A0A504YZ86|A0A504YZ86_FASGI	1	1	1.724	406	46413.7	--	--	--	E.R._mito(11.5)	--	--	--	--	--
3	Histone-lysine N-methyltransferase	F. gigantica	tr|A0A504Z2V2|A0A504Z2V2_FASGI	1	1	0.7481	1604	178626	cellular process;metabolic process;biological regulation	cellular anatomical entity	catalytic activity;binding	nucl(20.5); cyto_nucl(16)	ko01100;ko00310	Metabolic pathways; Lysine degradation	Metabolism;Metabolism	Global and overview maps;Amino acid metabolism	https://www.kegg.jp/kegg-bin/show_pathway?map01100;https://www.kegg.jp/kegg-bin/show_pathway?map00310
3	Protein dopey-2	F. gigantica	tr|A0A504YQE1|A0A504YQE1_FASGI	1	1	0.446	2018	222306	--	--	--	plas(29)	--	--	--	--	--
3	Uncharacterized protein	F. gigantica	tr|A0A504YGV1|A0A504YGV1_FASGI	1	1	2.02	396	44984.1	--	--	--	cyto(8.5)	--	--	--	--	--
3	Neurobeachin (Fragment)	F. gigantica	tr|A0A504YWJ7|A0A504YWJ7_FASGI	1	1	0.5921	1520	169662	--	cellular anatomical entity	--	extr(11)	--	--	--	--	--
6	WD and tetratricopeptide repeats protein 1 (Fragment)	F. gigantica	tr|A0A504Y6R0|A0A504Y6R0_FASGI	1	1	0.9864	811	88494.7	developmental process;cellular process;response to stimulus;biological regulation;growth;metabolic process;multicellular organismal process	cellular anatomical entity	molecular function regulator;binding	nucl(22)	--	--	--	--	--
6	T-complex protein 1 subunit gamma	F. gigantica	tr|A0A504YS00|A0A504YS00_FASGI	1	1	2.015	546	59636.7	developmental process;reproductive process;cellular process;biological regulation;localization	protein-containing complex;cellular anatomical entity	binding	cyto(23)	--	--	--	--	--
6	Annexin	F. gigantica	tr|A0A504YP52|A0A504YP52_FASGI	1	1	1.754	912	101352	localization;response to stimulus;cellular process	cellular anatomical entity	binding	nucl(19.5); cyto_nucl(16)	--	--	--	--	--
6	Dynein beta chain ciliary	F. gigantica	tr|A0A504YLU8|A0A504YLU8_FASGI	1	1	0.1996	4008	457380	locomotion;cellular process	protein-containing complex	cytoskeletal motor activity;binding;ATP-dependent activity	mito(14)	--	--	--	--	--
6	Peptidase_M16 domain-containing protein	F. gigantica	tr|A0A504X947|A0A504X947_FASGI	1	1	3.607	305	34642.9	--	--	--	cyto(22); cyto_nucl(16.5)	--	--	--	--	--
6	Rho GTPase-activating protein 26	F. gigantica	tr|A0A504Z644|A0A504Z644_FASGI	1	1	1.436	557	61818	biological regulation	--	--	nucl(25.5); cyto_nucl(16)	--	--	--	--	--
6	Uncharacterized protein	F. gigantica	tr|A0A504YCU6|A0A504YCU6_FASGI	1	1	8.029	137	15300.4	--	--	--	nucl(14.5); cyto_nucl(13); cyto(10.5)	--	--	--	--	--
6	Arginine:serine rich splicing factor	F. gigantica	tr|A0A504Z8M6|A0A504Z8M6_FASGI	1	1	3.3	303	34917.1	metabolic process;biological regulation;cellular process;localization	cellular anatomical entity	binding	nucl(26.5); cyto_nucl(14.5)	--	--	--	--	--
8	Otoferlin	F. gigantica	tr|A0A504YPE7|A0A504YPE7_FASGI	2	2	3.276	641	74594.4	--	--	--	cyto;nucl;cyto_nucl
8	Hsp90 chaperone protein kinase-targeting subunit	F. gigantica	tr|A0A504Z2F6|A0A504Z2F6_FASGI	2	2	4.489	401	46666.5	localization;biological regulation;cellular process;response to stimulus	protein-containing complex;cellular anatomical entity	binding;catalytic activity;molecular function regulator	cyto;cyto_nucl;cyto;cyto_nucl
8	Putative Phosphatidylcholine transfer protein	F. gigantica	tr|A0A504YIN5|A0A504YIN5_FASGI	1	1	8.394	274	31652.6	--	--	--	cyto;cyto_nucl
8	Uncharacterized protein	F. gigantica	tr|A0A504YIQ1|A0A504YIQ1_FASGI	1	1	7.299	137	15809.4	--	--	--	cyto;nucl;cyto_nucl	ko04144	Endocytosis	Cellular Processes	Transport and catabolism	https://www.kegg.jp/kegg-bin/show_pathway?map04144
8	Glycerol-3-phosphate dehydrogenase [NAD(+)]	F. gigantica	tr|A0A504YLE5|A0A504YLE5_FASGI	1	1	5.698	351	38696.5	response to stimulus;cellular process;metabolic process;biological regulation	protein-containing complex;cellular anatomical entity	catalytic activity;binding	mito
8	Uncharacterized protein	F. gigantica	tr|A0A504YEJ6|A0A504YEJ6_FASGI	1	1	9.677	124	13905.8	cellular process;metabolic process;biological regulation	cellular anatomical entity	binding;catalytic activity	mito
8	F-actin-capping protein subunit beta	F. gigantica	tr|A0A504Z3F4|A0A504Z3F4_FASGI	1	1	5.091	275	31098.9	biological adhesion;cellular process;developmental process;biological regulation;multicellular organismal process	protein-containing complex;cellular anatomical entity	binding	cyto;cyto_nucl	ko04144;ko01100;ko04145;ko04142;ko00190;ko04150	Endocytosis; Metabolic pathways; Phagosome; Lysosome; Oxidative phosphorylation; mTOR signaling pathway	Cellular Processes;Metabolism;Cellular Processes;Cellular Processes;Metabolism;Environmental Information Processing	Transport and catabolism;Global and overview maps;Transport and catabolism;Transport and catabolism;Energy metabolism;Signal transduction	https://www.kegg.jp/kegg-bin/show_pathway?map04144;https://www.kegg.jp/kegg-bin/show_pathway?map01100;https://www.kegg.jp/kegg-bin/show_pathway?map04145;https://www.kegg.jp/kegg-bin/show_pathway?map04142;https://www.kegg.jp/kegg-bin/show_pathway?map00190;https://www.kegg.jp/kegg-bin/show_pathway?map04150
8	V-type proton ATPase subunit H	F. gigantica	tr|A0A504YTB2|A0A504YTB2_FASGI	1	1	2.347	426	49639.5	pigmentation;viral process;cellular process;localization;biological regulation	cellular anatomical entity;protein-containing complex	transporter activity;binding;ATP-dependent activity	cysk	ko01100;ko04145;ko04142;ko00190;ko04150	Metabolic pathways; Phagosome; Lysosome; Oxidative phosphorylation; mTOR signaling pathway	Metabolism;Cellular Processes;Cellular Processes;Metabolism;Environmental Information Processing	Global and overview maps;Transport and catabolism;Transport and catabolism;Energy metabolism;Signal transduction	https://www.kegg.jp/kegg-bin/show_pathway?map01100;https://www.kegg.jp/kegg-bin/show_pathway?map04145;https://www.kegg.jp/kegg-bin/show_pathway?map04142;https://www.kegg.jp/kegg-bin/show_pathway?map00190;https://www.kegg.jp/kegg-bin/show_pathway?map04150
8	Farnesyl-pyrophosphate synthetase	F. gigantica	tr|A0A504Z1M2|A0A504Z1M2_FASGI	1	1	4.967	302	34353.9	metabolic process;biological regulation;developmental process;reproductive process;response to stimulus;cellular process	cellular anatomical entity	catalytic activity	cyto;cyto_nucl	ko01100;ko00900;ko05164;ko05166	Metabolic pathways; Terpenoid backbone biosynthesis; Influenza A; Human T-cell leukemia virus 1 infection	Metabolism;Metabolism;Human Diseases;Human Diseases	Global and overview maps;Metabolism of terpenoids and polyketides;Infectious disease: viral;Infectious disease: viral	https://www.kegg.jp/kegg-bin/show_pathway?map01100;https://www.kegg.jp/kegg-bin/show_pathway?map00900;https://www.kegg.jp/kegg-bin/show_pathway?map05164;https://www.kegg.jp/kegg-bin/show_pathway?map05166
8	Succinate dehydrogenase [ubiquinone] iron-sulfur subunit, mitochondrial (Fragment)	F. gigantica	tr|A0A504YRX6|A0A504YRX6_FASGI	2	2	9.167	240	27838.2	localization;metabolic process;cellular process	cellular anatomical entity;protein-containing complex	catalytic activity;binding	cyto_mito;mito;extr	ko01100;ko01200;ko00020;ko00190	Metabolic pathways; Carbon metabolism; Citrate cycle (TCA cycle); Oxidative phosphorylation	Metabolism;Metabolism;Metabolism;Metabolism	Global and overview maps;Global and overview maps;Carbohydrate metabolism;Energy metabolism	https://www.kegg.jp/kegg-bin/show_pathway?map01100;https://www.kegg.jp/kegg-bin/show_pathway?map01200;https://www.kegg.jp/kegg-bin/show_pathway?map00020;https://www.kegg.jp/kegg-bin/show_pathway?map00190
8	Constitutive heat shock protein 70	F. gigantica	tr|A0A504Z3X5|A0A504Z3X5_FASGI	8	1	11.37	651	71132.7	biological process involved in interspecies interaction between organisms;multicellular organismal process;rhythmic process;localization;cellular process;biological regulation;growth;developmental process;reproductive process;response to stimulus;metabolic process	cellular anatomical entity;protein-containing complex	binding;ATP-dependent activity	cyto_nucl;cyto	ko04141;ko04144;ko03040;ko04010	Protein processing in endoplasmic reticulum; Endocytosis; Spliceosome; MAPK signaling pathway	Genetic Information Processing;Cellular Processes;Genetic Information Processing;Environmental Information Processing	Folding, sorting and degradation;Transport and catabolism;Transcription;Signal transduction	https://www.kegg.jp/kegg-bin/show_pathway?map04141;https://www.kegg.jp/kegg-bin/show_pathway?map04144;https://www.kegg.jp/kegg-bin/show_pathway?map03040;https://www.kegg.jp/kegg-bin/show_pathway?map04010
8	Defective in cullin neddylation protein	F. gigantica	tr|A0A504YRA2|A0A504YRA2_FASGI	1	1	5.469	256	30409.5	metabolic process;cellular process	protein-containing complex	binding	cyto_nucl;cyto
8	Puromycin-sensitive aminopeptidase	F. gigantica	tr|A0A504Y7V0|A0A504Y7V0_FASGI	1	1	3.571	252	28395.8	response to stimulus;metabolic process;cellular process;biological regulation	cellular anatomical entity	catalytic activity;binding	cyto
8	Purine nucleoside phosphorylase	F. gigantica	tr|A0A504YB65|A0A504YB65_FASGI	3	3	12.24	286	31047.2	biological regulation;metabolic process;multicellular organismal process;immune system process;response to stimulus;cellular process	cellular anatomical entity	binding;catalytic activity	mito;E.R._mito;cyto	ko01100;ko00230;ko00240;ko00760	Metabolic pathways; Purine metabolism; Pyrimidine metabolism; Nicotinate and nicotinamide metabolism	Metabolism;Metabolism;Metabolism;Metabolism	Global and overview maps;Nucleotide metabolism;Nucleotide metabolism;Metabolism of cofactors and vitamins	https://www.kegg.jp/kegg-bin/show_pathway?map01100;https://www.kegg.jp/kegg-bin/show_pathway?map00230;https://www.kegg.jp/kegg-bin/show_pathway?map00240;https://www.kegg.jp/kegg-bin/show_pathway?map00760
8	Bis(5'-adenosyl)-triphosphatase enpp4	F. gigantica	tr|A0A504Z581|A0A504Z581_FASGI	1	1	4.011	374	42827.7	metabolic process	cellular anatomical entity	catalytic activity	cyto	ko01100;ko00500;ko00230;ko00770;ko00240;ko00760;ko00740	Metabolic pathways; Starch and sucrose metabolism; Purine metabolism; Pantothenate and CoA biosynthesis; Pyrimidine metabolism; Nicotinate and nicotinamide metabolism; Riboflavin metabolism	Metabolism;Metabolism;Metabolism;Metabolism;Metabolism;Metabolism;Metabolism	Global and overview maps;Carbohydrate metabolism;Nucleotide metabolism;Metabolism of cofactors and vitamins;Nucleotide metabolism;Metabolism of cofactors and vitamins;Metabolism of cofactors and vitamins	https://www.kegg.jp/kegg-bin/show_pathway?map01100;https://www.kegg.jp/kegg-bin/show_pathway?map00500;https://www.kegg.jp/kegg-bin/show_pathway?map00230;https://www.kegg.jp/kegg-bin/show_pathway?map00770;https://www.kegg.jp/kegg-bin/show_pathway?map00240;https://www.kegg.jp/kegg-bin/show_pathway?map00760;https://www.kegg.jp/kegg-bin/show_pathway?map00740
10	Dynein light chain	F. gigantica	tr|A0A504YTL8|A0A504YTL8_FASGI	1	1	13.48	89	10340.8	--	--	--	cyto(23)	ko05132	Salmonella infection	Human Diseases	Infectious disease: bacterial	https://www.kegg.jp/kegg-bin/show_pathway?map05132
10	Ras domain containing protein	F. gigantica	tr|A0A504YSC3|A0A504YSC3_FASGI	2	2	11.71	205	22373.2	biological regulation;response to stimulus;biological process involved in interspecies interaction between organisms;immune system process;multicellular organismal process;localization;cellular process;developmental process	cellular anatomical entity	binding;catalytic activity	cyto(20); cyto_nucl(12.5)
10	CD59 protein	F. gigantica	tr|A0A504Z108|A0A504Z108_FASGI	3	3	21.31	122	13523.5	--	--	--	extr(32)
10	Vesicle-fusing ATPase	F. gigantica	tr|A0A504Z0R7|A0A504Z0R7_FASGI	1	1	2.691	446	49001.3	localization;response to stimulus;viral process;metabolic process;multicellular organismal process;biological regulation;cellular process;developmental process	protein-containing complex;cellular anatomical entity	catalytic activity;ATP-dependent activity;binding	nucl(15.5); cyto_nucl(14); cyto(11.5)	ko04217;ko04144	Necroptosis; Endocytosis	Cellular Processes;Cellular Processes	Cell growth and death;Transport and catabolism	https://www.kegg.jp/kegg-bin/show_pathway?map04217;https://www.kegg.jp/kegg-bin/show_pathway?map04144
10	Peroxiredoxin Prx4	F. gigantica	tr|A0A504Z7M7|A0A504Z7M7_FASGI	1	1	5.303	132	15110.2	--	--	--	cyto(22); cyto_nucl(15.5); cyto_plas(13.6667)	ko04146;ko05146	Peroxisome; Amoebiasis	Cellular Processes;Human Diseases	Transport and catabolism;Infectious disease: parasitic	https://www.kegg.jp/kegg-bin/show_pathway?map04146;https://www.kegg.jp/kegg-bin/show_pathway?map05146
10	Lysine-specific demethylase PHF2	F. gigantica	tr|A0A504YUZ2|A0A504YUZ2_FASGI	1	1	5.43	221	24399.5	--	--	--	nucl(27.5); cyto_nucl(15)
10	Putative mediator of cell motility 1	F. gigantica	tr|A0A504YHB5|A0A504YHB5_FASGI	1	1	5.346	318	36463.1	biological regulation	cellular anatomical entity	binding	cyto_nucl(11); nucl(10); cyto(10)
10	Uncharacterized protein	F. gigantica	tr|A0A504YIR4|A0A504YIR4_FASGI	1	1	0.3502	2570	283907	multi-organism process;developmental process;cellular process;signaling;behavior;localization;response to stimulus;metabolic process;biological regulation;multicellular organismal process	protein-containing complex;cellular anatomical entity	binding;transporter activity	cyto_nucl(11); nucl(10.5); cyto(10.5)
10	Uncharacterized protein	F. gigantica	tr|A0A504Z668|A0A504Z668_FASGI	1	1	4.435	248	26394.7	--	--	--	extr(16)
10	Uncharacterized protein	F. gigantica	tr|A0A504Z329|A0A504Z329_FASGI	1	1	0.9868	912	100633	--	--	--	cyto(12)
10	Fasciclin-1	F. gigantica	tr|A0A504YZR7|A0A504YZR7_FASGI	1	1	1.695	649	72637.3	--	--	--	extr(12)
10	Pre-mRNA-processing factor 19	F. gigantica	tr|A0A504Z8V4|A0A504Z8V4_FASGI	1	1	1.311	534	57754.5	metabolic process;biological regulation;localization;response to stimulus;cellular process	protein-containing complex;cellular anatomical entity	binding;catalytic activity	nucl(20); cyto_nucl(15.5)	ko04120;ko03040	Ubiquitin mediated proteolysis; Spliceosome	Genetic Information Processing;Genetic Information Processing	Folding, sorting and degradation;Transcription	https://www.kegg.jp/kegg-bin/show_pathway?map04120;https://www.kegg.jp/kegg-bin/show_pathway?map03040
10	Putative NADH-ubiquinone oxidoreductase fe-s protein 2 (Ndufs2)	F. gigantica	tr|A0A504YLQ9|A0A504YLQ9_FASGI	1	1	7.071	99	11133.4	--	cellular anatomical entity	--	extr(12); nucl(11)	ko01100;ko04130;ko00190	Metabolic pathways; SNARE interactions in vesicular transport; Oxidative phosphorylation	Metabolism;Genetic Information Processing;Metabolism	Global and overview maps;Folding, sorting and degradation;Energy metabolism	https://www.kegg.jp/kegg-bin/show_pathway?map01100;https://www.kegg.jp/kegg-bin/show_pathway?map04130;https://www.kegg.jp/kegg-bin/show_pathway?map00190
10	Uncharacterized protein	F. gigantica	tr|A0A504YWY5|A0A504YWY5_FASGI	1	1	0.3827	2352	250943	--	--	--	cyto
10	SBF2 domain-containing protein	F. gigantica	tr|A0A504YX16|A0A504YX16_FASGI	1	1	2.116	378	42595.9	--	--	--	cyto(14)
10	Tegumental calcium-binding EF-hand protein 4	F. gigantica	tr|A0A504Y5U7|A0A504Y5U7_FASGI	1	1	4.717	212	24779.2	--	--	--	cyto(24.5); cyto_nucl(15)
10	GTP-binding nuclear protein	F. gigantica	tr|A0A504YQR1|A0A504YQR1_FASGI	2	2	11.11	216	24717.2	localization;cellular process;biological regulation;developmental process	protein-containing complex;cellular anatomical entity	binding;catalytic activity	cyto(23); cyto_nucl(14)	ko03008;ko03013	Ribosome biogenesis in eukaryotes; Nucleocytoplasmic transport	Genetic Information Processing;Genetic Information Processing	Translation;Translation	https://www.kegg.jp/kegg-bin/show_pathway?map03008;https://www.kegg.jp/kegg-bin/show_pathway?map03013
10	Uncharacterized protein	F. gigantica	tr|A0A504YVP1|A0A504YVP1_FASGI	1	1	3.788	264	29526.6	--	--	--	cyto(8.5)
10	Retinol dehydrogenase 12 (Fragment)	F. gigantica	tr|A0A504YBL8|A0A504YBL8_FASGI	1	1	4.58	393	43742.1	--	--	--	cyto(17.5); cyto_nucl(12)	ko01100;ko01240;ko00830	Metabolic pathways; Biosynthesis of cofactors; Retinol metabolism	Metabolism;Metabolism;Metabolism	Global and overview maps;Global and overview maps;Metabolism of cofactors and vitamins	https://www.kegg.jp/kegg-bin/show_pathway?map01100;https://www.kegg.jp/kegg-bin/show_pathway?map01240;https://www.kegg.jp/kegg-bin/show_pathway?map00830
10	Prostaglandin e synthase	F. gigantica	tr|A0A504YPM3|A0A504YPM3_FASGI	2	2	15.66	198	22270.3	--	--	--	cyto(16.5); cyto_nucl(13)	ko01100;ko00590	Metabolic pathways; Arachidonic acid metabolism	Metabolism;Metabolism	Global and overview maps;Lipid metabolism	https://www.kegg.jp/kegg-bin/show_pathway?map01100;https://www.kegg.jp/kegg-bin/show_pathway?map00590
10	Programmed cell death protein 6 程序性细胞死亡蛋白6	F. gigantica	tr|A0A504Y6I5|A0A504Y6I5_FASGI	1	1	8.148	135	15704.9	biological regulation;cellular process;response to stimulus;localization	cellular anatomical entity	binding;molecular adaptor activity	extr(12)
10	Uncharacterized protein	F. gigantica	tr|A0A504YEP0|A0A504YEP0_FASGI	1	1	4.861	432	47253.2	--	--	--	extr(18.5); extr_plas(12)
10	Glycine cleavage system P protein	F. gigantica	tr|A0A504YUZ3|A0A504YUZ3_FASGI	1	1	1.969	914	101088	cellular process;metabolic process	cellular anatomical entity;protein-containing complex	catalytic activity;binding	mito(27.5); cyto_mito(16.3333)	ko01100;ko01200;ko00630;ko00260	Metabolic pathways; Carbon metabolism; Glyoxylate and dicarboxylate metabolism; Glycine, serine and threonine metabolism	Metabolism;Metabolism;Metabolism;Metabolism	Global and overview maps;Global and overview maps;Carbohydrate metabolism;Amino acid metabolism	https://www.kegg.jp/kegg-bin/show_pathway?map01100;https://www.kegg.jp/kegg-bin/show_pathway?map01200;https://www.kegg.jp/kegg-bin/show_pathway?map00630;https://www.kegg.jp/kegg-bin/show_pathway?map00260
13	Leucine-rich repeat-containing protein 23	F. gigantica	tr|A0A504YJ46|A0A504YJ46_FASGI	1	1	3.243	370	41718.2	--	--	--	cyto(17.5); cyto_nucl(15); nucl(11.5)
13	Putative Ras-related protein Rab-10	F. gigantica	tr|A0A3G4YQA0|A0A3G4YQA0_FASGI	2	2	10.73	205	23090.3	biological regulation;localization;response to stimulus;cellular process;immune system process	cellular anatomical entity	binding;catalytic activity	cyto(11)	ko04144	Endocytosis	Cellular Processes	Transport and catabolism	https://www.kegg.jp/kegg-bin/show_pathway?map04144
13	Basement membrane-specific heparan sulfate proteoglycan core protein	F. gigantica	tr|A0A504YZ37|A0A504YZ37_FASGI	1	1	4.032	248	28340				cyto_nucl(16); nucl(15.5); cyto(11.5)
13	Uncharacterized protein (Fragment)	F. gigantica	tr|A0A504Y8Q2|A0A504Y8Q2_FASGI	1	1	2.206	408	46054				mito(16); cyto(10.5)
13	RAB18 member Ras oncogene family	F. gigantica	tr|A0A504YMP3|A0A504YMP3_FASGI	1	1	5.473	201	22748.5	cellular process;developmental process;reproductive process;biological regulation;multicellular organismal process	cellular anatomical entity	binding	cyto(16)
13	V-type proton ATPase subunit a	F. gigantica	tr|A0A504YEN2|A0A504YEN2_FASGI	1	1	1.816	881	99401.2	cellular process;metabolic process;localization;biological regulation	protein-containing complex;cellular anatomical entity	binding;transporter activity;ATP-dependent activity	plas(31)	ko01100;ko04142;ko04145;ko00190	Metabolic pathways; Lysosome; Phagosome; Oxidative phosphorylation	Metabolism;Cellular Processes;Cellular Processes;Metabolism	Global and overview maps;Transport and catabolism;Transport and catabolism;Energy metabolism	https://www.kegg.jp/kegg-bin/show_pathway?map01100;https://www.kegg.jp/kegg-bin/show_pathway?map04142;https://www.kegg.jp/kegg-bin/show_pathway?map04145;https://www.kegg.jp/kegg-bin/show_pathway?map00190
13	Trimethylguanosine synthase	F. gigantica	tr|A0A504YMZ2|A0A504YMZ2_FASGI	1	1	3.235	340	37810.7	metabolic process;cellular process	cellular anatomical entity	catalytic activity;binding	extr(20)
13	Tegumental calcium-binding EF-hand protein 4	F. gigantica	tr|A0A504YZT4|A0A504YZT4_FASGI	1	1	10.05	189	22284.4	biological regulation;cellular process	protein-containing complex;cellular anatomical entity	binding	cyto(25)
13	DnaJ like protein subfamily A member 1	F. gigantica	tr|A0A504Z4Z3|A0A504Z4Z3_FASGI	1	1	4.975	402	44794.4	localization;cellular process;biological regulation;developmental process;reproductive process;locomotion	cellular anatomical entity	binding	cyto(23); cyto_nucl(15.5)	ko04141	Protein processing in endoplasmic reticulum	Genetic Information Processing	Folding, sorting and degradation	https://www.kegg.jp/kegg-bin/show_pathway?map04141
13	DnaJ like protein subfamily A member 2	F. gigantica	tr|A0A504Z4Z3|A0A504Z4Z3_FASGI	1	1	4.975	402	44794.4	localization;cellular process;biological regulation;developmental process;reproductive process;locomotion	cellular anatomical entity	binding	cyto(23); cyto_nucl(15.5)	ko04141	Protein processing in endoplasmic reticulum	Genetic Information Processing	Folding, sorting and degradation	https://www.kegg.jp/kegg-bin/show_pathway?map04141
13	YTH domain-containing protein	F. gigantica	tr|A0A504YSW6|A0A504YSW6_FASGI	1	1	1.589	818	86944.4	--	--	binding	nucl(18)
13	Translation elongation factor 1-alpha	F. gigantica	tr|A0A504XH41|A0A504XH41_FASGI	1	1	4.472	246	27649.7	cellular process;metabolic process	cellular anatomical entity	binding;translation regulator activity;catalytic activity	mito(17)	ko03013	Nucleocytoplasmic transport	Genetic Information Processing	Translation	https://www.kegg.jp/kegg-bin/show_pathway?map03013
13	Ubiquitin carboxyl-terminal hydrolase	F. gigantica	tr|A0A504YC83|A0A504YC83_FASGI	1	1	1.081	925	102737	cellular process;metabolic process;biological regulation	--	binding;catalytic activity	cyto(14.5); cyto_nucl(14.5); nucl(11.5)
13	NAD(+) kinase	F. gigantica	tr|A0A504YEN6|A0A504YEN6_FASGI	1	1	6.047	215	24246.8	metabolic process;cellular process	cellular anatomical entity	catalytic activity;binding	cyto(13); cyto_nucl(13); cyto_pero(10.1667)	ko01100;ko01240;ko00760;ko04144	Metabolic pathways; Biosynthesis of cofactors; Nicotinate and nicotinamide metabolism; Endocytosis	Metabolism;Metabolism;Metabolism;Cellular Processes	Global and overview maps;Global and overview maps;Metabolism of cofactors and vitamins;Transport and catabolism	https://www.kegg.jp/kegg-bin/show_pathway?map01100;https://www.kegg.jp/kegg-bin/show_pathway?map01240;https://www.kegg.jp/kegg-bin/show_pathway?map00760;https://www.kegg.jp/kegg-bin/show_pathway?map04144
13	Receptor Mediated Endocytosis	F. gigantica	tr|A0A504Z6J5|A0A504Z6J5_FASGI	1	1	2.564	546	62259	developmental process;reproductive process;biological regulation;multicellular organismal process;cellular process;metabolic process;localization	cellular anatomical entity	binding;catalytic activity	cyto(18); cyto_nucl(13.5)
13	cAMP-dependent protein kinase type II-alpha regulatory subunit (Fragment)	F. gigantica	tr|A0A504YK85|A0A504YK85_FASGI	1	1	4.046	346	39035.3	biological regulation;multicellular organismal process;rhythmic process;behavior;cellular process	cellular anatomical entity	binding	nucl(17); cyto(13)
13	40S ribosomal protein S28	F. gigantica	tr|A0A504YPY0|A0A504YPY0_FASGI	1	1	13.24	68	7719.9	cellular process;metabolic process;localization;biological regulation;viral process	protein-containing complex;cellular anatomical entity	binding;catalytic activity;structural molecule activity	extr(16)	ko03010;ko05171	Ribosome; Coronavirus disease - COVID-19	Genetic Information Processing;Human Diseases	Translation;Infectious disease: viral	https://www.kegg.jp/kegg-bin/show_pathway?map03010;https://www.kegg.jp/kegg-bin/show_pathway?map05171
13	F-actin-capping protein subunit alpha	F. gigantica	tr|A0A504YCW2|A0A504YCW2_FASGI	1	1	10.17	118	13239.1	--	--	--	extr(16)	ko04144	Endocytosis	Cellular Processes	Transport and catabolism	https://www.kegg.jp/kegg-bin/show_pathway?map04144
13	Glycerol kinase	F. gigantica	tr|A0A504YZW8|A0A504YZW8_FASGI	1	1	2.754	581	63666.7	biological regulation;cellular process;response to stimulus;metabolic process	cellular anatomical entity	binding;catalytic activity	cyto(10.5)	ko01100;ko00561	Metabolic pathways; Glycerolipid metabolism	Metabolism;Metabolism	Global and overview maps;Lipid metabolism	https://www.kegg.jp/kegg-bin/show_pathway?map01100;https://www.kegg.jp/kegg-bin/show_pathway?map00561
13	Serpin	F. gigantica	tr|A0A504YJ47|A0A504YJ47_FASGI	1	1	2.696	408	46555.6	--	--	--	mito(13); cyto(11)
13	BRO1 domain and CAAX motif containing	F. gigantica	tr|A0A504YRB3|A0A504YRB3_FASGI	1	1	2.098	429	48672.6	--	cellular anatomical entity	--	mito(27.5); cyto_mito(14.5)
13	Ras protein Ral-A	F. gigantica	tr|A0A504YMJ1|A0A504YMJ1_FASGI	1	1	8.387	155	17529	locomotion;reproductive process;immune system process;developmental process;biological regulation;response to stimulus;biological process involved in interspecies interaction between organisms;cellular process;localization	cellular anatomical entity	catalytic activity;binding	extr(13)
13	Serine/threonine-protein phosphatase CPPED1 丝氨酸/苏氨酸-蛋白磷酸酶 CPPED1	F. gigantica	tr|A0A504YHF5|A0A504YHF5_FASGI	1	1	3.503	314	35760.8	--	--	--	mito(13); nucl(10.5); cyto_nucl(10.5)
16	Vacuolar protein sorting-associated protein 16 homolog	F. gigantica	tr|A0A504YZK4|A0A504YZK4_FASGI	1	1	0.9804	918	102154	cellular process;localization	protein-containing complex;cellular anatomical entity	binding	nucl(27)
16	Exportin-2	F. gigantica	tr|A0A504YZP5|A0A504YZP5_FASGI	2	2	2.585	967	107933	cellular process;biological regulation;localization	cellular anatomical entity	binding	plas(26.5); extr_plas(15)	ko03013	Nucleocytoplasmic transport	Genetic Information Processing	Translation	https://www.kegg.jp/kegg-bin/show_pathway?map03013
16	Xaa-Pro aminopeptidase	F. gigantica	tr|A0A504YBD7|A0A504YBD7_FASGI	1	1	2.02	594	65540.8	metabolic process	cellular anatomical entity	binding;catalytic activity	mito(22.5); cyto_mito(13.6667)
16	EGF-like domain-containing protein 含 EGF 样结构域的蛋白质	F. gigantica	tr|A0A504YKJ0|A0A504YKJ0_FASGI	1	1	0.5988	1837	209742	--	--	--	mito(11); extr(10)
16	Fumarate hydratase class I anaerobic	F. gigantica	tr|A0A504YJH6|A0A504YJH6_FASGI	1	1	5.098	255	27877.7	cellular process;metabolic process	--	catalytic activity	cyto(23); cyto_nucl(17.5)	ko01100;ko01200;ko00620;ko00020	Metabolic pathways; Carbon metabolism; Pyruvate metabolism; Citrate cycle (TCA cycle)	Metabolism;Metabolism;Metabolism;Metabolism	Global and overview maps;Global and overview maps;Carbohydrate metabolism;Carbohydrate metabolism	https://www.kegg.jp/kegg-bin/show_pathway?map01100;https://www.kegg.jp/kegg-bin/show_pathway?map01200;https://www.kegg.jp/kegg-bin/show_pathway?map00620;https://www.kegg.jp/kegg-bin/show_pathway?map00020
16	Vacuolar protein sorting-associated protein 16 homolog 空泡蛋白分选相关蛋白16同源物	F. gigantica	tr|A0A504YZK4|A0A504YZK4_FASGI	1	1	0.9804	918	102154	cellular process;localization	protein-containing complex;cellular anatomical entity	binding	nucl(27)
16	Alpha-mannosidase	F. gigantica	tr|A0A504Z0W3|A0A504Z0W3_FASGI	2	2	2.688	1079	124104	metabolic process;cellular process	cellular anatomical entity	catalytic activity	mito(13)	ko04142;ko00511	Lysosome; Other glycan degradation	Cellular Processes;Metabolism	Transport and catabolism;Glycan biosynthesis and metabolism	https://www.kegg.jp/kegg-bin/show_pathway?map04142;https://www.kegg.jp/kegg-bin/show_pathway?map00511
16	NAD-dependent succinate-semialdehyde dehydrogenase NAD依赖性琥珀酸半醛脱氢酶	F. gigantica	tr|A0A504YWE3|A0A504YWE3_FASGI	1	1	3.916	332	35221	cellular process;developmental process;metabolic process;multicellular organismal process;biological regulation	cellular anatomical entity	catalytic activity;binding	extr(24)	ko01100;ko00250;ko00650	Metabolic pathways; Alanine, aspartate and glutamate metabolism; Butanoate metabolism	Metabolism;Metabolism;Metabolism	Global and overview maps;Amino acid metabolism;Carbohydrate metabolism	https://www.kegg.jp/kegg-bin/show_pathway?map01100;https://www.kegg.jp/kegg-bin/show_pathway?map00250;https://www.kegg.jp/kegg-bin/show_pathway?map00650
16	Guanylate kinase	F. gigantica	tr|A0A504YCZ1|A0A504YCZ1_FASGI	1	1	2.191	639	72179.4	--	cellular anatomical entity	catalytic activity	mito(12.5)
16	Eukaryotic translation initiation factor 5A 真核翻译起始因子5A	F. gigantica	tr|A0A504YWG8|A0A504YWG8_FASGI	1	1	6.452	186	20646.1	metabolic process;response to stimulus;cellular process;localization;reproductive process;developmental process;biological regulation	cellular anatomical entity;protein-containing complex	binding;translation regulator activity	cyto_nucl(13.5); cyto(12.5)
16	Vesicle-fusing ATPase	F. gigantica	tr|A0A504Z083|A0A504Z083_FASGI	1	1	1.794	669	74114.8	metabolic process;cellular process;localization;locomotion;developmental process;multicellular organismal process;biological regulation	cellular anatomical entity;protein-containing complex	catalytic activity;binding	cyto(19); cyto_nucl(12.5)
16	AQP-1	F. gigantica	tr|A0A504YFH3|A0A504YFH3_FASGI	1	1	3.086	324	35648.4	localization	cellular anatomical entity	transporter activity
16	Methylmalonyl-CoA epimerase /ethylmalonyl-CoA epimerase	F. gigantica	tr|A0A504YLH9|A0A504YLH9_FASGI	1	1	10	150	16273.6	metabolic process;cellular process	cellular anatomical entity	catalytic activity;binding	plas(32)	ko01100;ko01200;ko00630;ko00280;ko00640	Metabolic pathways	Metabolism	Global and overview maps	https://www.kegg.jp/kegg-bin/show_pathway?map01100
16	Uncharacterized protein	F. gigantica	tr|A0A504YNR4|A0A504YNR4_FASGI	1	1	9.434	106	12561.2	--	--	--	cyto_nucl(17.5); cyto(14.5); nucl(11.5)		Carbon metabolism; Glyoxylate and dicarboxylate metabolism; Valine, leucine and isoleucine degradation; Propanoate metabolism	Metabolism;Metabolism;Metabolism;Metabolism	Global and overview maps;Carbohydrate metabolism;Amino acid metabolism;Carbohydrate metabolism	https://www.kegg.jp/kegg-bin/show_pathway?map01200;https://www.kegg.jp/kegg-bin/show_pathway?map00630;https://www.kegg.jp/kegg-bin/show_pathway?map00280;https://www.kegg.jp/kegg-bin/show_pathway?map00640
