# Supplementary material for: Proteomic analysis of Fasciola gigantica excretory and secretory products (FgESPs) co-immunoprecipitated using a time course of infected buffalo sera
Source: Front Microbiol. 2022 Dec 23;13:1089394. doi: 10.3389/fmicb.2022.1089394 (PMC9816151; doi:10.3389/fmicb.2022.1089394)
Supplement: Supplementary file 7 [file Table_7.XLSX]

## Sheet: Sheet1
Table S7. Specific proteins identified at multiple wpi in the infection group.
Preiod (wpi)	Protein Names	Species	Acc	#Peptide	#Unique Peptide	Coverage(%)	Length	Mass	GO function(Biological Process)	GO function(Cellular Component)	GO function(Molecular Function)	Subcelular locate	KEEG Pathway ID	KEEG Pathway Name	KEEG Category	KEEG Class	KEEG Hyperlink
1&3	Microtubule-associated protein futsch	F.gigantica	tr|A0A504YJP1|A0A504YJP1_FASGI	1	1	1.033	968	103320	biological regulation;biological process involved in interspecies interaction between organisms;developmental process;immune system process;cellular process;metabolic process;response to stimulus	cellular anatomical entity	binding	cyto_nucl;nucl;cyto;	--	--	--	--	--
6&8	Programmed cell death 6-interacting protein	F.gigantica	tr|A0A504YU64|A0A504YU64_FASGI	1	1	6.542	214	23686.8	--	--	--	cyto_nucl;nucl	ko04144	Endocytosis	Cellular Processes	Transport and catabolism	https://www.kegg.jp/kegg-bin/show_pathway?map04144
6&8	Uncharacterized protein	F.gigantica	tr|A0A504YFS4|A0A504YFS4_FASGI	1	1	13.77	138	15523.8	--	--	catalytic activity	mito	--	--	--	--	--
6&8	Thimet oligopeptidase (M03 family)	F.gigantica	tr|A0A504YVZ5|A0A504YVZ5_FASGI	1	1	6.593	182	21442.7	cellular process;biological regulation;metabolic process	--	binding;catalytic activity	cyto;cyto_plas;cyto_nucl	--	--	--	--	--
10&13&16	Uncharacterized protein	F.gigantica	tr|A0A504YHW8|A0A504YHW8_FASGI	1	1	6.842	190	21732.8	metabolic process	--	catalytic activity	cyto;extr	ko04142	Lysosome	Cellular Processes	Transport and catabolism	https://www.kegg.jp/kegg-bin/show_pathway?map04142
10&13&16	Dipeptidyl peptidase 2 (Fragment)	F.gigantica	tr|A0A504YQJ5|A0A504YQJ5_FASGI	1	1	20.37	54	6119.9	metabolic process	cellular anatomical entity	catalytic activity	cysk	--	--	--	--	--
10&13&16	Alpha-galactosidase	F.gigantica	tr|A0A504YXB0|A0A504YXB0_FASGI	2	2	3.073	716	82584.6	metabolic process	--	catalytic activity	--	--	--	--	--	--
10&13&16	Threonine ammonia-lyase	F.gigantica	tr|A0A504YJT7|A0A504YJT7_FASGI	1	1	3.956	455	48780.3	cellular process;metabolic process	cellular anatomical entity	binding;catalytic activity	cyto;cyto_nucl	ko01100;ko01200;ko01230;ko00260;ko00290	Metabolic pathways; Carbon metabolism; Biosynthesis of amino acids; Glycine, serine and threonine metabolism; Valine, leucine and isoleucine biosynthesis	Metabolism;Metabolism;Metabolism;Metabolism;Metabolism	Global and overview maps;Global and overview maps;Global and overview maps;Amino acid metabolism;Amino acid metabolism	https://www.kegg.jp/kegg-bin/show_pathway?map01100;https://www.kegg.jp/kegg-bin/show_pathway?map01200;https://www.kegg.jp/kegg-bin/show_pathway?map01230;https://www.kegg.jp/kegg-bin/show_pathway?map00260;https://www.kegg.jp/kegg-bin/show_pathway?map00290
10&13&16	Retinol dehydrogenase 12	F.gigantica	tr|A0A504YAT2|A0A504YAT2_FASGI	1	1	3.846	338	37665.9	--	--	--	cyto;cyto_nucl;cyto_pero	ko01100;ko01240;ko00830	Metabolic pathways; Biosynthesis of cofactors; Retinol metabolism	Metabolism;Metabolism;Metabolism	Global and overview maps;Global and overview maps;Metabolism of cofactors and vitamins	https://www.kegg.jp/kegg-bin/show_pathway?map01100;https://www.kegg.jp/kegg-bin/show_pathway?map01240;https://www.kegg.jp/kegg-bin/show_pathway?map00830
10&13&16	Uncharacterized protein	F.gigantica	tr|A0A504Y4W0|A0A504Y4W0_FASGI	1	1	3.398	412	45222.1	--	--	--	extr	--	--	--	--	--
10&13&16	Calcium binding protein 39	F.gigantica	tr|A0A504YXL7|A0A504YXL7_FASGI	2	2	6.158	406	46613	biological regulation	cellular anatomical entity	binding	mito_nucl;mito;nucl	ko04150	mTOR signaling pathway	Environmental Information Processing	Signal transduction	https://www.kegg.jp/kegg-bin/show_pathway?map04150
10&13&16	Dihydrolipoamide acetyltransferase component of pyruvate dehydrogenase complex	F.gigantica	tr|A0A504YEA7|A0A504YEA7_FASGI	1	1	2.148	419	45555.4	cellular process;metabolic process	protein-containing complex;cellular anatomical entity	binding;catalytic activity	cyto;cyto_nucl	ko01100;ko00280;ko00640	Metabolic pathways; Valine, leucine and isoleucine degradation; Propanoate metabolism	Metabolism;Metabolism;Metabolism	Global and overview maps;Amino acid metabolism;Carbohydrate metabolism	https://www.kegg.jp/kegg-bin/show_pathway?map01100;https://www.kegg.jp/kegg-bin/show_pathway?map00280;https://www.kegg.jp/kegg-bin/show_pathway?map00640
10&13&16	Uncharacterized protein	F.gigantica	tr|A0A504YEF3|A0A504YEF3_FASGI	2	2	11.31	221	25942.6	--	--	--	cyto;extr	--	--	--	--	--
10&13&16	Transforming growth factor-beta-induced protein ig-h3 (Fragment)	F.gigantica	tr|A0A504YAW2|A0A504YAW2_FASGI	1	1	2.491	562	64182.2	cellular process;multicellular organismal process	cellular anatomical entity	binding	cyto;cyto_nucl	--	--	--	--	--
10&13&16	Legumain like	F.gigantica	tr|A0A504YCT9|A0A504YCT9_FASGI	2	2	5.923	439	49585.9	metabolic process	--	catalytic activity	extr	ko04142	Lysosome	Cellular Processes	Transport and catabolism	https://www.kegg.jp/kegg-bin/show_pathway?map04142
6&8&10&13	Heat shock protein kDa	F.gigantica	tr|A0A504Z3L5|A0A504Z3L5_FASGI	1	1	2.427	618	69845.6	--	--	--	cysk	ko04141;ko04144;ko04213;ko03040	Protein processing in endoplasmic reticulum; Endocytosis; Longevity regulating pathway - multiple species; Spliceosome	Genetic Information Processing;Cellular Processes;Organismal Systems;Genetic Information Processing	Folding, sorting and degradation;Transport and catabolism;Aging;Transcription	https://www.kegg.jp/kegg-bin/show_pathway?map04141;https://www.kegg.jp/kegg-bin/show_pathway?map04144;https://www.kegg.jp/kegg-bin/show_pathway?map04213;https://www.kegg.jp/kegg-bin/show_pathway?map03040
6&8&10&13	Retinaldehyde dehydrogenase type 2	F.gigantica	tr|A0A504YF29|A0A504YF29_FASGI	2	2	5.455	495	53275.9	--	--	catalytic activity	mito	ko01100;ko00010;ko00620;ko00280;ko01240;ko00330;ko00310;ko00770;ko00380;ko00981;ko00561;ko00410;ko00053;ko00340;ko00071;ko00830	Metabolic pathways; Glycolysis / Gluconeogenesis; Pyruvate metabolism; Valine, leucine and isoleucine degradation; Biosynthesis of cofactors; Arginine and proline metabolism; Lysine degradation; Pantothenate and CoA biosynthesis; Tryptophan metabolism; Insect hormone biosynthesis; Glycerolipid metabolism; beta-Alanine metabolism; Ascorbate and aldarate metabolism; Histidine metabolism; Fatty acid…	Metabolism;Metabolism;Metabolism;Metabolism;Metabolism;Metabolism;Metabolism;Metabolism;Metabolism;Metabolism;Metabolism;Metabolism;Metabolism;Metabolism;Metabolism;Metabolism	Global and overview maps;Carbohydrate metabolism;Carbohydrate metabolism;Amino acid metabolism;Global and overview maps;Amino acid metabolism;Amino acid metabolism;Metabolism of cofactors and vitamins;Carbohydrate metabolism;Amino acid metabolism;Lipid metabolism;Metabolism of cofactors and vitamins	https://www.kegg.jp/kegg-bin/show_pathway?map01100;https://www.kegg.jp/kegg-bin/show_pathway?map00010;https://www.kegg.jp/kegg-bin/show_pathway?map00620;https://www.kegg.jp/kegg-bin/show_pathway?map00280;https://www.kegg.jp/kegg-bin/show_pathway?map01240;https://www.kegg.jp/kegg-bin/show_pathway?map00330;https://www.kegg.jp/kegg-bin/show_pathway?map00310;https://www.kegg.jp/kegg-bin/show_pathway?…
8&10&13	AQP-1	F.gigantica	tr|A0A504YPC6|A0A504YPC6_FASGI	1	1	3.61	277	30431.2	localization	cellular anatomical entity	transporter activity	plas;cyto	--	--	--	--	--
8&10&13	Paramyosin	F.gigantica	tr|A0A504Z112|A0A504Z112_FASGI	2	2	1.233	1946	223176	--	cellular anatomical entity	cytoskeletal motor activity;binding	nucl;cyto_nucl	--	--	--	--	--
8&10&13	Dynein light chain	F.gigantica	tr|A0A504X0J9|A0A504X0J9_FASGI	2	2	18.95	95	11470	reproductive process;developmental process;multicellular organismal process;biological regulation;metabolic process;cellular process;localization	protein-containing complex;cellular anatomical entity	binding;catalytic activity	cyto;extr	ko05132	Salmonella infection	Human Diseases	Infectious disease: bacterial	https://www.kegg.jp/kegg-bin/show_pathway?map05132
8&10&13	Ubiquitin protein ligase BRE1	F.gigantica	tr|A0A504YUN9|A0A504YUN9_FASGI	4	4	6.984	902	100587	cellular process	cellular anatomical entity	--	cyto_nucl;nucl;cyto	--	--	--	--	--
6&8&10&13&16	ADP/ATP translocase	F.gigantica	tr|A0A504YFL1|A0A504YFL1_FASGI	2	2	6.431	311	34093.5	localization;cellular process;metabolic process	cellular anatomical entity	structural molecule activity;transporter activity	cyto	ko04217;ko04218;ko04020	Necroptosis; Cellular senescence; Calcium signaling pathway	Cellular Processes;Cellular Processes;Environmental Information Processing	Cell growth and death;Cell growth and death;Signal transduction	https://www.kegg.jp/kegg-bin/show_pathway?map04217;https://www.kegg.jp/kegg-bin/show_pathway?map04218;https://www.kegg.jp/kegg-bin/show_pathway?map04020
6&8&10&13&16	Glucose-6-phosphate isomerase	F.gigantica	tr|A0A504YE35|A0A504YE35_FASGI	1	1	6.164	292	32854.6	biological regulation;multicellular organismal process;developmental process;immune system process;cellular process;metabolic process	cellular anatomical entity	catalytic activity;binding	E.R.	ko01100;ko01200	Metabolic pathways; Carbon metabolism	Metabolism;Metabolism	Global and overview maps;Global and overview maps	https://www.kegg.jp/kegg-bin/show_pathway?map01100;https://www.kegg.jp/kegg-bin/show_pathway?map01200
6&8&10&13&16	Carbonyl reductase	F.gigantica	tr|A0A504YXL4|A0A504YXL4_FASGI	3	3	17.31	283	31372.6	--	--	catalytic activity	cyto;cyto_nucl	ko01100;ko00980;ko00590;ko00790	Metabolic pathways; Metabolism of xenobiotics by cytochrome P450; Arachidonic acid metabolism; Folate biosynthesis	Metabolism;Metabolism;Metabolism;Metabolism	Global and overview maps;Xenobiotics biodegradation and metabolism;Lipid metabolism;Metabolism of cofactors and vitamins	https://www.kegg.jp/kegg-bin/show_pathway?map01100;https://www.kegg.jp/kegg-bin/show_pathway?map00980;https://www.kegg.jp/kegg-bin/show_pathway?map00590;https://www.kegg.jp/kegg-bin/show_pathway?map00790
6&8&10&13&16	Glycine hydroxymethyltransferase (Fragment)	F.gigantica	tr|A0A504YE73|A0A504YE73_FASGI	1	1	3.107	354	38628.7	metabolic process;response to stimulus;cellular process	protein-containing complex;cellular anatomical entity	binding;catalytic activity	cyto;cysk;cyto_nucl	ko01100;ko01200;ko01230;ko00630;ko01240;ko00670;ko00260	Metabolic pathways; Carbon metabolism; Biosynthesis of amino acids; Glyoxylate and dicarboxylate metabolism; Biosynthesis of cofactors; One carbon pool by folate; Glycine, serine and threonine metabolism	Metabolism;Metabolism;Metabolism;Metabolism;Metabolism;Metabolism;Metabolism	Global and overview maps;Global and overview maps;Global and overview maps;Carbohydrate metabolism;Global and overview maps;Metabolism of cofactors and vitamins;Amino acid metabolism	https://www.kegg.jp/kegg-bin/show_pathway?map01100;https://www.kegg.jp/kegg-bin/show_pathway?map01200;https://www.kegg.jp/kegg-bin/show_pathway?map01230;https://www.kegg.jp/kegg-bin/show_pathway?map00630;https://www.kegg.jp/kegg-bin/show_pathway?map01240;https://www.kegg.jp/kegg-bin/show_pathway?map00670;https://www.kegg.jp/kegg-bin/show_pathway?map00260
6&8&10&13&16	Secreted cathepsin L 1	F.gigantica	tr|A0A504Y3C7|A0A504Y3C7_FASGI	3	3	9.158	273	31323.8	metabolic process	cellular anatomical entity	catalytic activity	extr	ko04145;ko04142;ko04140;ko04210	Phagosome; Lysosome; Autophagy - animal; Apoptosis	Cellular Processes;Cellular Processes;Cellular Processes;Cellular Processes	Transport and catabolism;Transport and catabolism;Transport and catabolism;Cell growth and death	https://www.kegg.jp/kegg-bin/show_pathway?map04145;https://www.kegg.jp/kegg-bin/show_pathway?map04142;https://www.kegg.jp/kegg-bin/show_pathway?map04140;https://www.kegg.jp/kegg-bin/show_pathway?map04210
6&8&10&13&16	Adenylyl cyclase-associated protein	F.gigantica	tr|A0A504YCH2|A0A504YCH2_FASGI	4	4	14.61	479	52879	cellular process;locomotion;developmental process;multicellular organismal process;biological regulation	cellular anatomical entity	binding;catalytic activity	cyto_nucl;cyto	--	--	--	--	--
6&8&10&13&16	Secreted cathepsin L 1	F.gigantica	tr|A0A504YXG7|A0A504YXG7_FASGI	2	2	6.226	257	29368.1	metabolic process	cellular anatomical entity	catalytic activity	extr	ko04145;ko04142;ko04140	Phagosome; Lysosome; Autophagy - animal	Cellular Processes;Cellular Processes;Cellular Processes	Transport and catabolism;Transport and catabolism;Transport and catabolism	https://www.kegg.jp/kegg-bin/show_pathway?map04145;https://www.kegg.jp/kegg-bin/show_pathway?map04142;https://www.kegg.jp/kegg-bin/show_pathway?map04140
6&8&10&13&16	Ubiquitin carboxyl-terminal hydrolase	F.gigantica	tr|A0A504YVF7|A0A504YVF7_FASGI	2	2	12.84	218	24623.9	developmental process;biological regulation;metabolic process;response to stimulus;behavior;multicellular organismal process;cellular process;localization	cellular anatomical entity	binding;catalytic activity	cyto;cyto_nucl	--	--	--	--	--
6&8&10&13&16	Dipeptidyl peptidase 2 (Fragment)	F.gigantica	tr|A0A504YXR1|A0A504YXR1_FASGI	10	10	29.08	447	50424	metabolic process	cellular anatomical entity	catalytic activity	extr	--	--	--	--	--
6&8&10&13&16	Adenylate kinase isoenzyme 1	F.gigantica	tr|A0A504Y532|A0A504Y532_FASGI	2	2	16.18	136	14963.3	developmental process;biological regulation;cellular process;response to stimulus;metabolic process	cellular anatomical entity	binding;catalytic activity	cyto	ko01100;ko01240;ko00230;ko00730	Metabolic pathways; Biosynthesis of cofactors; Retinol metabolism; Purine metabolism; Thiamine metabolism	Metabolism;Metabolism;Metabolism;Metabolism	Global and overview maps;Global and overview maps;Nucleotide metabolism;Metabolism of cofactors and vitamins	https://www.kegg.jp/kegg-bin/show_pathway?map01100;https://www.kegg.jp/kegg-bin/show_pathway?map01240;https://www.kegg.jp/kegg-bin/show_pathway?map00230;https://www.kegg.jp/kegg-bin/show_pathway?map00730
6&8&10&13&16	Dipeptidyl peptidase	F.gigantica	tr|A0A504Y6F5|A0A504Y6F5_FASGI	3	3	7.48	615	69059.9	metabolic process	cellular anatomical entity	binding;catalytic activity	mito	--	--	--	--	--
6&8&10&13&16	Lysosomal alpha-glucosidase	F.gigantica	tr|A0A504YSY0|A0A504YSY0_FASGI	13	13	20.88	1322	149139	--	cellular anatomical entity	catalytic activity	extr	ko01100;ko00500;ko04142;ko00052	Metabolic pathways; Starch and sucrose metabolism; Lysosome; Galactose metabolism	Metabolism;Metabolism;Cellular Processes;Metabolism	Global and overview maps;Carbohydrate metabolism;Transport and catabolism;Carbohydrate metabolism	https://www.kegg.jp/kegg-bin/show_pathway?map01100;https://www.kegg.jp/kegg-bin/show_pathway?map00500;https://www.kegg.jp/kegg-bin/show_pathway?map04142;https://www.kegg.jp/kegg-bin/show_pathway?map00052
6&8&10&13&16	Vitellogenic cathepsin-B like protease	F.gigantica	tr|A0A504Z0F3|A0A504Z0F3_FASGI	5	5	18.88	339	38125.5	biological regulation;metabolic process	--	catalytic activity	extr	ko04140;ko04142	Autophagy - animal; Lysosome	Cellular Processes;Cellular Processes	Transport and catabolism;Transport and catabolism	https://www.kegg.jp/kegg-bin/show_pathway?map04140;https://www.kegg.jp/kegg-bin/show_pathway?map04142
6&8&10&13&16	Dynein light chain	F.gigantica	tr|A0A504YPY2|A0A504YPY2_FASGI	1	1	23.6	89	10428.8	multicellular organismal process;localization;cellular process;biological regulation;reproductive process;immune system process;developmental process;metabolic process	cellular anatomical entity;protein-containing complex	binding;catalytic activity;cytoskeletal motor activity	cyto_nucl;cyto_plas;cyto	ko05132	Salmonella infection	Human Diseases	Infectious disease: bacterial	https://www.kegg.jp/kegg-bin/show_pathway?map05132
8&10&13&16	Polyubiquitine protein	F.gigantica	tr|A0A504YBE5|A0A504YBE5_FASGI	2	2	15.13	119	13227.8	response to stimulus;metabolic process;biological regulation;multi-organism process;immune system process;developmental process;reproductive process;localization;cellular process;multicellular organismal process;viral process	cellular anatomical entity	binding	cyto_nucl;cyto_plas;nucl;cyto	ko04120;ko04137;ko05022;ko05012;ko05167	Ubiquitin mediated proteolysis; Mitophagy - animal; Pathways of neurodegeneration - multiple diseases; Parkinson disease; Kaposi sarcoma-associated herpesvirus infection	Genetic Information Processing;Cellular Processes;Human Diseases;Human Diseases;Human Diseases	Folding, sorting and degradation;Transport and catabolism;Neurodegenerative disease;Neurodegenerative disease;Infectious disease: viral	https://www.kegg.jp/kegg-bin/show_pathway?map04120;https://www.kegg.jp/kegg-bin/show_pathway?map04137;https://www.kegg.jp/kegg-bin/show_pathway?map05022;https://www.kegg.jp/kegg-bin/show_pathway?map05012;https://www.kegg.jp/kegg-bin/show_pathway?map05167
8&10&13&16	Lysosomal alpha-glucosidase	F.gigantica	tr|A0A504Y9I5|A0A504Y9I5_FASGI	6	2	17.49	463	52558.5	multicellular organismal process;metabolic process;cellular process	--	catalytic activity	plas;extr	ko01100;ko00500;ko04142;ko00052	Metabolic pathways; Starch and sucrose metabolism; Lysosome; Galactose metabolism	Metabolism;Metabolism;Cellular Processes;Metabolism	Global and overview maps;Carbohydrate metabolism;Transport and catabolism;Carbohydrate metabolism	https://www.kegg.jp/kegg-bin/show_pathway?map01100;https://www.kegg.jp/kegg-bin/show_pathway?map00500;https://www.kegg.jp/kegg-bin/show_pathway?map04142;https://www.kegg.jp/kegg-bin/show_pathway?map00052
8&10&13&16	Beta-galactosidase	F.gigantica	tr|A0A504YNM0|A0A504YNM0_FASGI	4	4	7.622	656	74894.6	metabolic process	cellular anatomical entity	binding;catalytic activity	cyto	ko01100;ko00052;ko04142;ko00600;ko00604;ko00511;ko00531	Metabolic pathways; Galactose metabolism; Lysosome; Sphingolipid metabolism; Glycosphingolipid biosynthesis - ganglio series; Other glycan degradation; Glycosaminoglycan degradation	Metabolism;Metabolism;Cellular Processes;Metabolism;Metabolism;Metabolism;Metabolism	Global and overview maps;Carbohydrate metabolism;Transport and catabolism;Lipid metabolism;Glycan biosynthesis and metabolism;Glycan biosynthesis and metabolism;Glycan biosynthesis and metabolism	https://www.kegg.jp/kegg-bin/show_pathway?map01100;https://www.kegg.jp/kegg-bin/show_pathway?map00052;https://www.kegg.jp/kegg-bin/show_pathway?map04142;https://www.kegg.jp/kegg-bin/show_pathway?map00600;https://www.kegg.jp/kegg-bin/show_pathway?map00604;https://www.kegg.jp/kegg-bin/show_pathway?map00511;https://www.kegg.jp/kegg-bin/show_pathway?map00531
8&10&13&16	Uncharacterized protein	F.gigantica	tr|A0A504Y7T1|A0A504Y7T1_FASGI	3	1	7.623	446	49615.8	--	--	--	cyto;nucl;cyto_nucl	--	--	--	--	--
8&10&13&16	Uncharacterized protein	F.gigantica	tr|A0A504YVL5|A0A504YVL5_FASGI	2	2	11.42	219	24733.7	--	--	--	extr	--	--	--	--	--
8&10&13&16	Uncharacterized protein (Fragment)	F.gigantica	tr|A0A504Z3S9|A0A504Z3S9_FASGI	1	1	2.342	726	78466.1	cellular process	--	--	plas	--	--	--	--	--
8&10&13&16	Regulator of microtubule dynamics protein 1	F.gigantica	tr|A0A504YZZ9|A0A504YZZ9_FASGI	1	1	6.122	196	22689.8	--	cellular anatomical entity	--	cyto	--	--	--	--	--
8&10&13&16	Uncharacterized protein	F.gigantica	tr|A0A504WY94|A0A504WY94_FASGI	2	2	19.26	135	14008.6	--	--	--	plas	--	--	--	--	--
8&10&13&16	IST1 homolog	F.gigantica	tr|A0A504Y734|A0A504Y734_FASGI	1	1	3.014	365	39383.8	biological adhesion;biological regulation;viral process;metabolic process;growth;biological process involved in interspecies interaction between organisms;response to stimulus;localization;cellular process;developmental process	cellular anatomical entity	binding	cyto_nucl;cyto	ko04144	Endocytosis	Cellular Processes	Transport and catabolism	https://www.kegg.jp/kegg-bin/show_pathway?map04144
8&10&13&16	Mediator of cell motility 1	F.gigantica	tr|A0A504YL84|A0A504YL84_FASGI	2	2	9.459	296	33357.3	biological regulation	cellular anatomical entity	binding	cyto_nucl;nucl	--	--	--	--	--
8&10&13&16	Rab GDP dissociation inhibitor	F.gigantica	tr|A0A504YZV0|A0A504YZV0_FASGI	3	2	8.088	408	46701.5	localization;biological regulation	protein-containing complex;cellular anatomical entity	molecular function regulator	cysk	--	--	--	--	--
8&10&13&16	Phosphoglycerate kinase	F.gigantica	tr|A0A504Z124|A0A504Z124_FASGI	1	1	4.578	415	44179.2	locomotion;metabolic process;cellular process;response to stimulus;reproductive process	cellular anatomical entity	catalytic activity;binding	cyto	ko01100;ko01200;ko01230;ko00010	Metabolic pathways; Carbon metabolism; Biosynthesis of amino acids; Glycolysis / Gluconeogenesis	Metabolism;Metabolism;Metabolism;Metabolism	Global and overview maps;Global and overview maps;Global and overview maps;Carbohydrate metabolism	https://www.kegg.jp/kegg-bin/show_pathway?map01100;https://www.kegg.jp/kegg-bin/show_pathway?map01200;https://www.kegg.jp/kegg-bin/show_pathway?map01230;https://www.kegg.jp/kegg-bin/show_pathway?map00010
8&10&13&16	Vitellogenin domain-containing protein	F.gigantica	tr|A0A504YJU5|A0A504YJU5_FASGI	3	3	2.805	1141	128598	localization	--	--	nucl;mito	--	--	--	--	--
8&10&13&16	Phospholipase B-like	F.gigantica	tr|A0A504YRJ4|A0A504YRJ4_FASGI	3	3	11.06	416	47893.3	--	cellular anatomical entity	--	extr	--	--	--	--	--
8&10&13&16	RNA helicase	F.gigantica	tr|A0A504YKU1|A0A504YKU1_FASGI	2	2	7.436	390	44118.1	cellular process;reproductive process;developmental process;multicellular organismal process;metabolic process;locomotion;localization;response to stimulus;growth;biological regulation	protein-containing complex;cellular anatomical entity	catalytic activity;translation regulator activity;ATP-dependent activity;binding	nucl	--	--	--	--	--
8&10&13&16	Glucose transporter	F.gigantica	tr|A0A504YVY4|A0A504YVY4_FASGI	1	1	2.507	359	38204.6	cellular process;localization	cellular anatomical entity	binding;transporter activity	plas	ko04068	FoxO signaling pathway	Environmental Information Processing	Signal transduction	https://www.kegg.jp/kegg-bin/show_pathway?map04068
13&16	Uncharacterized protein	F.gigantica	tr|A0A504Z2M2|A0A504Z2M2_FASGI	1	1	1.105	1177	131520	--	--	--	--	--	--	--	--	--
13&16	Cysteine proteinase 2	F.gigantica	tr|A0A504YF23|A0A504YF23_FASGI	2	1	27.59	145	16815.7	metabolic process	cellular anatomical entity	catalytic activity	extr	ko04142;ko04145;ko04140;ko04210	Lysosome; Phagosome; Autophagy - animal; Apoptosis	Cellular Processes;Cellular Processes;Cellular Processes;Cellular Processes	Transport and catabolism;Transport and catabolism;Transport and catabolism;Cell growth and death	https://www.kegg.jp/kegg-bin/show_pathway?map04142;https://www.kegg.jp/kegg-bin/show_pathway?map04145;https://www.kegg.jp/kegg-bin/show_pathway?map04140;https://www.kegg.jp/kegg-bin/show_pathway?map04210
13&16	Preprocathepsin cathepsin L	F.gigantica	tr|A0A504Y6Y7|A0A504Y6Y7_FASGI	4	3	18.4	326	36583.1	metabolic process	cellular anatomical entity	catalytic activity	extr	ko04142;ko04145;ko04140	Lysosome; Phagosome; Autophagy - animal	Cellular Processes;Cellular Processes;Cellular Processes	Transport and catabolism;Transport and catabolism;Transport and catabolism	https://www.kegg.jp/kegg-bin/show_pathway?map04142;https://www.kegg.jp/kegg-bin/show_pathway?map04145;https://www.kegg.jp/kegg-bin/show_pathway?map04140
13&16	Receptor expression-enhancing protein	F.gigantica	tr|A0A504YLC6|A0A504YLC6_FASGI	1	1	17.5	120	13771.9	--	cellular anatomical entity	binding	--	--	--	--	--	--
13&16	Translationally controlled tumor-associated	F.gigantica	tr|A0A504Y9U6|A0A504Y9U6_FASGI	2	2	10.65	169	19896.4	biological process involved in interspecies interaction between organisms;biological regulation;response to stimulus	cellular anatomical entity;protein-containing complex	binding	cyto;cyto_nucl;cyto_plas		--	--	--	--
13&16	Fructose-bisphosphatase	F.gigantica	tr|A0A504XEA1|A0A504XEA1_FASGI	7	2	41.38	290	31263.5	cellular process;metabolic process	--	binding;catalytic activity	--	--	--	--	--	--
13&16	Cathepsin B	F.gigantica	tr|A0A504Y8C0|A0A504Y8C0_FASGI	1	1	4.082	343	38071.9	metabolic process	cellular anatomical entity	catalytic activity	--	ko04142;ko04140	Lysosome; Autophagy - animal	Cellular Processes;Cellular Processes	Transport and catabolism;Transport and catabolism	https://www.kegg.jp/kegg-bin/show_pathway?map04142;https://www.kegg.jp/kegg-bin/show_pathway?map04140
